# Supplementary material for: Gene age shapes the transcriptional landscape of sexual morphogenesis in mushroom-forming fungi (Agaricomycetes)
Source: eLife. 2022 Feb 14;11:e71348. doi: 10.7554/eLife.71348 (PMC8893723; doi:10.7554/eLife.71348)
Supplement: Supplementary file 1. [file elife-71348-supp1.xlsx]

## Sheet: Table S1
Table S1 Literature collected genes reported as developmental genes of Coprinopsis cinerea or isolated from the fruiting body of Pleurotus sp. and reviewed protein in Uniprot. NDE-Non Developmentally Expressed DE - Developmentally Expressed at least 2 fold change.
Entry	Gene name	Expression	protein ID	Reference
O74162	ich1	DE	PleosPC15_2_174811	Muraguchi, H., & Kamada, T. (1998). The ich1 gene of the mushroom Coprinus cinereus is essential for pileus formation in fruiting. Development, 125(16), 3133-3141.
A8N4Q8	Toxin-antitoxin system, toxin component	NDE	PleosPC15_2_1075683	Plaza, D. F., Lin, C. W., van der Velden, N. S. J., Aebi, M., & Künzler, M. (2014). Comparative transcriptomics of the model mushroom Coprinopsis cinerea reveals tissue-specific armories and a conserved circuitry for sexual development. BMC genomics, 15(1), 492.
A8NPI7	CCL1	DE	PleosPC15_2_1043947	Plaza, D. F., Lin, C. W., van der Velden, N. S. J., Aebi, M., & Künzler, M. (2014). Comparative transcriptomics of the model mushroom Coprinopsis cinerea reveals tissue-specific armories and a conserved circuitry for sexual development. BMC genomics, 15(1), 492.
A8N6V3	dst2	DE	PleosPC15_2_167785	Kamada, T., Sano, H., Nakazawa, T., & Nakahori, K. (2010). Regulation of fruiting body photomorphogenesis in Coprinopsis cinerea. Fungal Genetics and Biology, 47(11), 917-921.
A8NYG5	exp1	DE	PleosPC15_2_27233	Muraguchi, H., Fujita, T., Kishibe, Y., Konno, K., Ueda, N., Nakahori, K., ... & Kamada, T. (2008). The exp1 gene essential for pileus expansion and autolysis of the inky cap mushroom Coprinopsis cinerea (Coprinus cinereus) encodes an HMG protein. Fungal Genetics and Biology, 45(6), 890-896.
A8NEZ5	clp1	DE	PleosPC15_2_1061065	Inada, K., Morimoto, Y., Arima, T., Murata, Y., & Kamada, T. (2001). The clp1 gene of the mushroom Coprinus cinereus is essential for A-regulated sexual development. Genetics, 157(1), 133-140.
A8P1Y0	Ricin B-fold protein	DE	PleosPC15_2_163804	Plaza, D. F., Lin, C. W., van der Velden, N. S. J., Aebi, M., & Künzler, M. (2014). Comparative transcriptomics of the model mushroom Coprinopsis cinerea reveals tissue-specific armories and a conserved circuitry for sexual development. BMC genomics, 15(1), 492.
A8N9A0	ubc2	DE	PleosPC15_2_1066280	Nakazawa, T., Kondo, H., Nakahori, K., & Kamada, T. (2011). A mutation in the Cc. ubc2 gene affects clamp cell morphogenesis as well as nuclear migration for dikaryosis in Coprinopsis cinerea. Fungal genetics and biology, 48(5), 519-525.
A8N6B6	Peroxisome biogenesis factor 1	DE	PleosPC15_2_1112802	Stajich, J. E., Wilke, S. K., Ahrén, D., Au, C. H., Birren, B. W., Borodovsky, M., ... & Deng, J. (2010). Insights into evolution of multicellular fungi from the assembled chromosomes of the mushroom Coprinopsis cinerea (Coprinus cinereus). Proceedings of the National Academy of Sciences, 107(26), 11889-11894.
A8N920	Arp9	DE	PleosPC15_2_1043743	Nakazawa, T., Ando, Y., Hata, T., & Nakahori, K. (2016). A mutation in the Cc. arp9 gene encoding a putative actin-related protein causes defects in fruiting initiation and asexual development in the agaricomycete Coprinopsis cinerea. Current genetics, 62(3), 565-574.
A8NZU7	Thaumatin-like protein	DE	PleosPC15_2_1081316	Plaza, D. F., Lin, C. W., van der Velden, N. S. J., Aebi, M., & Künzler, M. (2014). Comparative transcriptomics of the model mushroom Coprinopsis cinerea reveals tissue-specific armories and a conserved circuitry for sexual development. BMC genomics, 15(1), 492.
Q8X1K0	cfs1	DE	PleosPC15_2_1075723	Liu, Y., Srivilai, P., Loos, S., Aebi, M., & Kües, U. (2006). An essential gene for fruiting body initiation in the basidiomycete Coprinopsis cinerea is homologous to bacterial cyclopropane fatty acid synthase genes. Genetics, 172(2), 873-884.
A8NCY4	dst1	DE	PleosPC15_2_1035381	Kamada, T., Sano, H., Nakazawa, T., & Nakahori, K. (2010). Regulation of fruiting body photomorphogenesis in Coprinopsis cinerea. Fungal Genetics and Biology, 47(11), 917-921.
D6RLZ3	Hemolysin	DE	PleosPC15_2_1112788	Plaza, D. F., Lin, C. W., van der Velden, N. S. J., Aebi, M., & Künzler, M. (2014). Comparative transcriptomics of the model mushroom Coprinopsis cinerea reveals tissue-specific armories and a conserved circuitry for sexual development. BMC genomics, 15(1), 492.
A8N7E4	rmt1	DE	PleosPC15_2_1089362	Nakazawa, T., Tatsuta, Y., Fujita, T., Nakahori, K., & Kamada, T. (2010). Mutations in the Cc. rmt1 gene encoding a putative protein arginine methyltransferase alter developmental programs in the basidiomycete Coprinopsis cinerea. Current genetics, 56(4), 361-367.
A8P299	eln3	DE	PleosPC15_2_1068875	Arima, T., Yamamoto, M., Hirata, A., Kawano, S., & Kamada, T. (2004). The eln3 gene involved in fruiting body morphogenesis of Coprinus cinereus encodes a putative membrane protein with a general glycosyltransferase domain. Fungal Genetics and Biology, 41(8), 805-812.
D6RN27	snf5	NDE	PleosPC15_2_1110282	Ando, Y., Nakazawa, T., Oka, K., Nakahori, K., & Kamada, T. (2013). Cc. snf5, a gene encoding a putative component of the SWI/SNF chromatin remodeling complex, is essential for sexual development in the agaricomycete Coprinopsis cinerea. Fungal genetics and biology, 50, 82-89.
A8NCV9	Cag1	DE	PleosPC15_2_1062194	Masuda, R., Iguchi, N., Tukuta, K., Nagoshi, T., Kemuriyama, K., & Muraguchi, H. (2016). The Coprinopsis cinerea Tup1 homologue Cag1 is required for gill formation during fruiting body morphogenesis. Biology open, 5(12), 1844-1852.
Q05058	Ccras	DE	PleosPC15_2_1094340	Ishibashi, O., & Shishido, K. (1993). Nucleotide sequence of a ras gene from the basidiomycete Coprinus cinereus. Gene, 125(2), 233-234.
A8NT98	NsdD2	DE	PleosPC15_2_1094410	Plaza, D. F., Lin, C. W., van der Velden, N. S. J., Aebi, M., & Künzler, M. (2014). Comparative transcriptomics of the model mushroom Coprinopsis cinerea reveals tissue-specific armories and a conserved circuitry for sexual development. BMC genomics, 15(1), 492.
A8NTU6	NsdD1	DE	PleosPC15_2_1113890	Plaza, D. F., Lin, C. W., van der Velden, N. S. J., Aebi, M., & Künzler, M. (2014). Comparative transcriptomics of the model mushroom Coprinopsis cinerea reveals tissue-specific armories and a conserved circuitry for sexual development. BMC genomics, 15(1), 492.
O74125	pcc1	DE	PleosPC15_2_1104604	Murata, Y., Fujii, M., Zolan, M. E., & Kamada, T. (1998). Molecular analysis of pcc1, a gene that leads to A-regulated sexual morphogenesis in Coprinus cinereus. Genetics, 149(4), 1753-1761.
Q08AB0	lcc17	DE	PleosPC15_2_1067328	Navarro González, M. (2008). Growth, fruiting body development and laccase production of selected coprini.
O74643	eln2	NDE	PleosPC15_2_35120	Muraguchi, H., & Kamada, T. (2000). A mutation in the eln2 gene encoding a cytochrome P450 of Coprinus cinereus affects mushroom morphogenesis. Fungal Genetics and Biology, 29(1), 49-59.
	Cag1	DE	PleosPC15_2_1062194	Masuda, R. et al. The Coprinopsis cinerea Tup1 homologue Cag1 is required for gill formation during fruiting body morphogenesis. Biol. Open 5, 1844–1852 (2016).
	GrrA	DE	PleosPC15_2_1103472	Krappmann S, Jung N, Medic B, Busch S, Prade RA, Braus GH. 2006. The Aspergillus nidulans F-box protein GrrA links SCF activity to meiosis. Mol Microbiol 61:76–88.
	Le.FAD2	DE	PleosPC15_2_1051856	H, S. & S, K. Cloning and functional characterization of a Delta12 fatty acid desaturase gene from the basidiomycete Lentinula edodes. Mol. Genet. Genomics
	Le.FAD1	DE	PleosPC15_2_20265	H, S. & S, K. A stearoyl-CoA-specific Delta 9 fatty acid desaturase from the basidiomycete Lentinula edodes. Biosci. Biotechnol. Biochem. 67, 2431–2437 (2003).
	ChiE1	DE	PleosPC15_2_50812	Zhou, J. et al. Chitinases Play a Key Role in Stipe Cell Wall Extension in the Mushroom Coprinopsis cinerea. Appl. Environ. Microbiol. 85, (2019).
	ChiE2	DE	PleosPC15_2_157064	Zhou, J. et al. Chitinases Play a Key Role in Stipe Cell Wall Extension in the Mushroom Coprinopsis cinerea. Appl. Environ. Microbiol. 85, (2019).
	ChiEn1	DE	PleosPC15_2_1079778	Zhou, J. et al. Chitinases Play a Key Role in Stipe Cell Wall Extension in the Mushroom Coprinopsis cinerea. Appl. Environ. Microbiol. 85, (2019).
	ChiEn3	DE	PleosPC15_2_1067912	Zhou, J. et al. Chitinases Play a Key Role in Stipe Cell Wall Extension in the Mushroom Coprinopsis cinerea. Appl. Environ. Microbiol. 85, (2019).
	ChiEn4	DE	PleosPC15_2_1076572	Zhou, J. et al. Chitinases Play a Key Role in Stipe Cell Wall Extension in the Mushroom Coprinopsis cinerea. Appl. Environ. Microbiol. 85, (2019).
A6YRN9	TP	DE	PleosPC15_2_1060842	Schwarz A, Goedl C, Minani A, Nidetzky B. Trehalose phosphorylase from Pleurotus ostreatus: characterization and stabilization by covalent modification, and application for the synthesis of alpha,alpha-trehalose. J Biotechnol. 2007 Mar 30;129(1):140-50. doi: 10.1016/j.jbiotec.2006.11.022. Epub 2006 Dec 2. PMID: 17222933.
P81055	MEP	DE	PleosPC15_2_1037634	Dohmae N, Hayashi K, Miki K, Tsumuraya Y, Hashimoto Y. Purification and characterization of intracellular proteinases in Pleurotus ostreatus fruiting bodies. Biosci Biotechnol Biochem. 1995 Nov;59(11):2074-80. doi: 10.1271/bbb.59.2074. PMID: 8541645.
P83467	OlyA6	DE	PleosPC15_2_1090164	Berne S, Krizaj I, Pohleven F, Turk T, Macek P, Sepcić K. Pleurotus and Agrocybe hemolysins, new proteins hypothetically involved in fungal fruiting. Biochim Biophys Acta. 2002 Apr 15;1570(3):153-9. doi: 10.1016/s0304-4165(02)00190-3. PMID: 12020804.
P81762	Guanyl-specific ribonuclease Po1	DE	PleosPC15_2_1088612	Nomura H, Inokuchi N, Kobayashi H, Koyama T, Iwama M, Ohgi K, Irie M. Purification and primary structure of a new guanylic acid specific ribonuclease from Pleurotus ostreatus. J Biochem. 1994 Jul;116(1):26-33. doi: 10.1093/oxfordjournals.jbchem.a124498. PMID: 7798182.
Q7M4T5	Serine proteinase inhibitor IA-2	DE	PleosPC15_2_1089399	Dohmae N, Takio K, Tsumuraya Y, Hashimoto Y. The complete amino acid sequences of two serine proteinase inhibitors from the fruiting bodies of a basidiomycete, Pleurotus ostreatus. Arch Biochem Biophys. 1995 Jan 10;316(1):498-506. doi: 10.1006/abbi.1995.1066. PMID: 7840656.
P84525	Eryngin	DE	PleosPC15_2_170470	Wang H, Ng TB. Eryngin, a novel antifungal peptide from fruiting bodies of the edible mushroom Pleurotus eryngii. Peptides. 2004 Jan;25(1):1-5. doi: 10.1016/j.peptides.2003.11.014. PMID: 15003349.
	Non-Developmentally expressed	3
	Developmentally expressed	36
	all	39
	ratio	0.923077
