# Supplementary material for: Gene age shapes the transcriptional landscape of sexual morphogenesis in mushroom-forming fungi (Agaricomycetes)
Source: eLife. 2022 Feb 14;11:e71348. doi: 10.7554/eLife.71348 (PMC8893723; doi:10.7554/eLife.71348)
Supplement: Supplementary file 3. [file elife-71348-supp3.xlsx]

## Sheet: Columns
Group	Cons_CM-specific: CM-specific conserved dev.reg orthogroup; Cons_Shared: Conserved orthogroup including Cryptococcus;
orbh	ortholog group ID
Cryne_JEC21_1	0-absence,1-presence, 2-FBDR2(FC4), 4-FBDR4(FC4)
Ptegra1	0-absence,1-presence, 2-FBDR2(FC4), 4-FBDR4(FC4)
PleosPC15_2	0-absence,1-presence, 2-FBDR2(FC4), 4-FBDR4(FC4)
Mk	0-absence,1-presence, 2-FBDR2(FC4), 4-FBDR4(FC4)
Auramp1	0-absence,1-presence, 2-FBDR2(FC4), 4-FBDR4(FC4)
Schco3	0-absence,1-presence, 2-FBDR2(FC4), 4-FBDR4(FC4)
Armosto1	0-absence,1-presence, 2-FBDR2(FC4), 4-FBDR4(FC4)
Agabi_varbisH97_2	0-absence,1-presence, 2-FBDR2(FC4), 4-FBDR4(FC4)
Copci_AmutBmut1	0-absence,1-presence, 2-FBDR2(FC4), 4-FBDR4(FC4)
Sum	number of proteins
wCD	number of developmentally regulated genes (>2FC) without Cryptococcus
wC_rD	rate of developmentally regulated genes (>2FC) without Cryptococcus relative to all present CM species in the orthogroup
meiotic	meiotic related orthologs (X) or not (-)
Agabi_varbisH97_21	protein ID
Armosto11	protein ID
Auramp11	protein ID
Copci_AmutBmut11	protein ID
Cryne_JEC21_11	protein ID
Mk1	protein ID
PleosPC15_21	protein ID
Ptegra11	protein ID
Schco31	protein ID
IPR1	InterPro annotation for proteins
IPR2	InterPro annotation for proteins
IPR3	InterPro annotation for proteins
IPR4	InterPro annotation for proteins
IPR5	InterPro annotation for proteins
IPR6	InterPro annotation for proteins
IPR7	InterPro annotation for proteins
IPR8	InterPro annotation for proteins
IPR9	InterPro annotation for proteins
IPR10	InterPro annotation for proteins
has.RBH.inxspecies
Orthologs	orthologues in other species based on Coprinopsis RBH search
Aspnid	orthologues in other species based on Coprinopsis RBH search
Candida	orthologues in other species based on Coprinopsis RBH search
S.pombe	orthologues in other species based on Coprinopsis RBH search
S.cerevisiae	orthologues in other species based on Coprinopsis RBH search
Neucr_Ustilago	orthologues in other species based on Coprinopsis RBH search

## Sheet: a) ORBH
Table S2a: Conserved 1:1 orthologue groups. For the detailed description of columns see "Columns" worksheet.
Group	orbh	Cryne_JEC21_1	Ptegra1	PleosPC15_2	Mk	Auramp1	Schco3	Armosto1	Agabi_varbisH97_2	Copci_AmutBmut1	Sum	wCD	wC_rD	meiotic	Agabi_varbisH97_21	Armosto11	Auramp11	Copci_AmutBmut11	Cryne_JEC21_11	Mk1	PleosPC15_21	Ptegra11	Schco31	IPR1	IPR2	IPR3	IPR4	IPR5	IPR6	IPR7	IPR8	IPR9	IPR10	has.RBH.inxspecies	Orthologs	Aspnid	Candida	S.pombe	S.cerevisiae	known genes
Cons_CM-specific	orbh_4365	0	4	4	2	1	2	4	4	4	8	7	0.875	-	Agabi_varbisH97_2_207587	Armosto1_271380	Auramp1_481274	Copci_AmutBmut1_513409		Mk_00069500	PleosPC15_2_1057607	Ptegra1_558817	Schco3_2623663	IPR006094::FAD linked oxidase; N-termil::8	IPR016166::FAD-binding domain; PCMH-type::8	IPR012951::Berberine/berberine-like::8	IPR036318::FAD-binding; type PCMH-like superfamily::8							187	AN1142_Aspnid	Uncharacterized ORF Has domains with predicted UDP-N-acetylmuramate dehydrogese activity; flavin adenine dinucleotide binding; oxidoreductase activity and role in oxidation-reduction process
Cons_CM-specific	orbh_4221	0	2	4	4	1	4	4	4	4	8	7	0.875	-	Agabi_varbisH97_2_195919	Armosto1_262324	Auramp1_496353	Copci_AmutBmut1_501135		Mk_00871200	PleosPC15_2_1101230	Ptegra1_553926	Schco3_2638893	IPR016166::FAD-binding domain; PCMH-type::8	IPR012951::Berberine/berberine-like::8	IPR036318::FAD-binding; type PCMH-like superfamily::8	IPR006094::FAD linked oxidase; N-termil::8	IPR016167::FAD-binding; type PCMH; subdomain 1::4	IPR016169::FAD-binding; type PCMH; subdomain 2::4					246	AN10388_Aspnid NCU09518_Neucr chitO_fusarium	Uncharacterized ORF Has domains with predicted FAD binding; UDP-N-acetylmuramate dehydrogese activity; flavin adenine dinucleotide binding; oxidoreductase activity; oxidoreductase activity; acting on CH-OH group of donors activity
Cons_CM-specific	orbh_5329	0	0	4	4	2	2	4	4	4	7	7	1	-	Agabi_varbisH97_2_185602	Armosto1_251105	Auramp1_392515	Copci_AmutBmut1_361584		Mk_01409300	PleosPC15_2_167785		Schco3_2630740	IPR016167::FAD-binding; type PCMH; subdomain 1::7	IPR036318::FAD-binding; type PCMH-like superfamily::7	IPR016169::FAD-binding; type PCMH; subdomain 2::7	IPR012951::Berberine/berberine-like::7	IPR016166::FAD-binding domain; PCMH-type::4						104	aurO_fusarium
Cons_CM-specific	orbh_3876	0	2	4	4	4	4	4	4	4	8	8	1	-	Agabi_varbisH97_2_186654	Armosto1_250029	Auramp1_488811	Copci_AmutBmut1_373141		Mk_00251500	PleosPC15_2_1073213	Ptegra1_593001	Schco3_2618842	IPR000425::Major intrinsic protein::8	IPR023271::Aquaporin-like::8	IPR022357::Major intrinsic protein; conserved site::7								363	YLL043W_FPS1_Sacce1 SPAC977.17_pombe			MIP water channel (predicted)	Aquaglyceroporin; plasma membrane channel; involved in efflux of glycerol and xylitol; and in uptake of acetic acid and the trivalent metalloids arsenite and antimonite; role in mediating passive diffusion of glycerol is key factor in maintence of redox balance; member of major intrinsic protein (MIP) family; phosphorylated by Hog1p MAPK under acetate stress; deletion improves xylose fermentation
Cons_CM-specific	orbh_1658	1	1	4	2	2	2	1	4	4	9	6	0.75	-	Agabi_varbisH97_2_194191	Armosto1_255342	Auramp1_509334	Copci_AmutBmut1_273601	Cryne_JEC21_1_5247	Mk_00311300	PleosPC15_2_1091892	Ptegra1_651228	Schco3_2642124	IPR013154::Alcohol dehydrogese; N-termil::9	IPR020843::Polyketide synthase; enoylreductase domain::9	IPR036291::D(P)-binding domain superfamily::9	IPR013149::Alcohol dehydrogese; C-termil::9	IPR011032::GroES-like superfamily::9						374	alcC_Aspnid YMR083W_ADH3_Sacce1 adh1_pombe YBR145W_ADH5_Sacce1 AN2286_alcC_Aspnid	Uncharacterized ORF Alcohol dehydrogese III with a predicted role in two-carbon compound metabolism required for long-term survival under aerobic conditions regulated at both the transcriptiol and translatiol levels		alcohol dehydrogese Adh1	Alcohol dehydrogese isoenzyme V; involved in ethanol production; ADH5 has a paralog; ADH1; that arose from the whole genome duplication
Cons_CM-specific	orbh_1803	1	2	2	2	1	1	2	2	2	9	6	0.75	-	Agabi_varbisH97_2_195434	Armosto1_256217	Auramp1_557398	Copci_AmutBmut1_363708	Cryne_JEC21_1_5541	Mk_01439100	PleosPC15_2_1068494	Ptegra1_659480	Schco3_2616106	IPR012675::Beta-grasp domain superfamily::9	IPR006058::2Fe-2S ferredoxin; iron-sulphur binding site::9	IPR017896::4Fe-4S ferredoxin-type; iron-sulphur binding domain::9	IPR009051::Alpha-helical ferredoxin::9	IPR025192::Succite dehydogese/fumarate reductase N-termil::9	IPR017900::4Fe-4S ferredoxin; iron-sulphur binding; conserved site::9	IPR036010::2Fe-2S ferredoxin-like superfamily::9	IPR001041::2Fe-2S ferredoxin-type iron-sulfur binding domain::9	IPR004489::Succite dehydrogese/fumarate reductase iron-sulphur protein::9		422	sdh2_pombe AN2332_Aspnid YLL041C_SDH2_Sacce1 SDH2_ustilago	Uncharacterized ORF Putative succite dehydrogese with a predicted role in the TCA cycle		succite dehydrogese (ubiquinone) iron-sulfur protein subunit (predicted)	Iron-sulfur protein subunit of succite dehydrogese; the complex couples the oxidation of succite to the transfer of electrons to ubiquinone as part of the TCA cycle and the mitochondrial respiratory chain; other members are Sdh1p; Sdh3p; and Sdh4p
Cons_CM-specific	orbh_2966	1	2	1	2	2	1	2	2	2	9	6	0.75	-	Agabi_varbisH97_2_77363	Armosto1_269805	Auramp1_409789	Copci_AmutBmut1_503237	Cryne_JEC21_1_3806	Mk_00513700	PleosPC15_2_1075708	Ptegra1_571206	Schco3_2643998	IPR036008::Aconitase; iron-sulfur domain::9	IPR001030::Aconitase/3-isopropylmalate dehydratase large subunit; alpha/beta/alpha domain::9	IPR015928::Aconitase/3-isopropylmalate dehydratase; swivel::9	IPR018136::Aconitase family; 4Fe-4S cluster binding site::9	IPR015931::Aconitase/3-isopropylmalate dehydratase large subunit; alpha/beta/alpha; subdomain 1/3::9	IPR000573::Aconitase A/isopropylmalate dehydratase small subunit; swivel domain::9	IPR015932::Aconitase; domain 2::9	IPR006248::Aconitase; mitochondrial-like::9			419	YLR304C_ACO1_Sacce1 ACO1_candida acoA_Aspnid tca-3_Neucr AN5525_acoA_Aspnid SPAC24C9.06c_pombe	Verified ORF Putative aconitate hydratase with a predicted role in the TCA cycle intracellular protein abundance decreased by medione stress protein expressed at increased levels in a hapX mutant versus wild-type		aconitate hydratase Aco1 (predicted)	Aconitase; required for the tricarboxylic acid (TCA) cycle and also independently required for mitochondrial genome maintence; phosphorylated; component of the mitochondrial nucleoid; mutation leads to glutamate auxotrophy
Cons_CM-specific	orbh_6770	0	0	2	0	4	4	4	0	4	5	5	1	-		Armosto1_254309	Auramp1_131538	Copci_AmutBmut1_442787			PleosPC15_2_1088056		Schco3_2637680	IPR037171::gB/RpiA transferase-like::5	IPR003702::Acetyl-CoA hydrolase/transferase::5	IPR026888::Acetyl-CoA hydrolase/transferase C-termil domain::5	IPR038460::Acetyl-CoA hydrolase/transferase; C-termil domain superfamily::5							273	AN1547_coaT_Aspnid ach1_pombe YBL015W_ACH1_Sacce1 ACH1_candida	Verified ORF Acyl-CoA:carboxylate CoA-transferase involved in detoxification of propionyl-CoA predicted role in acetate; acetaldehyde; and ethanol (two-carbon) metabolism expression upregulated after exposure to farnesol			Protein with CoA transferase activity; particularly for CoASH transfer from succinyl-CoA to acetate; has minor acetyl-CoA-hydrolase activity; phosphorylated; required for acetate utilization and for diploid pseudohyphal growth
Cons_CM-specific	orbh_2802	1	2	4	2	2	4	4	2	4	9	8	1	-	Agabi_varbisH97_2_64309	Armosto1_257911	Auramp1_597549	Copci_AmutBmut1_7036	Cryne_JEC21_1_3249	Mk_01192900	PleosPC15_2_37555	Ptegra1_588126	Schco3_2606041	IPR002938::FAD-binding domain::9	IPR036188::FAD/D(P)-binding domain superfamily::9	IPR027545::Kynurenine 3-monooxygese::8								397	AN5200_Aspnid B4_Neucr b4_Aspnid YBL098W_B4_Sacce1 B4_candida	Uncharacterized ORF Putative kynurenine 3-monooxygese with a predicted role in aromatic amino acid biosynthesis			Kynurenine 3-mono oxygese; required for the de novo biosynthesis of D from tryptophan via kynurenine; expression regulated by Hst1p; putative therapeutic target for Huntington disease
Cons_CM-specific	orbh_4500	0	2	4	2	1	1	4	4	4	8	6	0.75	-	Agabi_varbisH97_2_222577	Armosto1_268190	Auramp1_489959	Copci_AmutBmut1_547121		Mk_01160200	PleosPC15_2_30410	Ptegra1_576371	Schco3_2667624	IPR000192::Aminotransferase class V domain::8	IPR015421::Pyridoxal phosphate-dependent transferase; major domain::8	IPR015422::Pyridoxal phosphate-dependent transferase domain 1::8	IPR015424::Pyridoxal phosphate-dependent transferase::8							248
Cons_CM-specific	orbh_6339	0	4	4	1	4	2	4	0	0	6	5	0.833333	-		Armosto1_265244	Auramp1_410049			Mk_00862900	PleosPC15_2_1065795	Ptegra1_528902	Schco3_1188538	IPR006035::Ureohydrolase::6	IPR020855::Ureohydrolase; manganese-binding site::6	IPR023696::Ureohydrolase domain superfamily::6
Cons_CM-specific	orbh_6800	0	0	2	4	0	0	4	4	4	5	5	1	-	Agabi_varbisH97_2_196129	Armosto1_258105		Copci_AmutBmut1_421282		Mk_00559200	PleosPC15_2_1114338			IPR029510::Aldehyde dehydrogese; glutamic acid active site::5	IPR016161::Aldehyde/histidinol dehydrogese::5	IPR015590::Aldehyde dehydrogese domain::5	IPR016162::Aldehyde dehydrogese; N-termil::5	IPR016163::Aldehyde dehydrogese; C-termil::5	IPR016160::Aldehyde dehydrogese; cysteine active site::4					74	YMR170C_ALD2_Sacce1				Cytoplasmic aldehyde dehydrogese; involved in ethanol oxidation and beta-alanine biosynthesis; uses D+ as the preferred coenzyme; expression is stress induced and glucose repressed; very similar to Ald3p
Cons_CM-specific	orbh_6186	0	0	4	4	4	2	4	4	0	6	6	1	-	Agabi_varbisH97_2_218565	Armosto1_255972	Auramp1_567555			Mk_00315100	PleosPC15_2_1058778		Schco3_2501677	IPR000425::Major intrinsic protein::6	IPR023271::Aquaporin-like::6
Cons_CM-specific	orbh_4433	0	2	4	4	4	4	4	1	4	8	7	0.875	-	Agabi_varbisH97_2_212658	Armosto1_250230	Auramp1_473562	Copci_AmutBmut1_449824		Mk_00646200	PleosPC15_2_1112586	Ptegra1_637763	Schco3_2583489	IPR000210::BTB/POZ domain::1	IPR011333::SKP1/BTB/POZ domain superfamily::1									74
Cons_CM-specific	orbh_4631	0	1	2	4	4	4	4	4	4	8	7	0.875	-	Agabi_varbisH97_2_70125	Armosto1_250986	Auramp1_562808	Copci_AmutBmut1_459680		Mk_01414000	PleosPC15_2_1041143	Ptegra1_326668	Schco3_2630936	IPR011333::SKP1/BTB/POZ domain superfamily::8	IPR000210::BTB/POZ domain::8									70
Cons_CM-specific	orbh_4409	0	2	4	2	4	4	4	1	4	8	7	0.875	-	Agabi_varbisH97_2_211283	Armosto1_269939	Auramp1_414013	Copci_AmutBmut1_379603		Mk_00377200	PleosPC15_2_1067744	Ptegra1_504270	Schco3_2563016	IPR000210::BTB/POZ domain::7	IPR011333::SKP1/BTB/POZ domain superfamily::7									78
Cons_CM-specific	orbh_5992	0	1	0	4	4	4	2	0	4	6	5	0.833333	-		Armosto1_251057	Auramp1_472542	Copci_AmutBmut1_445867		Mk_01121800		Ptegra1_524359	Schco3_2630911	IPR000210::BTB/POZ domain::2	IPR011333::SKP1/BTB/POZ domain superfamily::1
Cons_CM-specific	orbh_7067	0	4	0	1	4	4	0	0	4	5	4	0.8	-			Auramp1_562689	Copci_AmutBmut1_475584		Mk_01409700		Ptegra1_406609	Schco3_2669239	IPR000210::BTB/POZ domain::5	IPR011333::SKP1/BTB/POZ domain superfamily::5									24
Cons_CM-specific	orbh_4166	0	2	1	4	1	4	4	1	4	8	5	0.625	-	Agabi_varbisH97_2_194630	Armosto1_261739	Auramp1_564572	Copci_AmutBmut1_375789		Mk_00431500	PleosPC15_2_1094896	Ptegra1_552638	Schco3_2636215	IPR008183::Aldose 1-/Glucose-6-phosphate 1-epimerase::8	IPR014718::Glycoside hydrolase-type carbohydrate-binding::8	IPR011013::Galactose mutarotase-like domain superfamily::8								309	AN3184_Aspnid NCU08516_Neucr	Uncharacterized ORF Putative aldose 1-epimerase with a predicted role in glucose metabolism transcriptiolly induced by growth on xylose
Cons_CM-specific	orbh_4175	0	1	4	4	1	1	4	2	4	8	5	0.625	-	Agabi_varbisH97_2_194857	Armosto1_253859	Auramp1_484585	Copci_AmutBmut1_503392		Mk_00236100	PleosPC15_2_1073309	Ptegra1_503326	Schco3_2628332	IPR016040::D(P)-binding domain::8	IPR006368::GDP-mannose 4;6-dehydratase::8	IPR036291::D(P)-binding domain superfamily::8								162
Cons_CM-specific	orbh_4000	0	2	4	2	4	1	4	4	2	8	7	0.875	-	Agabi_varbisH97_2_190841	Armosto1_267135	Auramp1_506836	Copci_AmutBmut1_384105		Mk_01230400	PleosPC15_2_1031712	Ptegra1_559256	Schco3_2604720	IPR012341::Six-hairpin glycosidase-like superfamily::8	IPR008928::Six-hairpin glycosidase superfamily::8	IPR010905::Glycosyl hydrolase; family 88::7								197	AN3991_Aspnid	Uncharacterized ORF Putative unsaturated glucuronyl hydrolase transcript upregulated by nitrate limitation
Cons_CM-specific	orbh_1120	1	1	4	1	2	2	4	4	4	9	6	0.75	-	Agabi_varbisH97_2_189950	Armosto1_268384	Auramp1_549898	Copci_AmutBmut1_453548	Cryne_JEC21_1_3146	Mk_00793200	PleosPC15_2_1088585	Ptegra1_522295	Schco3_2612068	IPR015793::Pyruvate kise; barrel::9	IPR036918::Pyruvate kise; C-termil domain superfamily::9	IPR001697::Pyruvate kise::9	IPR011037::Pyruvate kise-like; insert domain superfamily::9	IPR015806::Pyruvate kise; insert domain superfamily::9	IPR015795::Pyruvate kise; C-termil::9	IPR018209::Pyruvate kise; active site::9	IPR040442::Pyruvate kise-like domain superfamily::9	IPR015813::Pyruvate/Phosphoenolpyruvate kise-like domain superfamily::9		430	CDC19_candida YAL038W_CDC19_Sacce1 pkiA_Aspnid pyk1_pombe	Verified ORF Putative pyruvate kise with a predicted role in gluconeogenesis and glycolysis intracellular; medione stress-induced protein		pyruvate kise	Pyruvate kise; functions as a homotetramer in glycolysis to convert phosphoenolpyruvate to pyruvate; the input for aerobic (TCA cycle) or aerobic (glucose fermentation) respiration; regulated via allosteric activation by fructose bisphosphate; CDC19 has a paralog; PYK2; that arose from the whole genome duplication
Cons_CM-specific	orbh_6227	0	4	4	0	4	1	4	2	0	6	5	0.833333	-	Agabi_varbisH97_2_75421	Armosto1_251630	Auramp1_484740				PleosPC15_2_21100	Ptegra1_304077	Schco3_2543909	IPR011013::Galactose mutarotase-like domain superfamily::6	IPR000322::Glycoside hydrolase family 31::6	IPR013780::Glycosyl hydrolase; all-beta::6	IPR017853::Glycoside hydrolase superfamily::6
Cons_CM-specific	orbh_308	1	1	4	2	2	1	4	2	4	9	6	0.75	-	Agabi_varbisH97_2_136252	Armosto1_250548	Auramp1_544089	Copci_AmutBmut1_359312	Cryne_JEC21_1_3207	Mk_00684300	PleosPC15_2_1056178	Ptegra1_562892	Schco3_2509686	IPR029044::Nucleotide-diphospho-sugar transferases::9	IPR016267::UTP--glucose-1-phosphate uridylyltransferase::9	IPR002618::UDPGP family::9								433	YKL035W_UGP1_Sacce1 NCU02797_Neucr AN9148_galF_Aspnid UGP1_candida fyu1_pombe	Uncharacterized ORF Putative UTP-glucose-1-phosphate uridylyltransferase with a predicted role in galactose and galactitol metabolism protein expressed at decreased levels in a hapX mutant versus wild-type		UTP-glucose-1-phosphate uridylyltransferase Fyu1	UDP-glucose pyrophosphorylase (UGPase); catalyses the reversible formation of UDP-Glc from glucose 1-phosphate and UTP; involved in a wide variety of metabolic pathways; expression modulated by Pho85p through Pho4p; UGP1 has a paralog; YHL012W; that arose from the whole genome duplication
Cons_CM-specific	orbh_4503	1	1	4	0	1	1	4	4	4	8	4	0.571429	-	Agabi_varbisH97_2_222809	Armosto1_265378	Auramp1_560201	Copci_AmutBmut1_497782	Cryne_JEC21_1_2083		PleosPC15_2_51607	Ptegra1_523987	Schco3_76183	IPR005844::Alpha-D-phosphohexomutase; alpha/beta/alpha domain I::8	IPR016066::Alpha-D-phosphohexomutase; conserved site::8	IPR016055::Alpha-D-phosphohexomutase; alpha/beta/alpha I/II/III::8	IPR036900::Alpha-D-phosphohexomutase; C-termil domain superfamily::8	IPR005841::Alpha-D-phosphohexomutase superfamily::8	IPR005845::Alpha-D-phosphohexomutase; alpha/beta/alpha domain II::8	IPR005846::Alpha-D-phosphohexomutase; alpha/beta/alpha domain III::8	IPR005843::Alpha-D-phosphohexomutase; C-termil::3			426	YMR105C_PGM2_Sacce1 AN2867_pgmB_Aspnid NCU10058_Neucr pgmB_Aspnid SPBC32F12.10_pombe	Verified ORF Putative phosphoglucomutase with a predicted role in carbohydrate metabolism intracellular protein abundance decreased by medione stress transcript levels increase during asexual development		phosphoglucomutase (predicted)	Phosphoglucomutase; catalyzes the conversion from glucose-1-phosphate to glucose-6-phosphate; which is a key step in hexose metabolism; functions as the acceptor for a Glc-phosphotransferase; protein abundance increases in response to D replication stress; PGM2 has a paralog; PGM1; that arose from the whole genome duplication
Cons_CM-specific	orbh_4942	0	2	2	4	2	2	4	4	2	8	8	1	-	Agabi_varbisH97_2_72498	Armosto1_270525	Auramp1_398317	Copci_AmutBmut1_226525		Mk_01140200	PleosPC15_2_31445	Ptegra1_645501	Schco3_2487936	IPR020471::Aldo/keto reductase::8	IPR023210::DP-dependent oxidoreductase domain::8	IPR018170::Aldo/keto reductase; conserved site::8	IPR036812::DP-dependent oxidoreductase domain superfamily::8							290	SPAC26F1.07_pombe AN1679_Aspnid	Uncharacterized ORF Putative oxidoreductase with a predicted role in carbohydrate metabolism		glucose 1-dehydrogese (DP+) (predicted)
Cons_CM-specific	orbh_4961	0	1	2	4	4	1	4	2	4	8	6	0.75	-	Agabi_varbisH97_2_188016	Armosto1_271975	Auramp1_463879	Copci_AmutBmut1_381637		Mk_01500800	PleosPC15_2_37892	Ptegra1_586109	Schco3_2704979	IPR013780::Glycosyl hydrolase; all-beta::8	IPR033453::Glycosyl hydrolase family 30; TIM-barrel domain::8	IPR001139::Glycoside hydrolase family 30::8	IPR017853::Glycoside hydrolase superfamily::8							176
Cons_CM-specific	orbh_4257	0	1	4	4	2	4	2	4	4	8	7	0.875	-	Agabi_varbisH97_2_197957	Armosto1_250969	Auramp1_487080	Copci_AmutBmut1_450047		Mk_00128400	PleosPC15_2_1101437	Ptegra1_502724	Schco3_2611292	IPR036874::Carbonic anhydrase superfamily::8	IPR001765::Carbonic anhydrase::8									268	NCU01103_Neucr
Cons_CM-specific	orbh_5942	0	2	4	2	1	2	4	2	0	7	6	0.857143	-	Agabi_varbisH97_2_119011	Armosto1_251506	Auramp1_486681			Mk_01067800	PleosPC15_2_158081	Ptegra1_131689	Schco3_2610903	IPR036874::Carbonic anhydrase superfamily::1	IPR001765::Carbonic anhydrase::1
Cons_CM-specific	orbh_4740	0	2	4	4	4	4	4	2	4	8	8	1	-	Agabi_varbisH97_2_77291	Armosto1_252594	Auramp1_509712	Copci_AmutBmut1_419688		Mk_00513600	PleosPC15_2_1090797	Ptegra1_566416	Schco3_2681702	IPR038955::Protein PriA::3										73
Cons_CM-specific	orbh_5643	0	1	4	4	4	0	4	4	4	7	6	0.857143	-	Agabi_varbisH97_2_194809	Armosto1_253548	Auramp1_484636	Copci_AmutBmut1_438533		Mk_01000800	PleosPC15_2_1072120	Ptegra1_264248		IPR001338::Hydrophobin::7	IPR019778::Hydrophobin; conserved site::5									50
Cons_CM-specific	orbh_4998	0	2	4	4	1	1	4	4	4	8	6	0.75	-	Agabi_varbisH97_2_190982	Armosto1_251394	Auramp1_489979	Copci_AmutBmut1_437532		Mk_00934900	PleosPC15_2_1111123	Ptegra1_574725	Schco3_2625300	IPR008427::Extracellular membrane protein; CFEM domain::8										1
Cons_CM-specific	orbh_5052	0	1	4	2	2	1	4	4	4	8	6	0.75	-	Agabi_varbisH97_2_194774	Armosto1_256517	Auramp1_566240	Copci_AmutBmut1_439390		Mk_00532300	PleosPC15_2_1091172	Ptegra1_652421	Schco3_2627662	IPR008427::Extracellular membrane protein; CFEM domain::8										68
Cons_CM-specific	orbh_6143	0	0	4	0	2	4	1	4	4	6	5	0.833333	-	Agabi_varbisH97_2_195570	Armosto1_261009	Auramp1_164439	Copci_AmutBmut1_485770			PleosPC15_2_1080027		Schco3_2629146	IPR035992::Ricin B-like lectins::6	IPR000772::Ricin B; lectin domain::5									38
Cons_CM-specific	orbh_6613	0	1	4	0	0	0	4	4	4	5	4	0.8	-	Agabi_varbisH97_2_139293	Armosto1_269891		Copci_AmutBmut1_444892			PleosPC15_2_1044883	Ptegra1_571773		IPR001338::Hydrophobin::5
Cons_CM-specific	orbh_5120	0	4	4	4	4	4	4	4	4	8	8	1	-	Agabi_varbisH97_2_76039	Armosto1_253435	Auramp1_505892	Copci_AmutBmut1_186809		Mk_01237300	PleosPC15_2_1085281	Ptegra1_556850	Schco3_59174	IPR018824::Conidiation-specific protein 6::8										123	SPAC11D3.01c_pombe			Con-6 family conserved fungal protein
Cons_CM-specific	orbh_3647	0	2	4	4	4	2	4	4	4	8	8	1	-	Agabi_varbisH97_2_139213	Armosto1_272275	Auramp1_482955	Copci_AmutBmut1_502321		Mk_01005100	PleosPC15_2_1072937	Ptegra1_575038	Schco3_2630008	IPR000757::Glycoside hydrolase family 16::8	IPR013320::Concavalin A-like lectin/glucase domain superfamily::8									167	NCU09904_Neucr
Cons_CM-specific	orbh_3840	0	2	4	4	4	4	4	2	4	8	8	1	-	Agabi_varbisH97_2_184510	Armosto1_261873	Auramp1_424621	Copci_AmutBmut1_467907		Mk_00063800	PleosPC15_2_1103266	Ptegra1_541772	Schco3_2575954	IPR036908::RlpA-like domain superfamily::8	IPR009009::RlpA-like protein; double-psi beta-barrel domain::3									119
Cons_CM-specific	orbh_4344	0	2	4	2	2	2	4	4	4	8	8	1	-	Agabi_varbisH97_2_205540	Armosto1_258952	Auramp1_550553	Copci_AmutBmut1_505989		Mk_00871400	PleosPC15_2_1043147	Ptegra1_287608	Schco3_2620053	IPR017853::Glycoside hydrolase superfamily::8	IPR001547::Glycoside hydrolase; family 5::8									188	AN3777_exgB_Aspnid exgB_Aspnid	Verified ORF Protein with beta-(1;6)-glucase activity; involved in degradation of glucans
Cons_CM-specific	orbh_4412	0	2	4	2	2	2	4	4	4	8	8	1	-	Agabi_varbisH97_2_211439	Armosto1_272272	Auramp1_609118	Copci_AmutBmut1_519767		Mk_01005200	PleosPC15_2_1068875	Ptegra1_596968	Schco3_2505584	IPR001173::Glycosyltransferase 2-like::8	IPR029044::Nucleotide-diphospho-sugar transferases::8									211	NCU09906_Neucr
Cons_CM-specific	orbh_3716	0	2	4	4	4	1	4	4	4	8	7	0.875	-	Agabi_varbisH97_2_177002	Armosto1_251476	Auramp1_447319	Copci_AmutBmut1_405828		Mk_00517500	PleosPC15_2_1031764	Ptegra1_549166	Schco3_2632701	IPR037524::PA14/GLEYA domain::8	IPR036962::Glycoside hydrolase; family 3; N-termil domain superfamily::8	IPR001764::Glycoside hydrolase; family 3; N-termil::8	IPR002772::Glycoside hydrolase family 3 C-termil domain::8	IPR013783::Immunoglobulin-like fold::8	IPR036881::Glycoside hydrolase family 3 C-termil domain superfamily::8	IPR017853::Glycoside hydrolase superfamily::8	IPR026891::Fibronectin type III-like domain::8	IPR008979::Galactose-binding-like domain superfamily::8	IPR011658::PA14 domain::8	153
Cons_CM-specific	orbh_4555	0	1	4	4	2	2	4	4	4	8	7	0.875	-	Agabi_varbisH97_2_230090	Armosto1_260987	Auramp1_472311	Copci_AmutBmut1_442333		Mk_00557700	PleosPC15_2_1029861	Ptegra1_116164	Schco3_2507628	IPR036851::Chloroperoxidase-like superfamily::8	IPR000028::Chloroperoxidase::8									97
Cons_CM-specific	orbh_5263	0	2	4	4	2	0	4	4	4	7	7	1	-	Agabi_varbisH97_2_138819	Armosto1_262521	Auramp1_539020	Copci_AmutBmut1_451850		Mk_01133700	PleosPC15_2_1090605	Ptegra1_573799		IPR008972::Cupredoxin::7										42
Cons_CM-specific	orbh_5339	0	2	0	2	4	2	4	4	4	7	7	1	-	Agabi_varbisH97_2_188164	Armosto1_257631	Auramp1_503432	Copci_AmutBmut1_368217		Mk_01130300		Ptegra1_513425	Schco3_2706622	IPR001579::Glycosyl hydrolases family 18 (GH18) active site::7	IPR003610::Carbohydrate-binding module family 5/12::7	IPR036573::Carbohydrate-binding module superfamily 5/12::7	IPR017853::Glycoside hydrolase superfamily::7	IPR011583::Chitise II::7	IPR001223::Glycoside hydrolase family 18; catalytic domain::7	IPR029070::Chitise insertion domain superfamily::6				81
Cons_CM-specific	orbh_4117	0	1	4	4	2	2	4	2	4	8	7	0.875	-	Agabi_varbisH97_2_193549	Armosto1_271011	Auramp1_571575	Copci_AmutBmut1_417746		Mk_00918700	PleosPC15_2_1066640	Ptegra1_567365	Schco3_2616228	IPR018466::Kre9/Knh1 family::4										25
Cons_CM-specific	orbh_5641	0	1	4	4	4	4	4	0	4	7	6	0.857143	-		Armosto1_253440	Auramp1_550991	Copci_AmutBmut1_479688		Mk_00994500	PleosPC15_2_1110336	Ptegra1_613407	Schco3_2605889	IPR000028::Chloroperoxidase::7	IPR036851::Chloroperoxidase-like superfamily::7									214	NCU11046_Neucr
Cons_CM-specific	orbh_4244	0	1	4	4	1	2	4	4	4	8	6	0.75	-	Agabi_varbisH97_2_196872	Armosto1_269023	Auramp1_486613	Copci_AmutBmut1_493990		Mk_01293400	PleosPC15_2_155750	Ptegra1_623553	Schco3_2610852	IPR019378::GDP-fucose protein O-fucosyltransferase::7										88
Cons_CM-specific	orbh_4420	0	1	4	4	2	1	4	4	4	8	6	0.75	-	Agabi_varbisH97_2_211936	Armosto1_262318	Auramp1_273535	Copci_AmutBmut1_470416		Mk_00113500	PleosPC15_2_1067912	Ptegra1_415320	Schco3_2623305	IPR017853::Glycoside hydrolase superfamily::8	IPR011583::Chitise II::8	IPR001223::Glycoside hydrolase family 18; catalytic domain::8	IPR029070::Chitise insertion domain superfamily::8	IPR001579::Glycosyl hydrolases family 18 (GH18) active site::4						134
Cons_CM-specific	orbh_4467	0	1	2	4	1	4	4	4	4	8	6	0.75	-	Agabi_varbisH97_2_217305	Armosto1_262438	Auramp1_479112	Copci_AmutBmut1_373418		Mk_00516600	PleosPC15_2_1034680	Ptegra1_577428	Schco3_2538080	IPR002772::Glycoside hydrolase family 3 C-termil domain::8	IPR001764::Glycoside hydrolase; family 3; N-termil::8	IPR036962::Glycoside hydrolase; family 3; N-termil domain superfamily::8	IPR017853::Glycoside hydrolase superfamily::8	IPR036881::Glycoside hydrolase family 3 C-termil domain superfamily::8	IPR026891::Fibronectin type III-like domain::8	IPR013783::Immunoglobulin-like fold::8				52
Cons_CM-specific	orbh_1053	1	2	4	1	2	1	4	4	4	9	6	0.75	-	Agabi_varbisH97_2_189451	Armosto1_268996	Auramp1_486503	Copci_AmutBmut1_357695	Cryne_JEC21_1_4866	Mk_01278600	PleosPC15_2_1092461	Ptegra1_603102	Schco3_2684219	IPR029044::Nucleotide-diphospho-sugar transferases::9	IPR039741::UDP-sugar pyrophosphorylase::9	IPR002618::UDPGP family::9								428	uap1_pombe AN9094_ungA_Aspnid YDL103C_QRI1_Sacce1 NCU02109_Neucr	Verified ORF Putative UDP-N-acetylglucosamine pyrophosphorylase with a predicted role in chitin biosynthesis medione stress-induced protein repressed by and starvation- and rapamycin-induced autophagy		UDP-N-acetylglucosamine diphosphorylase Uap1/Qri1(predicted)	UDP-N-acetylglucosamine pyrophosphorylase; catalyzes the formation of UDP-N-acetylglucosamine (UDP-Glcc); which is important in cell wall biosynthesis; protein N-glycosylation; and GPI anchor biosynthesis; protein abundance increases in response to D replication stress
Cons_CM-specific	orbh_5298	0	2	4	1	4	4	4	4	0	7	6	0.857143	-	Agabi_varbisH97_2_179502	Armosto1_259736	Auramp1_65557			Mk_01415200	PleosPC15_2_1061918	Ptegra1_548452	Schco3_2614029	IPR000070::Pectinesterase; catalytic::7	IPR012334::Pectin lyase fold::7	IPR011050::Pectin lyase fold/virulence factor::7	IPR033131::Pectinesterase; Asp active site::7
Cons_CM-specific	orbh_5924	0	0	4	4	4	4	2	0	4	6	6	1	-		Armosto1_250435	Auramp1_393443	Copci_AmutBmut1_540056		Mk_00653600	PleosPC15_2_28924		Schco3_2584405	IPR000757::Glycoside hydrolase family 16::6	IPR013320::Concavalin A-like lectin/glucase domain superfamily::6
Cons_CM-specific	orbh_6004	0	0	4	0	4	4	2	4	4	6	6	1	-	Agabi_varbisH97_2_210268	Armosto1_262331	Auramp1_625386	Copci_AmutBmut1_464399			PleosPC15_2_1091289		Schco3_2511288	IPR005197::Glycoside hydrolase family 71::6	IPR002889::Carbohydrate-binding WSC::6
Cons_CM-specific	orbh_6405	0	2	4	4	4	4	4	0	0	6	6	1	-		Armosto1_264815	Auramp1_399133			Mk_01081000	PleosPC15_2_159371	Ptegra1_542954	Schco3_2686544	IPR000757::Glycoside hydrolase family 16::6	IPR013320::Concavalin A-like lectin/glucase domain superfamily::6
Cons_CM-specific	orbh_5272	0	0	4	1	4	1	4	4	4	7	5	0.714286	-	Agabi_varbisH97_2_149875	Armosto1_261527	Auramp1_380309	Copci_AmutBmut1_442743		Mk_01446500	PleosPC15_2_26137		Schco3_2619343	IPR033121::Peptidase family A1 domain::7	IPR001461::Aspartic peptidase A1 family::7	IPR001969::Aspartic peptidase; active site::7	IPR021109::Aspartic peptidase domain superfamily::7	IPR034164::Pepsin-like domain::6						121
Cons_CM-specific	orbh_66391	0	0	0	4	4	4	4	4	1	6	5	0.833333	-	Agabi_varbisH97_2_200333	Armosto1_257891	Auramp1_28957	Copci_AmutBmut1_546300		Mk_01195300			Schco3_2613657	IPR017853::Glycoside hydrolase superfamily::6	IPR001547::Glycoside hydrolase; family 5::6									153	exg3_pombe			cell wall glucan 1;3-beta-glucosidase Exg3
Cons_CM-specific	orbh_66201	0	0	4	4	4	0	4	0	4	5	5	1	-		Armosto1_249955	Auramp1_503855	Copci_AmutBmut1_469460		Mk_01458300	PleosPC15_2_1042358			IPR006593::Cytochrome b561/ferric reductase transmembrane::5	IPR005018::DOMON domain::5	IPR015920::Cellobiose dehydrogese; cytochrome domain::5	IPR038697::CHD; cytochrome domain superfamily::5							112
Cons_CM-specific	orbh_4381	0	1	4	2	1	1	4	4	4	8	5	0.625	-	Agabi_varbisH97_2_208965	Armosto1_263286	Auramp1_574509	Copci_AmutBmut1_91051		Mk_00589700	PleosPC15_2_1079778	Ptegra1_549496	Schco3_59565	IPR011583::Chitise II::8	IPR017853::Glycoside hydrolase superfamily::8	IPR029070::Chitise insertion domain superfamily::8	IPR001223::Glycoside hydrolase family 18; catalytic domain::8	IPR001579::Glycosyl hydrolases family 18 (GH18) active site::7						54
Cons_CM-specific	orbh_5964	0	2	4	1	1	4	0	4	4	7	5	0.714286	-	Agabi_varbisH97_2_194914		Auramp1_396789	Copci_AmutBmut1_500301		Mk_00262800	PleosPC15_2_1095211	Ptegra1_555715	Schco3_2628713	IPR001938::Thaumatin family::7	IPR037176::Osmotin/thaumatin-like superfamily::7									95
Cons_CM-specific	orbh_66438	0	0	0	0	4	4	4	2	4	5	5	1	-	Agabi_varbisH97_2_185654	Armosto1_251060	Auramp1_472415	Copci_AmutBmut1_22054					Schco3_2630808	IPR005197::Glycoside hydrolase family 71::5										138	agn1_pombe NCU06010_Neucr			cell wall glucan endo-1;3-alpha-glucosidase Agn1
Cons_CM-specific	orbh_5828	0	1	4	4	4	1	2	4	0	7	5	0.714286	-	Agabi_varbisH97_2_201136	Armosto1_257609	Auramp1_238189			Mk_00335100	PleosPC15_2_696	Ptegra1_152189	Schco3_85210	IPR001579::Glycosyl hydrolases family 18 (GH18) active site::7	IPR017853::Glycoside hydrolase superfamily::7	IPR001223::Glycoside hydrolase family 18; catalytic domain::6	IPR003610::Carbohydrate-binding module family 5/12::5	IPR036573::Carbohydrate-binding module superfamily 5/12::5
Cons_CM-specific	orbh_66288	0	2	4	0	4	4	4	0	0	5	5	1	-		Armosto1_261719	Auramp1_395081				PleosPC15_2_50345	Ptegra1_499826	Schco3_2621806	IPR001579::Glycosyl hydrolases family 18 (GH18) active site::5	IPR011583::Chitise II::5	IPR017853::Glycoside hydrolase superfamily::5	IPR001223::Glycoside hydrolase family 18; catalytic domain::5	IPR029070::Chitise insertion domain superfamily::5
Cons_CM-specific	orbh_2233	1	1	1	4	1	4	2	4	4	9	5	0.625	-	Agabi_varbisH97_2_207097	Armosto1_270730	Auramp1_393668	Copci_AmutBmut1_493383	Cryne_JEC21_1_3064	Mk_01125800	PleosPC15_2_1078461	Ptegra1_576040	Schco3_230877	IPR007657::Glycosyltransferase 61::9										103
Cons_CM-specific	orbh_66270	0	0	4	4	0	0	2	4	4	5	5	1	-	Agabi_varbisH97_2_43698	Armosto1_264153		Copci_AmutBmut1_495335		Mk_00028600	PleosPC15_2_3756			IPR000772::Ricin B; lectin domain::1	IPR035992::Ricin B-like lectins::1									94
Cons_CM-specific	orbh_3385	0	1	2	4	2	1	1	2	4	8	5	0.625	-	Agabi_varbisH97_2_220085	Armosto1_261720	Auramp1_393843	Copci_AmutBmut1_520359		Mk_00081500	PleosPC15_2_157064	Ptegra1_589476	Schco3_2538484	IPR033433::Domain of unknown function DUF5127::7	IPR032514::Domain of unknown function DUF4965::7	IPR014870::Domain of unknown function DUF1793::7	IPR008928::Six-hairpin glycosidase superfamily::5	IPR032515::Domain of unknown function DUF4964::4	IPR001579::Glycosyl hydrolases family 18 (GH18) active site::2	IPR011583::Chitise II::2	IPR017853::Glycoside hydrolase superfamily::2	IPR001223::Glycoside hydrolase family 18; catalytic domain::2		101
Cons_CM-specific	orbh_4576	0	1	4	1	1	1	4	4	4	8	4	0.5	-	Agabi_varbisH97_2_62194	Armosto1_269035	Auramp1_566709	Copci_AmutBmut1_357863		Mk_01294400	PleosPC15_2_1102068	Ptegra1_648146	Schco3_2529062	IPR013830::SGNH hydrolase-type esterase domain::8	IPR036514::SGNH hydrolase superfamily::8									171	NCU09976_Neucr AN2528_Aspnid	Verified ORF Protein with rhamnogalacturon acetylesterase activity; involved in degradation of pectin
Cons_CM-specific	orbh_4963	0	1	1	1	4	4	4	1	4	8	4	0.5	-	Agabi_varbisH97_2_195916	Armosto1_256298	Auramp1_160389	Copci_AmutBmut1_381870		Mk_01126800	PleosPC15_2_1076482	Ptegra1_586024	Schco3_2630028	IPR013320::Concavalin A-like lectin/glucase domain superfamily::8	IPR000757::Glycoside hydrolase family 16::8									63
Cons_CM-specific	orbh_7854	0	0	4	0	4	4	0	0	4	4	4	1	-			Auramp1_483879	Copci_AmutBmut1_353931			PleosPC15_2_163804		Schco3_2668795	IPR035992::Ricin B-like lectins::4	IPR000772::Ricin B; lectin domain::3									27
Cons_CM-specific	orbh_6736	0	4	4	4	0	0	4	1	0	5	4	0.8	-	Agabi_varbisH97_2_194662	Armosto1_250501				Mk_01327800	PleosPC15_2_1079640	Ptegra1_537558		IPR021054::Cell wall mannoprotein 1::5
Cons_CM-specific	orbh_6891	0	0	4	1	4	4	4	0	0	5	4	0.8	-		Armosto1_271055	Auramp1_104749			Mk_00873700	PleosPC15_2_1088021		Schco3_2621834	IPR036908::RlpA-like domain superfamily::5	IPR010829::Cerato-platanin::5
Cons_CM-specific	orbh_7169	0	0	0	4	0	0	4	4	4	4	4	1	-	Agabi_varbisH97_2_114788	Armosto1_251825		Copci_AmutBmut1_169822		Mk_00311700				IPR000757::Glycoside hydrolase family 16::4	IPR013320::Concavalin A-like lectin/glucase domain superfamily::4
Cons_CM-specific	orbh_7746	0	4	4	0	0	0	0	4	4	4	4	1	-	Agabi_varbisH97_2_207044			Copci_AmutBmut1_438890			PleosPC15_2_1092681	Ptegra1_133693		IPR018824::Conidiation-specific protein 6::4
Cons_CM-specific	orbh_6242	0	0	4	4	1	1	4	0	4	6	4	0.666667	-		Armosto1_250974	Auramp1_105568	Copci_AmutBmut1_356026		Mk_01423200	PleosPC15_2_1089630		Schco3_2622012	IPR008972::Cupredoxin::6										69
Cons_CM-specific	orbh_5957	0	1	4	4	4	2	4	4	0	7	6	0.857143	-	Agabi_varbisH97_2_194078	Armosto1_254810	Auramp1_628228			Mk_00482100	PleosPC15_2_1088219	Ptegra1_548032	Schco3_2611511	IPR013780::Glycosyl hydrolase; all-beta::7	IPR002241::Glycoside hydrolase; family 27::7	IPR041233::Alpha galactosidase; C-termil beta sandwich domain::7	IPR013785::Aldolase-type TIM barrel::7	IPR017853::Glycoside hydrolase superfamily::7
Cons_CM-specific	orbh_5106	0	4	1	4	4	4	4	2	4	8	7	0.875	-	Agabi_varbisH97_2_210060	Armosto1_267252	Auramp1_478643	Copci_AmutBmut1_544218		Mk_00368500	PleosPC15_2_1081025	Ptegra1_546608	Schco3_2620687	IPR036908::RlpA-like domain superfamily::8	IPR010829::Cerato-platanin::8									216	ccg-14_Neucr
Cons_CM-specific	orbh_3851	0	2	1	2	4	2	2	4	4	8	7	0.875	-	Agabi_varbisH97_2_184993	Armosto1_266451	Auramp1_512732	Copci_AmutBmut1_368135		Mk_00763300	PleosPC15_2_1089723	Ptegra1_591299	Schco3_1194451	IPR002355::Multicopper oxidase; copper-binding site::8	IPR008972::Cupredoxin::8	IPR001117::Multicopper oxidase; type 1::8	IPR033138::Multicopper oxidases; conserved site::8	IPR011707::Multicopper oxidase; type 3::8	IPR011706::Multicopper oxidase; type 2::8					88
Cons_CM-specific	orbh_4437	0	2	2	2	4	2	1	4	4	8	7	0.875	-	Agabi_varbisH97_2_213401	Armosto1_258840	Auramp1_580539	Copci_AmutBmut1_377259		Mk_00049800	PleosPC15_2_1054511	Ptegra1_545695	Schco3_2557656	IPR011330::Glycoside hydrolase/deacetylase; beta/alpha-barrel::8										135
Cons_CM-specific	orbh_3836	0	1	4	4	1	1	4	4	4	8	5	0.625	-	Agabi_varbisH97_2_184273	Armosto1_253367	Auramp1_391154	Copci_AmutBmut1_375733		Mk_01211400	PleosPC15_2_1094264	Ptegra1_562555	Schco3_2669242	IPR011330::Glycoside hydrolase/deacetylase; beta/alpha-barrel::1	IPR002509::NodB homology domain::1									110
Cons_CM-specific	orbh_4035	0	2	4	4	4	2	2	4	2	8	8	1	-	Agabi_varbisH97_2_191588	Armosto1_267625	Auramp1_546767	Copci_AmutBmut1_501856		Mk_00145800	PleosPC15_2_1110177	Ptegra1_565642	Schco3_2495315	IPR041371::Glycosyl hydrolase family 92 N-termil domain::8	IPR014718::Glycoside hydrolase-type carbohydrate-binding::8	IPR008928::Six-hairpin glycosidase superfamily::8	IPR012939::Glycosyl hydrolase family 92::8	IPR005887::Alpha-1;2-mannosidase; putative::7						259	AN10672_Aspnid NCU07269_Neucr	Uncharacterized ORF Has domains with predicted carbohydrate binding; catalytic activity and role in carbohydrate metabolic process
Cons_CM-specific	orbh_4041	0	1	4	4	4	2	2	4	4	8	7	0.875	-	Agabi_varbisH97_2_191638	Armosto1_261284	Auramp1_424822	Copci_AmutBmut1_447925		Mk_00048100	PleosPC15_2_1075723	Ptegra1_311241	Schco3_2587109	IPR029063::S-adenosyl-L-methionine-dependent methyltransferase::8	IPR003333::Mycolic acid cyclopropane synthase::7									220	NCU05216_Neucr
Cons_CM-specific	orbh_4217	0	1	4	4	2	1	4	4	4	8	6	0.75	-	Agabi_varbisH97_2_195776	Armosto1_270694	Auramp1_564916	Copci_AmutBmut1_462300		Mk_00123700	PleosPC15_2_1105014	Ptegra1_543530	Schco3_2622822	IPR029058::Alpha/Beta hydrolase fold::8	IPR008758::Peptidase S28::8	IPR042269::Serine carboxypeptidase S28; SKS domain::2								238	NCU09992_Neucr
Cons_CM-specific	orbh_6341	0	0	0	4	2	4	4	4	4	6	6	1	-	Agabi_varbisH97_2_185936	Armosto1_265271	Auramp1_220597	Copci_AmutBmut1_367835		Mk_01085800			Schco3_2494345	IPR036264::Bacterial exopeptidase dimerisation domain::6	IPR011650::Peptidase M20; dimerisation domain::5	IPR017439::Amidohydrolase::4	IPR002933::Peptidase M20::4							30
Cons_CM-specific	orbh_5303	0	1	2	4	4	4	4	4	0	7	6	0.857143	-	Agabi_varbisH97_2_180408	Armosto1_263454	Auramp1_490563			Mk_00763900	PleosPC15_2_31525	Ptegra1_595510	Schco3_2501673	IPR012878::Beta-L-arabinofuranosidase; GH127::7	IPR008928::Six-hairpin glycosidase superfamily::5
Cons_CM-specific	orbh_6302	0	2	4	4	4	4	4	0	0	6	6	1	-		Armosto1_261471	Auramp1_481881			Mk_00051400	PleosPC15_2_1111989	Ptegra1_571643	Schco3_2624349	IPR018824::Conidiation-specific protein 6::6
Cons_CM-specific	orbh_3812	0	1	2	4	2	1	4	4	4	8	6	0.75	-	Agabi_varbisH97_2_183321	Armosto1_267063	Auramp1_569808	Copci_AmutBmut1_492834		Mk_01056200	PleosPC15_2_37178	Ptegra1_511791	Schco3_2482998	IPR024535::Pectate lyase superfamily protein::8	IPR011050::Pectin lyase fold/virulence factor::8	IPR012334::Pectin lyase fold::8								304	AN0779_Aspnid NCU07523_Neucr	Uncharacterized ORF Putative glucan 1;3-beta-glucosidase with a predicted role in glucan metabolism
Cons_CM-specific	orbh_3986	0	1	2	4	1	2	4	4	4	8	6	0.75	-	Agabi_varbisH97_2_190521	Armosto1_257961	Auramp1_510897	Copci_AmutBmut1_353997		Mk_01198800	PleosPC15_2_1080566	Ptegra1_29866	Schco3_1084300	IPR008972::Cupredoxin::8	IPR003245::Phytocyanin domain::2									95
Cons_CM-specific	orbh_5011	0	1	2	4	1	2	4	4	4	8	6	0.75	-	Agabi_varbisH97_2_220588	Armosto1_271049	Auramp1_50837	Copci_AmutBmut1_441442		Mk_01048100	PleosPC15_2_32139	Ptegra1_565050	Schco3_1065770	IPR008972::Cupredoxin::8										184
Cons_CM-specific	orbh_6115	0	4	2	2	2	0	2	2	0	6	6	1	-	Agabi_varbisH97_2_191068	Armosto1_257334	Auramp1_490773			Mk_00319700	PleosPC15_2_1078816	Ptegra1_544852		IPR029058::Alpha/Beta hydrolase fold::6	IPR002018::Carboxylesterase; type B::6	IPR019819::Carboxylesterase type B; conserved site::5	IPR019826::Carboxylesterase type B; active site::4
Cons_CM-specific	orbh_5832	0	1	4	4	4	1	4	2	0	7	5	0.714286	-	Agabi_varbisH97_2_67675	Armosto1_256347	Auramp1_396587			Mk_01399900	PleosPC15_2_1035754	Ptegra1_612149	Schco3_2629974	IPR036962::Glycoside hydrolase; family 3; N-termil domain superfamily::7	IPR017853::Glycoside hydrolase superfamily::7	IPR036881::Glycoside hydrolase family 3 C-termil domain superfamily::7	IPR002772::Glycoside hydrolase family 3 C-termil domain::7	IPR001764::Glycoside hydrolase; family 3; N-termil::7	IPR013783::Immunoglobulin-like fold::6	IPR026891::Fibronectin type III-like domain::6
Cons_CM-specific	orbh_1452	1	1	4	4	1	1	4	4	2	9	5	0.625	-	Agabi_varbisH97_2_192446	Armosto1_250943	Auramp1_391803	Copci_AmutBmut1_413665	Cryne_JEC21_1_6078	Mk_00048600	PleosPC15_2_1089553	Ptegra1_557143	Schco3_2631606	IPR017441::Protein kise; ATP binding site::9	IPR011009::Protein kise-like domain superfamily::9	IPR000719::Protein kise domain::9	IPR008271::Serine/threonine-protein kise; active site::8							409	AN5666_mpkA_Aspnid mak-1_Neucr YHR030C_SLT2_Sacce1 spm1_pombe MKC1_candida	Verified ORF Putative mitogen-activated protein kise (MAP kise) involved in conidial germition and polarized growth mutants arrest as branched germlings; phenotype is remediated by sucrose and Cl reduced growth on AVICEL medium			Serine/threonine MAP kise; involved in regulating maintence of cell wall integrity; cell cycle progression; and nuclear mR retention in heat shock; required for mitophagy and pexophagy; affects recruitment of mitochondria to phagophore assembly site (PAS); plays a role in adaptive response of cells to cold; regulated by the PKC1-mediated sigling pathway; SLT2 has a paralog; KDX1; that arose from …
Cons_CM-specific	orbh_6675	0	0	4	4	0	0	4	2	4	5	5	1	-	Agabi_varbisH97_2_196108	Armosto1_250145		Copci_AmutBmut1_263775		Mk_00700100	PleosPC15_2_28718			IPR015202::Galactose oxidase-like; Early set domain::5	IPR037293::Galactose oxidase; central domain superfamily::5	IPR009880::Glyoxal oxidase; N-termil::5	IPR011043::Galactose oxidase/kelch; beta-propeller::5	IPR014756::Immunoglobulin E-set::5	IPR013783::Immunoglobulin-like fold::5					128
Cons_CM-specific	orbh_6136	1	0	4	1	4	4	0	4	0	6	4	0.8	-	Agabi_varbisH97_2_194556		Auramp1_25241		Cryne_JEC21_1_1771	Mk_00800300	PleosPC15_2_1108343		Schco3_2633734	IPR026116::Glycosyltransferase family 18::6
Cons_CM-specific	orbh_7117	0	1	4	4	0	0	4	0	4	5	4	0.8	-		Armosto1_266051		Copci_AmutBmut1_441320		Mk_00592900	PleosPC15_2_1069077	Ptegra1_517029		IPR011008::Dimeric alpha-beta barrel::5	IPR006314::Dyp-type peroxidase::5									124	NCU09210_Neucr
Cons_CM-specific	orbh_3469	0	2	4	4	4	4	4	4	4	8	8	1	-	Agabi_varbisH97_2_113810	Armosto1_269504	Auramp1_486175	Copci_AmutBmut1_357717		Mk_01290200	PleosPC15_2_1111637	Ptegra1_137148	Schco3_2487084	IPR000504::R recognition motif domain::8	IPR012677::Nucleotide-binding alpha-beta plait domain superfamily::8	IPR035979::R-binding domain superfamily::8								79
Cons_CM-specific	orbh_66139	0	2	4	4	4	4	4	4	4	8	8	1	-	Agabi_varbisH97_2_194286	Armosto1_251408	Auramp1_556035	Copci_AmutBmut1_363625		Mk_01349900	PleosPC15_2_354	Ptegra1_524815	Schco3_2610765	IPR007125::Histone H2A/H2B/H3::8	IPR032454::Histone H2A; C-termil domain::8	IPR032458::Histone H2A conserved site::8	IPR002119::Histone H2A::8	IPR009072::Histone-fold::8						64	HTA1_cryptococcus				Histone H2A; core histone protein required for chromatin assembly and chromosome function; one of two nearly identical subtypes (see also HTA2); D damage-dependent phosphorylation by Mec1p facilitates D repair; acetylated by t4p; N-termilly propionylated in vivo
Cons_CM-specific	orbh_3665	0	2	2	4	4	4	4	4	4	8	8	1	-	Agabi_varbisH97_2_146084	Armosto1_252830	Auramp1_511396	Copci_AmutBmut1_545797		Mk_00537400	PleosPC15_2_174811	Ptegra1_512660	Schco3_2672639	IPR001077::O-methyltransferase domain::8	IPR029063::S-adenosyl-L-methionine-dependent methyltransferase::8	IPR016461::O-methyltransferase COMT-type::7	IPR036390::Winged helix D-binding domain superfamily::6	IPR036388::Winged helix-like D-binding domain superfamily::6						60
Cons_CM-specific	orbh_4610	0	4	4	4	2	2	4	2	2	8	8	1	-	Agabi_varbisH97_2_66714	Armosto1_253249	Auramp1_401059	Copci_AmutBmut1_459336		Mk_00687900	PleosPC15_2_1113708	Ptegra1_367786	Schco3_2519051	IPR012317::Poly(ADP-ribose) polymerase; catalytic domain::8										81
Cons_CM-specific	orbh_5030	0	4	4	2	1	2	4	4	4	8	7	0.875	-	Agabi_varbisH97_2_192723	Armosto1_250573	Auramp1_624700	Copci_AmutBmut1_457726		Mk_00143500	PleosPC15_2_1041131	Ptegra1_567074	Schco3_2634295	IPR016181::Acyl-CoA N-acyltransferase::8	IPR000182::GT domain::8									31
Cons_CM-specific	orbh_5770	0	1	4	4	2	4	4	0	4	7	6	0.857143	-		Armosto1_268158	Auramp1_458822	Copci_AmutBmut1_384835		Mk_01407600	PleosPC15_2_1101344	Ptegra1_647424	Schco3_2609443	IPR012317::Poly(ADP-ribose) polymerase; catalytic domain::7	IPR004102::Poly(ADP-ribose) polymerase; regulatory domain::7	IPR036930::WGR domain superfamily::7	IPR036616::Poly(ADP-ribose) polymerase; regulatory domain superfamily::7	IPR008893::WGR domain::7						273	parp_Neucr; prpA/AN3129	Poly(ADP-ribose) polymerase (PARP); predicted to function during the D damage response; transcript induced during asexual development and in response to the D damaging agents MMS; BLEO; 4-NQO and camptothecin
Cons_CM-specific	orbh_5915	0	1	4	4	0	4	4	2	4	7	6	0.857143	-	Agabi_varbisH97_2_154611	Armosto1_250086		Copci_AmutBmut1_498885		Mk_00713700	PleosPC15_2_173886	Ptegra1_324198	Schco3_1191033	IPR019098::Histone chaperone domain CHZ::6										86
Cons_CM-specific	orbh_6563	0	1	0	1	4	4	4	0	4	6	4	0.666667	-		Armosto1_257792	Auramp1_500659	Copci_AmutBmut1_467558		Mk_00704000		Ptegra1_599308	Schco3_2606349	IPR005818::Linker histone H1/H5; domain H15::6	IPR036388::Winged helix-like D-binding domain superfamily::6	IPR036390::Winged helix D-binding domain superfamily::6	IPR005819::Linker histone H1/H5::5							45
Cons_CM-specific	orbh_5380	0	0	4	4	2	1	4	4	4	7	6	0.857143	-	Agabi_varbisH97_2_191564	Armosto1_253366	Auramp1_400019	Copci_AmutBmut1_428431		Mk_01321500	PleosPC15_2_1012254		Schco3_2625307	IPR017930::Myb domain::7	IPR001005::SANT/Myb domain::7	IPR009057::Homeobox-like domain superfamily::7	IPR017877::Myb-like domain::2							50
Cons_CM-specific	orbh_6265	0	0	4	4	4	4	4	0	4	6	6	1	-		Armosto1_253770	Auramp1_569477	Copci_AmutBmut1_381381		Mk_01099000	PleosPC15_2_159146		Schco3_2563894	IPR008936::Rho GTPase activation protein::6	IPR000198::Rho GTPase-activating protein domain::6									2
Cons_CM-specific	orbh_4250	0	4	2	4	4	2	4	2	2	8	8	1	-	Agabi_varbisH97_2_197124	Armosto1_268938	Auramp1_564523	Copci_AmutBmut1_538409		Mk_01257200	PleosPC15_2_1011932	Ptegra1_195276	Schco3_2621560	IPR032675::Leucine-rich repeat domain superfamily::5	IPR001810::F-box domain::3									78
Cons_CM-specific	orbh_5074	0	1	4	4	1	4	4	2	4	8	6	0.75	-	Agabi_varbisH97_2_116022	Armosto1_269502	Auramp1_518836	Copci_AmutBmut1_499871		Mk_01047200	PleosPC15_2_1110547	Ptegra1_598793	Schco3_2523093	IPR001810::F-box domain::8	IPR036047::F-box-like domain superfamily::8									59
Cons_CM-specific	orbh_5614	0	2	4	4	1	4	4	0	4	7	6	0.857143	-		Armosto1_250449	Auramp1_252406	Copci_AmutBmut1_195058		Mk_01095900	PleosPC15_2_1104462	Ptegra1_567251	Schco3_2673018	IPR001810::F-box domain::5										23
Cons_CM-specific	orbh_5587	0	0	2	4	2	1	4	4	4	7	6	0.857143	-	Agabi_varbisH97_2_72374	Armosto1_270778	Auramp1_401571	Copci_AmutBmut1_145676		Mk_00929100	PleosPC15_2_1094155		Schco3_2616042	IPR001810::F-box domain::7	IPR032675::Leucine-rich repeat domain superfamily::7									76
Cons_CM-specific	orbh_6258	0	1	4	4	2	4	4	0	0	6	5	0.833333	-		Armosto1_253067	Auramp1_491790			Mk_00689800	PleosPC15_2_1090299	Ptegra1_470652	Schco3_2642909	IPR001810::F-box domain::1	IPR036047::F-box-like domain superfamily::1
Cons_CM-specific	orbh_6201	0	1	4	4	0	0	4	2	4	6	5	0.833333	-	Agabi_varbisH97_2_228181	Armosto1_252082		Copci_AmutBmut1_457227		Mk_00113700	PleosPC15_2_1114462	Ptegra1_565987		IPR032675::Leucine-rich repeat domain superfamily::5	IPR001810::F-box domain::3									29
Cons_CM-specific	orbh_7206	0	0	0	0	4	4	0	4	4	4	4	1	-	Agabi_varbisH97_2_181963		Auramp1_533689	Copci_AmutBmut1_501200					Schco3_2177413	IPR001810::F-box domain::2	IPR032675::Leucine-rich repeat domain superfamily::2									90
Cons_CM-specific	orbh_5114	0	1	4	4	1	1	1	4	4	8	4	0.5	-	Agabi_varbisH97_2_143530	Armosto1_258965	Auramp1_476498	Copci_AmutBmut1_375673		Mk_00865400	PleosPC15_2_1057052	Ptegra1_506405	Schco3_2619908	IPR001810::F-box domain::4	IPR036047::F-box-like domain superfamily::4									13
Cons_CM-specific	orbh_216	1	2	2	2	1	1	4	4	4	9	6	0.75	-	Agabi_varbisH97_2_123337	Armosto1_252587	Auramp1_541612	Copci_AmutBmut1_354442	Cryne_JEC21_1_5283	Mk_00517000	PleosPC15_2_1068330	Ptegra1_516436	Schco3_2643965	IPR039261::Ferredoxin-DP reductase (FNR); nucleotide-binding domain::8	IPR013112::FAD-binding 8::8	IPR013130::Ferric reductase transmembrane component-like domain::8	IPR017927::FAD-binding domain; ferredoxin reductase-type::8	IPR017938::Riboflavin synthase-like beta-barrel::8	IPR013121::Ferric reductase; D binding domain::6					133	YOL152W_FRE7_Sacce1				Putative ferric reductase with similarity to Fre2p; expression induced by low copper levels
Cons_CM-specific	orbh_3847	0	1	4	4	1	1	4	2	4	8	5	0.625	-	Agabi_varbisH97_2_184735	Armosto1_261708	Auramp1_479518	Copci_AmutBmut1_492962		Mk_00081400	PleosPC15_2_44517	Ptegra1_630454	Schco3_2621816	IPR005101::Cryptochrome/D photolyase; FAD-binding domain::8	IPR006050::D photolyase; N-termil::8	IPR036134::Cryptochrome/D photolyase; FAD-binding domain-like superfamily::8	IPR014729::Rossmann-like alpha/beta/alpha sandwich fold::8	IPR036155::Cryptochrome/photolyase; N-termil domain superfamily::8	IPR018394::Cryptochrome/D photolyase class 1; conserved site; C-termil::7					326	AN0387_cryA_Aspnid YOR386W_PHR1_Sacce1	Verified ORF Cryptochrome; nuclearly-localized protein that senses UVA and blue light and represses sexual development by regulating other regulators such as VeA; NsdD; and RosA member of the class I cyclobutane pyrimidine dimer (CPD) photolyase family			D photolyase involved in photoreactivation; repairs pyrimidine dimers in the presence of visible light; induced by D damage; regulated by transcriptiol repressor Rph1p
Cons_CM-specific	orbh_4510	0	1	4	2	2	4	4	2	4	8	7	0.875	-	Agabi_varbisH97_2_223653	Armosto1_270885	Auramp1_407184	Copci_AmutBmut1_365330		Mk_00914400	PleosPC15_2_1040411	Ptegra1_565888	Schco3_2616150	IPR029063::S-adenosyl-L-methionine-dependent methyltransferase::8	IPR003333::Mycolic acid cyclopropane synthase::5									121
Cons_CM-specific	orbh_6212	0	0	4	4	4	4	0	1	4	6	5	0.833333	-	Agabi_varbisH97_2_61246		Auramp1_551143	Copci_AmutBmut1_376602		Mk_00499000	PleosPC15_2_1095851		Schco3_2517392	IPR007736::Caleosin-related::6										224	AN8591_Aspnid NCU09043_Neucr	Uncharacterized ORF Has domains with predicted calcium ion binding activity
Cons_CM-specific	orbh_5056	0	1	4	1	4	1	4	2	4	8	5	0.625	-	Agabi_varbisH97_2_139121	Armosto1_269065	Auramp1_618757	Copci_AmutBmut1_441540		Mk_00671900	PleosPC15_2_1108685	Ptegra1_553694	Schco3_2641759	IPR036514::SGNH hydrolase superfamily::8	IPR001087::GDSL lipase/esterase::7									247	NCU06364_Neucr AN1792_Aspnid	Uncharacterized ORF Has domains with predicted hydrolase activity; hydrolase activity; acting on ester bonds activity and role in lipid metabolic process
Cons_CM-specific	orbh_5675	0	2	4	4	4	4	4	0	4	7	7	1	-		Armosto1_257750	Auramp1_459440	Copci_AmutBmut1_380219		Mk_01189700	PleosPC15_2_1052550	Ptegra1_556826	Schco3_2606333	IPR036938::Phosphatidic acid phosphatase type 2/haloperoxidase superfamily::7	IPR043216::Phospholipid phosphatase::7	IPR000326::Phosphatidic acid phosphatase type 2/haloperoxidase::7								171	NCU09692_Neucr
Cons_CM-specific	orbh_3989	0	1	4	1	2	2	4	4	2	8	6	0.75	-	Agabi_varbisH97_2_190572	Armosto1_257898	Auramp1_500823	Copci_AmutBmut1_354296		Mk_01194100	PleosPC15_2_1052049	Ptegra1_557121	Schco3_2606113	IPR004838::Aminotransferases; class-I; pyridoxal-phosphate-binding site::8	IPR004839::Aminotransferase; class I/classII::8	IPR015421::Pyridoxal phosphate-dependent transferase; major domain::8	IPR000796::Aspartate/other aminotransferase::8	IPR015422::Pyridoxal phosphate-dependent transferase domain 1::8	IPR015424::Pyridoxal phosphate-dependent transferase::8					410	aat2_pombe AN6048_Aspnid NCU07941_Neucr YLR027C_AAT2_Sacce1	Verified ORF Putative aspartate transamise with a predicted role in amino acid metabolism palA-dependent expression independent of pH induced by carbon starvation-induced autophagy			Cytosolic aspartate aminotransferase involved in nitrogen metabolism; localizes to peroxisomes in oleate-grown cells
Cons_CM-specific	orbh_1782	1	1	4	4	1	1	4	4	2	9	5	0.625	-	Agabi_varbisH97_2_195230	Armosto1_254304	Auramp1_495427	Copci_AmutBmut1_437261	Cryne_JEC21_1_6104	Mk_01143500	PleosPC15_2_1059065	Ptegra1_550681	Schco3_2752336	IPR000873::AMP-dependent synthetase/ligase::9	IPR020845::AMP-binding; conserved site::7	IPR042099::AMP-dependent synthetase-like superfamily::5								351	YOR317W_FAA1_Sacce1 NCU04380_Neucr lcf2_pombe			long-chain-fatty-acid-CoA ligase	Long chain fatty acyl-CoA synthetase; activates imported fatty acids with a preference for C12:0-C16:0 chain lengths; functions in long chain fatty acid import; accounts for most acyl-CoA synthetase activity; localized to lipid particles; involved in sphingolipid-to-glycerolipid metabolism; forms ER foci upon D replication stress; FAA1 has a paralog; FAA4; that arose from the whole genome duplica…
Cons_CM-specific	orbh_4295	0	1	4	2	4	4	4	2	4	8	7	0.875	-	Agabi_varbisH97_2_201274	Armosto1_257384	Auramp1_498123	Copci_AmutBmut1_539004		Mk_00321200	PleosPC15_2_52286	Ptegra1_570961	Schco3_2695496	IPR010721::Protein of unknown function DUF1295::8	IPR001104::3-oxo-5-alpha-steroid 4-dehydrogese; C-termil::3									254	NCU10010_Neucr AN2404_Aspnid	Uncharacterized ORF
Cons_CM-specific	orbh_2717	1	1	4	2	2	1	4	4	4	9	6	0.75	-	Agabi_varbisH97_2_50291	Armosto1_253353	Auramp1_513659	Copci_AmutBmut1_43445	Cryne_JEC21_1_3402	Mk_00745500	PleosPC15_2_1065748	Ptegra1_567319	Schco3_2603898	IPR008949::Isoprenoid synthase domain superfamily::9	IPR002060::Squalene/phytoene synthase::9	IPR019845::Squalene/phytoene synthase; conserved site::9	IPR033904::Trans-Isoprenyl Diphosphate Synthases; head-to-head::9	IPR006449::Squalene synthase-like::8						419	NCU06054_Neucr ERG9_ustilago AN10396_Aspnid YHR190W_ERG9_Sacce1 erg9_pombe	Uncharacterized ORF Orthologs have farnesyl-diphosphate farnesyltransferase activity; squalene synthase activity and role in ergosterol biosynthetic process; establishment or maintence of cell polarity		farnesyldiphosphate:farnesyldiphosphatefarnesyltransferase (squalene synthase) Erg9	Farnesyl-diphosphate farnesyl transferase (squalene synthase); joins two farnesyl pyrophosphate moieties to form squalene in the sterol biosynthesis pathway
Cons_CM-specific	orbh_2123	1	1	4	4	2	1	2	4	4	9	6	0.75	-	Agabi_varbisH97_2_203434	Armosto1_261397	Auramp1_482129	Copci_AmutBmut1_372300	Cryne_JEC21_1_333	Mk_00052400	PleosPC15_2_1040003	Ptegra1_576296	Schco3_2624580	IPR004299::Membrane bound O-acyl transferase; MBOAT::9										416	ale1_pombe YOR175C_ALE1_Sacce1 NCU06194_Neucr			membrane bound O-acyltransferase; MBOAT Ale1 (predicted)	Broad-specificity lysophospholipid acyltransferase; part of MBOAT family of membrane-bound O-acyltransferases; key component of Lands cycle; may have role in fatty acid exchange at sn-2 position of mature glycerophospholipids
Cons_CM-specific	orbh_67197	0	0	4	0	0	0	4	4	4	4	4	1	-	Agabi_varbisH97_2_187622	Armosto1_271969		Copci_AmutBmut1_422976			PleosPC15_2_1051856			IPR005804::Fatty acid desaturase domain::4
Cons_CM-specific	orbh_172	1	1	4	1	2	2	4	2	4	9	6	0.75	-	Agabi_varbisH97_2_121645	Armosto1_254322	Auramp1_548120	Copci_AmutBmut1_444758	Cryne_JEC21_1_5615	Mk_01149400	PleosPC15_2_1048295	Ptegra1_550817	Schco3_2639451	IPR007318::Phospholipid methyltransferase::9	IPR016219::Phosphatidylethanolamine N-methyltransferase; fungi::9									407	cho2_Aspnig CHO2_blastomyces cho2_penmarneffei cho2_pombe YGR157W_CHO2_Sacce1			phosphatidylethanolamine N-methyltransferase Cho2	Phosphatidylethanolamine methyltransferase (PEMT); catalyzes the first step in the conversion of phosphatidylethanolamine to phosphatidylcholine during the methylation pathway of phosphatidylcholine biosynthesis
Cons_CM-specific	orbh_698	1	2	2	1	1	2	4	2	4	9	6	0.75	-	Agabi_varbisH97_2_182862	Armosto1_265336	Auramp1_537252	Copci_AmutBmut1_377789	Cryne_JEC21_1_5438	Mk_00524100	PleosPC15_2_38231	Ptegra1_609989	Schco3_2645059	IPR003817::Phosphatidylserine decarboxylase-related::9	IPR033177::Phosphatidylserine decarboxylase::9	IPR033661::Phosphatidylserine decarboxylase; eukaryotic type 1::9								419	PSD1_Neucr YNL169C_PSD1_Sacce1 AN0910_Aspnid PSD1_candida psd1_pombe	Uncharacterized ORF Putative phosphatidylserine decarboxylase with a predicted role in phospholipid metabolism expression reduced after exposure to farnesol		phosphatidylserine decarboxylase Psd1	Phosphatidylserine decarboxylase of the mitochondrial inner membrane; converts phosphatidylserine to phosphatidylethanolamine; regulates mitochondrial fusion and morphology by affecting lipid mixing in the mitochondrial membrane and by influencing the ratio of long to short forms of Mgm1p; partly exposed to the mitochondrial intermembrane space
Cons_CM-specific	orbh_6601	0	1	4	0	4	0	0	4	4	5	4	0.8	-	Agabi_varbisH97_2_122706		Auramp1_565055	Copci_AmutBmut1_470387			PleosPC15_2_1089150	Ptegra1_571808		IPR001283::Cysteine-rich secretory protein-related::5	IPR035940::CAP superfamily::5	IPR014044::CAP domain::5	IPR034120::Pry1-like; SCP domain::3							291	AN10057_Aspnid YJL079C_PRY1_Sacce1 Candida_RBE1	Uncharacterized ORF Orthologs have cholesterol binding activity; role in pathogenesis and cell surface; extracellular region; extracellular vesicle; yeast-form cell wall localization	Pry family cell wall protein; Rim101; Efg1; Ssn6; alkaline repressed; O-glycosylation; no GPI anchor predicted; ketocozol induced; regulated by Sef1; Sfu1; Hap4; flow model biofilm induced; rat catheter and Spider biofilm repressed		Sterol binding protein involved in the export of acetylated sterols; secreted glycoprotein and member of the CAP protein superfamily (cysteine-rich secretory proteins (CRISP); antigen 5; and pathogenesis related 1 proteins); sterol export function is redundant with that of PRY2; may be involved in detoxification of hydrophobic compounds; PRY1 has a paralog; PRY2; that arose from the whole genome …
Cons_CM-specific	orbh_5196	0	2	4	0	2	4	4	1	4	7	6	0.857143	-	Agabi_varbisH97_2_114710	Armosto1_264581	Auramp1_473575	Copci_AmutBmut1_501720			PleosPC15_2_1101179	Ptegra1_536795	Schco3_2750212	IPR002654::Glycosyl transferase; family 25::6										82
Cons_CM-specific	orbh_1358	1	1	4	4	2	1	2	4	4	9	6	0.75	-	Agabi_varbisH97_2_191824	Armosto1_261796	Auramp1_545289	Copci_AmutBmut1_355051	Cryne_JEC21_1_2356	Mk_00097900	PleosPC15_2_1038533	Ptegra1_500403	Schco3_2500392	IPR006634::TRAM/LAG1/CLN8 homology domain::9	IPR016439::Sphingosine N-acyltransferase Lag1/Lac1-like::9	IPR013599::TRAM1-like protein::7								402	lag1_pombe NCU02468_Neucr AN4332_barA_Aspnid	Verified ORF Acyl-CoA-dependent ceramide synthase mutants show hyphal morphology defects and an increase in transition from asexual to sexual development however; cleistothecia maturation and ascospore production is delayed		sphingosine N-acyltransferase Lag1
Cons_CM-specific	orbh_4114	0	1	2	4	2	4	4	2	4	8	7	0.875	-	Agabi_varbisH97_2_193499	Armosto1_265470	Auramp1_483427	Copci_AmutBmut1_359052		Mk_00308000	PleosPC15_2_1107711	Ptegra1_532590	Schco3_1172535	IPR029058::Alpha/Beta hydrolase fold::8	IPR002921::Fungal lipase-like domain::8									232	AN8046_Aspnid faeA_Aspnig	Uncharacterized ORF Putative triacylglycerol lipase with a predicted role in glycerolipid metabolism
Cons_CM-specific	orbh_5299	0	1	0	4	1	1	4	4	4	7	4	0.571429	-	Agabi_varbisH97_2_179952	Armosto1_256224	Auramp1_504893	Copci_AmutBmut1_445665		Mk_00597100		Ptegra1_657954	Schco3_2636358	IPR032675::Leucine-rich repeat domain superfamily::7										76
Cons_CM-specific	orbh_6501	0	1	4	4	0	0	1	4	4	6	4	0.666667	-	Agabi_varbisH97_2_118563	Armosto1_265295		Copci_AmutBmut1_479805		Mk_00875500	PleosPC15_2_172126	Ptegra1_594700		IPR032675::Leucine-rich repeat domain superfamily::2										30
Cons_CM-specific	orbh_6754	0	1	4	4	0	0	4	0	4	5	4	0.8	-		Armosto1_252453		Copci_AmutBmut1_166096		Mk_00505000	PleosPC15_2_1114425	Ptegra1_656744		IPR032675::Leucine-rich repeat domain superfamily::1										36
Cons_CM-specific	orbh_3972	0	2	4	4	1	2	4	4	4	8	7	0.875	-	Agabi_varbisH97_2_190198	Armosto1_255619	Auramp1_462606	Copci_AmutBmut1_439045		Mk_00949700	PleosPC15_2_20533	Ptegra1_609169	Schco3_2662127	IPR036915::Cyclin-like superfamily::8	IPR006671::Cyclin; N-termil::8	IPR013763::Cyclin-like::3								89
Cons_CM-specific	orbh_3943	0	1	4	2	1	1	4	4	4	8	5	0.625	X	Agabi_varbisH97_2_189493	Armosto1_268978	Auramp1_570866	Copci_AmutBmut1_413970		Mk_01261200	PleosPC15_2_1111739	Ptegra1_499116	Schco3_2613571	IPR010816::Heterokaryon incompatibility Het-C::8										147	AN9067_tinC_Aspnid; N. crassa (NCU03125	Uncharacterized ORF Protein identified by two-hybrid interaction with NimA kise TinC is cytoplasmic throughout interphase and is also present in nuclei during mitosis
Cons_CM-specific	orbh_3626	0	1	4	4	4	2	4	2	4	8	7	0.875	-	Agabi_varbisH97_2_135451	Armosto1_262002	Auramp1_113332	Copci_AmutBmut1_365564		Mk_00070800	PleosPC15_2_26000	Ptegra1_181819	Schco3_2623455	IPR000571::Zinc finger; CCCH-type::7										105
Cons_CM-specific	orbh_2263	1	2	4	4	4	4	4	2	4	9	8	1	X	Agabi_varbisH97_2_208219	Armosto1_251720	Auramp1_404257	Copci_AmutBmut1_439328	Cryne_JEC21_1_2350	Mk_01131900	PleosPC15_2_1035208	Ptegra1_506674	Schco3_2463645	IPR041247::Rad52 family::9	IPR042525::D repair protein Rad52/59/22 superfamily::9	IPR007232::D repair protein Rad52/59/22::9								15
Cons_CM-specific	orbh_2253	1	1	4	2	4	4	2	4	4	9	7	0.875	X	Agabi_varbisH97_2_207951	Armosto1_251519	Auramp1_548632	Copci_AmutBmut1_267343	Cryne_JEC21_1_2280	Mk_00452400	PleosPC15_2_1035085	Ptegra1_501993	Schco3_2052819	IPR006084::XPG/Rad2 endonuclease::9	IPR032641::Exonuclease 1::9	IPR008918::Helix-hairpin-helix motif; class 2::9	IPR036279::5'-3' exonuclease; C-termil domain superfamily::9	IPR029060::PIN-like domain superfamily::9	IPR006086::XPG-I domain::8	IPR006085::XPG; N-termil::8	IPR037315::Exonuclease-1; H3TH domain::6	IPR019974::XPG conserved site::6		44
Cons_CM-specific	orbh_3624	0	1	4	4	4	4	4	2	4	8	7	0.875	X	Agabi_varbisH97_2_135213	Armosto1_262118	Auramp1_394047	Copci_AmutBmut1_439612		Mk_00067000	PleosPC15_2_1103085	Ptegra1_531837	Schco3_2498538	IPR036157::dUTPase-like superfamily::8	IPR029054::dUTPase-like::8	IPR008181::Deoxyuridine triphosphate nucleotidohydrolase::8	IPR033704::dUTPase; trimeric::8							394	SPAC644.05c_pombe YBR252W_DUT1_Sacce1 DUT1_candida		dUTP pyrophosphatase; cell-cycle regulated if expressed in S. cerevisiae; upstream MluI and SCB elements; 17-beta-estradiol; ethynyl estradiol; macrophage induced; decreased in statiory phase yeast; rat catheter; Spider biofilm repressed	deoxyuridine 5prime-triphosphate nucleotidohydrolase (predicted)	deoxyuridine triphosphate diphosphatase (dUTPase); catalyzes hydrolysis of dUTP to dUMP and PPi; thereby preventing incorporation of uracil into D during replication; critical for the maintence of genetic stability; also has diphosphatase activity on deoxyinosine triphosphate
Cons_CM-specific	orbh_3924	0	1	4	4	4	4	4	2	4	8	7	0.875	X	Agabi_varbisH97_2_189222	Armosto1_257322	Auramp1_563668	Copci_AmutBmut1_539797		Mk_00199300	PleosPC15_2_1102535	Ptegra1_561392	Schco3_2634447	IPR027329::TPX2; C-termil::8										11
Cons_CM-specific	orbh_143	1	1	4	4	4	2	4	2	4	9	7	0.875	X	Agabi_varbisH97_2_119677	Armosto1_271253	Auramp1_571683	Copci_AmutBmut1_374638	Cryne_JEC21_1_2424	Mk_01481300	PleosPC15_2_160303	Ptegra1_437672	Schco3_2570532	IPR001650::Helicase; C-termil::9	IPR032284::ATP-dependent D helicase RecQ; zinc-binding domain::9	IPR011545::DEAD/DEAH box helicase domain::9	IPR014001::Helicase superfamily 1/2; ATP-binding domain::9	IPR027417::P-loop containing nucleoside triphosphate hydrolase::9	IPR004589::D helicase; ATP-dependent; RecQ type::8					299
Cons_CM-specific	orbh_2909	1	1	4	4	2	2	4	4	4	9	7	0.875	X	Agabi_varbisH97_2_71819	Armosto1_265415	Auramp1_513425	Copci_AmutBmut1_471912	Cryne_JEC21_1_2102	Mk_01089100	PleosPC15_2_1057119	Ptegra1_561406	Schco3_2232065	IPR027417::P-loop containing nucleoside triphosphate hydrolase::9	IPR008921::D polymerase III; clamp loader complex; gamma/delta/delta subunit; C-termil::9	IPR003593::AAA+ ATPase domain::9	IPR013748::Replication factor C; C-termil::9	IPR003959::ATPase; AAA-type; core::9						420	rfc3_pombe AN8064_Aspnid YNL290W_RFC3_Sacce1 NCU08427_Neucr	Uncharacterized ORF Orthologs have ATPase activity; D clamp loader activity and role in D strand elongation involved in D replication; UV-damage excision repair; leading strand elongation		D replication factor C complex subunit Rfc3	Subunit of heteropentameric Replication factor C (RF-C); which is a D binding protein and ATPase that acts as a clamp loader of the proliferating cell nuclear antigen (PC) processivity factor for D polymerases delta and epsilon; relocalizes to the cytosol in response to hypoxia
Cons_CM-specific	orbh_621	1	1	4	4	2	2	4	4	4	9	7	0.875	X	Agabi_varbisH97_2_181051	Armosto1_257841	Auramp1_454583	Copci_AmutBmut1_436798	Cryne_JEC21_1_1438	Mk_00212500	PleosPC15_2_1066398	Ptegra1_573442	Schco3_2503832	IPR014001::Helicase superfamily 1/2; ATP-binding domain::9	IPR001650::Helicase; C-termil::9	IPR027417::P-loop containing nucleoside triphosphate hydrolase::9	IPR000330::SNF2-related; N-termil domain::9	IPR038718::SNF2-like; N-termil domain superfamily::7						400	AN1024_Aspnid crf5-1_Neucr YFR038W_IRC5_Sacce1	Uncharacterized ORF Has domains with predicted SUMO transferase activity; zinc ion binding activity			Putative ATPase containing the DEAD/H helicase-related sequence motif; null mutant displays increased levels of spontaneous Rad52p foci
Cons_CM-specific	orbh_3742	0	1	2	4	4	2	4	2	4	8	7	0.875	X	Agabi_varbisH97_2_178771	Armosto1_258919	Auramp1_510290	Copci_AmutBmut1_292223		Mk_01094900	PleosPC15_2_159560	Ptegra1_604090	Schco3_1285948	IPR021622::Afadin/alpha-actinin-binding::8										87
Cons_CM-specific	orbh_5857	0	0	4	1	4	4	2	2	4	7	6	0.857143	X	Agabi_varbisH97_2_194453	Armosto1_255006	Auramp1_505108	Copci_AmutBmut1_369486		Mk_00581700	PleosPC15_2_1068826		Schco3_2513276	IPR026122::Helicase MOV-10::7	IPR041679::D2/M7 helicase-like; C-termil::6	IPR027417::P-loop containing nucleoside triphosphate hydrolase::6	IPR003604::Matrin/U1-C-like; C2H2-type zinc finger::4	IPR041677::D2/M7 helicase; helicase domain::4	IPR013087::Zinc finger C2H2-type::3	IPR036236::Zinc finger C2H2 superfamily::3	IPR000571::Zinc finger; CCCH-type::2	IPR022755::Zinc finger; double-stranded R binding::2		82	AN0646_Aspnid	Uncharacterized ORF
Cons_CM-specific	orbh_6296	0	0	2	2	4	4	4	0	4	6	6	1	X		Armosto1_258373	Auramp1_550637	Copci_AmutBmut1_464852		Mk_01045000	PleosPC15_2_1080440		Schco3_2661944	IPR012340::Nucleic acid-binding; OB-fold::6	IPR011564::Telomeric single stranded D binding POT1/Cdc13::4	IPR028389::Protection of telomeres protein 1::4	IPR032042::Protection of telomeres protein 1; ssD-binding domain::3							23
Cons_CM-specific	orbh_513	1	1	4	4	4	1	4	1	4	9	5	0.625	X	Agabi_varbisH97_2_154568	Armosto1_250152	Auramp1_546779	Copci_AmutBmut1_448884	Cryne_JEC21_1_849	Mk_00710000	PleosPC15_2_1041188	Ptegra1_502330	Schco3_1148169	IPR013497::D topoisomerase; type IA; central::9	IPR006171::TOPRIM domain::9	IPR013826::D topoisomerase; type IA; central region; subdomain 3::9	IPR013824::D topoisomerase; type IA; central region; subdomain 1::9	IPR003602::D topoisomerase; type IA; D-binding domain::9	IPR023405::D topoisomerase; type IA; core domain::9	IPR003601::D topoisomerase; type IA; domain 2::9	IPR034144::D topoisomerase 3-like; TOPRIM domain::9	IPR023406::D topoisomerase; type IA; active site::9	IPR000380::D topoisomerase; type IA::9	427	YLR234W_TOP3_Sacce1 top3_pombe NCU00081_Neucr AN4555_Aspnid	Uncharacterized ORF Orthologs have role in maintence of rD; mitotic D replication; postreplication repair and RecQ family helicase-topoisomerase III complex; nucleus; site of double-strand break localization		D topoisomerase III	D Topoisomerase III; conserved protein that functions in a complex with Sgs1p and Rmi1p to relax single-stranded negatively-supercoiled D preferentially; D catetion/decatetion activity stimulated by RPA and Sgs1p-Top2p-Rmi1p; involved in telomere stability and regulation of mitotic recombition
Cons_CM-specific	orbh_4436	0	2	4	4	4	4	4	4	4	8	8	1	X	Agabi_varbisH97_2_213339	Armosto1_264140	Auramp1_465902	Copci_AmutBmut1_378537		Mk_00985600	PleosPC15_2_1054594	Ptegra1_591135	Schco3_2706962	IPR001313::Pumilio R-binding repeat::8	IPR033133::Pumilio homology domain::8	IPR016024::Armadillo-type fold::8	IPR011989::Armadillo-like helical::8							295	NCU01760_Neucr mcp2_pombe
Cons_CM-specific	orbh_2297	1	1	4	4	2	2	4	4	2	9	7	0.875	-	Agabi_varbisH97_2_209568	Armosto1_253785	Auramp1_484578	Copci_AmutBmut1_492739	Cryne_JEC21_1_4256	Mk_00232600	PleosPC15_2_1080378	Ptegra1_602328	Schco3_2628339	IPR003701::D double-strand break repair protein Mre11::9	IPR041796::Mre11 nuclease; N-termil metallophosphatase domain::9	IPR007281::Mre11; D-binding::9	IPR004843::Calcineurin-like phosphoesterase domain; ApaH type::9	IPR038487::Mre11; D-binding domain superfamily::9	IPR029052::Metallo-dependent phosphatase-like::8					419	rad32_pombe YMR224C_MRE11_Sacce1 AN0556_mreA_Aspnid	Verified ORF Putative D repair protein plays a role in the mitotic checkpoint in response to D damaging agents transcript induced in response to D damaging agents required for normal meiosis and ascospore viability			Nuclease subunit of the MRX complex with Rad50p and Xrs2p; complex functions in repair of D double-strand breaks and in telomere stability; Mre11p associates with Ser/Thr-rich ORFs in premeiotic phase; nuclease activity required for MRX function; widely conserved; forms nuclear foci upon D replication stress
Cons_CM-specific	orbh_4660	0	2	4	4	4	4	4	4	4	8	8	1	-	Agabi_varbisH97_2_74558	Armosto1_254840	Auramp1_576476	Copci_AmutBmut1_471238		Mk_00170800	PleosPC15_2_1098260	Ptegra1_205308	Schco3_2691558	IPR012677::Nucleotide-binding alpha-beta plait domain superfamily::8	IPR035979::R-binding domain superfamily::8	IPR000504::R recognition motif domain::8								7
Cons_CM-specific	orbh_1705	1	2	4	4	4	4	4	2	4	9	8	1	X	Agabi_varbisH97_2_194588	Armosto1_256288	Auramp1_571745	Copci_AmutBmut1_533614	Cryne_JEC21_1_826	Mk_00612400	PleosPC15_2_35803	Ptegra1_513063	Schco3_2513192	IPR006671::Cyclin; N-termil::9	IPR004367::Cyclin; C-termil domain::9	IPR036915::Cyclin-like superfamily::9	IPR013763::Cyclin-like::9	IPR039361::Cyclin::9						406	CLB2_candida cdc13_pombe YPR119W_CLB2_Sacce1 AN3648_nimE_Aspnid NCU02758_Neucr	Verified ORF B-type cyclin; mitosis-specific cyclin required for G2-M transition regulates activity of cyclin-dependent protein kise NimX		G2/M B-type cyclin Cdc13	B-type cyclin involved in cell cycle progression; activates Cdc28p to promote the transition from G2 to M phase; accumulates during G2 and M; then targeted via a destruction box motif for ubiquitin-mediated degradation by the proteasome; CLB2 has a paralog; CLB1; that arose from the whole genome duplication
Cons_CM-specific	orbh_3485	0	1	4	4	4	4	2	2	2	8	7	0.875	-	Agabi_varbisH97_2_115101	Armosto1_258076	Auramp1_569875	Copci_AmutBmut1_504757		Mk_01207000	PleosPC15_2_152828	Ptegra1_557925	Schco3_2482735	IPR012923::Chromosome segregation in meiosis protein 3::7	IPR040038::TIPIN/Csm3/Swi3::7									36
Cons_CM-specific	orbh_3535	0	2	4	4	2	1	4	2	4	8	7	0.875	-	Agabi_varbisH97_2_118672	Armosto1_265254	Auramp1_488989	Copci_AmutBmut1_460017		Mk_01433500	PleosPC15_2_1100343	Ptegra1_592470	Schco3_2619041	IPR019038::D polymerase delta subunit 3::8	IPR041913::D polymerase delta subunit 3 superfamily::6									69
Cons_CM-specific	orbh_3595	0	1	4	4	4	2	2	2	2	8	7	0.875	X	Agabi_varbisH97_2_123365	Armosto1_264607	Auramp1_557743	Copci_AmutBmut1_469241		Mk_01029500	PleosPC15_2_1101210	Ptegra1_511183	Schco3_2594205	IPR039057::Sporulation-specific protein 22::8	IPR013940::Meiosis specific protein Spo22/ZIP4/TEX11::7
Cons_CM-specific	orbh_4242	0	2	1	4	4	2	4	1	4	8	6	0.75	-	Agabi_varbisH97_2_196792	Armosto1_269081	Auramp1_486120	Copci_AmutBmut1_357769		Mk_01288900	PleosPC15_2_1102024	Ptegra1_600183	Schco3_2610320	IPR003511::HORMA domain::8	IPR036570::HORMA domain superfamily::8									135	rev7_pombe			D polymerase zeta Rev7 (predicted)
Cons_CM-specific	orbh_4516	1	1	4	4	2	2	4	2	0	8	6	0.857143	-	Agabi_varbisH97_2_223857	Armosto1_252699	Auramp1_401409		Cryne_JEC21_1_3939	Mk_00929300	PleosPC15_2_1036085	Ptegra1_423426	Schco3_2533371	IPR027417::P-loop containing nucleoside triphosphate hydrolase::8	IPR003395::RecF/RecN/SMC; N-termil::7	IPR027132::Structural maintence of chromosomes protein 6::2
Cons_CM-specific	orbh_66140	0	0	4	4	2	4	4	0	0	5	5	1	-		Armosto1_256268	Auramp1_561089			Mk_00596900	PleosPC15_2_1109681		Schco3_2550939	IPR013083::Zinc finger; RING/FYVE/PHD-type::5	IPR001650::Helicase; C-termil::5	IPR000330::SNF2-related; N-termil domain::5	IPR017907::Zinc finger; RING-type; conserved site::5	IPR027417::P-loop containing nucleoside triphosphate hydrolase::5	IPR001841::Zinc finger; RING-type::5	IPR014001::Helicase superfamily 1/2; ATP-binding domain::5	IPR038718::SNF2-like; N-termil domain superfamily::5
Cons_CM-specific	orbh_4316	0	1	4	4	1	4	2	1	4	8	5	0.625	-	Agabi_varbisH97_2_203085	Armosto1_261736	Auramp1_479443	Copci_AmutBmut1_444409		Mk_00082700	PleosPC15_2_1024183	Ptegra1_574577	Schco3_2499337	IPR001357::BRCT domain::8	IPR036420::BRCT domain superfamily::8									97
Cons_CM-specific	orbh_6283	0	1	4	4	4	4	1	0	0	6	4	0.666667	-		Armosto1_257077	Auramp1_484403			Mk_00869600	PleosPC15_2_1084238	Ptegra1_599404	Schco3_2580737	IPR036397::Ribonuclease H superfamily::6	IPR012337::Ribonuclease H-like superfamily::6	IPR002562::3'-5' exonuclease domain::6
Cons_CM-specific	orbh_4322	0	2	4	4	4	4	4	2	4	8	8	1	-	Agabi_varbisH97_2_203343	Armosto1_261749	Auramp1_564558	Copci_AmutBmut1_381324		Mk_00081600	PleosPC15_2_1076083	Ptegra1_569127	Schco3_2666500	IPR000219::Dbl homology (DH) domain::8	IPR035899::Dbl homology (DH) domain superfamily::8	IPR011993::PH-like domain superfamily::6								79
Cons_CM-specific	orbh_4488	0	4	4	4	4	4	4	4	4	8	8	1	-	Agabi_varbisH97_2_221106	Armosto1_250740	Auramp1_473188	Copci_AmutBmut1_529780		Mk_00674800	PleosPC15_2_1093300	Ptegra1_14416	Schco3_1214326	IPR036188::FAD/D(P)-binding domain superfamily::8	IPR006905::Flavin-dependent halogese::8									82
Cons_CM-specific	orbh_4072	0	4	4	4	4	2	4	4	4	8	8	1	-	Agabi_varbisH97_2_192459	Armosto1_250905	Auramp1_473331	Copci_AmutBmut1_471416		Mk_00667900	PleosPC15_2_1064958	Ptegra1_544892	Schco3_2669525	IPR005532::Sulfatase-modifying factor enzyme::8	IPR042095::Sulfatase-modifying factor enzyme superfamily::8	IPR016187::C-type lectin fold::8	IPR024775::DinB-like domain::7	IPR034660::DinB/YfiT-like putative metalloenzymes::2						70
Cons_CM-specific	orbh_4098	0	4	4	4	2	4	4	4	4	8	8	1	-	Agabi_varbisH97_2_192925	Armosto1_256504	Auramp1_492562	Copci_AmutBmut1_511951		Mk_00024300	PleosPC15_2_185948	Ptegra1_578584	Schco3_2643503	IPR029033::Histidine phosphatase superfamily::8										286	AN8063_Aspnid NCU07959_Neucr	Uncharacterized ORF Putative acid phosphatase transcript repressed by light in developmentally competent mycelia
Cons_CM-specific	orbh_4773	0	2	4	4	4	4	4	4	4	8	8	1	-	Agabi_varbisH97_2_65665	Armosto1_257080	Auramp1_118050	Copci_AmutBmut1_476273		Mk_00310400	PleosPC15_2_1106343	Ptegra1_215537	Schco3_2274749	IPR032675::Leucine-rich repeat domain superfamily::8										70
Cons_CM-specific	orbh_3914	0	2	4	4	4	4	4	2	4	8	8	1	-	Agabi_varbisH97_2_188674	Armosto1_262616	Auramp1_564321	Copci_AmutBmut1_24490		Mk_01411500	PleosPC15_2_1064597	Ptegra1_537503	Schco3_2537529	IPR001128::Cytochrome P450::8	IPR036396::Cytochrome P450 superfamily::8	IPR002401::Cytochrome P450; E-class; group I::8								218
Cons_CM-specific	orbh_3653	0	2	4	2	2	4	4	4	4	8	8	1	-	Agabi_varbisH97_2_139599	Armosto1_263650	Auramp1_510837	Copci_AmutBmut1_497690		Mk_00173800	PleosPC15_2_1061762	Ptegra1_577159	Schco3_2607907	IPR000375::Dymin stalk domain::8	IPR003130::Dymin GTPase effector::8	IPR022812::Dymin superfamily::8	IPR027417::P-loop containing nucleoside triphosphate hydrolase::8	IPR001401::Dymin; GTPase domain::8	IPR020850::GTPase effector domain::8	IPR030381::Dymin-type guanine nucleotide-binding (G) domain::7				195	NCU04935_Neucr
Cons_CM-specific	orbh_3997	0	2	4	4	4	4	2	2	4	8	8	1	-	Agabi_varbisH97_2_190790	Armosto1_250595	Auramp1_510149	Copci_AmutBmut1_412782		Mk_00427500	PleosPC15_2_1111045	Ptegra1_590409	Schco3_2639849	IPR029045::ClpP/crotose-like domain superfamily::8	IPR005151::Tail specific protease::5									76
Cons_CM-specific	orbh_4633	0	2	4	2	4	4	2	4	4	8	8	1	-	Agabi_varbisH97_2_70376	Armosto1_251123	Auramp1_473216	Copci_AmutBmut1_119838		Mk_01453200	PleosPC15_2_1041750	Ptegra1_527223	Schco3_2508441	IPR015422::Pyridoxal phosphate-dependent transferase domain 1::8	IPR015424::Pyridoxal phosphate-dependent transferase::8	IPR015421::Pyridoxal phosphate-dependent transferase; major domain::8	IPR000192::Aminotransferase class V domain::8							326	NCU07805_Neucr AN5314_Aspnid	Uncharacterized ORF Has domains with predicted catalytic activity; pyridoxal phosphate binding activity and role in metabolic process
Cons_CM-specific	orbh_3731	0	2	4	4	2	4	2	2	4	8	8	1	-	Agabi_varbisH97_2_178164	Armosto1_250202	Auramp1_625261	Copci_AmutBmut1_389532		Mk_00481400	PleosPC15_2_1093236	Ptegra1_547070	Schco3_2583540	IPR029063::S-adenosyl-L-methionine-dependent methyltransferase::8										197	NCU10144_Neucr
Cons_CM-specific	orbh_3530	0	2	4	2	2	4	2	4	2	8	8	1	-	Agabi_varbisH97_2_117833	Armosto1_255633	Auramp1_406026	Copci_AmutBmut1_387352		Mk_00714500	PleosPC15_2_1060766	Ptegra1_498052	Schco3_1084057	IPR027815::10TM putative phosphate transporter; cytosolic domain::8	IPR003864::Calcium-dependent channel; 7TM region; putative phosphate::8	IPR032880::Calcium permeable stress-gated cation channel 1; N-termil transmembrane domain::8	IPR022257::10TM putative phosphate transporter; extracellular tail::5							117	SPAC24H6.13_pombe YMR266W_RSN1_Sacce1			calcium permeable stress-gated cation channel (predicted). Acts as an osmosensitive calcium-permeable cation channel.	Membrane protein of unknown function; overexpression suppresses Cl sensitivity of sro7 mutant cells by restoring sodium pump (E1p) localization to the plasma membrane
Cons_CM-specific	orbh_4143	0	1	4	2	4	2	4	2	4	8	7	0.875	-	Agabi_varbisH97_2_194179	Armosto1_251537	Auramp1_402057	Copci_AmutBmut1_252133		Mk_01224300	PleosPC15_2_1053206	Ptegra1_564876	Schco3_2088105	IPR001382::Glycoside hydrolase family 47::8	IPR036026::Seven-hairpin glycosidases::8	IPR012341::Six-hairpin glycosidase-like superfamily::8								243	AN0787_mns1B_Aspnid mns1B_Aspnid mns1B_Aspnig	Uncharacterized ORF Putative mannosyl-oligosaccharide 1;2-alpha-mannosidase with a predicted role in mannose polymer metabolism
Cons_CM-specific	orbh_4805	0	2	4	1	4	4	4	2	4	8	7	0.875	-	Agabi_varbisH97_2_196562	Armosto1_258702	Auramp1_535549	Copci_AmutBmut1_105035		Mk_00663400	PleosPC15_2_1063328	Ptegra1_540447	Schco3_1143627	IPR000269::Copper amine oxidase::8	IPR015802::Copper amine oxidase; N3-termil::8	IPR016182::Copper amine oxidase; N-termil::8	IPR015798::Copper amine oxidase; catalytic domain::8	IPR036460::Copper amine oxidase; catalytic domain superfamily::8	IPR015800::Copper amine oxidase; N2-termil::5	IPR019191::Essential protein Yae1; N-termil::2				389	cao1_pombe NCU05518_Neucr			Copper amine oxidase involved in the metabolism of xenobiotic and biogenic amines. Capable of catalyzing the oxidative deamition of primary amines such as ethylamine as alterte sources of nitrogen to support growth
Cons_CM-specific	orbh_5194	0	0	4	4	4	4	4	4	4	7	7	1	-	Agabi_varbisH97_2_114425	Armosto1_268363	Auramp1_572010	Copci_AmutBmut1_438394		Mk_00794900	PleosPC15_2_1101852		Schco3_2530244	IPR012337::Ribonuclease H-like superfamily::7	IPR036397::Ribonuclease H superfamily::7	IPR013520::Exonuclease; Rse T/D polymerase III::7	IPR037431::R exonuclease 4; DEDDh 3'-5' exonuclease domain::3							88
Cons_CM-specific	orbh_5486	0	4	4	4	4	4	0	4	4	7	7	1	-	Agabi_varbisH97_2_203063		Auramp1_480382	Copci_AmutBmut1_496853		Mk_00934500	PleosPC15_2_1112157	Ptegra1_182186	Schco3_2687800	IPR027417::P-loop containing nucleoside triphosphate hydrolase::7	IPR008900::Zo occludens toxin; N-termil::4									257	AN10650_Aspnid	Uncharacterized ORF
Cons_CM-specific	orbh_103	1	2	4	4	4	4	4	1	4	9	7	0.875	-	Agabi_varbisH97_2_117681	Armosto1_250458	Auramp1_13674	Copci_AmutBmut1_412629	Cryne_JEC21_1_5281	Mk_00646700	PleosPC15_2_1096927	Ptegra1_565465	Schco3_1129253	IPR001849::Pleckstrin homology domain::1										5
Cons_CM-specific	orbh_3465	1	2	4	4	4	4	4	1	4	9	7	0.875	-	Agabi_varbisH97_2_198869	Armosto1_258305	Auramp1_497757	Copci_AmutBmut1_440836	Cryne_JEC21_1_4957	Mk_01050600	PleosPC15_2_152955	Ptegra1_408416	Schco3_2742625	IPR009880::Glyoxal oxidase; N-termil::9	IPR011043::Galactose oxidase/kelch; beta-propeller::9	IPR037293::Galactose oxidase; central domain superfamily::9	IPR015202::Galactose oxidase-like; Early set domain::9	IPR014756::Immunoglobulin E-set::9	IPR013783::Immunoglobulin-like fold::8	IPR008979::Galactose-binding-like domain superfamily::7				164
Cons_CM-specific	orbh_4650	0	1	4	4	4	4	4	2	4	8	7	0.875	-	Agabi_varbisH97_2_72787	Armosto1_271149	Auramp1_401416	Copci_AmutBmut1_431646		Mk_00901100	PleosPC15_2_1057999	Ptegra1_505748	Schco3_2490971	IPR002922::Thiazole biosynthetic enzyme Thi4 family::8	IPR036188::FAD/D(P)-binding domain superfamily::8	IPR027495::Thiamine thiazole synthase::8								346	thiA_Aspnid AN3928_thiF_Aspnid YGR144W_THI4_Sacce1 thi2_pombe THI4_candida UMAG_11400_ustilago	Uncharacterized ORF Putative thiazole synthase; enzyme of the thiamine biosynthesis pathway		thiazole biosynthetic enzyme	Thiazole synthase; abundant protein involved in the formation of the thiazole moiety of thiamine during thiamine biosynthesis; acts more as a co-substrate rather than an enzyme by providing the sulphur source for thiazole formation; undergoes a single turnover only; required for mitochondrial genome stability in response to D damaging agents
Cons_CM-specific	orbh_4672	0	1	4	4	2	4	4	4	4	8	7	0.875	-	Agabi_varbisH97_2_76731	Armosto1_271874	Auramp1_408099	Copci_AmutBmut1_114016		Mk_00266300	PleosPC15_2_1021615	Ptegra1_509526	Schco3_2515662	IPR040684::Alpha-glutamyl/putrescinyl thymine pyrophosphorylase clade 1::8	IPR000953::Chromo/chromo shadow domain::7	IPR016197::Chromo-like domain superfamily::7	IPR023780::Chromo domain::6							93
Cons_CM-specific	orbh_5267	0	0	4	4	4	4	4	2	4	7	7	1	-	Agabi_varbisH97_2_144580	Armosto1_251503	Auramp1_498594	Copci_AmutBmut1_424800		Mk_00455400	PleosPC15_2_154277		Schco3_2052729	IPR000504::R recognition motif domain::7	IPR035979::R-binding domain superfamily::7	IPR012677::Nucleotide-binding alpha-beta plait domain superfamily::7								84
Cons_CM-specific	orbh_5440	0	0	4	4	2	4	4	4	4	7	7	1	-	Agabi_varbisH97_2_194995	Armosto1_253427	Auramp1_562978	Copci_AmutBmut1_500758		Mk_00608300	PleosPC15_2_1060426		Schco3_2508228	IPR006683::Thioesterase domain::7	IPR029069::HotDog domain superfamily::7	IPR039298::Acyl-coenzyme A thioesterase 13::5	IPR003736::Phenylacetic acid degradation-related domain::3							64
Cons_CM-specific	orbh_3769	0	2	4	4	1	2	4	4	4	8	7	0.875	-	Agabi_varbisH97_2_180378	Armosto1_266926	Auramp1_533595	Copci_AmutBmut1_354852		Mk_00237600	PleosPC15_2_3618	Ptegra1_581117	Schco3_2359934	IPR027417::P-loop containing nucleoside triphosphate hydrolase::8	IPR011579::ATPase domain::4	IPR003593::AAA+ ATPase domain::2								119
Cons_CM-specific	orbh_3822	0	2	4	4	4	1	4	2	4	8	7	0.875	-	Agabi_varbisH97_2_183773	Armosto1_272259	Auramp1_400067	Copci_AmutBmut1_488324		Mk_00634400	PleosPC15_2_1106245	Ptegra1_558593	Schco3_2541321	IPR036291::D(P)-binding domain superfamily::8	IPR011032::GroES-like superfamily::8	IPR013149::Alcohol dehydrogese; C-termil::8	IPR020843::Polyketide synthase; enoylreductase domain::8	IPR041694::Oxidoreductase; N-termil domain::7						331	mig-4_Neucr SPAPB24D3.08c_pombe AN0895_Aspnid	Verified ORF Predicted D-dependent oxidoreductase intracellular expression upregulated after exposure to farnesol		DP-dependent oxidoreductase; implicated in cellular detoxification (predicted)
Cons_CM-specific	orbh_4073	0	2	4	4	4	1	2	4	4	8	7	0.875	-	Agabi_varbisH97_2_192474	Armosto1_264532	Auramp1_549070	Copci_AmutBmut1_448649		Mk_00663300	PleosPC15_2_1065319	Ptegra1_529459	Schco3_2567361	IPR005835::Nucleotidyl transferase domain::8	IPR029044::Nucleotide-diphospho-sugar transferases::8									129
Cons_CM-specific	orbh_4093	0	2	4	4	1	2	4	4	4	8	7	0.875	-	Agabi_varbisH97_2_192776	Armosto1_250858	Auramp1_475815	Copci_AmutBmut1_386671		Mk_00679500	PleosPC15_2_1112899	Ptegra1_498042	Schco3_2368049	IPR001106::Aromatic amino acid lyase::8	IPR024083::Fumarase/histidase; N-termil::8	IPR005922::Phenylalanine ammonia-lyase::8	IPR022313::Phenylalanine/histidine ammonia-lyases; active site::8	IPR008948::L-Aspartase-like::8	IPR023144::Phenylalanine ammonia-lyase; shielding domain superfamily::8					120
Cons_CM-specific	orbh_4144	0	2	4	4	1	4	4	2	4	8	7	0.875	-	Agabi_varbisH97_2_194181	Armosto1_251638	Auramp1_273028	Copci_AmutBmut1_361801		Mk_00421000	PleosPC15_2_175456	Ptegra1_524591	Schco3_2640550	IPR036396::Cytochrome P450 superfamily::8	IPR001128::Cytochrome P450::8	IPR002401::Cytochrome P450; E-class; group I::8	IPR017972::Cytochrome P450; conserved site::8							332	NCU01086_Neucr AN10950_bzuA_Aspnid bphA_Aspnig	Verified ORF Cytochrome P450; member of CYP53A3 family
Cons_CM-specific	orbh_4413	0	1	4	4	2	2	4	4	4	8	7	0.875	-	Agabi_varbisH97_2_211510	Armosto1_269777	Auramp1_163369	Copci_AmutBmut1_363228		Mk_00228200	PleosPC15_2_1058708	Ptegra1_526500	Schco3_1097210	IPR029058::Alpha/Beta hydrolase fold::8	IPR013094::Alpha/beta hydrolase fold-3::8									154
Cons_CM-specific	orbh_4860	0	4	4	4	1	2	4	2	4	8	7	0.875	-	Agabi_varbisH97_2_118862	Armosto1_264966	Auramp1_571441	Copci_AmutBmut1_435032		Mk_01439000	PleosPC15_2_1089940	Ptegra1_528740	Schco3_2497333	IPR029044::Nucleotide-diphospho-sugar transferases::4										110
Cons_CM-specific	orbh_4924	0	1	2	4	4	4	4	4	2	8	7	0.875	-	Agabi_varbisH97_2_196994	Armosto1_269009	Auramp1_196123	Copci_AmutBmut1_493933		Mk_01282700	PleosPC15_2_1092456	Ptegra1_564618	Schco3_1083109	IPR036400::Cytochrome b5-like heme/steroid binding domain superfamily::8	IPR001199::Cytochrome b5-like heme/steroid binding domain::8	IPR015876::Acyl-CoA desaturase::8	IPR018506::Cytochrome b5; heme-binding site::8	IPR009160::Acyl-CoA desaturase; haem/steroid binding domain-containing::4	IPR005804::Fatty acid desaturase domain::4					70
Cons_CM-specific	orbh_3982	0	1	4	2	2	2	4	4	4	8	7	0.875	-	Agabi_varbisH97_2_190396	Armosto1_255583	Auramp1_157841	Copci_AmutBmut1_358138		Mk_01036200	PleosPC15_2_1052218	Ptegra1_519979	Schco3_2608149	IPR004839::Aminotransferase; class I/classII::8	IPR015421::Pyridoxal phosphate-dependent transferase; major domain::8	IPR015424::Pyridoxal phosphate-dependent transferase::8								343	AN5591_Aspnid NCU03500_Neucr	Uncharacterized ORF Putative aminotransferase protein expressed at decreased levels in a hapX mutant versus wild-type
Cons_CM-specific	orbh_4687	0	2	4	2	1	2	4	4	4	8	7	0.875	-	Agabi_varbisH97_2_80093	Armosto1_257987	Auramp1_499518	Copci_AmutBmut1_443918		Mk_00549900	PleosPC15_2_1090244	Ptegra1_507570	Schco3_2613857	IPR020422::Dual specificity protein phosphatase domain::8	IPR000387::Tyrosine specific protein phosphatases domain::8	IPR029021::Protein-tyrosine phosphatase-like::8	IPR016130::Protein-tyrosine phosphatase; active site::8	IPR000340::Dual specificity phosphatase; catalytic domain::8						168
Cons_CM-specific	orbh_5316	0	0	4	2	2	4	4	2	4	7	7	1	-	Agabi_varbisH97_2_182469	Armosto1_265792	Auramp1_185464	Copci_AmutBmut1_374191		Mk_00774200	PleosPC15_2_172208		Schco3_2706144	IPR002347::Short-chain dehydrogese/reductase SDR::7	IPR036291::D(P)-binding domain superfamily::7	IPR020904::Short-chain dehydrogese/reductase; conserved site::6								85
Cons_CM-specific	orbh_5634	0	2	2	0	4	4	2	4	4	7	7	1	-	Agabi_varbisH97_2_183863	Armosto1_253031	Auramp1_250754	Copci_AmutBmut1_497637			PleosPC15_2_1046712	Ptegra1_346981	Schco3_2701751	IPR002939::Chaperone DJ; C-termil::7	IPR036869::Chaperone J-domain superfamily::6	IPR001623::DJ domain::6	IPR008971::HSP40/DJ peptide-binding::6							7
Cons_CM-specific	orbh_781	1	2	4	1	2	2	4	2	4	9	7	0.875	-	Agabi_varbisH97_2_184539	Armosto1_261837	Auramp1_491534	Copci_AmutBmut1_493114	Cryne_JEC21_1_6341	Mk_00098900	PleosPC15_2_1076047	Ptegra1_560436	Schco3_1093854	IPR037143::4'-phosphopantetheinyl transferase domain superfamily::9	IPR008278::4'-phosphopantetheinyl transferase domain::9	IPR004568::Phosphopantetheine-protein transferase domain::9	IPR002582::Holo-[acyl carrier protein] synthase::7							145	new8_pombe			holo-[acyl-carrier-protein] synthase (predicted). Transfers the 4'-phosphopantetheine moiety from coenzyme A to a Ser of acyl-carrier-protein.
Cons_CM-specific	orbh_3752	0	1	4	4	4	4	4	4	4	8	7	0.875	-	Agabi_varbisH97_2_179146	Armosto1_270886	Auramp1_456663	Copci_AmutBmut1_541323		Mk_00918900	PleosPC15_2_1097497	Ptegra1_604426	Schco3_2533489	IPR016024::Armadillo-type fold::8										94
Cons_CM-specific	orbh_3825	0	1	2	2	4	2	4	4	4	8	7	0.875	-	Agabi_varbisH97_2_183868	Armosto1_253913	Auramp1_252195	Copci_AmutBmut1_459913		Mk_00600000	PleosPC15_2_1047763	Ptegra1_571092	Schco3_2643012	IPR000172::Glucose-methanol-choline oxidoreductase; N-termil::8	IPR012132::Glucose-methanol-choline oxidoreductase::8	IPR036188::FAD/D(P)-binding domain superfamily::8	IPR007867::Glucose-methanol-choline oxidoreductase; C-termil::8							55	AN8547_gmcA_Aspnid	Verified ORF Putative glucose-methanol-choline (GMC) oxidoreductase required for early stages of conidiophore development intracellular protein abundance decreased by medione stress
Cons_CM-specific	orbh_5346	0	2	4	4	4	2	4	4	0	7	7	1	-	Agabi_varbisH97_2_189342	Armosto1_253782	Auramp1_549506			Mk_00285800	PleosPC15_2_1088612	Ptegra1_66548	Schco3_2617482	IPR016191::Ribonuclease/ribotoxin::7	IPR000026::Guanine-specific ribonuclease N1/T1/U2::7
Cons_CM-specific	orbh_5099	0	2	4	4	4	4	4	4	1	8	7	0.875	-	Agabi_varbisH97_2_209502	Armosto1_261537	Auramp1_565305	Copci_AmutBmut1_438884		Mk_00057500	PleosPC15_2_1064370	Ptegra1_605888	Schco3_2501258	IPR036396::Cytochrome P450 superfamily::8	IPR002401::Cytochrome P450; E-class; group I::8	IPR001128::Cytochrome P450::8	IPR017972::Cytochrome P450; conserved site::7							92
Cons_CM-specific	orbh_3621	0	4	2	4	2	2	4	4	1	8	7	0.875	-	Agabi_varbisH97_2_134948	Armosto1_271073	Auramp1_565247	Copci_AmutBmut1_279218		Mk_00438300	PleosPC15_2_1073880	Ptegra1_601004	Schco3_2624086	IPR008754::Peptidase M43; pregncy-associated plasma-A::8	IPR024079::Metallopeptidase; catalytic domain superfamily::8									122	AN6426_Aspnid	Uncharacterized ORF Has domains with predicted metallopeptidase activity
Cons_CM-specific	orbh_5184	0	1	2	4	2	2	4	4	4	8	7	0.875	-	Agabi_varbisH97_2_210521	Armosto1_272060	Auramp1_402828	Copci_AmutBmut1_462868		Mk_00538800	PleosPC15_2_34675	Ptegra1_354182	Schco3_2705258	IPR036396::Cytochrome P450 superfamily::8	IPR002401::Cytochrome P450; E-class; group I::8	IPR001128::Cytochrome P450::8	IPR017972::Cytochrome P450; conserved site::7							115
Cons_CM-specific	orbh_5880	0	2	4	4	0	4	4	2	2	7	7	1	-	Agabi_varbisH97_2_190121	Armosto1_255124		Copci_AmutBmut1_104956		Mk_00193200	PleosPC15_2_1111193	Ptegra1_575833	Schco3_2641563	IPR002347::Short-chain dehydrogese/reductase SDR::7	IPR036291::D(P)-binding domain superfamily::7	IPR020904::Short-chain dehydrogese/reductase; conserved site::7								305	NCU07964_Neucr
Cons_CM-specific	orbh_3865	0	4	4	1	4	1	4	4	4	8	6	0.75	-	Agabi_varbisH97_2_185678	Armosto1_256607	Auramp1_568270	Copci_AmutBmut1_464469		Mk_01167300	PleosPC15_2_1112991	Ptegra1_519548	Schco3_2608248	IPR022812::Dymin superfamily::8	IPR001401::Dymin; GTPase domain::8	IPR003130::Dymin GTPase effector::8	IPR027417::P-loop containing nucleoside triphosphate hydrolase::8	IPR020850::GTPase effector domain::8	IPR030381::Dymin-type guanine nucleotide-binding (G) domain::8	IPR000375::Dymin stalk domain::8				190	NCU05936_Neucr
Cons_CM-specific	orbh_4205	0	1	4	4	4	1	4	4	4	8	6	0.75	-	Agabi_varbisH97_2_195553	Armosto1_261416	Auramp1_481371	Copci_AmutBmut1_492531		Mk_00183500	PleosPC15_2_1110004	Ptegra1_607143	Schco3_2607677	IPR000172::Glucose-methanol-choline oxidoreductase; N-termil::8	IPR036188::FAD/D(P)-binding domain superfamily::8	IPR007867::Glucose-methanol-choline oxidoreductase; C-termil::8	IPR012132::Glucose-methanol-choline oxidoreductase::8							263	NCU01853_Neucr AN0567_Aspnid	Verified ORF Putative alcohol oxidase with a predicted role in glycerol metabolism
Cons_CM-specific	orbh_5216	0	0	1	4	4	4	4	4	4	7	6	0.857143	-	Agabi_varbisH97_2_117625	Armosto1_250396	Auramp1_15019	Copci_AmutBmut1_39881		Mk_00648400	PleosPC15_2_1040633		Schco3_2632855	IPR007269::Isoprenylcysteine carboxyl methyltransferase::6										66
Cons_CM-specific	orbh_5507	0	1	4	4	4	0	4	4	4	7	6	0.857143	-	Agabi_varbisH97_2_206800	Armosto1_270593	Auramp1_412771	Copci_AmutBmut1_526654		Mk_01462300	PleosPC15_2_1097486	Ptegra1_433623		IPR002347::Short-chain dehydrogese/reductase SDR::7	IPR036291::D(P)-binding domain superfamily::7									90
Cons_CM-specific	orbh_5537	0	0	4	4	1	4	4	4	4	7	6	0.857143	-	Agabi_varbisH97_2_213163	Armosto1_255556	Auramp1_537793	Copci_AmutBmut1_377898		Mk_00930200	PleosPC15_2_1067048		Schco3_2614092	IPR036188::FAD/D(P)-binding domain superfamily::7	IPR025700::L-lysine 6-monooxygese/L-ornithine 5-monooxygese::3	IPR023753::FAD/D(P)-binding domain::2	IPR020946::Flavin monooxygese-like::2							228	AN8660_Aspnid NCU06296_Neucr	Uncharacterized ORF
Cons_CM-specific	orbh_5068	0	1	2	4	4	1	4	4	4	8	6	0.75	-	Agabi_varbisH97_2_194160	Armosto1_265666	Auramp1_571826	Copci_AmutBmut1_463032		Mk_00010900	PleosPC15_2_1047743	Ptegra1_577310	Schco3_2522774	IPR029058::Alpha/Beta hydrolase fold::8	IPR000073::Alpha/beta hydrolase fold-1::6									89
Cons_CM-specific	orbh_5533	0	0	1	4	4	2	4	4	4	7	6	0.857143	-	Agabi_varbisH97_2_212153	Armosto1_262542	Auramp1_140402	Copci_AmutBmut1_420787		Mk_00950800	PleosPC15_2_1038800		Schco3_2680754	IPR029069::HotDog domain superfamily::7	IPR006683::Thioesterase domain::2									56
Cons_CM-specific	orbh_3696	0	1	4	1	4	2	4	4	4	8	6	0.75	-	Agabi_varbisH97_2_154300	Armosto1_262221	Auramp1_555052	Copci_AmutBmut1_470378		Mk_00111100	PleosPC15_2_1076243	Ptegra1_571881	Schco3_1177712	IPR027795::CASTOR; ACT domain::6										90
Cons_CM-specific	orbh_5405	0	2	4	0	4	4	1	4	4	7	6	0.857143	-	Agabi_varbisH97_2_192664	Armosto1_250721	Auramp1_515635	Copci_AmutBmut1_495373			PleosPC15_2_1083983	Ptegra1_524463	Schco3_2701028	IPR023214::HAD superfamily::7	IPR006439::HAD hydrolase; subfamily IA::7	IPR041492::Haloacid dehalogese-like hydrolase::7	IPR036412::HAD-like superfamily::7	IPR023198::Phosphoglycolate phosphatase-like; domain 2::4						136	AN5173_Aspnid NCU17138_Neucr	Uncharacterized ORF Has domains with predicted hydrolase activity
Cons_CM-specific	orbh_6018	0	0	4	0	4	2	4	4	4	6	6	1	-	Agabi_varbisH97_2_113942	Armosto1_268985	Auramp1_570720	Copci_AmutBmut1_493748			PleosPC15_2_166490		Schco3_2172963	IPR010730::Heterokaryon incompatibility::1										2
Cons_CM-specific	orbh_3936	0	1	4	2	2	1	4	4	4	8	6	0.75	-	Agabi_varbisH97_2_189416	Armosto1_269024	Auramp1_486616	Copci_AmutBmut1_450674		Mk_01293500	PleosPC15_2_49660	Ptegra1_613288	Schco3_2610850	IPR029666::GDP-fucose transporter::8	IPR004853::Sugar phosphate transporter domain::7									113
Cons_CM-specific	orbh_4352	0	2	4	1	1	4	4	2	4	8	6	0.75	-	Agabi_varbisH97_2_206289	Armosto1_251571	Auramp1_488055	Copci_AmutBmut1_152439		Mk_00883600	PleosPC15_2_1105878	Ptegra1_646822	Schco3_2618122	IPR010721::Protein of unknown function DUF1295::8	IPR001104::3-oxo-5-alpha-steroid 4-dehydrogese; C-termil::8									210
Cons_CM-specific	orbh_4425	0	2	4	2	1	1	4	4	4	8	6	0.75	-	Agabi_varbisH97_2_212117	Armosto1_262550	Auramp1_101178	Copci_AmutBmut1_198594		Mk_01130000	PleosPC15_2_1039000	Ptegra1_517091	Schco3_2621034	IPR006683::Thioesterase domain::8	IPR039298::Acyl-coenzyme A thioesterase 13::8	IPR029069::HotDog domain superfamily::8	IPR003736::Phenylacetic acid degradation-related domain::7							100
Cons_CM-specific	orbh_4573	0	1	2	2	1	4	4	4	4	8	6	0.75	-	Agabi_varbisH97_2_61337	Armosto1_268878	Auramp1_485748	Copci_AmutBmut1_498683		Mk_00810400	PleosPC15_2_1092227	Ptegra1_545192	Schco3_2609923	IPR042099::AMP-dependent synthetase-like superfamily::8	IPR000873::AMP-dependent synthetase/ligase::8	IPR025110::AMP-binding enzyme; C-termil domain::7	IPR020845::AMP-binding; conserved site::6							337	NCU00129_Neucr
Cons_CM-specific	orbh_4656	0	1	4	2	1	2	4	4	4	8	6	0.75	-	Agabi_varbisH97_2_73753	Armosto1_251623	Auramp1_402504	Copci_AmutBmut1_361786		Mk_00436300	PleosPC15_2_1061968	Ptegra1_328502	Schco3_2517064	IPR036396::Cytochrome P450 superfamily::8	IPR001128::Cytochrome P450::8	IPR002401::Cytochrome P450; E-class; group I::7	IPR017972::Cytochrome P450; conserved site::7							194
Cons_CM-specific	orbh_4762	0	1	4	2	2	1	4	4	4	8	6	0.75	-	Agabi_varbisH97_2_77755	Armosto1_255310	Auramp1_503406	Copci_AmutBmut1_424891		Mk_00336000	PleosPC15_2_1113674	Ptegra1_634486	Schco3_2748664	IPR001128::Cytochrome P450::8	IPR036396::Cytochrome P450 superfamily::8	IPR002401::Cytochrome P450; E-class; group I::4	IPR002403::Cytochrome P450; E-class; group IV::4							38
Cons_CM-specific	orbh_5016	0	2	4	0	1	2	4	4	4	7	6	0.857143	-	Agabi_varbisH97_2_213044	Armosto1_261043	Auramp1_521043	Copci_AmutBmut1_374255			PleosPC15_2_1021683	Ptegra1_576283	Schco3_2645588	IPR003607::HD/PDEase domain::5	IPR006674::HD domain::5									112
Cons_CM-specific	orbh_5714	0	2	4	2	4	1	4	0	4	7	6	0.857143	-		Armosto1_261816	Auramp1_546260	Copci_AmutBmut1_154712		Mk_00087900	PleosPC15_2_1103409	Ptegra1_630494	Schco3_2696381	IPR032466::Metal-dependent hydrolase::7	IPR006680::Amidohydrolase-related::7	IPR032465::2-amino-3-carboxymucote-6-semialdehyde decarboxylase::6								243	yanB_Aspnig NCU09844_Neucr AN3601_Aspnid	Uncharacterized ORF Has domains with predicted catalytic activity and role in metabolic process
Cons_CM-specific	orbh_6006	0	0	2	2	4	1	4	4	4	7	6	0.857143	-	Agabi_varbisH97_2_195996	Armosto1_268525	Auramp1_487002	Copci_AmutBmut1_359808		Mk_00825000	PleosPC15_2_155371		Schco3_2611234	IPR001128::Cytochrome P450::7	IPR036396::Cytochrome P450 superfamily::7	IPR017972::Cytochrome P450; conserved site::7	IPR002401::Cytochrome P450; E-class; group I::7							46
Cons_CM-specific	orbh_6033	0	2	4	0	4	4	0	4	2	6	6	1	-	Agabi_varbisH97_2_118559		Auramp1_493298	Copci_AmutBmut1_240258			PleosPC15_2_1035376	Ptegra1_183993	Schco3_2615375	IPR029062::Class I glutamine amidotransferase-like::6	IPR002818::DJ-1/PfpI::5									233	AN8527_Aspnid NCU01521_Neucr	Uncharacterized ORF
Cons_CM-specific	orbh_6213	0	0	2	2	0	4	4	4	4	6	6	1	-	Agabi_varbisH97_2_63838	Armosto1_266800		Copci_AmutBmut1_361131		Mk_01064000	PleosPC15_2_1091641		Schco3_2607222	IPR021848::Protein of unknown function DUF3445::6										301	NCU09173_Neucr AN4673_Aspnid	Uncharacterized ORF
Cons_CM-specific	orbh_6142	0	0	4	4	2	4	4	4	0	6	6	1	-	Agabi_varbisH97_2_195441	Armosto1_263442	Auramp1_503340			Mk_00497100	PleosPC15_2_162491		Schco3_2643671	IPR002893::Zinc finger; MYND-type::1
Cons_CM-specific	orbh_6307	0	2	4	4	4	4	4	0	0	6	6	1	-		Armosto1_261734	Auramp1_394391			Mk_00083300	PleosPC15_2_1039480	Ptegra1_499548	Schco3_2498828	IPR010619::Putative threonine/serine exporter::6	IPR024528::Threonine/Serine exporter; ThrE::2
Cons_CM-specific	orbh_6349	0	2	4	4	4	4	4	0	0	6	6	1	-		Armosto1_266934	Auramp1_508232			Mk_01060200	PleosPC15_2_1031438	Ptegra1_652595	Schco3_2525660	IPR001969::Aspartic peptidase; active site::6	IPR021109::Aspartic peptidase domain superfamily::6	IPR001461::Aspartic peptidase A1 family::6	IPR033121::Peptidase family A1 domain::6	IPR034164::Pepsin-like domain::6
Cons_CM-specific	orbh_6414	0	2	4	4	4	4	4	0	0	6	6	1	-		Armosto1_258942	Auramp1_437776			Mk_00302800	PleosPC15_2_1089765	Ptegra1_577701	Schco3_2699522	IPR002395::HMW kininogen::1
Cons_CM-specific	orbh_5663	0	2	4	2	4	1	4	4	0	7	6	0.857143	-	Agabi_varbisH97_2_181658	Armosto1_256009	Auramp1_125341			Mk_00567900	PleosPC15_2_162808	Ptegra1_536521	Schco3_2616264	IPR023198::Phosphoglycolate phosphatase-like; domain 2::7	IPR006439::HAD hydrolase; subfamily IA::7	IPR006328::L-2-Haloacid dehalogese::7	IPR036412::HAD-like superfamily::7	IPR023214::HAD superfamily::7	IPR041492::Haloacid dehalogese-like hydrolase::4
Cons_CM-specific	orbh_5077	0	1	4	4	4	1	4	4	2	8	6	0.75	-	Agabi_varbisH97_2_117546	Armosto1_263563	Auramp1_406228	Copci_AmutBmut1_501966		Mk_00615200	PleosPC15_2_1098419	Ptegra1_353416	Schco3_2492988	IPR029063::S-adenosyl-L-methionine-dependent methyltransferase::8	IPR016461::O-methyltransferase COMT-type::8	IPR036390::Winged helix D-binding domain superfamily::8	IPR036388::Winged helix-like D-binding domain superfamily::8	IPR001077::O-methyltransferase domain::8						289	AN6447_cicE_Aspnid NCU07818_Neucr	Verified ORF Predicted O-methyltransferase coregulated with the PKS pkbA/AN6448 encoded within the cichorine gene cluster
Cons_CM-specific	orbh_3705	0	1	4	4	1	2	4	2	4	8	6	0.75	-	Agabi_varbisH97_2_175803	Armosto1_269025	Auramp1_486622	Copci_AmutBmut1_461236		Mk_01293600	PleosPC15_2_1111661	Ptegra1_570723	Schco3_2610836	IPR023213::Chloramphenicol acetyltransferase-like domain superfamily::6										106
Cons_CM-specific	orbh_4266	0	1	4	4	1	2	4	2	4	8	6	0.75	-	Agabi_varbisH97_2_199013	Armosto1_258273	Auramp1_50380	Copci_AmutBmut1_82352		Mk_01052000	PleosPC15_2_1091469	Ptegra1_565108	Schco3_2485777	IPR006634::TRAM/LAG1/CLN8 homology domain::8										389	NCU02977_Neucr SPAC17A2.02c_pombe YPR114W_YPR114W_Sacce1 AN4224_Aspnid	Uncharacterized ORF Has domains with predicted integral component of membrane localization		ER protein; DUF887 family protein; implicated in lipid metabolism	Putative protein of unknown function
Cons_CM-specific	orbh_4356	0	1	4	4	1	2	4	4	2	8	6	0.75	-	Agabi_varbisH97_2_206884	Armosto1_271189	Auramp1_401421	Copci_AmutBmut1_468131		Mk_00109500	PleosPC15_2_1106385	Ptegra1_548333	Schco3_2616750	IPR019438::Queuosine salvage protein family::8										329	AN2451_Aspnid NCU03527_Neucr SPAC589.05c_pombe	Uncharacterized ORF Orthologs have role in tR-guanine transglycosylation		tR queuosine modification protein Qtr3
Cons_CM-specific	orbh_4377	0	2	4	4	1	1	2	4	4	8	6	0.75	-	Agabi_varbisH97_2_208808	Armosto1_256354	Auramp1_461305	Copci_AmutBmut1_435709		Mk_00620300	PleosPC15_2_1115	Ptegra1_570554	Schco3_2512014	IPR036291::D(P)-binding domain superfamily::8	IPR002225::3-beta hydroxysteroid dehydrogese/isomerase::8									92
Cons_CM-specific	orbh_4466	0	2	4	4	1	2	4	1	4	8	6	0.75	-	Agabi_varbisH97_2_217233	Armosto1_267021	Auramp1_506753	Copci_AmutBmut1_373210		Mk_01232700	PleosPC15_2_21661	Ptegra1_575386	Schco3_2604605	IPR014347::Tautomerase/MIF superfamily::8	IPR001398::Macrophage migration inhibitory factor::8									109
Cons_CM-specific	orbh_5700	0	4	2	4	1	4	2	0	4	7	6	0.857143	-		Armosto1_261396	Auramp1_118291	Copci_AmutBmut1_462849		Mk_00052300	PleosPC15_2_1088921	Ptegra1_576300	Schco3_2624579	IPR008253::Marvel domain::2										89
Cons_CM-specific	orbh_5794	0	2	4	4	1	2	4	0	4	7	6	0.857143	-		Armosto1_269501	Auramp1_535368	Copci_AmutBmut1_283917		Mk_01290400	PleosPC15_2_1101993	Ptegra1_583999	Schco3_2565190	IPR002195::Dihydroorotase; conserved site::1										52
Cons_CM-specific	orbh_4653	0	1	2	1	2	4	2	2	4	8	6	0.75	-	Agabi_varbisH97_2_73127	Armosto1_271009	Auramp1_549534	Copci_AmutBmut1_209946		Mk_00919900	PleosPC15_2_1078053	Ptegra1_656002	Schco3_2491675	IPR027267::AH/BAR domain superfamily::8	IPR001060::FCH domain::7	IPR001452::SH3 domain::6	IPR036028::SH3-like domain superfamily::6	IPR035459::Bzz1; SH3 domain 1::6	IPR002219::Protein kise C-like; phorbol ester/diacylglycerol-binding domain::5	IPR020454::Diacylglycerol/phorbol-ester binding::5	IPR031160::F-BAR domain::4	IPR000210::BTB/POZ domain::2	IPR011333::SKP1/BTB/POZ domain superfamily::2	339	bzz1_pombe AN10999_Aspnid NCU01161_Neucr	Uncharacterized ORF Orthologs have role in clathrin-dependent endocytosis and actin cortical patch localization		F-BAR domain protein Bzz1
Cons_CM-specific	orbh_6019	0	0	2	2	4	2	4	4	0	6	6	1	-	Agabi_varbisH97_2_114327	Armosto1_269576	Auramp1_548737			Mk_00800600	PleosPC15_2_1062448		Schco3_2662483	IPR017972::Cytochrome P450; conserved site::6	IPR001128::Cytochrome P450::6	IPR036396::Cytochrome P450 superfamily::6	IPR002401::Cytochrome P450; E-class; group I::3	IPR002403::Cytochrome P450; E-class; group IV::3
Cons_CM-specific	orbh_5420	0	2	4	1	2	4	2	2	0	7	6	0.857143	-	Agabi_varbisH97_2_193749	Armosto1_271109	Auramp1_502849			Mk_01398800	PleosPC15_2_1044935	Ptegra1_600576	Schco3_2614716	IPR001310::Histidine triad (HIT) protein::7	IPR011146::HIT-like domain::7	IPR036265::HIT-like superfamily::7
Cons_CM-specific	orbh_6141	0	2	0	2	2	2	4	4	0	6	6	1	-	Agabi_varbisH97_2_195424	Armosto1_252425	Auramp1_539275			Mk_01436600		Ptegra1_565298	Schco3_2512873	IPR003719::Phezine biosynthesis PhzF protein::6
Cons_CM-specific	orbh_6168	0	4	0	2	2	2	2	4	0	6	6	1	-	Agabi_varbisH97_2_205695	Armosto1_265290	Auramp1_454406			Mk_01100800		Ptegra1_606524	Schco3_2618966	IPR027417::P-loop containing nucleoside triphosphate hydrolase::6	IPR036465::von Willebrand factor A-like domain superfamily::5	IPR002035::von Willebrand factor; type A::5	IPR008803::RHD3/Sey1::2
Cons_CM-specific	orbh_6441	0	2	2	4	2	4	2	0	0	6	6	1	-		Armosto1_251603	Auramp1_506788			Mk_01076500	PleosPC15_2_1105521	Ptegra1_604564	Schco3_2006874	IPR002347::Short-chain dehydrogese/reductase SDR::6	IPR036291::D(P)-binding domain superfamily::6
Cons_CM-specific	orbh_5258	0	2	4	2	2	1	2	2	0	7	6	0.857143	-	Agabi_varbisH97_2_134651	Armosto1_270965	Auramp1_549969			Mk_00436000	PleosPC15_2_1031042	Ptegra1_590830	Schco3_2671624	IPR012312::Haemerythrin-like::5
Cons_CM-specific	orbh_4204	0	1	4	4	1	1	4	4	4	8	5	0.625	-	Agabi_varbisH97_2_195528	Armosto1_258303	Auramp1_404411	Copci_AmutBmut1_196908		Mk_00207800	PleosPC15_2_1074654	Ptegra1_589847	Schco3_2673722	IPR005786::Branched-chain amino acid aminotransferase II::8	IPR036038::Aminotransferase-like; PLP-dependent enzymes::8	IPR043132::Branched-chain-amino-acid aminotransferase-like; C-termil::8	IPR043131::Branched-chain-amino-acid aminotransferase-like; N-termil::8	IPR001544::Aminotransferase class IV::8	IPR033939::Branched-chain aminotransferase::7	IPR018300::Aminotransferase; class IV; conserved site::5				97	eca39_pombe			branched chain amino acid aminotransferase Eca39
Cons_CM-specific	orbh_4976	0	1	4	4	1	1	4	4	4	8	5	0.625	-	Agabi_varbisH97_2_192751	Armosto1_259344	Auramp1_399888	Copci_AmutBmut1_476698		Mk_00315400	PleosPC15_2_1093467	Ptegra1_510732	Schco3_2625627	IPR017853::Glycoside hydrolase superfamily::8										124
Cons_CM-specific	orbh_5137	0	1	4	4	4	1	1	4	4	8	5	0.625	-	Agabi_varbisH97_2_188283	Armosto1_259600	Auramp1_488900	Copci_AmutBmut1_539391		Mk_00843100	PleosPC15_2_1102167	Ptegra1_516452	Schco3_1088873	IPR005123::Oxoglutarate/iron-dependent dioxygese::8										29
Cons_CM-specific	orbh_5732	0	1	4	4	1	4	4	0	4	7	5	0.714286	-		Armosto1_262563	Auramp1_564899	Copci_AmutBmut1_368611		Mk_00968500	PleosPC15_2_62436	Ptegra1_569874	Schco3_2364606	IPR002401::Cytochrome P450; E-class; group I::7	IPR001128::Cytochrome P450::7	IPR036396::Cytochrome P450 superfamily::7								231	AN8338_CYP671A1_Aspnid	Uncharacterized ORF Putative cytochrome P450
Cons_CM-specific	orbh_6271	0	1	4	4	0	0	4	4	4	6	5	0.833333	-	Agabi_varbisH97_2_208687	Armosto1_254866		Copci_AmutBmut1_462684		Mk_00633100	PleosPC15_2_174865	Ptegra1_550959		IPR023631::Amidase sigture domain::6	IPR036928::Amidase sigture (AS) superfamily::6									266	AN9138_Aspnid NCU08356_Neucr	Uncharacterized ORF Putative amidase/acetamidase
Cons_CM-specific	orbh_6598	0	0	4	0	4	4	0	4	4	5	5	1	-	Agabi_varbisH97_2_121495		Auramp1_438334	Copci_AmutBmut1_450751			PleosPC15_2_1108252		Schco3_2692297	IPR041588::Integrase zinc-binding domain::3										19
Cons_CM-specific	orbh_6651	0	0	4	4	0	0	4	4	4	5	5	1	-	Agabi_varbisH97_2_190616	Armosto1_266801		Copci_AmutBmut1_110021		Mk_01051500	PleosPC15_2_1087944			IPR004136::Nitrote monooxygese::5	IPR013785::Aldolase-type TIM barrel::5									102	NCU09931_Neucr
Cons_CM-specific	orbh_2861	1	1	4	1	1	2	4	4	4	9	5	0.625	-	Agabi_varbisH97_2_68708	Armosto1_261698	Auramp1_564968	Copci_AmutBmut1_546749	Cryne_JEC21_1_543	Mk_00085100	PleosPC15_2_1112279	Ptegra1_569112	Schco3_2263302	IPR003807::Domain of unknown function DUF202::9										407	YER072W_VTC1_Sacce1 AN1334_Aspnid NCU03883_Neucr nrf1_pombe	Uncharacterized ORF Orthologs have GTPase regulator activity; mR binding activity		vacuolar transporter chaperone (VTC) complex; GTPase regulator subunit Nrf1	Subunit of the vacuolar transporter chaperone (VTC) complex; VTC complex is involved in membrane trafficking; vacuolar polyphosphate accumulation; microautophagy and non-autophagic vacuolar fusion; also has mR binding activity; protein abundance increases in response to D replication stress
Cons_CM-specific	orbh_3547	0	1	4	1	4	1	4	4	2	8	5	0.625	-	Agabi_varbisH97_2_119340	Armosto1_270546	Auramp1_544891	Copci_AmutBmut1_376388		Mk_00628700	PleosPC15_2_1094185	Ptegra1_612562	Schco3_2498556	IPR000262::FMN-dependent dehydrogese::8	IPR037396::FMN hydroxy acid dehydrogese domain::8	IPR008259::FMN-dependent alpha-hydroxy acid dehydrogese; active site::7	IPR012133::Alpha-hydroxy acid dehydrogese; FMN-dependent::7	IPR013785::Aldolase-type TIM barrel::3						292	SPAPB1A11.03_pombe NCU04539_Neucr AN8744_Aspnid	Uncharacterized ORF Has domains with predicted catalytic activity; oxidoreductase activity		cytochrome b2 (L-lactate cytochrome-c oxidoreductase) (predicted)
Cons_CM-specific	orbh_4481	0	1	4	2	1	1	4	4	4	8	5	0.625	-	Agabi_varbisH97_2_220271	Armosto1_261690	Auramp1_480846	Copci_AmutBmut1_57055		Mk_00105900	PleosPC15_2_50427	Ptegra1_569186	Schco3_2623092	IPR029021::Protein-tyrosine phosphatase-like::8	IPR020422::Dual specificity protein phosphatase domain::8	IPR000340::Dual specificity phosphatase; catalytic domain::8	IPR000387::Tyrosine specific protein phosphatases domain::8	IPR016130::Protein-tyrosine phosphatase; active site::6						103
Cons_CM-specific	orbh_6447	0	2	4	0	4	1	4	0	4	6	5	0.833333	-		Armosto1_258693	Auramp1_537029	Copci_AmutBmut1_487524			PleosPC15_2_173917	Ptegra1_121805	Schco3_1168136	IPR009311::Interferon alpha-inducible protein IFI6/IFI27-like::2	IPR038213::IFI6/IFI27-like domain superfamily::2									1
Cons_CM-specific	orbh_6540	0	0	4	0	1	4	4	2	4	6	5	0.833333	-	Agabi_varbisH97_2_203340	Armosto1_261758	Auramp1_423922	Copci_AmutBmut1_503075			PleosPC15_2_1092917		Schco3_2498450	IPR011059::Metal-dependent hydrolase; composite domain superfamily::6	IPR032466::Metal-dependent hydrolase::6	IPR006680::Amidohydrolase-related::5								61
Cons_CM-specific	orbh_5112	0	1	4	4	2	1	4	1	4	8	5	0.625	-	Agabi_varbisH97_2_178049	Armosto1_255536	Auramp1_512449	Copci_AmutBmut1_446840		Mk_00700500	PleosPC15_2_1045544	Ptegra1_538559	Schco3_2619317	IPR029062::Class I glutamine amidotransferase-like::8	IPR002818::DJ-1/PfpI::8
Cons_CM-specific	orbh_5325	0	1	4	4	4	2	4	1	0	7	5	0.714286	-	Agabi_varbisH97_2_184905	Armosto1_261071	Auramp1_451451			Mk_00026000	PleosPC15_2_26524	Ptegra1_531630	Schco3_2645722	IPR000073::Alpha/beta hydrolase fold-1::7	IPR029058::Alpha/Beta hydrolase fold::7	IPR000639::Epoxide hydrolase-like::5
Cons_CM-specific	orbh_66280	0	1	4	0	4	4	2	4	0	6	5	0.833333	-	Agabi_varbisH97_2_201549	Armosto1_252940	Auramp1_550719				PleosPC15_2_34087	Ptegra1_611311	Schco3_2641678	IPR007371::Thiamin pyrophosphokise; catalytic domain::6	IPR007373::Thiamin pyrophosphokise; thiamin-binding domain::6	IPR036759::Thiamin pyrophosphokise; catalytic domain superfamily::6	IPR006282::Thiamin pyrophosphokise::6	IPR036371::Thiamin pyrophosphokise; thiamin-binding domain superfamily::6	IPR016966::Thiamin pyrophosphokise; eukaryotic::5
Cons_CM-specific	orbh_67143	0	2	4	0	4	4	4	0	0	5	5	1	-		Armosto1_250432	Auramp1_14776				PleosPC15_2_1056338	Ptegra1_505182	Schco3_2508594	IPR001461::Aspartic peptidase A1 family::5	IPR021109::Aspartic peptidase domain superfamily::5	IPR033121::Peptidase family A1 domain::5	IPR034164::Pepsin-like domain::5	IPR001969::Aspartic peptidase; active site::3
Cons_CM-specific	orbh_4424	0	1	4	4	1	1	4	2	4	8	5	0.625	-	Agabi_varbisH97_2_212070	Armosto1_262610	Auramp1_480698	Copci_AmutBmut1_371811		Mk_01360100	PleosPC15_2_1096743	Ptegra1_566586	Schco3_2498569	IPR029021::Protein-tyrosine phosphatase-like::8	IPR020422::Dual specificity protein phosphatase domain::8	IPR016130::Protein-tyrosine phosphatase; active site::8	IPR000340::Dual specificity phosphatase; catalytic domain::8	IPR000387::Tyrosine specific protein phosphatases domain::8						59
Cons_CM-specific	orbh_4594	0	1	1	4	1	4	4	2	4	8	5	0.625	-	Agabi_varbisH97_2_64740	Armosto1_258521	Auramp1_273228	Copci_AmutBmut1_461862		Mk_01037400	PleosPC15_2_16291	Ptegra1_496643	Schco3_2608091	IPR000898::Indoleamine 2;3-dioxygese::8	IPR037217::Tryptophan/Indoleamine 2;3-dioxygese-like::8									120
Cons_CM-specific	orbh_4685	0	1	4	4	1	1	4	2	4	8	5	0.625	-	Agabi_varbisH97_2_79526	Armosto1_250222	Auramp1_563137	Copci_AmutBmut1_494468		Mk_00693000	PleosPC15_2_1071168	Ptegra1_573421	Schco3_2632607	IPR019317::Brain protein I3::6										99
Cons_CM-specific	orbh_5001	0	1	4	4	1	2	1	4	4	8	5	0.625	-	Agabi_varbisH97_2_191444	Armosto1_271951	Auramp1_491653	Copci_AmutBmut1_366605		Mk_00372700	PleosPC15_2_1109402	Ptegra1_563991	Schco3_2643025	IPR012132::Glucose-methanol-choline oxidoreductase::8	IPR000172::Glucose-methanol-choline oxidoreductase; N-termil::8	IPR036188::FAD/D(P)-binding domain superfamily::8	IPR007867::Glucose-methanol-choline oxidoreductase; C-termil::8							79
Cons_CM-specific	orbh_5451	0	0	2	4	1	4	4	1	4	7	5	0.714286	-	Agabi_varbisH97_2_195772	Armosto1_262254	Auramp1_394535	Copci_AmutBmut1_358430		Mk_00122200	PleosPC15_2_1039782		Schco3_2499350	IPR015366::Peptidase S53; activation domain::7	IPR023828::Peptidase S8; subtilisin; Ser-active site::7	IPR036852::Peptidase S8/S53 domain superfamily::7	IPR030400::Sedolisin domain::7	IPR000209::Peptidase S8/S53 domain::2						290	AN7159_Aspnid NCU08418_Neucr	Uncharacterized ORF Orthologs have exopeptidase activity; tripeptidyl-peptidase activity
Cons_CM-specific	orbh_5636	0	1	4	4	2	1	4	0	4	7	5	0.714286	-		Armosto1_253099	Auramp1_491149	Copci_AmutBmut1_422236		Mk_00406500	PleosPC15_2_46323	Ptegra1_594894	Schco3_2627172	IPR001952::Alkaline phosphatase::7	IPR017850::Alkaline-phosphatase-like; core domain superfamily::7									298	pho-2_Neucr SPBC14F5.13c_pombe AN2493_Aspnid YDR481C_PHO8_Sacce1	Uncharacterized ORF Putative alkaline phosphatase with a predicted role in folate biosynthesis or gluconic acid and glucote metabolism		vacuolar membrane alkaline phosphatase (predicted)	Plasma membrane +/Pi cotransporter; active in early growth phase; similar to phosphate transporters of Neurospora crassa; transcription regulated by inorganic phosphate concentrations and Pho4p; mutations in related human transporter genes hPit1 and hPit2 are associated with hyperphosphatemia-induced calcification of vascular tissue and familial idiopathic basal ganglia calcification
Cons_CM-specific	orbh_5767	0	0	4	4	4	1	2	1	4	7	5	0.714286	-	Agabi_varbisH97_2_181140	Armosto1_267268	Auramp1_506468	Copci_AmutBmut1_77430		Mk_01366900	PleosPC15_2_1031971		Schco3_2604335	IPR029068::Glyoxalase/Bleomycin resistance protein/Dihydroxybiphenyl dioxygese::6	IPR025870::Glyoxalase-like domain::6									225	AN0378_Aspnid	Uncharacterized ORF
Cons_CM-specific	orbh_66203	0	1	4	4	2	1	4	0	4	7	5	0.714286	-		Armosto1_251063	Auramp1_565889	Copci_AmutBmut1_461642		Mk_01132000	PleosPC15_2_1077263	Ptegra1_580778	Schco3_2668796	IPR024528::Threonine/Serine exporter; ThrE::7	IPR010619::Putative threonine/serine exporter::7									327	SPAC7D4.12c_pombe PRM10_candida AN3143_Aspnid CAWG_05545_candida YJL108C_PRM10_Sacce1	Uncharacterized ORF	Protein of unknown function	plasma membrane ThrE amino acid transmembrane transporter family protein (predicted)	Pheromone-regulated protein; proposed to be involved in mating; predicted to have 5 transmembrane segments; induced by treatment with 8-methoxypsoralen and UVA irradiation
Cons_CM-specific	orbh_6261	0	2	0	4	1	4	4	0	4	6	5	0.833333	-		Armosto1_253381	Auramp1_492165	Copci_AmutBmut1_479225		Mk_00312700		Ptegra1_604084	Schco3_2642621	IPR019378::GDP-fucose protein O-fucosyltransferase::2										66
Cons_CM-specific	orbh_4657	0	1	4	1	1	4	4	4	1	8	4	0.5	-	Agabi_varbisH97_2_73914	Armosto1_251783	Auramp1_563901	Copci_AmutBmut1_498201		Mk_00998600	PleosPC15_2_158699	Ptegra1_595159	Schco3_2589135	IPR032675::Leucine-rich repeat domain superfamily::3										44
Cons_CM-specific	orbh_4852	0	1	4	1	1	1	4	4	4	8	4	0.5	-	Agabi_varbisH97_2_203820	Armosto1_264807	Auramp1_506826	Copci_AmutBmut1_428944		Mk_00903700	PleosPC15_2_154709	Ptegra1_597496	Schco3_2604699	IPR002347::Short-chain dehydrogese/reductase SDR::8	IPR036291::D(P)-binding domain superfamily::8									230
Cons_CM-specific	orbh_5013	0	1	4	1	4	1	4	4	1	8	4	0.5	-	Agabi_varbisH97_2_194636	Armosto1_251599	Auramp1_511153	Copci_AmutBmut1_466153		Mk_00506200	PleosPC15_2_1109712	Ptegra1_535400	Schco3_2641508	IPR002347::Short-chain dehydrogese/reductase SDR::8	IPR036291::D(P)-binding domain superfamily::8	IPR020904::Short-chain dehydrogese/reductase; conserved site::6								77
Cons_CM-specific	orbh_6815	0	0	0	1	4	4	4	0	4	5	4	0.8	-		Armosto1_261849	Auramp1_480465	Copci_AmutBmut1_467882		Mk_00071300			Schco3_12791	IPR027417::P-loop containing nucleoside triphosphate hydrolase::4	IPR022812::Dymin superfamily::4									157	NCU06980_Neucr
Cons_CM-specific	orbh_7551	0	0	4	0	4	4	0	0	4	4	4	1	-			Auramp1_556736	Copci_AmutBmut1_368552			PleosPC15_2_1102446		Schco3_2560780	IPR015421::Pyridoxal phosphate-dependent transferase; major domain::4	IPR002129::Pyridoxal phosphate-dependent decarboxylase::4	IPR015424::Pyridoxal phosphate-dependent transferase::4								110
Cons_CM-specific	orbh_5535	0	1	4	4	4	1	4	1	0	7	4	0.571429	-	Agabi_varbisH97_2_212363	Armosto1_269613	Auramp1_426121			Mk_01287100	PleosPC15_2_166434	Ptegra1_591504	Schco3_2307907	IPR033121::Peptidase family A1 domain::7	IPR001461::Aspartic peptidase A1 family::7	IPR021109::Aspartic peptidase domain superfamily::7	IPR034164::Pepsin-like domain::7	IPR001969::Aspartic peptidase; active site::6
Cons_CM-specific	orbh_66446	0	0	4	1	4	1	4	4	0	6	4	0.666667	-	Agabi_varbisH97_2_175594	Armosto1_264138	Auramp1_569149			Mk_00035600	PleosPC15_2_1105502		Schco3_2630249	IPR005123::Oxoglutarate/iron-dependent dioxygese::6	IPR027443::Isopenicillin N synthase-like::6	IPR026992::Non-haem dioxygese N-termil domain::6
Cons_CM-specific	orbh_6647	0	1	4	0	4	4	0	4	0	5	4	0.8	-	Agabi_varbisH97_2_189583		Auramp1_486393				PleosPC15_2_1101810	Ptegra1_603119	Schco3_2610599	IPR036291::D(P)-binding domain superfamily::5	IPR013116::Ketol-acid reductoisomerase; N-termil::5	IPR008927::6-phosphoglucote dehydrogese-like; C-termil domain superfamily::5	IPR000506::Ketol-acid reductoisomerase; C-termil::5	IPR013023::Ketol-acid reductoisomerase::5
Cons_CM-specific	orbh_7218	0	0	0	4	0	0	4	4	4	4	4	1	-	Agabi_varbisH97_2_194055	Armosto1_253291		Copci_AmutBmut1_493277		Mk_00299800				IPR002227::Tyrosise copper-binding domain::4	IPR041640::Tyosise; C-termil::4	IPR008922::Uncharacterised domain; di-copper centre::4	IPR016216::Monophenol monooxygese; fungi::3
Cons_CM-specific	orbh_7768	0	0	4	4	0	4	4	0	0	4	4	1	-		Armosto1_268559				Mk_00821300	PleosPC15_2_166150		Schco3_2684336	IPR017986::WD40-repeat-containing domain::1	IPR001680::WD40 repeat::1	IPR036322::WD40-repeat-containing domain superfamily::1	IPR015943::WD40/YVTN repeat-like-containing domain superfamily::1
Cons_CM-specific	orbh_4230	0	1	4	4	1	1	4	1	4	8	4	0.5	-	Agabi_varbisH97_2_196141	Armosto1_255994	Auramp1_551615	Copci_AmutBmut1_379071		Mk_00543000	PleosPC15_2_1068209	Ptegra1_613092	Schco3_2641582	IPR035994::Nucleoside phosphorylase superfamily::8	IPR000845::Nucleoside phosphorylase domain::8									152
Cons_CM-specific	orbh_4380	0	1	4	4	1	1	4	1	4	8	4	0.5	-	Agabi_varbisH97_2_208895	Armosto1_270946	Auramp1_392819	Copci_AmutBmut1_369322		Mk_01424700	PleosPC15_2_1086936	Ptegra1_562165	Schco3_2507190	IPR011992::EF-hand domain pair::5										95
Cons_CM-specific	orbh_5548	0	1	4	4	1	1	0	4	4	7	4	0.571429	-	Agabi_varbisH97_2_220066		Auramp1_104263	Copci_AmutBmut1_153191		Mk_00769400	PleosPC15_2_1076097	Ptegra1_560921	Schco3_1221126	IPR000182::GT domain::7	IPR016181::Acyl-CoA N-acyltransferase::7									166
Cons_CM-specific	orbh_4808	0	4	4	4	4	4	4	4	4	8	8	1	-	Agabi_varbisH97_2_192814	Armosto1_261024	Auramp1_392198	Copci_AmutBmut1_499734		Mk_01084700	PleosPC15_2_1097095	Ptegra1_599364	Schco3_2631112	IPR039556::ICL/PEPM domain::8	IPR040442::Pyruvate kise-like domain superfamily::8	IPR018523::Isocitrate lyase/phosphorylmutase; conserved site::8	IPR015813::Pyruvate/Phosphoenolpyruvate kise-like domain superfamily::8							263	mig-11_Neucr AN3805_Aspnid	Uncharacterized ORF Putative oxaloacetase with a predicted role in oxalic acid metabolism protein expressed at decreased levels in a hapX mutant versus wild-type
Cons_CM-specific	orbh_4006	0	2	4	1	4	4	2	4	4	8	7	0.875	-	Agabi_varbisH97_2_191066	Armosto1_257086	Auramp1_454602	Copci_AmutBmut1_361522		Mk_00306300	PleosPC15_2_1078793	Ptegra1_510391	Schco3_2626947	IPR011051::RmlC-like cupin domain superfamily::8	IPR014710::RmlC-like jelly roll fold::8	IPR006045::Cupin 1::8	IPR017774::Bicupin; oxalate decarboxylase/oxidase::8							291	AN8099_Aspnid NCU00865_Neucr	Uncharacterized ORF Putative oxalate decarboxylase with a predicted role in oxalic acid metabolism
Cons_CM-specific	orbh_5845	0	0	2	4	4	4	4	2	4	7	7	1	-	Agabi_varbisH97_2_225837	Armosto1_268607	Auramp1_475631	Copci_AmutBmut1_363743		Mk_01081300	PleosPC15_2_35783		Schco3_2691273	IPR005804::Fatty acid desaturase domain::7	IPR021863::Fatty acid desaturase; N-termil::2									47
Cons_CM-specific	orbh_5169	0	1	4	4	1	4	2	4	4	8	6	0.75	-	Agabi_varbisH97_2_195360	Armosto1_252991	Auramp1_509585	Copci_AmutBmut1_398037		Mk_00518800	PleosPC15_2_1085502	Ptegra1_607418	Schco3_2517480	IPR019791::Haem peroxidase; animal-type::8	IPR010255::Haem peroxidase superfamily::8	IPR036396::Cytochrome P450 superfamily::7	IPR034812::Psi-factor producing oxygese; N-termil heme peroxidase domain::7	IPR037120::Haem peroxidase domain superfamily; animal type::5	IPR001128::Cytochrome P450::3					167
Cons_CM-specific	orbh_3660	0	1	4	1	4	2	4	2	4	8	6	0.75	-	Agabi_varbisH97_2_143643	Armosto1_265213	Auramp1_489087	Copci_AmutBmut1_423716		Mk_01442800	PleosPC15_2_1065994	Ptegra1_589924	Schco3_2619114	IPR010255::Haem peroxidase superfamily::8	IPR019791::Haem peroxidase; animal-type::8	IPR037120::Haem peroxidase domain superfamily; animal type::8	IPR034812::Psi-factor producing oxygese; N-termil heme peroxidase domain::7	IPR036396::Cytochrome P450 superfamily::5	IPR001128::Cytochrome P450::2					262	AN5028_ppoC_Aspnid NCU05858_Neucr	Verified ORF Fatty acid oxygese that plays a role in oxylipin biosynthesis responsible for the formation of the psi-factor component psiB-beta expression reduced after exposure to farnesol
Cons_CM-specific	orbh_5555	0	0	4	1	2	1	4	4	4	7	5	0.714286	-	Agabi_varbisH97_2_226540	Armosto1_271966	Auramp1_565657	Copci_AmutBmut1_471478		Mk_00945200	PleosPC15_2_20265		Schco3_2629948	IPR005804::Fatty acid desaturase domain::7										117
Cons_CM-specific	orbh_5452	0	2	4	1	1	0	4	4	4	7	5	0.714286	-	Agabi_varbisH97_2_195798	Armosto1_262338	Auramp1_394661	Copci_AmutBmut1_214528		Mk_00905000	PleosPC15_2_176123	Ptegra1_606309		IPR036786::Ribosome maturation protein SBDS; N-termil domain superfamily::7	IPR019783::Ribosome maturation protein SBDS; N-termil::6	IPR039100::Ribosome maturation protein Sdo1/SBDS-like::6								209	SPBC21C3.19_pombe NCU02765_Neucr			SBDS family protein Rtc3 (predicted)
Cons_CM-specific	orbh_3767	0	2	4	4	2	1	2	1	4	8	6	0.75	-	Agabi_varbisH97_2_180117	Armosto1_256402	Auramp1_505333	Copci_AmutBmut1_441187		Mk_00606400	PleosPC15_2_45869	Ptegra1_554348	Schco3_2588193	IPR000552::Ribosomal protein L44e::8	IPR011332::Zinc-binding ribosomal protein::8									374	NCU00706_Neucr YHR141C_RPL42B_Sacce1 YNL162W_RPL42A_Sacce1 AN6181_Aspnid rpl42_pombe	Uncharacterized ORF Orthologs have cytosolic large ribosomal subunit localization		60S ribosomal protein L36/L42	Ribosomal 60S subunit protein L42A; homologous to mammalian ribosomal protein L36A; no bacterial homolog; RPL42A has a paralog; RPL42B; that arose from the whole genome duplication
Cons_CM-specific	orbh_5265	0	2	4	0	2	1	2	2	4	7	6	0.857143	-	Agabi_varbisH97_2_138985	Armosto1_258498	Auramp1_509580	Copci_AmutBmut1_398047			PleosPC15_2_1068380	Ptegra1_574076	Schco3_2642422	IPR038464::Ribosomal protein L38e superfamily::7	IPR002675::Ribosomal protein L38e::7									396	AN11419_Aspnid rpl3801_pombe YLR325C_RPL38_Sacce1	Uncharacterized ORF Orthologs have cytosolic large ribosomal subunit; hyphal cell wall; yeast-form cell wall localization		60S ribosomal protein L38 (predicted)	Mitochondrial ribosomal protein of the large subunit; appears as two protein spots (YmL34 and YmL38) on two-dimensiol SDS gels; protein abundance increases in response to D replication stress
Cons_CM-specific	orbh_3756	0	2	4	2	4	4	4	4	4	8	8	1	-	Agabi_varbisH97_2_179373	Armosto1_270824	Auramp1_504269	Copci_AmutBmut1_479562		Mk_00891200	PleosPC15_2_1097562	Ptegra1_604463	Schco3_2725355	IPR036305::RGS domain superfamily::8										75
Cons_CM-specific	orbh_114	1	2	4	2	2	4	4	2	4	9	8	1	X	Agabi_varbisH97_2_118110	Armosto1_265312	Auramp1_544518	Copci_AmutBmut1_493180	Cryne_JEC21_1_5587	Mk_00704500	PleosPC15_2_1076762	Ptegra1_567220	Schco3_2601543	IPR011009::Protein kise-like domain superfamily::9	IPR008271::Serine/threonine-protein kise; active site::9	IPR000719::Protein kise domain::9	IPR017441::Protein kise; ATP binding site::9							88
Cons_CM-specific	orbh_4190	0	2	4	4	2	2	4	2	4	8	8	1	-	Agabi_varbisH97_2_195142	Armosto1_271767	Auramp1_140168	Copci_AmutBmut1_472370		Mk_01129500	PleosPC15_2_177041	Ptegra1_281742	Schco3_1240411	IPR001876::Zinc finger; RanBP2-type::8	IPR036443::Zinc finger; RanBP2-type superfamily::8	IPR034870::TAF15/EWS/TLS family::5								48
Cons_CM-specific	orbh_3322	1	2	2	2	2	2	4	2	2	9	8	1	-	Agabi_varbisH97_2_116595	Armosto1_253254	Auramp1_492288	Copci_AmutBmut1_497308	Cryne_JEC21_1_2554	Mk_00182200	PleosPC15_2_1056567	Ptegra1_626626	Schco3_2519304	IPR011009::Protein kise-like domain superfamily::9	IPR000719::Protein kise domain::9	IPR017441::Protein kise; ATP binding site::7	IPR008271::Serine/threonine-protein kise; active site::2							82
Cons_CM-specific	orbh_3457	0	2	4	4	4	4	4	1	4	8	7	0.875	-	Agabi_varbisH97_2_223080	Armosto1_264892	Auramp1_216813	Copci_AmutBmut1_397547		Mk_01432300	PleosPC15_2_1044044	Ptegra1_283335	Schco3_2535527	IPR000719::Protein kise domain::7	IPR008271::Serine/threonine-protein kise; active site::7	IPR011009::Protein kise-like domain superfamily::7	IPR017441::Protein kise; ATP binding site::6							64
Cons_CM-specific	orbh_4470	0	1	4	4	4	2	2	4	4	8	7	0.875	-	Agabi_varbisH97_2_218308	Armosto1_253175	Auramp1_491497	Copci_AmutBmut1_473465		Mk_00377400	PleosPC15_2_1047752	Ptegra1_552565	Schco3_2627391	IPR014752::Arrestin; C-termil::7										93
Cons_CM-specific	orbh_5493	0	4	4	0	4	4	4	2	2	7	7	1	-	Agabi_varbisH97_2_204544	Armosto1_250249	Auramp1_500752	Copci_AmutBmut1_538093			PleosPC15_2_61744	Ptegra1_502118	Schco3_2606202	IPR000719::Protein kise domain::7	IPR017441::Protein kise; ATP binding site::7	IPR011009::Protein kise-like domain superfamily::7	IPR008271::Serine/threonine-protein kise; active site::6							136
Cons_CM-specific	orbh_1383	1	2	4	2	2	4	4	1	4	9	7	0.875	-	Agabi_varbisH97_2_191944	Armosto1_261562	Auramp1_481220	Copci_AmutBmut1_451611	Cryne_JEC21_1_121	Mk_00075700	PleosPC15_2_61429	Ptegra1_183164	Schco3_2623509	IPR011009::Protein kise-like domain superfamily::9	IPR000719::Protein kise domain::9	IPR008271::Serine/threonine-protein kise; active site::9								336	YLR248W_RCK2_Sacce1 camk-4_Neucr; Aspnid_cmkD	Predicted protein serine/threonine kise; part of HogA mitogen-activated protein kise (MAPK) sigling pathway; involved in regulation of stress response and development			Protein kise involved in response to oxidative and osmotic stress; identified as suppressor of S. pombe cell cycle checkpoint mutations; similar to CaM (calmodulin) kises; RCK2 has a paralog; RCK1; that arose from the whole genome duplication
Cons_CM-specific	orbh_6359	0	2	4	0	4	4	4	0	4	6	6	1	-		Armosto1_268469	Auramp1_627941	Copci_AmutBmut1_357261			PleosPC15_2_49595	Ptegra1_559307	Schco3_2684163	IPR011009::Protein kise-like domain superfamily::6	IPR000719::Protein kise domain::6	IPR017441::Protein kise; ATP binding site::6	IPR000253::Forkhead-associated (FHA) domain::5	IPR008984::SMAD/FHA domain superfamily::5	IPR008271::Serine/threonine-protein kise; active site::3					16
Cons_CM-specific	orbh_5369	0	0	4	2	2	1	4	4	4	7	6	0.857143	-	Agabi_varbisH97_2_190498	Armosto1_265192	Auramp1_480146	Copci_AmutBmut1_175714		Mk_00999200	PleosPC15_2_1059795		Schco3_2622440	IPR008146::Glutamine synthetase; catalytic domain::7	IPR014746::Glutamine synthetase/guanido kise; catalytic domain::7	IPR036651::Glutamine synthetase; N-termil domain superfamily::4								111
Cons_CM-specific	orbh_4522	0	1	4	4	4	2	4	1	2	8	6	0.75	-	Agabi_varbisH97_2_224283	Armosto1_270719	Auramp1_502532	Copci_AmutBmut1_448193		Mk_00891500	PleosPC15_2_1078238	Ptegra1_603618	Schco3_1150677	IPR000719::Protein kise domain::8	IPR017441::Protein kise; ATP binding site::8	IPR011009::Protein kise-like domain superfamily::8								82
Cons_CM-specific	orbh_5279	1	2	4	0	4	2	4	2	0	7	6	1	-	Agabi_varbisH97_2_175794	Armosto1_269040	Auramp1_398569		Cryne_JEC21_1_6031		PleosPC15_2_1102071	Ptegra1_504398	Schco3_2490312	IPR014752::Arrestin; C-termil::7	IPR014756::Immunoglobulin E-set::7	IPR011022::Arrestin C-termil-like domain::6
Cons_CM-specific	orbh_5158	0	2	4	4	1	1	4	1	4	8	5	0.625	-	Agabi_varbisH97_2_117367	Armosto1_262852	Auramp1_629368	Copci_AmutBmut1_464731		Mk_01363400	PleosPC15_2_1009206	Ptegra1_512946	Schco3_2693547	IPR040976::Fungal-type protein kise::8	IPR011009::Protein kise-like domain superfamily::8	IPR000719::Protein kise domain::3								44
Cons_CM-specific	orbh_6657	0	0	4	1	0	0	4	4	4	5	4	0.8	-	Agabi_varbisH97_2_192254	Armosto1_254285		Copci_AmutBmut1_152667		Mk_01191900	PleosPC15_2_1093926			IPR007269::Isoprenylcysteine carboxyl methyltransferase::4	IPR007318::Phospholipid methyltransferase::1									62
Cons_CM-specific	orbh_4309	0	1	4	2	4	4	4	4	4	8	7	0.875	-	Agabi_varbisH97_2_202648	Armosto1_258344	Auramp1_570776	Copci_AmutBmut1_446258		Mk_00301700	PleosPC15_2_1047319	Ptegra1_550531	Schco3_2613213	IPR009081::Phosphopantetheine binding ACP domain::8	IPR036736::ACP-like superfamily::8	IPR016035::Acyl transferase/acyl hydrolase/lysophospholipase::8	IPR016036::Malonyl-CoA ACP transacylase; ACP-binding::8	IPR020841::Polyketide synthase; beta-ketoacyl synthase domain::8	IPR001227::Acyl transferase domain superfamily::8	IPR014043::Acyl transferase::8	IPR014031::Beta-ketoacyl synthase; C-termil::8	IPR042104::Polyketide synthase; dehydratase domain superfamily::8	IPR014030::Beta-ketoacyl synthase; N-termil::8	282	per-1_Neucr mdpG_Aspnid AN0150_mdpG_Aspnid	Verified ORF Polyketide synthase member of the monodictyphenone secondary metabolite biosynthesis gene cluster required for the synthesis of the xanthones (shamixanthone and epishamixanthone); emodin; arugosins; monodictyphenone; and related compounds
Cons_CM-specific	orbh_5271	0	1	4	0	4	1	4	4	4	7	5	0.714286	-	Agabi_varbisH97_2_149463	Armosto1_257664	Auramp1_568014	Copci_AmutBmut1_30510			PleosPC15_2_1047596	Ptegra1_554571	Schco3_2543097	IPR008949::Isoprenoid synthase domain superfamily::7	IPR034686::Terpene cyclase-like 2::7									85
Cons_CM-specific	orbh_4733	0	1	4	4	1	2	4	4	1	8	5	0.625	-	Agabi_varbisH97_2_208101	Armosto1_251835	Auramp1_274076	Copci_AmutBmut1_469738		Mk_00432000	PleosPC15_2_1061909	Ptegra1_573274	Schco3_2672288	IPR008949::Isoprenoid synthase domain superfamily::8	IPR034686::Terpene cyclase-like 2::7									76
Cons_CM-specific	orbh_4622	0	2	4	4	4	4	4	2	2	8	8	1	-	Agabi_varbisH97_2_68556	Armosto1_252943	Auramp1_479561	Copci_AmutBmut1_456276		Mk_00080500	PleosPC15_2_1089098	Ptegra1_499217	Schco3_2253810	IPR011009::Protein kise-like domain superfamily::8	IPR000719::Protein kise domain::8	IPR008271::Serine/threonine-protein kise; active site::8	IPR017441::Protein kise; ATP binding site::6							354	YPL026C_SKS1_Sacce1 ran1_pombe AN4935_ran1_Aspnid fi_Neucr	Verified ORF Predicted fimbrin protein a highly conserved protein that contains two actin-binding domains (ABD) and a predicted EF hand calcium-binding domain involved in hyphal polarity and conidiophore development medione-induced protein		C2 domain protein Fic1	Putative serine/threonine protein kise; involved in the adaptation to low concentrations of glucose independent of the SNF3 regulated pathway; SKS1 has a paralog; VHS1; that arose from the whole genome duplication
Cons_CM-specific	orbh_3853	0	1	4	4	2	1	4	1	4	8	5	0.625	-	Agabi_varbisH97_2_185247	Armosto1_250774	Auramp1_472583	Copci_AmutBmut1_448623		Mk_01452300	PleosPC15_2_1076969	Ptegra1_405515	Schco3_2604096	IPR036396::Cytochrome P450 superfamily::8	IPR001128::Cytochrome P450::8	IPR002401::Cytochrome P450; E-class; group I::6	IPR017972::Cytochrome P450; conserved site::3	IPR002403::Cytochrome P450; E-class; group IV::2						132	YDR402C_DIT2_Sacce1				N-formyltyrosine oxidase; sporulation-specific microsomal enzyme involved in the production of N;N-bisformyl dityrosine required for spore wall maturation; homologous to cytochrome P-450s
Cons_CM-specific	orbh_4536	0	1	4	4	2	1	4	1	4	8	5	0.625	-	Agabi_varbisH97_2_226615	Armosto1_253368	Auramp1_448717	Copci_AmutBmut1_546528		Mk_00985000	PleosPC15_2_1113463	Ptegra1_108952	Schco3_2643269	IPR036249::Thioredoxin-like superfamily::8	IPR004045::Glutathione S-transferase; N-termil::8	IPR036282::Glutathione S-transferase; C-termil domain superfamily::8	IPR010987::Glutathione S-transferase; C-termil-like::8	IPR004046::Glutathione S-transferase; C-termil::8	IPR040079::Glutathione Transferase family::5					111
Cons_CM-specific	orbh_1777	1	1	4	4	4	4	4	4	4	9	7	0.875	-	Agabi_varbisH97_2_195196	Armosto1_271878	Auramp1_408249	Copci_AmutBmut1_432313	Cryne_JEC21_1_2198	Mk_00297900	PleosPC15_2_1048474	Ptegra1_553584	Schco3_1160309	IPR006094::FAD linked oxidase; N-termil::9	IPR016169::FAD-binding; type PCMH; subdomain 2::9	IPR016167::FAD-binding; type PCMH; subdomain 1::9	IPR016166::FAD-binding domain; PCMH-type::9	IPR010031::L-gulonolactone/D-arabinono-1;4-lactone oxidase::9	IPR007173::D-arabinono-1;4-lactone oxidase::9	IPR036318::FAD-binding; type PCMH-like superfamily::9	IPR016171::Vanillyl-alcohol oxidase; C-termil subdomain 2::8	IPR030654::Sugar 1;4-lactone oxidase::2		404	AN0836_Aspnid YML086C_ALO1_Sacce1 ALO1_candida alo1_pombe	Uncharacterized ORF Orthologs have D-arabinono-1;4-lactone oxidase activity		D-arabinono-1;4-lactone oxidase (predicted)	D-Arabinono-1;4-lactone oxidase; catalyzes the fil step in biosynthesis of dehydro-D-arabinono-1;4-lactone; which is protective against oxidative stress
Cons_CM-specific	orbh_5396	0	2	0	4	2	1	2	4	4	7	6	0.857143	-	Agabi_varbisH97_2_192330	Armosto1_250065	Auramp1_390803	Copci_AmutBmut1_39451		Mk_00728300		Ptegra1_591856	Schco3_2511059	IPR036249::Thioredoxin-like superfamily::7	IPR002109::Glutaredoxin::7									99
Cons_CM-specific	orbh_1432	1	2	2	2	1	2	1	2	2	9	6	0.75	-	Agabi_varbisH97_2_192329	Armosto1_250115	Auramp1_476618	Copci_AmutBmut1_415694	Cryne_JEC21_1_2802	Mk_00732300	PleosPC15_2_1042143	Ptegra1_565360	Schco3_2450442	IPR014025::Glutaredoxin subgroup::9	IPR036249::Thioredoxin-like superfamily::9	IPR002109::Glutaredoxin::9	IPR011899::Glutaredoxin; eukaryotic/virial::2							164	YDL010W_GRX6_Sacce1				Cis-golgi localized monothiol glutaredoxin; binds Fe-S cluster; more similar in activity to dithiol than other monothiol glutaredoxins; involved in the oxidative stress response; GRX6 has a paralog; GRX7; that arose from the whole genome duplication
Cons_CM-specific	orbh_5502	0	0	4	1	4	4	4	4	4	7	6	0.857143	-	Agabi_varbisH97_2_205955	Armosto1_257135	Auramp1_251161	Copci_AmutBmut1_423239		Mk_00763500	PleosPC15_2_1053318		Schco3_2579844	IPR002068::Alpha crystallin/Hsp20 domain::7	IPR031107::Small heat shock protein HSP20::7	IPR008978::HSP20-like chaperone::7								87	hsp16_pombe			heat shock protein Hsp16
Cons_CM-specific	orbh_3576	0	1	4	2	1	2	4	4	4	8	6	0.75	-	Agabi_varbisH97_2_122146	Armosto1_271164	Auramp1_547473	Copci_AmutBmut1_444300		Mk_00103200	PleosPC15_2_1059662	Ptegra1_573464	Schco3_2627407	IPR036249::Thioredoxin-like superfamily::8	IPR013740::Redoxin::8	IPR037944::Peroxiredoxin-5-like::8	IPR013766::Thioredoxin domain::8							385	AN8080_Aspnid NCU03151_Neucr YLR109W_AHP1_Sacce1	Uncharacterized ORF Orthologs have thioredoxin peroxidase activity; role in cell redox homeostasis; cellular response to oxidative stress; response to metal ion and cytoplasm; hyphal cell wall; intracellular; peroxisome; yeast-form cell wall localization			Thiol-specific peroxiredoxin; reduces hydroperoxides to protect against oxidative damage; function in vivo requires covalent conjugation to Urm1p
Cons_CM-specific	orbh_6596	0	0	4	4	0	0	4	2	4	5	5	1	-	Agabi_varbisH97_2_121172	Armosto1_254016		Copci_AmutBmut1_496981		Mk_00292500	PleosPC15_2_1069239			IPR002068::Alpha crystallin/Hsp20 domain::5	IPR008978::HSP20-like chaperone::5									38
Cons_CM-specific	orbh_66156	0	4	0	4	2	0	4	0	4	5	5	1	-		Armosto1_251377	Auramp1_402220	Copci_AmutBmut1_443932		Mk_00319500		Ptegra1_565692		IPR036629::YjbJ superfamily::3	IPR008462::CsbD-like domain::2									121
Cons_CM-specific	orbh_4519	0	2	2	4	2	1	4	4	4	8	7	0.875	-	Agabi_varbisH97_2_224104	Armosto1_270700	Auramp1_372024	Copci_AmutBmut1_458752		Mk_01393200	PleosPC15_2_1106249	Ptegra1_419836	Schco3_2493754	IPR001356::Homeobox domain::8	IPR009057::Homeobox-like domain superfamily::8	IPR008422::Homeobox KN domain::8								71
Cons_CM-specific	orbh_3432	0	2	4	4	1	1	4	4	2	8	6	0.75	-	Agabi_varbisH97_2_192331	Armosto1_250168	Auramp1_25500	Copci_AmutBmut1_438653		Mk_00727300	PleosPC15_2_51203	Ptegra1_414719	Schco3_2670197	IPR018608::Gti1/Pac2 family::8										95
Cons_CM-specific	orbh_3587	0	1	1	4	2	2	4	4	4	8	6	0.75	-	Agabi_varbisH97_2_122836	Armosto1_262607	Auramp1_407599	Copci_AmutBmut1_419773		Mk_00288700	PleosPC15_2_1024687	Ptegra1_555580	Schco3_2671352	IPR000679::Zinc finger; GATA-type::8	IPR013088::Zinc finger; NHR/GATA-type::8	IPR039355::Transcription factor GATA::8								12
Cons_CM-specific	orbh_4479	0	1	2	4	4	1	4	2	4	8	6	0.75	-	Agabi_varbisH97_2_219861	Armosto1_261449	Auramp1_451090	Copci_AmutBmut1_211795		Mk_00056000	PleosPC15_2_61458	Ptegra1_508876	Schco3_2624428	IPR007219::Transcription factor domain; fungi::8	IPR001138::Zn(2)-C6 fungal-type D-binding domain::7	IPR036864::Zn(2)-C6 fungal-type D-binding domain superfamily::7								121	SPAC139.03_pombe			transcription factor; zf-fungal binuclear cluster type (predicted)
Cons_CM-specific	orbh_4511	0	1	4	4	2	1	4	2	4	8	6	0.75	-	Agabi_varbisH97_2_223670	Armosto1_271006	Auramp1_266415	Copci_AmutBmut1_365344		Mk_00919700	PleosPC15_2_1106452	Ptegra1_567372	Schco3_2616096	IPR007219::Transcription factor domain; fungi::8	IPR036864::Zn(2)-C6 fungal-type D-binding domain superfamily::6	IPR001138::Zn(2)-C6 fungal-type D-binding domain::6	IPR017896::4Fe-4S ferredoxin-type; iron-sulphur binding domain::3							68						Fst4
Cons_CM-specific	orbh_5599	0	2	2	1	2	2	4	4	0	7	6	0.857143	-	Agabi_varbisH97_2_79223	Armosto1_271788	Auramp1_581519			Mk_01340300	PleosPC15_2_1014590	Ptegra1_309980	Schco3_2629777	IPR013087::Zinc finger C2H2-type::7	IPR036236::Zinc finger C2H2 superfamily::5
Cons_CM-specific	orbh_3694	0	1	4	4	1	1	4	2	4	8	5	0.625	-	Agabi_varbisH97_2_154135	Armosto1_269684	Auramp1_483724	Copci_AmutBmut1_463573		Mk_01231400	PleosPC15_2_1069066	Ptegra1_596612	Schco3_2629275	IPR007219::Transcription factor domain; fungi::8	IPR036864::Zn(2)-C6 fungal-type D-binding domain superfamily::4	IPR001138::Zn(2)-C6 fungal-type D-binding domain::4								101						Fst3
Cons_CM-specific	orbh_4843	0	1	4	4	1	1	4	2	4	8	5	0.625	-	Agabi_varbisH97_2_196103	Armosto1_262758	Auramp1_398433	Copci_AmutBmut1_367382		Mk_01335400	PleosPC15_2_1037146	Ptegra1_492746	Schco3_2611471	IPR013087::Zinc finger C2H2-type::8	IPR036236::Zinc finger C2H2 superfamily::6	IPR022755::Zinc finger; double-stranded R binding::6								211	AN2718_Aspnid NCU06919_Neucr	Uncharacterized ORF Has domains with predicted nucleic acid binding; zinc ion binding activity
Cons_CM-specific	orbh_7083	0	0	4	4	2	0	4	0	4	5	5	1	-		Armosto1_264593	Auramp1_403980	Copci_AmutBmut1_404567		Mk_00920600	PleosPC15_2_1088285			IPR036236::Zinc finger C2H2 superfamily::4	IPR013087::Zinc finger C2H2-type::4									65
Cons_CM-specific	orbh_5687	0	1	4	4	1	1	4	0	4	7	4	0.571429	-		Armosto1_258835	Auramp1_580555	Copci_AmutBmut1_501442		Mk_00169400	PleosPC15_2_1026763	Ptegra1_476012	Schco3_2557618	IPR013087::Zinc finger C2H2-type::7	IPR036236::Zinc finger C2H2 superfamily::7									27
Cons_CM-specific	orbh_6364	0	1	0	4	4	1	4	0	4	6	4	0.666667	-		Armosto1_268620	Auramp1_566958	Copci_AmutBmut1_359824		Mk_00817200		Ptegra1_657725	Schco3_2611694	IPR004827::Basic-leucine zipper domain::5										62
Cons_CM-specific	orbh_6606	0	0	0	4	0	1	4	4	4	5	4	0.8	-	Agabi_varbisH97_2_132586	Armosto1_258737		Copci_AmutBmut1_465631		Mk_00240400			Schco3_2520843	IPR004827::Basic-leucine zipper domain::5										51
Cons_CM-specific	orbh_1450	1	4	4	4	4	4	4	4	4	9	8	1	-	Agabi_varbisH97_2_192433	Armosto1_250476	Auramp1_474140	Copci_AmutBmut1_493627	Cryne_JEC21_1_5538	Mk_00696000	PleosPC15_2_1112690	Ptegra1_592151	Schco3_2632356	IPR001356::Homeobox domain::9	IPR009057::Homeobox-like domain superfamily::9	IPR017970::Homeobox; conserved site::9								55						Hom1
Cons_CM-specific	orbh_4008	0	2	4	4	4	4	4	4	4	8	8	1	-	Agabi_varbisH97_2_191073	Armosto1_257119	Auramp1_628874	Copci_AmutBmut1_495715		Mk_00309900	PleosPC15_2_1094476	Ptegra1_512632	Schco3_2626635	IPR018608::Gti1/Pac2 family::8										201	FGP1_fusarium AN6578_osaA_Aspnid	Verified ORF Protein with WOPR domain involved in regulation of sexual development				Tea1
Cons_CM-specific	orbh_3926	0	2	4	4	4	4	4	2	4	8	8	1	-	Agabi_varbisH97_2_189243	Armosto1_258830	Auramp1_564149	Copci_AmutBmut1_377260		Mk_00982900	PleosPC15_2_1089905	Ptegra1_498530	Schco3_2520583	IPR013087::Zinc finger C2H2-type::8	IPR036236::Zinc finger C2H2 superfamily::8									1
Cons_CM-specific	orbh_3895	0	4	4	4	2	2	4	2	4	8	8	1	-	Agabi_varbisH97_2_187697	Armosto1_253839	Auramp1_166128	Copci_AmutBmut1_491825		Mk_00568900	PleosPC15_2_1034000	Ptegra1_487954	Schco3_1213671	IPR007219::Transcription factor domain; fungi::7	IPR036864::Zn(2)-C6 fungal-type D-binding domain superfamily::5	IPR001138::Zn(2)-C6 fungal-type D-binding domain::5	IPR017896::4Fe-4S ferredoxin-type; iron-sulphur binding domain::3							10
Cons_CM-specific	orbh_4496	0	2	4	4	2	2	4	2	4	8	8	1	-	Agabi_varbisH97_2_222207	Armosto1_265728	Auramp1_475264	Copci_AmutBmut1_440363		Mk_01302000	PleosPC15_2_167727	Ptegra1_265764	Schco3_2635354	IPR000818::TEA/ATTS domain::8	IPR038096::TEA/ATTS domain superfamily::8									65
Cons_CM-specific	orbh_4637	0	2	2	2	2	2	2	4	4	8	8	1	-	Agabi_varbisH97_2_70614	Armosto1_259009	Auramp1_410050	Copci_AmutBmut1_327194		Mk_00875700	PleosPC15_2_1043224	Ptegra1_506312	Schco3_1088282	IPR000232::Heat shock factor (HSF)-type; D-binding::8	IPR027725::Heat shock transcription factor family::8	IPR036390::Winged helix D-binding domain superfamily::8	IPR036388::Winged helix-like D-binding domain superfamily::8							127
Cons_CM-specific	orbh_4651	0	2	2	2	2	4	4	2	2	8	8	1	-	Agabi_varbisH97_2_73014	Armosto1_270878	Auramp1_568626	Copci_AmutBmut1_530020		Mk_00923700	PleosPC15_2_1044583	Ptegra1_548546	Schco3_2533051	IPR001138::Zn(2)-C6 fungal-type D-binding domain::7	IPR036864::Zn(2)-C6 fungal-type D-binding domain superfamily::7									99
Cons_CM-specific	orbh_5525	0	2	4	0	4	4	4	4	4	7	7	1	-	Agabi_varbisH97_2_211033	Armosto1_252451	Auramp1_397439	Copci_AmutBmut1_443979			PleosPC15_2_1114418	Ptegra1_603428	Schco3_2642179	IPR010982::Lambda repressor-like; D-binding domain superfamily::7	IPR001387::Cro/C1-type helix-turn-helix domain::6									77
Cons_CM-specific	orbh_3425	1	1	4	4	4	4	4	4	2	9	7	0.875	-	Agabi_varbisH97_2_230069	Armosto1_260645	Auramp1_43054	Copci_AmutBmut1_482097	Cryne_JEC21_1_5953	Mk_00561600	PleosPC15_2_1102653	Ptegra1_506546	Schco3_1194000	IPR013087::Zinc finger C2H2-type::9	IPR036236::Zinc finger C2H2 superfamily::9									6						C2H2
Cons_CM-specific	orbh_3785	0	1	4	4	4	2	4	4	4	8	7	0.875	-	Agabi_varbisH97_2_181648	Armosto1_256023	Auramp1_270450	Copci_AmutBmut1_437393		Mk_00540700	PleosPC15_2_1086575	Ptegra1_594150	Schco3_2641534	IPR001138::Zn(2)-C6 fungal-type D-binding domain::8	IPR036864::Zn(2)-C6 fungal-type D-binding domain superfamily::8									3
Cons_CM-specific	orbh_4533	0	1	2	4	4	4	4	4	4	8	7	0.875	-	Agabi_varbisH97_2_226009	Armosto1_256305	Auramp1_407682	Copci_AmutBmut1_360688		Mk_00609900	PleosPC15_2_1094963	Ptegra1_651271	Schco3_2513195	IPR018608::Gti1/Pac2 family::8										79
Cons_CM-specific	orbh_4214	0	4	2	4	2	1	4	4	4	8	7	0.875	-	Agabi_varbisH97_2_195724	Armosto1_262431	Auramp1_424224	Copci_AmutBmut1_538904		Mk_00149900	PleosPC15_2_1112373	Ptegra1_580047	Schco3_2622228	IPR000679::Zinc finger; GATA-type::8	IPR013088::Zinc finger; NHR/GATA-type::8									78
Cons_CM-specific	orbh_5740	0	0	2	4	2	4	4	4	4	7	7	1	-	Agabi_varbisH97_2_151745	Armosto1_264700	Auramp1_238839	Copci_AmutBmut1_465487		Mk_00852500	PleosPC15_2_168906		Schco3_2292327	IPR027974::Domain of unknown function DUF4470::7	IPR002893::Zinc finger; MYND-type::3									28
Cons_CM-specific	orbh_4082	0	2	4	4	2	1	4	2	4	8	7	0.875	-	Agabi_varbisH97_2_192596	Armosto1_249966	Auramp1_392664	Copci_AmutBmut1_359157		Mk_00747500	PleosPC15_2_1064697	Ptegra1_506488	Schco3_2511242	IPR001138::Zn(2)-C6 fungal-type D-binding domain::8	IPR036864::Zn(2)-C6 fungal-type D-binding domain superfamily::8	IPR007219::Transcription factor domain; fungi::7								92
Cons_CM-specific	orbh_4277	0	2	4	1	2	2	2	4	4	8	7	0.875	-	Agabi_varbisH97_2_199557	Armosto1_257934	Auramp1_411789	Copci_AmutBmut1_492675		Mk_01225200	PleosPC15_2_60803	Ptegra1_616661	Schco3_2605931	IPR001138::Zn(2)-C6 fungal-type D-binding domain::8	IPR007219::Transcription factor domain; fungi::8	IPR036864::Zn(2)-C6 fungal-type D-binding domain superfamily::8								57	WAR1 in candida and saccharomyces		Zn(II)2Cys6 transcription factor; plays a role in resistance to weak organic acids; required for yeast cell adherence to silicone substrate; Spider biofilm induced		Homodimeric Zn2Cys6 zinc finger transcription factor; binds to a weak acid response element to induce transcription of PDR12 and FUN34; encoding an acid transporter and a putative ammonia transporter; respectively
Cons_CM-specific	orbh_4274	0	1	4	4	4	1	4	4	4	8	6	0.75	-	Agabi_varbisH97_2_199498	Armosto1_257967	Auramp1_633901	Copci_AmutBmut1_411205		Mk_01199500	PleosPC15_2_1080569	Ptegra1_652521	Schco3_2481568	IPR038096::TEA/ATTS domain superfamily::8	IPR000818::TEA/ATTS domain::8									57
Cons_CM-specific	orbh_4505	0	4	2	1	4	1	4	4	4	8	6	0.75	-	Agabi_varbisH97_2_223371	Armosto1_264750	Auramp1_398839	Copci_AmutBmut1_413307		Mk_00858300	PleosPC15_2_1043023	Ptegra1_506332	Schco3_2618635	IPR002893::Zinc finger; MYND-type::7										101
Cons_CM-specific	orbh_4552	0	2	4	4	2	1	4	1	4	8	6	0.75	-	Agabi_varbisH97_2_229063	Armosto1_262489	Auramp1_544947	Copci_AmutBmut1_368527		Mk_00177500	PleosPC15_2_1096662	Ptegra1_589386	Schco3_2666342	IPR000504::R recognition motif domain::8	IPR012677::Nucleotide-binding alpha-beta plait domain superfamily::8	IPR035979::R-binding domain superfamily::8								357	AN9090_rrmA_Aspnid NCU00768_Neucr SPBC23E6.01c_pombe YHR086W_M8_Sacce1	Verified ORF R binding protein involved in regulation of arginine catabolism controls stability of mRs in response to nitrogen sources and oxidative stress		splicing factor Cxr1	R binding protein; component of the U1 snRNP protein; mutants are defective in meiotic recombition and in formation of viable spores; involved in the formation of DSBs through meiosis-specific splicing of REC107 pre-mR; m8p regulon embraces the meiotic pre-mRs of REC107; HFM1; AMA1 SPO22 and PCH2; the putative R binding domains RRM2 and RRM3 are required for m8p meiotic function
Cons_CM-specific	orbh_4643	0	1	4	4	2	1	4	2	4	8	6	0.75	-	Agabi_varbisH97_2_71771	Armosto1_265457	Auramp1_513135	Copci_AmutBmut1_466739		Mk_00579600	PleosPC15_2_1105457	Ptegra1_246663	Schco3_2619790	IPR001841::Zinc finger; RING-type::6	IPR013083::Zinc finger; RING/FYVE/PHD-type::6	IPR017907::Zinc finger; RING-type; conserved site::6	IPR027370::RING-type zinc-finger; LisH dimerisation motif::2							45
Cons_CM-specific	orbh_1504	1	2	1	2	1	2	2	4	4	9	6	0.75	-	Agabi_varbisH97_2_192725	Armosto1_250543	Auramp1_563672	Copci_AmutBmut1_355613	Cryne_JEC21_1_838	Mk_00704600	PleosPC15_2_173849	Ptegra1_62903	Schco3_2634429	IPR017970::Homeobox; conserved site::9	IPR009057::Homeobox-like domain superfamily::9	IPR001356::Homeobox domain::9	IPR000047::Helix-turn-helix motif::2							49		rfeB				Hom2
Cons_CM-specific	orbh_6476	0	2	4	4	2	4	0	0	2	6	6	1	-			Auramp1_473559	Copci_AmutBmut1_22178		Mk_01350000	PleosPC15_2_29161	Ptegra1_557301	Schco3_2507178	IPR002893::Zinc finger; MYND-type::5
Cons_CM-specific	orbh_3744	0	1	4	4	1	1	4	4	4	8	5	0.625	-	Agabi_varbisH97_2_178849	Armosto1_266069	Auramp1_540943	Copci_AmutBmut1_367840		Mk_01360900	PleosPC15_2_1042508	Ptegra1_618621	Schco3_2495705	IPR001138::Zn(2)-C6 fungal-type D-binding domain::8	IPR036864::Zn(2)-C6 fungal-type D-binding domain superfamily::8	IPR007219::Transcription factor domain; fungi::2								64
Cons_CM-specific	orbh_6260	0	0	4	4	4	4	4	0	1	6	5	0.833333	-		Armosto1_253363	Auramp1_67981	Copci_AmutBmut1_128772		Mk_01341000	PleosPC15_2_1090547		Schco3_2614371	IPR036910::High mobility group box domain superfamily::5	IPR006780::YABBY protein::2									1
Cons_CM-specific	orbh_6944	0	0	4	0	4	4	4	0	4	5	5	1	-		Armosto1_252680	Auramp1_484049	Copci_AmutBmut1_365047			PleosPC15_2_1107808		Schco3_2668745	IPR009057::Homeobox-like domain superfamily::1										1
Cons_CM-specific	orbh_5943	0	4	4	1	1	2	4	0	4	7	5	0.714286	-		Armosto1_263052	Auramp1_410964	Copci_AmutBmut1_468224		Mk_01098600	PleosPC15_2_168663	Ptegra1_601365	Schco3_2598013	IPR036864::Zn(2)-C6 fungal-type D-binding domain superfamily::6	IPR001138::Zn(2)-C6 fungal-type D-binding domain::5									5
Cons_CM-specific	orbh_3518	0	1	4	4	1	1	4	4	2	8	5	0.625	-	Agabi_varbisH97_2_117313	Armosto1_261924	Auramp1_102394	Copci_AmutBmut1_467805		Mk_00103600	PleosPC15_2_39101	Ptegra1_560999	Schco3_2621320	IPR013083::Zinc finger; RING/FYVE/PHD-type::8	IPR015947::PUA-like superfamily::8	IPR001841::Zinc finger; RING-type::8	IPR003111::Lon; substrate-binding domain::8	IPR017907::Zinc finger; RING-type; conserved site::7						80
Cons_CM-specific	orbh_5927	0	1	4	4	1	2	4	0	4	7	5	0.714286	-		Armosto1_265630	Auramp1_535867	Copci_AmutBmut1_544274		Mk_01061300	PleosPC15_2_156360	Ptegra1_73828	Schco3_2572532	IPR002893::Zinc finger; MYND-type::1										2
Cons_CM-specific	orbh_5186	0	0	4	1	1	1	4	4	4	7	4	0.571429	-	Agabi_varbisH97_2_113594	Armosto1_258834	Auramp1_477655	Copci_AmutBmut1_441820		Mk_00649000	PleosPC15_2_1111862		Schco3_2644504	IPR007219::Transcription factor domain; fungi::7	IPR036864::Zn(2)-C6 fungal-type D-binding domain superfamily::6	IPR001138::Zn(2)-C6 fungal-type D-binding domain::6								70
Cons_CM-specific	orbh_6057	0	0	4	0	1	1	4	4	4	6	4	0.666667	-	Agabi_varbisH97_2_122941	Armosto1_251521	Auramp1_548633	Copci_AmutBmut1_498210			PleosPC15_2_1053338		Schco3_1039007	IPR036236::Zinc finger C2H2 superfamily::6	IPR013087::Zinc finger C2H2-type::6									1
Cons_CM-specific	orbh_5960	0	1	4	4	1	1	4	0	4	7	4	0.571429	-		Armosto1_262883	Auramp1_586365	Copci_AmutBmut1_428537		Mk_01413400	PleosPC15_2_1090134	Ptegra1_481670	Schco3_2571065	IPR001214::SET domain::7										10
Cons_CM-specific	orbh_630	1	2	2	1	2	4	4	2	2	9	7	0.875	-	Agabi_varbisH97_2_181288	Armosto1_262058	Auramp1_394853	Copci_AmutBmut1_421680	Cryne_JEC21_1_514	Mk_00107500	PleosPC15_2_1103521	Ptegra1_571761	Schco3_2576356											367	NCU16725_Neucr AN3155_yvc1_Aspnid YOR087W_YVC1_Sacce1 YVC1_candida	Uncharacterized ORF Transient receptor potential Ca2+ channel family protein			Vacuolar cation channel; mediates release of Ca(2+) from the vacuole in response to hyperosmotic shock
Cons_CM-specific	orbh_4438	1	2	2	0	2	2	2	4	2	8	7	1	-	Agabi_varbisH97_2_213473	Armosto1_262857	Auramp1_501501	Copci_AmutBmut1_168570	Cryne_JEC21_1_2065		PleosPC15_2_1082467	Ptegra1_526665	Schco3_2613255	IPR005829::Sugar transporter; conserved site::8	IPR005828::Major facilitator; sugar transporter-like::8	IPR036259::MFS transporter superfamily::8	IPR003663::Sugar/inositol transporter::8	IPR020846::Major facilitator superfamily domain::8						121	YHR096C_HXT5_Sacce1				Hexose transporter with moderate affinity for glucose; induced in the presence of non-fermentable carbon sources; induced by a decrease in growth rate; contains an extended N-termil domain relative to other HXTs; HXT5 has a paralog; HXT3; that arose from the whole genome duplication
Cons_CM-specific	orbh_3866	0	2	2	4	2	4	1	4	4	8	7	0.875	-	Agabi_varbisH97_2_185708	Armosto1_265454	Auramp1_511127	Copci_AmutBmut1_111086		Mk_01091500	PleosPC15_2_1113115	Ptegra1_605403	Schco3_2672577	IPR011701::Major facilitator superfamily::8	IPR036259::MFS transporter superfamily::8	IPR020846::Major facilitator superfamily domain::3								183	SPAC1039.04_pombe AN3221_Aspnid NCU08715_Neucr	Uncharacterized ORF Has domains with predicted role in transmembrane transport and integral component of membrane localization		carboxylic acid transmembrane transporter (predicted)
Cons_CM-specific	orbh_3500	0	1	4	4	2	1	4	4	4	8	6	0.75	-	Agabi_varbisH97_2_115924	Armosto1_266138	Auramp1_477331	Copci_AmutBmut1_437935		Mk_00510800	PleosPC15_2_52788	Ptegra1_511441	Schco3_2633216	IPR036259::MFS transporter superfamily::8	IPR020846::Major facilitator superfamily domain::8	IPR011701::Major facilitator superfamily::4	IPR005828::Major facilitator; sugar transporter-like::4							359	SPAPB1E7.08c_pombe AN11167_Aspnid NCU01285_Neucr	Uncharacterized ORF Has domains with predicted transmembrane transporter activity; role in transmembrane transport and integral component of membrane localization		transmembrane transporter (predicted)
Cons_CM-specific	orbh_5019	0	1	4	2	1	2	4	4	4	8	6	0.75	-	Agabi_varbisH97_2_223428	Armosto1_263983	Auramp1_540602	Copci_AmutBmut1_371400		Mk_01359700	PleosPC15_2_1079646	Ptegra1_564442	Schco3_2642018	IPR011701::Major facilitator superfamily::8	IPR020846::Major facilitator superfamily domain::8	IPR036259::MFS transporter superfamily::8								136	AN2344_Aspnid SPAC1002.16c_pombe NCU06159_Neucr	Uncharacterized ORF Has domains with predicted role in transmembrane transport and integral component of membrane localization		carboxylic acid transmembrane transporter (predicted)
Cons_CM-specific	orbh_5994	0	2	4	4	2	1	4	0	4	7	6	0.857143	-		Armosto1_259347	Auramp1_568584	Copci_AmutBmut1_225784		Mk_01135500	PleosPC15_2_1067740	Ptegra1_562420	Schco3_1138139	IPR004813::Oligopeptide transporter; OPT superfamily::7										264	AN6452_Aspnid NCU04991_Neucr	Uncharacterized ORF Orthologs have oligopeptide transmembrane transporter activity and role in transmembrane transport
Cons_CM-specific	orbh_66176	0	0	4	4	2	2	4	4	0	6	6	1	-	Agabi_varbisH97_2_183903	Armosto1_257633	Auramp1_567873			Mk_00363700	PleosPC15_2_1090394		Schco3_2283957	IPR005829::Sugar transporter; conserved site::6	IPR036259::MFS transporter superfamily::6	IPR004738::Phosphate permease::6	IPR005828::Major facilitator; sugar transporter-like::6	IPR020846::Major facilitator superfamily domain::6
Cons_CM-specific	orbh_3345	1	2	4	4	2	1	4	1	4	9	6	0.75	-	Agabi_varbisH97_2_188285	Armosto1_252573	Auramp1_533605	Copci_AmutBmut1_176106	Cryne_JEC21_1_3788	Mk_01370200	PleosPC15_2_41657	Ptegra1_520891	Schco3_2358954	IPR036259::MFS transporter superfamily::9	IPR000109::Proton-dependent oligopeptide transporter family::9	IPR018456::PTR2 family proton/oligopeptide symporter; conserved site::5								224	ptr2_pombe YKR093W_PTR2_Sacce1			plasma membrane PTR family peptide transmembrane transporter Ptr2	Integral membrane peptide transporter; mediates transport of di- and tri-peptides; conserved protein that contains 12 transmembrane domains; PTR2 expression is regulated by the N-end rule pathway via repression by Cup9p
Cons_CM-specific	orbh_5071	0	1	4	4	2	1	2	4	4	8	6	0.75	-	Agabi_varbisH97_2_79957	Armosto1_257272	Auramp1_633906	Copci_AmutBmut1_476668		Mk_01115800	PleosPC15_2_33590	Ptegra1_592940	Schco3_2607666	IPR011701::Major facilitator superfamily::8	IPR020846::Major facilitator superfamily domain::8	IPR036259::MFS transporter superfamily::8	IPR001958::Tetracycline resistance protein TetA/multidrug resistance protein MdtG::4							71	NCU02522_Neucr
Cons_CM-specific	orbh_5121	0	1	2	4	4	4	2	4	1	8	6	0.75	-	Agabi_varbisH97_2_204922	Armosto1_260020	Auramp1_5930	Copci_AmutBmut1_426010		Mk_01424100	PleosPC15_2_61618	Ptegra1_587669	Schco3_2508421	IPR020846::Major facilitator superfamily domain::8	IPR011701::Major facilitator superfamily::8	IPR036259::MFS transporter superfamily::8								27
Cons_CM-specific	orbh_5518	0	0	2	4	2	4	4	1	4	7	6	0.857143	-	Agabi_varbisH97_2_209521	Armosto1_253453	Auramp1_396661	Copci_AmutBmut1_447262		Mk_00991900	PleosPC15_2_48595		Schco3_1190175	IPR002293::Amino acid/polyamine transporter I::7										104
Cons_CM-specific	orbh_6340	0	2	4	4	2	2	4	0	0	6	6	1	-		Armosto1_265245	Auramp1_179978			Mk_00863000	PleosPC15_2_1105315	Ptegra1_655748	Schco3_2537163	IPR002528::Multi antimicrobial extrusion protein::6
Cons_CM-specific	orbh_5637	0	1	4	4	1	4	4	0	4	7	5	0.714286	-		Armosto1_253123	Auramp1_582646	Copci_AmutBmut1_374240		Mk_00364400	PleosPC15_2_1107392	Ptegra1_590920	Schco3_2625385	IPR004837::Sodium/calcium exchanger membrane region::7										76
Cons_CM-specific	orbh_5275	0	1	4	0	4	1	4	4	4	7	5	0.714286	-	Agabi_varbisH97_2_152560	Armosto1_254742	Auramp1_564378	Copci_AmutBmut1_420930			PleosPC15_2_48881	Ptegra1_124486	Schco3_2620830	IPR011701::Major facilitator superfamily::7	IPR020846::Major facilitator superfamily domain::7	IPR036259::MFS transporter superfamily::7								340	NCU05580_Neucr SPCC1529.01_pombe AN11120_Aspnid	Uncharacterized ORF Has domains with predicted role in transmembrane transport and integral component of membrane localization		transmembrane transporter (predicted)
Cons_CM-specific	orbh_4979	0	1	4	1	2	4	4	1	4	8	5	0.625	-	Agabi_varbisH97_2_198526	Armosto1_251380	Auramp1_407720	Copci_AmutBmut1_463045		Mk_00990600	PleosPC15_2_21891	Ptegra1_516187	Schco3_2487304	IPR036259::MFS transporter superfamily::8	IPR011701::Major facilitator superfamily::6	IPR020846::Major facilitator superfamily domain::2								51
Cons_CM-specific	orbh_6264	0	0	4	2	4	1	4	4	0	6	5	0.833333	-	Agabi_varbisH97_2_121229	Armosto1_253683	Auramp1_484085			Mk_00255400	PleosPC15_2_153566		Schco3_1154281	IPR011701::Major facilitator superfamily::6	IPR036259::MFS transporter superfamily::6	IPR020846::Major facilitator superfamily domain::6
Cons_CM-specific	orbh_5455	0	2	4	4	1	1	0	4	4	7	5	0.714286	-	Agabi_varbisH97_2_195900		Auramp1_548024	Copci_AmutBmut1_464027		Mk_01351400	PleosPC15_2_1093149	Ptegra1_373674	Schco3_2640951	IPR036259::MFS transporter superfamily::7	IPR000109::Proton-dependent oligopeptide transporter family::7	IPR018456::PTR2 family proton/oligopeptide symporter; conserved site::5								223	NCU05079_Neucr AN8903_Aspnid	Uncharacterized ORF Putative peptide transporter transcript upregulated by nitrate limitation
Cons_CM-specific	orbh_66302	0	2	4	4	1	1	4	0	4	7	5	0.714286	-		Armosto1_254775	Auramp1_538605	Copci_AmutBmut1_538158		Mk_00119900	PleosPC15_2_1079637	Ptegra1_47974	Schco3_2636140	IPR001905::Ammonium transporter::7	IPR018047::Ammonium transporter; conserved site::7	IPR024041::Ammonium transporter AmtB-like domain::7	IPR029020::Ammonium/urea transporter::7	IPR002229::Blood group Rhesus C/E/D polypeptide::3						399	NCU01065_Neucr amt1_pombe AN1181_mepA_Aspnid	Verified ORF Putative transporter with a predicted role in small molecule transport ammonium permease		plasma membrane ammonium transmembrane transporter Amt1
Cons_CM-specific	orbh_5454	0	1	4	4	1	1	4	4	0	7	4	0.571429	-	Agabi_varbisH97_2_195899	Armosto1_265246	Auramp1_633831			Mk_00861800	PleosPC15_2_1044213	Ptegra1_592722	Schco3_2620257	IPR002293::Amino acid/polyamine transporter I::7
Cons_CM-specific	orbh_66096	0	0	4	4	0	0	4	4	1	5	4	0.8	-	Agabi_varbisH97_2_80111	Armosto1_266294		Copci_AmutBmut1_378233		Mk_01323900	PleosPC15_2_1094209			IPR036259::MFS transporter superfamily::5	IPR011701::Major facilitator superfamily::5	IPR020846::Major facilitator superfamily domain::5								166	AN2746_Aspnid	Uncharacterized ORF Has domains with predicted role in transmembrane transport and integral component of membrane localization
Cons_CM-specific	orbh_6391	0	1	4	0	4	2	4	0	4	6	5	0.833333	-		Armosto1_272253	Auramp1_545745	Copci_AmutBmut1_463015			PleosPC15_2_1095022	Ptegra1_573096	Schco3_68300	IPR005828::Major facilitator; sugar transporter-like::6	IPR003663::Sugar/inositol transporter::6	IPR036259::MFS transporter superfamily::6	IPR005829::Sugar transporter; conserved site::6	IPR020846::Major facilitator superfamily domain::6						337	NCU05627_Neucr ght2_pombe YDR342C_HXT7_Sacce1			plasma membrane glucose/fructose:proton symporter Ght2	High-affinity glucose transporter; member of the major facilitator superfamily; nearly identical to Hxt6p; expressed at high basal levels relative to other HXTs; expression repressed by high glucose levels; HXT7 has a paralog; HXT4; that arose from the whole genome duplication
Cons_CM-specific	orbh_3885	0	1	4	4	2	1	4	4	4	8	6	0.75	-	Agabi_varbisH97_2_187070	Armosto1_251702	Auramp1_539805	Copci_AmutBmut1_365182		Mk_01150600	PleosPC15_2_1061842	Ptegra1_563534	Schco3_2573586	IPR004813::Oligopeptide transporter; OPT superfamily::8										53
Cons_CM-specific	orbh_1545	1	2	4	4	4	4	2	4	4	9	8	1	-	Agabi_varbisH97_2_193226	Armosto1_265230	Auramp1_489008	Copci_AmutBmut1_397645	Cryne_JEC21_1_2038	Mk_00415800	PleosPC15_2_1089962	Ptegra1_547501	Schco3_2619010	IPR036259::MFS transporter superfamily::9	IPR005829::Sugar transporter; conserved site::9	IPR003663::Sugar/inositol transporter::9	IPR005828::Major facilitator; sugar transporter-like::9	IPR020846::Major facilitator superfamily domain::9						371	YDL138W_RGT2_Sacce1 AN1797_Aspnid NCU04963_Neucr	Uncharacterized ORF Orthologs have fructose transmembrane transporter activity; glucose transmembrane transporter activity; mannose transmembrane transporter activity			Plasma membrane high glucose sensor that regulates glucose transport; contains 12 predicted transmembrane segments and a long C-termil tail required for induction of hexose transporters; RGT2 has a paralog; SNF3; that arose from the whole genome duplication
Cons_CM-specific	orbh_5645	0	2	4	4	4	2	2	0	4	7	7	1	-		Armosto1_253689	Auramp1_17779	Copci_AmutBmut1_453986		Mk_01135200	PleosPC15_2_1104248	Ptegra1_558152	Schco3_2601704	IPR008922::Uncharacterised domain; di-copper centre::7	IPR002227::Tyrosise copper-binding domain::7									1
Cons_CM-specific	orbh_4792	0	2	4	4	4	4	4	2	4	8	8	1	-	Agabi_varbisH97_2_114985	Armosto1_258159	Auramp1_497961	Copci_AmutBmut1_440772		Mk_01219300	PleosPC15_2_1099452	Ptegra1_558041	Schco3_2561070	IPR042123::Zip3/RNF212-like::7	IPR001841::Zinc finger; RING-type::5									17
Cons_CM-specific	orbh_3775	0	4	2	2	2	2	2	2	4	8	8	1	-	Agabi_varbisH97_2_180911	Armosto1_252452	Auramp1_173909	Copci_AmutBmut1_455937		Mk_00503700	PleosPC15_2_1049356	Ptegra1_594062	Schco3_2517390	IPR001841::Zinc finger; RING-type::7	IPR013083::Zinc finger; RING/FYVE/PHD-type::7									62
Cons_CM-specific	orbh_5724	0	2	4	4	4	4	4	0	4	7	7	1	-		Armosto1_262100	Auramp1_116003	Copci_AmutBmut1_378120		Mk_00257800	PleosPC15_2_1063819	Ptegra1_560581	Schco3_2700763	IPR042448::E3 ubiquitin-protein ligase CCNB1IP1::6	IPR013083::Zinc finger; RING/FYVE/PHD-type::4	IPR001841::Zinc finger; RING-type::4	IPR017907::Zinc finger; RING-type; conserved site::4							137
Cons_CM-specific	orbh_5551	0	2	4	0	4	4	4	2	4	7	7	1	-	Agabi_varbisH97_2_225554	Armosto1_256249	Auramp1_549656	Copci_AmutBmut1_543850			PleosPC15_2_177252	Ptegra1_93283	Schco3_1334259	IPR012677::Nucleotide-binding alpha-beta plait domain superfamily::7	IPR017907::Zinc finger; RING-type; conserved site::6	IPR001841::Zinc finger; RING-type::6	IPR035979::R-binding domain superfamily::6	IPR013083::Zinc finger; RING/FYVE/PHD-type::4						82
Cons_CM-specific	orbh_5161	0	4	4	4	4	4	4	4	4	8	8	1	-	Agabi_varbisH97_2_61282	Armosto1_268570	Auramp1_197703	Copci_AmutBmut1_416584		Mk_00825800	PleosPC15_2_166158	Ptegra1_559539	Schco3_1082776											69
Cons_CM-specific	orbh_3782	0	2	4	4	4	4	4	4	4	8	8	1	-	Agabi_varbisH97_2_181523	Armosto1_252428	Auramp1_580435	Copci_AmutBmut1_541993		Mk_01215500	PleosPC15_2_158698	Ptegra1_603355	Schco3_2584841											64
Cons_CM-specific	orbh_3937	0	2	4	4	4	4	4	4	4	8	8	1	-	Agabi_varbisH97_2_189424	Armosto1_269014	Auramp1_566684	Copci_AmutBmut1_493979		Mk_01282500	PleosPC15_2_1054227	Ptegra1_564433	Schco3_2528990											87
Cons_CM-specific	orbh_4478	0	2	4	4	4	4	4	4	4	8	8	1	-	Agabi_varbisH97_2_219810	Armosto1_261536	Auramp1_565306	Copci_AmutBmut1_499106		Mk_00057400	PleosPC15_2_1112345	Ptegra1_573272	Schco3_2499948											64
Cons_CM-specific	orbh_4847	0	2	4	4	4	4	4	4	4	8	8	1	-	Agabi_varbisH97_2_180981	Armosto1_263437	Auramp1_175202	Copci_AmutBmut1_327032		Mk_01176900	PleosPC15_2_171206	Ptegra1_652074	Schco3_2122040											33
Cons_CM-specific	orbh_3573	0	2	4	4	2	4	4	4	4	8	8	1	-	Agabi_varbisH97_2_121930	Armosto1_252566	Auramp1_174441	Copci_AmutBmut1_400357		Mk_00512600	PleosPC15_2_1090796	Ptegra1_601817	Schco3_2642311											63
Cons_CM-specific	orbh_3632	0	2	2	4	4	4	4	4	4	8	8	1	-	Agabi_varbisH97_2_136509	Armosto1_265488	Auramp1_520872	Copci_AmutBmut1_482401		Mk_00930800	PleosPC15_2_1034972	Ptegra1_572420	Schco3_2624785											7
Cons_CM-specific	orbh_4385	0	4	4	4	2	2	4	2	4	8	8	1	-	Agabi_varbisH97_2_209348	Armosto1_256596	Auramp1_627557	Copci_AmutBmut1_373783		Mk_01399500	PleosPC15_2_1051773	Ptegra1_497744	Schco3_2627981											91
Cons_CM-specific	orbh_4429	0	4	4	4	2	4	2	2	4	8	8	1	-	Agabi_varbisH97_2_212410	Armosto1_269907	Auramp1_483536	Copci_AmutBmut1_433477		Mk_00169100	PleosPC15_2_1055831	Ptegra1_573729	Schco3_2629581	IPR027842::Protein of unknown function DUF4449::8										93
Cons_CM-specific	orbh_3577	0	2	2	2	4	4	4	4	2	8	8	1	-	Agabi_varbisH97_2_122159	Armosto1_252377	Auramp1_571347	Copci_AmutBmut1_438795		Mk_00509300	PleosPC15_2_1090862	Ptegra1_585226	Schco3_1193901											52
Cons_CM-specific	orbh_3779	0	2	4	2	4	2	4	4	2	8	8	1	-	Agabi_varbisH97_2_181251	Armosto1_262371	Auramp1_545184	Copci_AmutBmut1_462299		Mk_00123800	PleosPC15_2_1076403	Ptegra1_234178	Schco3_2622454											89
Cons_CM-specific	orbh_4677	0	2	4	4	2	2	4	2	4	8	8	1	-	Agabi_varbisH97_2_78468	Armosto1_250613	Auramp1_555866	Copci_AmutBmut1_502657		Mk_01177800	PleosPC15_2_1039455	Ptegra1_558974	Schco3_2675287											60
Cons_CM-specific	orbh_4877	0	2	4	4	2	2	4	4	2	8	8	1	-	Agabi_varbisH97_2_178788	Armosto1_265466	Auramp1_550870	Copci_AmutBmut1_392307		Mk_00892800	PleosPC15_2_1105442	Ptegra1_604162	Schco3_1031472	IPR037647::HIRA-interacting protein 3::8										10
Cons_CM-specific	orbh_4664	0	2	4	4	2	2	2	2	4	8	8	1	-	Agabi_varbisH97_2_75362	Armosto1_253848	Auramp1_484738	Copci_AmutBmut1_502838		Mk_00232800	PleosPC15_2_1098974	Ptegra1_563142	Schco3_2505178											104
Cons_CM-specific	orbh_4679	0	2	2	4	2	4	2	2	4	8	8	1	-	Agabi_varbisH97_2_78494	Armosto1_262510	Auramp1_478898	Copci_AmutBmut1_419716		Mk_00142500	PleosPC15_2_1112326	Ptegra1_577161	Schco3_2621121											91						Spc14
Cons_CM-specific	orbh_5176	0	2	2	2	4	2	2	4	4	8	8	1	-	Agabi_varbisH97_2_138881	Armosto1_252823	Auramp1_410367	Copci_AmutBmut1_464432		Mk_00539700	PleosPC15_2_1114325	Ptegra1_607057	Schco3_2518392											61
Cons_CM-specific	orbh_4170	0	2	2	2	4	2	2	2	4	8	8	1	-	Agabi_varbisH97_2_194819	Armosto1_254121	Auramp1_539754	Copci_AmutBmut1_463310		Mk_00169000	PleosPC15_2_20238	Ptegra1_613427	Schco3_2635876											85
Cons_CM-specific	orbh_4200	0	2	2	2	2	2	4	2	4	8	8	1	-	Agabi_varbisH97_2_195458	Armosto1_263464	Auramp1_572457	Copci_AmutBmut1_443410		Mk_00500700	PleosPC15_2_1109082	Ptegra1_204590	Schco3_2643624											66
Cons_CM-specific	orbh_2302	1	2	2	2	2	2	2	2	2	9	8	1	-	Agabi_varbisH97_2_209685	Armosto1_254080	Auramp1_484251	Copci_AmutBmut1_446070	Cryne_JEC21_1_2323	Mk_00247900	PleosPC15_2_1094746	Ptegra1_599382	Schco3_2580854	IPR000802::Arsenical pump membrane protein; ArsB::7										266
Cons_CM-specific	orbh_5048	0	2	2	2	2	2	2	2	2	8	8	1	-	Agabi_varbisH97_2_225428	Armosto1_265066	Auramp1_508736	Copci_AmutBmut1_409417		Mk_00411000	PleosPC15_2_1088079	Ptegra1_516924	Schco3_2608261	IPR036910::High mobility group box domain superfamily::8	IPR009071::High mobility group box domain::8									35
Cons_CM-specific	orbh_4201	0	2	4	4	2	1	4	4	4	8	7	0.875	-	Agabi_varbisH97_2_195461	Armosto1_252306	Auramp1_508845	Copci_AmutBmut1_514684		Mk_00513100	PleosPC15_2_1109081	Ptegra1_512926	Schco3_2608104											24
Cons_CM-specific	orbh_3834	0	2	4	2	2	2	1	2	4	8	7	0.875	-	Agabi_varbisH97_2_184224	Armosto1_253092	Auramp1_405027	Copci_AmutBmut1_230956		Mk_00345500	PleosPC15_2_1067532	Ptegra1_502736	Schco3_2482872	IPR043129::ATPase; nucleotide binding domain::8										87
Cons_CM-specific	orbh_3484	0	4	4	4	4	4	4	1	4	8	7	0.875	-	Agabi_varbisH97_2_115076	Armosto1_258181	Auramp1_514422	Copci_AmutBmut1_461720		Mk_01223900	PleosPC15_2_152839	Ptegra1_557909	Schco3_2560451											61
Cons_CM-specific	orbh_3740	0	1	4	4	4	4	4	4	4	8	7	0.875	-	Agabi_varbisH97_2_178575	Armosto1_267254	Auramp1_515935	Copci_AmutBmut1_482223		Mk_01081900	PleosPC15_2_1031682	Ptegra1_521153	Schco3_2000796											56
Cons_CM-specific	orbh_4075	0	1	4	4	4	4	4	4	4	8	7	0.875	-	Agabi_varbisH97_2_192500	Armosto1_250747	Auramp1_553815	Copci_AmutBmut1_529552		Mk_00666000	PleosPC15_2_1089545	Ptegra1_562866	Schco3_2631869											153
Cons_CM-specific	orbh_5227	0	0	4	4	4	4	4	4	4	7	7	1	-	Agabi_varbisH97_2_120086	Armosto1_251510	Auramp1_59991	Copci_AmutBmut1_457022		Mk_00452600	PleosPC15_2_1100613		Schco3_1192190											3
Cons_CM-specific	orbh_5294	0	0	4	4	4	4	4	4	4	7	7	1	-	Agabi_varbisH97_2_178679	Armosto1_255467	Auramp1_180211	Copci_AmutBmut1_478792		Mk_00875000	PleosPC15_2_1089744		Schco3_2620286											28
Cons_CM-specific	orbh_5476	0	4	4	4	4	4	0	4	4	7	7	1	-	Agabi_varbisH97_2_200902		Auramp1_494496	Copci_AmutBmut1_362513		Mk_00020400	PleosPC15_2_1090510	Ptegra1_569746	Schco3_2620233											80
Cons_CM-specific	orbh_5560	0	4	4	4	0	4	4	4	4	7	7	1	-	Agabi_varbisH97_2_228532	Armosto1_269714		Copci_AmutBmut1_50839		Mk_00178500	PleosPC15_2_1091079	Ptegra1_482990	Schco3_2623582											56
Cons_CM-specific	orbh_5583	0	0	4	4	4	4	4	4	4	7	7	1	-	Agabi_varbisH97_2_68004	Armosto1_256230	Auramp1_548044	Copci_AmutBmut1_480561		Mk_00203400	PleosPC15_2_1090472		Schco3_2641044	IPR036855::Zinc finger; CCCH-type superfamily::1	IPR000571::Zinc finger; CCCH-type::1									51
Cons_CM-specific	orbh_5193	0	4	4	0	2	4	4	4	4	7	7	1	-	Agabi_varbisH97_2_114154	Armosto1_268569	Auramp1_566782	Copci_AmutBmut1_539462			PleosPC15_2_1101732	Ptegra1_153614	Schco3_2468104											25
Cons_CM-specific	orbh_5204	0	2	4	0	4	4	4	4	4	7	7	1	-	Agabi_varbisH97_2_115528	Armosto1_257819	Auramp1_570547	Copci_AmutBmut1_181843			PleosPC15_2_1087695	Ptegra1_21026	Schco3_2606301											44
Cons_CM-specific	orbh_5905	0	4	4	0	2	4	4	4	4	7	7	1	-	Agabi_varbisH97_2_178286	Armosto1_250795	Auramp1_396342	Copci_AmutBmut1_452121			PleosPC15_2_1093456	Ptegra1_502146	Schco3_2628053											36
Cons_CM-specific	orbh_3645	0	4	4	4	1	2	4	4	4	8	7	0.875	-	Agabi_varbisH97_2_138650	Armosto1_249933	Auramp1_515025	Copci_AmutBmut1_376045		Mk_00772700	PleosPC15_2_1048382	Ptegra1_127502	Schco3_2512531											79
Cons_CM-specific	orbh_4031	0	4	4	4	1	2	4	4	4	8	7	0.875	-	Agabi_varbisH97_2_191525	Armosto1_253245	Auramp1_400913	Copci_AmutBmut1_229168		Mk_00687500	PleosPC15_2_1113709	Ptegra1_602537	Schco3_2642738											41
Cons_CM-specific	orbh_4056	0	4	4	4	1	2	4	4	4	8	7	0.875	-	Agabi_varbisH97_2_191931	Armosto1_261580	Auramp1_545436	Copci_AmutBmut1_212774		Mk_00074100	PleosPC15_2_1063956	Ptegra1_549867	Schco3_2615398											92
Cons_CM-specific	orbh_4140	0	1	4	4	2	4	4	4	4	8	7	0.875	-	Agabi_varbisH97_2_194109	Armosto1_251522	Auramp1_404195	Copci_AmutBmut1_368953		Mk_00456500	PleosPC15_2_1062161	Ptegra1_525028	Schco3_2636549											105
Cons_CM-specific	orbh_4372	0	4	4	4	1	2	4	4	4	8	7	0.875	-	Agabi_varbisH97_2_208371	Armosto1_251740	Auramp1_409998	Copci_AmutBmut1_412248		Mk_01090600	PleosPC15_2_1061874	Ptegra1_548322	Schco3_2620155	IPR015009::Vinculin-binding site-containing domain::1										96
Cons_CM-specific	orbh_4614	0	1	4	2	4	4	4	4	4	8	7	0.875	-	Agabi_varbisH97_2_67334	Armosto1_261671	Auramp1_565214	Copci_AmutBmut1_359587		Mk_00072900	PleosPC15_2_1038859	Ptegra1_550413	Schco3_1080613											61
Cons_CM-specific	orbh_5036	0	4	4	4	2	4	4	1	4	8	7	0.875	-	Agabi_varbisH97_2_188792	Armosto1_260277	Auramp1_483216	Copci_AmutBmut1_248435		Mk_00501000	PleosPC15_2_1089917	Ptegra1_574956	Schco3_1057329											88
Cons_CM-specific	orbh_5604	0	4	2	4	4	4	4	0	4	7	7	1	-		Armosto1_250165	Auramp1_476644	Copci_AmutBmut1_539116		Mk_00721100	PleosPC15_2_1030808	Ptegra1_565373	Schco3_2361211											124	NCU10129_Neucr
Cons_CM-specific	orbh_5606	0	4	4	4	2	4	4	0	4	7	7	1	-		Armosto1_250279	Auramp1_563444	Copci_AmutBmut1_501073		Mk_01404600	PleosPC15_2_1096966	Ptegra1_591251	Schco3_2511048											67
Cons_CM-specific	orbh_5719	0	2	4	4	4	4	4	0	4	7	7	1	-		Armosto1_261954	Auramp1_564455	Copci_AmutBmut1_156206		Mk_00104200	PleosPC15_2_1103449	Ptegra1_593793	Schco3_2538036											2
Cons_CM-specific	orbh_5753	0	2	4	4	4	4	4	0	4	7	7	1	-		Armosto1_265261	Auramp1_489164	Copci_AmutBmut1_397497		Mk_01079000	PleosPC15_2_174079	Ptegra1_293287	Schco3_2686764											1
Cons_CM-specific	orbh_5809	0	4	4	4	2	4	4	0	4	7	7	1	-		Armosto1_271193	Auramp1_493026	Copci_AmutBmut1_495992		Mk_00931500	PleosPC15_2_1093998	Ptegra1_588247	Schco3_2616754											56
Cons_CM-specific	orbh_5874	0	2	4	4	4	4	4	0	4	7	7	1	-		Armosto1_257148	Auramp1_567546	Copci_AmutBmut1_114685		Mk_01273600	PleosPC15_2_1113942	Ptegra1_169527	Schco3_2502508											4
Cons_CM-specific	orbh_4398	0	4	4	1	2	2	4	4	4	8	7	0.875	-	Agabi_varbisH97_2_210144	Armosto1_259612	Auramp1_533113	Copci_AmutBmut1_501294		Mk_00892500	PleosPC15_2_1108185	Ptegra1_526346	Schco3_2632338											97
Cons_CM-specific	orbh_4571	0	2	4	1	4	2	4	4	4	8	7	0.875	-	Agabi_varbisH97_2_60873	Armosto1_258847	Auramp1_477996	Copci_AmutBmut1_441832		Mk_01500400	PleosPC15_2_156213	Ptegra1_158509	Schco3_2520747											2
Cons_CM-specific	orbh_4607	0	2	4	4	4	1	2	4	4	8	7	0.875	-	Agabi_varbisH97_2_66202	Armosto1_253362	Auramp1_574699	Copci_AmutBmut1_433064		Mk_00612000	PleosPC15_2_1062047	Ptegra1_365694	Schco3_2624887											107
Cons_CM-specific	orbh_5212	0	2	4	0	4	4	4	2	4	7	7	1	-	Agabi_varbisH97_2_116864	Armosto1_261517	Auramp1_481412	Copci_AmutBmut1_494717			PleosPC15_2_1112091	Ptegra1_647849	Schco3_2700661											1
Cons_CM-specific	orbh_5277	0	0	4	4	2	2	4	4	4	7	7	1	-	Agabi_varbisH97_2_175668	Armosto1_270284	Auramp1_566891	Copci_AmutBmut1_497622		Mk_00904800	PleosPC15_2_156116		Schco3_2611466											4
Cons_CM-specific	orbh_5355	0	2	0	4	4	4	4	2	4	7	7	1	-	Agabi_varbisH97_2_189622	Armosto1_268626	Auramp1_566945	Copci_AmutBmut1_464169		Mk_00817800		Ptegra1_540916	Schco3_2486494											55
Cons_CM-specific	orbh_5615	0	2	4	4	4	4	4	0	2	7	7	1	-		Armosto1_250463	Auramp1_624845	Copci_AmutBmut1_537984		Mk_01033000	PleosPC15_2_166010	Ptegra1_593341	Schco3_2690501											49
Cons_CM-specific	orbh_3536	0	2	4	2	4	4	1	4	4	8	7	0.875	-	Agabi_varbisH97_2_118673	Armosto1_265256	Auramp1_219806	Copci_AmutBmut1_249370		Mk_01078700	PleosPC15_2_1088111	Ptegra1_566475	Schco3_2619051											60
Cons_CM-specific	orbh_5703	0	2	4	2	4	4	4	0	4	7	7	1	-		Armosto1_261451	Auramp1_117835	Copci_AmutBmut1_16417		Mk_00055800	PleosPC15_2_1076060	Ptegra1_107524	Schco3_2624508											88
Cons_CM-specific	orbh_3999	0	1	4	2	2	4	4	2	4	8	7	0.875	-	Agabi_varbisH97_2_190839	Armosto1_267030	Auramp1_436491	Copci_AmutBmut1_167510		Mk_01052300	PleosPC15_2_1110785	Ptegra1_496125	Schco3_2660951											79
Cons_CM-specific	orbh_4836	0	2	4	2	1	4	4	2	4	8	7	0.875	-	Agabi_varbisH97_2_139979	Armosto1_262240	Auramp1_424820	Copci_AmutBmut1_445595		Mk_01208400	PleosPC15_2_156245	Ptegra1_485611	Schco3_2498402	IPR006598::Glycosyl transferase CAP10 domain::1										26
Cons_CM-specific	orbh_5245	0	2	4	0	4	2	2	2	4	7	7	1	-	Agabi_varbisH97_2_123026	Armosto1_269957	Auramp1_497479	Copci_AmutBmut1_359614			PleosPC15_2_1109792	Ptegra1_640680	Schco3_2605172	IPR028012::Protein of unknown function DUF4451::7										2
Cons_CM-specific	orbh_5608	0	2	4	0	2	2	2	2	4	7	7	1	-	Agabi_varbisH97_2_117878	Armosto1_250290	Auramp1_625059	Copci_AmutBmut1_538260			PleosPC15_2_1104575	Ptegra1_562966	Schco3_2550205											44
Cons_CM-specific	orbh_3809	0	2	2	2	2	1	4	2	2	8	7	0.875	-	Agabi_varbisH97_2_183107	Armosto1_258519	Auramp1_550382	Copci_AmutBmut1_461860		Mk_01062700	PleosPC15_2_1073634	Ptegra1_19149	Schco3_2608109	IPR007110::Immunoglobulin-like domain::2										95
Cons_CM-specific	orbh_5796	0	4	4	4	4	4	4	4	0	7	7	1	-	Agabi_varbisH97_2_189838	Armosto1_269579	Auramp1_404073			Mk_00791200	PleosPC15_2_1070108	Ptegra1_591512	Schco3_2609519
Cons_CM-specific	orbh_5958	0	2	4	4	4	4	4	4	0	7	7	1	-	Agabi_varbisH97_2_132801	Armosto1_269076	Auramp1_486081			Mk_01287500	PleosPC15_2_1088636	Ptegra1_558763	Schco3_2744136
Cons_CM-specific	orbh_5640	0	2	4	4	4	4	2	2	0	7	7	1	-	Agabi_varbisH97_2_65529	Armosto1_253344	Auramp1_492214			Mk_00479900	PleosPC15_2_685	Ptegra1_547455	Schco3_2643142
Cons_CM-specific	orbh_3979	0	2	4	4	2	2	4	4	1	8	7	0.875	-	Agabi_varbisH97_2_190321	Armosto1_258257	Auramp1_404015	Copci_AmutBmut1_390887		Mk_01051600	PleosPC15_2_1087800	Ptegra1_582167	Schco3_2605353											74
Cons_CM-specific	orbh_4094	0	1	4	4	2	2	4	2	4	8	7	0.875	-	Agabi_varbisH97_2_192803	Armosto1_250979	Auramp1_4727	Copci_AmutBmut1_469409		Mk_00677600	PleosPC15_2_1089643	Ptegra1_6468	Schco3_2631148											69
Cons_CM-specific	orbh_4156	0	2	4	4	2	4	4	2	1	8	7	0.875	-	Agabi_varbisH97_2_194387	Armosto1_260245	Auramp1_574265	Copci_AmutBmut1_446134		Mk_00271200	PleosPC15_2_1034182	Ptegra1_567196	Schco3_2633155											71
Cons_CM-specific	orbh_5249	0	0	2	4	4	4	4	2	2	7	7	1	-	Agabi_varbisH97_2_123396	Armosto1_270294	Auramp1_627443	Copci_AmutBmut1_463949		Mk_00386700	PleosPC15_2_1113158		Schco3_2702058											1
Cons_CM-specific	orbh_5232	0	2	4	0	2	1	4	2	4	7	6	0.857143	-	Agabi_varbisH97_2_120671	Armosto1_270726	Auramp1_515027	Copci_AmutBmut1_497957			PleosPC15_2_1098282	Ptegra1_653264	Schco3_2551165											50
Cons_CM-specific	orbh_5237	0	1	4	0	4	4	4	4	4	7	6	0.857143	-	Agabi_varbisH97_2_122137	Armosto1_252766	Auramp1_571375	Copci_AmutBmut1_41983			PleosPC15_2_1059676	Ptegra1_40287	Schco3_1176499											37
Cons_CM-specific	orbh_5386	0	1	4	0	4	4	4	4	4	7	6	0.857143	-	Agabi_varbisH97_2_191878	Armosto1_261942	Auramp1_564497	Copci_AmutBmut1_537820			PleosPC15_2_1054867	Ptegra1_561022	Schco3_2621423											91
Cons_CM-specific	orbh_5871	0	4	4	0	4	4	4	1	4	7	6	0.857143	-	Agabi_varbisH97_2_117746	Armosto1_250496	Auramp1_563172	Copci_AmutBmut1_463506			PleosPC15_2_1104401	Ptegra1_604311	Schco3_2508268											2
Cons_CM-specific	orbh_6373	0	4	4	4	0	4	4	0	4	6	6	1	-		Armosto1_269015		Copci_AmutBmut1_282365		Mk_01295600	PleosPC15_2_1102088	Ptegra1_504213	Schco3_2610793											2
Cons_CM-specific	orbh_6436	0	0	4	4	4	4	4	0	4	6	6	1	-		Armosto1_251566	Auramp1_494697	Copci_AmutBmut1_442986		Mk_00781300	PleosPC15_2_1025100		Schco3_1193026											28
Cons_CM-specific	orbh_6460	0	0	4	0	4	4	4	4	4	6	6	1	-	Agabi_varbisH97_2_192869	Armosto1_253198	Auramp1_568082	Copci_AmutBmut1_541745			PleosPC15_2_1107302		Schco3_2627477											51
Cons_CM-specific	orbh_5065	1	2	4	4	0	4	4	1	4	8	6	0.857143	-	Agabi_varbisH97_2_121668	Armosto1_254602		Copci_AmutBmut1_449834	Cryne_JEC21_1_737	Mk_00252300	PleosPC15_2_1108476	Ptegra1_583835	Schco3_2553204	IPR035992::Ricin B-like lectins::1										2
Cons_CM-specific	orbh_4193	0	1	1	4	4	4	4	4	2	8	6	0.75	-	Agabi_varbisH97_2_195264	Armosto1_271926	Auramp1_548720	Copci_AmutBmut1_544392		Mk_01108400	PleosPC15_2_157989	Ptegra1_275227	Schco3_1209479											39
Cons_CM-specific	orbh_4235	0	1	4	4	2	1	4	4	4	8	6	0.75	-	Agabi_varbisH97_2_196245	Armosto1_260467	Auramp1_558256	Copci_AmutBmut1_463797		Mk_00840000	PleosPC15_2_1017028	Ptegra1_507850	Schco3_2614085											76
Cons_CM-specific	orbh_4765	0	1	4	4	1	2	4	4	4	8	6	0.75	-	Agabi_varbisH97_2_139656	Armosto1_255622	Auramp1_570880	Copci_AmutBmut1_399253		Mk_01467300	PleosPC15_2_172531	Ptegra1_599548	Schco3_2695850											18
Cons_CM-specific	orbh_4891	0	1	4	4	2	1	4	4	4	8	6	0.75	-	Agabi_varbisH97_2_120364	Armosto1_268046	Auramp1_539067	Copci_AmutBmut1_372619		Mk_00426000	PleosPC15_2_1034827	Ptegra1_577088	Schco3_2604411											74
Cons_CM-specific	orbh_5224	0	0	4	4	1	2	4	4	4	7	6	0.857143	-	Agabi_varbisH97_2_119664	Armosto1_256321	Auramp1_106582	Copci_AmutBmut1_331006		Mk_00438900	PleosPC15_2_1060260		Schco3_2622199											32
Cons_CM-specific	orbh_5712	0	4	4	4	1	2	4	0	4	7	6	0.857143	-		Armosto1_261757	Auramp1_59030	Copci_AmutBmut1_177984		Mk_01351300	PleosPC15_2_1098528	Ptegra1_516219	Schco3_2053508											1
Cons_CM-specific	orbh_5743	0	2	0	4	4	4	4	1	4	7	6	0.857143	-	Agabi_varbisH97_2_118993	Armosto1_264754	Auramp1_488619	Copci_AmutBmut1_89546		Mk_01043400		Ptegra1_604011	Schco3_2497734											3
Cons_CM-specific	orbh_5291	0	0	4	1	4	4	2	4	4	7	6	0.857143	-	Agabi_varbisH97_2_178273	Armosto1_250912	Auramp1_473284	Copci_AmutBmut1_356538		Mk_00662500	PleosPC15_2_1104708		Schco3_2690320	IPR042403::Spt21/Ams2::2										34
Cons_CM-specific	orbh_5474	0	1	4	0	4	4	4	2	4	7	6	0.857143	-	Agabi_varbisH97_2_200165	Armosto1_257822	Auramp1_73063	Copci_AmutBmut1_496267			PleosPC15_2_1031609	Ptegra1_557732	Schco3_2483876											79
Cons_CM-specific	orbh_5711	0	1	4	2	4	4	4	0	4	7	6	0.857143	-		Armosto1_261722	Auramp1_534033	Copci_AmutBmut1_467706		Mk_00083500	PleosPC15_2_1083090	Ptegra1_560909	Schco3_2253250											18
Cons_CM-specific	orbh_6299	0	0	4	4	4	4	2	0	4	6	6	1	-		Armosto1_259804	Auramp1_483824	Copci_AmutBmut1_379325		Mk_00415500	PleosPC15_2_1091096		Schco3_2320448											2
Cons_CM-specific	orbh_6360	0	2	4	0	4	4	4	0	4	6	6	1	-		Armosto1_268486	Auramp1_487396	Copci_AmutBmut1_416407			PleosPC15_2_173051	Ptegra1_570653	Schco3_2611610											73
Cons_CM-specific	orbh_6430	0	2	4	4	4	4	0	0	4	6	6	1	-			Auramp1_483851	Copci_AmutBmut1_354120		Mk_01371500	PleosPC15_2_163754	Ptegra1_571375	Schco3_1154428	IPR036915::Cyclin-like superfamily::1										35
Cons_CM-specific	orbh_4220	0	2	4	2	1	1	4	4	4	8	6	0.75	-	Agabi_varbisH97_2_195868	Armosto1_262555	Auramp1_625889	Copci_AmutBmut1_424398		Mk_01001700	PleosPC15_2_1039578	Ptegra1_586058	Schco3_1138708											83
Cons_CM-specific	orbh_4454	0	1	2	1	4	4	4	4	2	8	6	0.75	-	Agabi_varbisH97_2_215418	Armosto1_268600	Auramp1_398064	Copci_AmutBmut1_440006		Mk_00816000	PleosPC15_2_1092285	Ptegra1_565382	Schco3_2489963											94
Cons_CM-specific	orbh_3050	0	0	2	1	4	4	2	4	4	7	6	0.857143	-	Agabi_varbisH97_2_198818	Armosto1_255608	Auramp1_508678	Copci_AmutBmut1_544192		Mk_01230200	PleosPC15_2_1110383		Schco3_2608307											85
Cons_CM-specific	orbh_5877	0	2	4	0	2	4	1	4	4	7	6	0.857143	-	Agabi_varbisH97_2_139093	Armosto1_249856	Auramp1_58016	Copci_AmutBmut1_354786			PleosPC15_2_1014718	Ptegra1_534496	Schco3_2637962											60
Cons_CM-specific	orbh_6518	0	0	4	2	0	2	4	4	4	6	6	1	-	Agabi_varbisH97_2_183753	Armosto1_257059		Copci_AmutBmut1_179289		Mk_00275400	PleosPC15_2_174421		Schco3_2630516											25
Cons_CM-specific	orbh_5777	0	2	0	2	1	2	4	2	4	7	6	0.857143	-	Agabi_varbisH97_2_114071	Armosto1_268511	Auramp1_571951	Copci_AmutBmut1_460405		Mk_00821100		Ptegra1_591539	Schco3_2490513	IPR003961::Fibronectin type III::1										2
Cons_CM-specific	orbh_5698	0	2	4	4	4	4	4	1	0	7	6	0.857143	-	Agabi_varbisH97_2_180762	Armosto1_261299	Auramp1_525800			Mk_01156000	PleosPC15_2_1109155	Ptegra1_605768	Schco3_2639642
Cons_CM-specific	orbh_6241	0	2	4	4	4	4	4	0	0	6	6	1	-		Armosto1_250913	Auramp1_7888			Mk_00663100	PleosPC15_2_1112827	Ptegra1_587580	Schco3_2583266
Cons_CM-specific	orbh_6462	0	0	4	4	4	4	4	2	0	6	6	1	-	Agabi_varbisH97_2_133709	Armosto1_258293	Auramp1_569703			Mk_01048500	PleosPC15_2_1099364		Schco3_2605466
Cons_CM-specific	orbh_6526	0	0	4	4	2	4	4	0	4	6	6	1	-		Armosto1_250159	Auramp1_625389	Copci_AmutBmut1_415568		Mk_00722800	PleosPC15_2_1071137		Schco3_2633980
Cons_CM-specific	orbh_6170	0	2	4	0	4	4	4	2	0	6	6	1	-	Agabi_varbisH97_2_206745	Armosto1_270568	Auramp1_503038				PleosPC15_2_1045027	Ptegra1_648179	Schco3_2491032	IPR018499::Tetraspanin/Peripherin::5
Cons_CM-specific	orbh_6278	0	2	4	0	4	4	4	2	0	6	6	1	-	Agabi_varbisH97_2_75217	Armosto1_256279	Auramp1_211910				PleosPC15_2_1109370	Ptegra1_16033	Schco3_85873	IPR007292::Nuclear fusion protein Kar5::6
Cons_CM-specific	orbh_3771	0	1	2	4	2	1	4	4	4	8	6	0.75	-	Agabi_varbisH97_2_180405	Armosto1_253996	Auramp1_164936	Copci_AmutBmut1_496393		Mk_00247100	PleosPC15_2_1033633	Ptegra1_648730	Schco3_1154396											74
Cons_CM-specific	orbh_5059	0	2	1	4	1	2	4	4	4	8	6	0.75	-	Agabi_varbisH97_2_190703	Armosto1_257761	Auramp1_500157	Copci_AmutBmut1_444242		Mk_01188500	PleosPC15_2_1087894	Ptegra1_3067	Schco3_2025596											17
Cons_CM-specific	orbh_5293	0	2	4	4	0	1	4	4	2	7	6	0.857143	-	Agabi_varbisH97_2_178672	Armosto1_251492		Copci_AmutBmut1_462284		Mk_01343200	PleosPC15_2_175530	Ptegra1_557608	Schco3_2142005											20
Cons_CM-specific	orbh_5492	0	0	1	4	2	4	4	4	2	7	6	0.857143	-	Agabi_varbisH97_2_203833	Armosto1_250801	Auramp1_625173	Copci_AmutBmut1_494535		Mk_01430100	PleosPC15_2_1104315		Schco3_2510498											29
Cons_CM-specific	orbh_5638	0	1	0	4	2	2	4	4	4	7	6	0.857143	-	Agabi_varbisH97_2_191528	Armosto1_253248	Auramp1_252831	Copci_AmutBmut1_422611		Mk_00687800		Ptegra1_367570	Schco3_2642857											48
Cons_CM-specific	orbh_6420	0	0	4	4	2	2	4	0	4	6	6	1	-		Armosto1_250730	Auramp1_473205	Copci_AmutBmut1_457690		Mk_00675500	PleosPC15_2_158498		Schco3_2583181											65
Cons_CM-specific	orbh_6497	0	0	4	4	2	2	4	0	4	6	6	1	-		Armosto1_250954	Auramp1_472481	Copci_AmutBmut1_466289		Mk_01418700	PleosPC15_2_1089657		Schco3_2630869											72
Cons_CM-specific	orbh_6338	0	2	4	2	2	4	4	0	0	6	6	1	-		Armosto1_265203	Auramp1_548184			Mk_01138300	PleosPC15_2_1108386	Ptegra1_509823	Schco3_2639080
Cons_CM-specific	orbh_5433	0	1	4	2	4	2	2	2	0	7	6	0.857143	-	Agabi_varbisH97_2_194441	Armosto1_254921	Auramp1_384807			Mk_00572400	PleosPC15_2_1068800	Ptegra1_593761	Schco3_2637291
Cons_CM-specific	orbh_6267	0	2	2	4	2	4	2	0	0	6	6	1	-		Armosto1_254003	Auramp1_483982			Mk_00241900	PleosPC15_2_164822	Ptegra1_563600	Schco3_2629029
Cons_CM-specific	orbh_5766	0	1	2	2	2	2	2	2	0	7	6	0.857143	-	Agabi_varbisH97_2_183629	Armosto1_267249	Auramp1_565000			Mk_01132400	PleosPC15_2_1099993	Ptegra1_604871	Schco3_2623156
Cons_CM-specific	orbh_4265	0	1	4	2	1	2	4	2	4	8	6	0.75	-	Agabi_varbisH97_2_198988	Armosto1_258245	Auramp1_497727	Copci_AmutBmut1_494944		Mk_01213600	PleosPC15_2_1052272	Ptegra1_577604	Schco3_2605416											99
Cons_CM-specific	orbh_5655	0	1	2	2	2	4	4	0	4	7	6	0.857143	-		Armosto1_253917	Auramp1_401205	Copci_AmutBmut1_372646		Mk_00320300	PleosPC15_2_1081201	Ptegra1_526017	Schco3_2519211											44
Cons_CM-specific	orbh_3971	0	1	4	4	1	1	4	4	4	8	5	0.625	-	Agabi_varbisH97_2_190194	Armosto1_262526	Auramp1_565340	Copci_AmutBmut1_457942		Mk_01078500	PleosPC15_2_1083328	Ptegra1_608189	Schco3_2621050	IPR018606::Argoute-binding protein 1::3										93
Cons_CM-specific	orbh_4158	0	4	4	4	1	1	4	1	4	8	5	0.625	-	Agabi_varbisH97_2_194464	Armosto1_263296	Auramp1_131352	Copci_AmutBmut1_364931		Mk_00581000	PleosPC15_2_1068816	Ptegra1_530816	Schco3_2637740											91
Cons_CM-specific	orbh_4736	0	1	4	4	1	1	4	4	4	8	5	0.625	-	Agabi_varbisH97_2_119234	Armosto1_252177	Auramp1_431131	Copci_AmutBmut1_456820		Mk_00288400	PleosPC15_2_1041831	Ptegra1_396903	Schco3_2640110											38
Cons_CM-specific	orbh_6039	0	0	4	0	4	1	4	4	4	6	5	0.833333	-	Agabi_varbisH97_2_119346	Armosto1_271133	Auramp1_165151	Copci_AmutBmut1_521489			PleosPC15_2_160374		Schco3_2629048	IPR027948::Protein of unknown function (DUF4436)::4										74
Cons_CM-specific	orbh_6044	0	1	0	0	4	4	4	4	4	6	5	0.833333	-	Agabi_varbisH97_2_120553	Armosto1_263289	Auramp1_464951	Copci_AmutBmut1_476055				Ptegra1_421806	Schco3_2637192											1
Cons_CM-specific	orbh_6320	0	1	4	4	4	0	4	0	4	6	5	0.833333	-		Armosto1_262267	Auramp1_67502	Copci_AmutBmut1_20681		Mk_00981900	PleosPC15_2_1038743	Ptegra1_636489												69
Cons_CM-specific	orbh_6615	0	0	4	0	4	4	0	4	4	5	5	1	-	Agabi_varbisH97_2_140639		Auramp1_570643	Copci_AmutBmut1_416872			PleosPC15_2_1111375		Schco3_2675809											1
Cons_CM-specific	orbh_6874	0	0	4	0	4	4	4	0	4	5	5	1	-		Armosto1_269629	Auramp1_79106	Copci_AmutBmut1_472066			PleosPC15_2_1088721		Schco3_2460241											2
Cons_CM-specific	orbh_6911	0	0	0	4	4	4	4	0	4	5	5	1	-		Armosto1_250360	Auramp1_36937	Copci_AmutBmut1_500944		Mk_00141000			Schco3_2636647											31
Cons_CM-specific	orbh_6950	0	0	0	4	4	4	0	4	4	5	5	1	-	Agabi_varbisH97_2_195496		Auramp1_490329	Copci_AmutBmut1_450143		Mk_00281600			Schco3_2625875											5
Cons_CM-specific	orbh_6994	0	4	4	4	0	0	4	0	4	5	5	1	-		Armosto1_253250		Copci_AmutBmut1_229304		Mk_00182400	PleosPC15_2_1046404	Ptegra1_591120												53
Cons_CM-specific	orbh_7014	0	0	4	0	4	4	0	4	4	5	5	1	-	Agabi_varbisH97_2_116511		Auramp1_581415	Copci_AmutBmut1_441259			PleosPC15_2_1114051		Schco3_2645648											7
Cons_CM-specific	orbh_5395	0	1	0	1	4	4	4	2	4	7	5	0.714286	-	Agabi_varbisH97_2_192178	Armosto1_259284	Auramp1_260775	Copci_AmutBmut1_446729		Mk_01113700		Ptegra1_556293	Schco3_1111076	IPR043129::ATPase; nucleotide binding domain::7										34
Cons_CM-specific	orbh_5793	0	2	4	0	1	4	4	1	4	7	5	0.714286	-	Agabi_varbisH97_2_178251	Armosto1_269082	Auramp1_474101	Copci_AmutBmut1_356676			PleosPC15_2_158384	Ptegra1_599786	Schco3_2703156											92
Cons_CM-specific	orbh_6474	0	4	2	0	4	1	4	0	4	6	5	0.833333	-		Armosto1_261712	Auramp1_479457	Copci_AmutBmut1_153273			PleosPC15_2_1089076	Ptegra1_601249	Schco3_2621753											61
Cons_CM-specific	orbh_6051	0	0	0	1	2	4	4	4	4	6	5	0.833333	-	Agabi_varbisH97_2_121403	Armosto1_253420	Auramp1_23367	Copci_AmutBmut1_375578		Mk_01352700			Schco3_2364769											1
Cons_CM-specific	orbh_6313	0	0	4	2	1	4	4	0	4	6	5	0.833333	-		Armosto1_261931	Auramp1_479085	Copci_AmutBmut1_412207		Mk_00103800	PleosPC15_2_1030506		Schco3_2621301											91
Cons_CM-specific	orbh_6626	0	0	4	0	4	4	0	2	4	5	5	1	-	Agabi_varbisH97_2_178270		Auramp1_446949	Copci_AmutBmut1_323765			PleosPC15_2_1104655		Schco3_2631586											4
Cons_CM-specific	orbh_5966	0	2	4	0	4	2	4	0	1	6	5	0.833333	-		Armosto1_269558	Auramp1_404527	Copci_AmutBmut1_357513			PleosPC15_2_1101366	Ptegra1_145368	Schco3_2486756											17
Cons_CM-specific	orbh_6052	0	4	0	4	4	4	4	1	0	6	5	0.833333	-	Agabi_varbisH97_2_121797	Armosto1_271870	Auramp1_402834			Mk_01399600		Ptegra1_564257	Schco3_1216282
Cons_CM-specific	orbh_6538	0	0	4	4	0	4	4	4	1	6	5	0.833333	-	Agabi_varbisH97_2_195288	Armosto1_252826		Copci_AmutBmut1_97362		Mk_00531000	PleosPC15_2_1090711		Schco3_2641770
Cons_CM-specific	orbh_6751	0	0	4	4	4	4	4	0	0	5	5	1	-		Armosto1_252299	Auramp1_584870			Mk_00510300	PleosPC15_2_1114433		Schco3_2557059
Cons_CM-specific	orbh_7053	0	0	0	4	4	4	4	4	0	5	5	1	-	Agabi_varbisH97_2_181570	Armosto1_250090	Auramp1_473573			Mk_00700400			Schco3_2669596
Cons_CM-specific	orbh_7151	0	4	4	0	4	4	0	4	0	5	5	1	-	Agabi_varbisH97_2_195403		Auramp1_499645				PleosPC15_2_1108717	Ptegra1_574445	Schco3_2614109
Cons_CM-specific	orbh_6017	0	2	0	4	4	4	4	1	0	6	5	0.833333	-	Agabi_varbisH97_2_113898	Armosto1_268988	Auramp1_546545			Mk_01497600		Ptegra1_564603	Schco3_2529484
Cons_CM-specific	orbh_6065	0	1	4	0	2	4	4	4	0	6	5	0.833333	-	Agabi_varbisH97_2_137503	Armosto1_271263	Auramp1_568521				PleosPC15_2_31380	Ptegra1_558366	Schco3_107357
Cons_CM-specific	orbh_6465	0	4	4	4	1	2	4	0	0	6	5	0.833333	-		Armosto1_253994	Auramp1_572135			Mk_00302100	PleosPC15_2_1093635	Ptegra1_565288	Schco3_2638739
Cons_CM-specific	orbh_6737	0	4	0	4	2	4	4	0	0	5	5	1	-		Armosto1_250615	Auramp1_544114			Mk_00683200		Ptegra1_313656	Schco3_2346424
Cons_CM-specific	orbh_6888	0	0	0	4	4	4	4	2	0	5	5	1	-	Agabi_varbisH97_2_137899	Armosto1_271012	Auramp1_124827			Mk_00918800			Schco3_2664679
Cons_CM-specific	orbh_7082	0	4	4	4	2	4	0	0	0	5	5	1	-			Auramp1_498550			Mk_01348900	PleosPC15_2_1088203	Ptegra1_602141	Schco3_2513759
Cons_CM-specific	orbh_6887	0	0	0	4	4	4	4	4	0	5	5	1	-	Agabi_varbisH97_2_137087	Armosto1_270881	Auramp1_549528			Mk_00914900			Schco3_2664662											58
Cons_CM-specific	orbh_7158	0	0	0	4	4	4	4	0	4	5	5	1	-		Armosto1_249864	Auramp1_635348	Copci_AmutBmut1_546385		Mk_00620700			Schco3_2683629											5
Cons_CM-specific	orbh_4738	0	4	2	4	1	1	4	1	4	8	5	0.625	-	Agabi_varbisH97_2_190934	Armosto1_252358	Auramp1_634494	Copci_AmutBmut1_371733		Mk_01358500	PleosPC15_2_1068135	Ptegra1_565535	Schco3_2670729											42
Cons_CM-specific	orbh_5394	0	4	0	4	1	1	4	2	4	7	5	0.714286	-	Agabi_varbisH97_2_192157	Armosto1_260934	Auramp1_513899	Copci_AmutBmut1_448254		Mk_01315900		Ptegra1_560334	Schco3_1138552											83
Cons_CM-specific	orbh_6187	0	1	4	4	0	0	2	4	4	6	5	0.833333	-	Agabi_varbisH97_2_220534	Armosto1_259256		Copci_AmutBmut1_447390		Mk_00961400	PleosPC15_2_1022539	Ptegra1_574660												82
Cons_CM-specific	orbh_6654	0	2	4	4	0	0	0	4	4	5	5	1	-	Agabi_varbisH97_2_190996			Copci_AmutBmut1_280527		Mk_00847100	PleosPC15_2_165797	Ptegra1_571495		IPR009784::Protein of unknown function DUF1349::5										170	NCU04522_Neucr AN7484_Aspnid	Verified ORF Protein expressed at increased levels during osmoadaptation contains a DUF1349 domain
Cons_CM-specific	orbh_6681	0	0	4	4	0	0	4	2	4	5	5	1	-	Agabi_varbisH97_2_201559	Armosto1_252996		Copci_AmutBmut1_366895		Mk_01016400	PleosPC15_2_1090489													25
Cons_CM-specific	orbh_6735	0	0	4	4	0	0	4	2	4	5	5	1	-	Agabi_varbisH97_2_117989	Armosto1_250407		Copci_AmutBmut1_48133		Mk_00655100	PleosPC15_2_1104485													6
Cons_CM-specific	orbh_6811	0	2	4	4	0	0	4	0	4	5	5	1	-		Armosto1_261481		Copci_AmutBmut1_470424		Mk_00053300	PleosPC15_2_1039137	Ptegra1_500711												67
Cons_CM-specific	orbh_3633	0	4	1	1	1	1	4	4	4	8	4	0.5	-	Agabi_varbisH97_2_136647	Armosto1_263134	Auramp1_572827	Copci_AmutBmut1_418092		Mk_01016600	PleosPC15_2_1056930	Ptegra1_538777	Schco3_2603309	IPR018466::Kre9/Knh1 family::1										76
Cons_CM-specific	orbh_4523	0	1	4	1	1	1	4	4	4	8	4	0.5	-	Agabi_varbisH97_2_224560	Armosto1_264120	Auramp1_508134	Copci_AmutBmut1_369248		Mk_00896500	PleosPC15_2_1035733	Ptegra1_654630	Schco3_2481445	IPR018712::Domain of unknown function DUF2235::8	IPR029058::Alpha/Beta hydrolase fold::6									150
Cons_CM-specific	orbh_6210	0	1	4	0	1	4	0	4	4	6	4	0.666667	-	Agabi_varbisH97_2_60928		Auramp1_397610	Copci_AmutBmut1_493962			PleosPC15_2_1088671	Ptegra1_564588	Schco3_2611490	IPR032710::NTF2-like domain superfamily::2										70
Cons_CM-specific	orbh_6378	0	4	4	0	1	1	4	0	4	6	4	0.666667	-		Armosto1_269737	Auramp1_163605	Copci_AmutBmut1_247705			PleosPC15_2_163728	Ptegra1_607116	Schco3_2629381											23
Cons_CM-specific	orbh_6706	0	0	4	0	0	4	1	4	4	5	4	0.8	-	Agabi_varbisH97_2_216653	Armosto1_260809		Copci_AmutBmut1_500554			PleosPC15_2_152479		Schco3_2699348											46
Cons_CM-specific	orbh_6717	0	0	4	0	4	4	0	1	4	5	4	0.8	-	Agabi_varbisH97_2_43799		Auramp1_494931	Copci_AmutBmut1_450551			PleosPC15_2_154224		Schco3_2640924											62
Cons_CM-specific	orbh_6858	0	1	0	0	4	4	4	0	4	5	4	0.8	-		Armosto1_268111	Auramp1_593077	Copci_AmutBmut1_189663				Ptegra1_606825	Schco3_2522123											39
Cons_CM-specific	orbh_7227	0	0	0	0	4	4	0	4	4	4	4	1	-	Agabi_varbisH97_2_195685		Auramp1_566052	Copci_AmutBmut1_416098					Schco3_2628501											35
Cons_CM-specific	orbh_6297	0	1	4	4	4	1	4	0	0	6	4	0.666667	-		Armosto1_258735	Auramp1_29840			Mk_01469400	PleosPC15_2_1035770	Ptegra1_71268	Schco3_2644479	IPR018712::Domain of unknown function DUF2235::6	IPR029058::Alpha/Beta hydrolase fold::5
Cons_CM-specific	orbh_6326	0	0	4	4	1	1	4	4	0	6	4	0.666667	-	Agabi_varbisH97_2_179632	Armosto1_264357	Auramp1_563895			Mk_00641300	PleosPC15_2_154749		Schco3_2670175
Cons_CM-specific	orbh_6463	0	1	4	0	1	4	4	4	0	6	4	0.666667	-	Agabi_varbisH97_2_113702	Armosto1_262856	Auramp1_570783				PleosPC15_2_1111794	Ptegra1_564305	Schco3_2567724
Cons_CM-specific	orbh_6909	0	1	4	4	4	4	0	0	0	5	4	0.8	-			Auramp1_221686			Mk_00323200	PleosPC15_2_1089264	Ptegra1_561289	Schco3_2619440
Cons_CM-specific	orbh_6949	0	1	4	0	4	4	4	0	0	5	4	0.8	-		Armosto1_253590	Auramp1_489882				PleosPC15_2_1071120	Ptegra1_565686	Schco3_2485856
Cons_CM-specific	orbh_6972	0	4	4	0	4	1	4	0	0	5	4	0.8	-		Armosto1_254318	Auramp1_549727				PleosPC15_2_1107407	Ptegra1_561783	Schco3_2503248
Cons_CM-specific	orbh_67045	0	0	4	4	0	0	4	0	4	4	4	1	-		Armosto1_254956		Copci_AmutBmut1_368245		Mk_00518900	PleosPC15_2_1104593
Cons_CM-specific	orbh_7426	0	0	0	4	4	4	4	0	0	4	4	1	-		Armosto1_268885	Auramp1_191490			Mk_00254900			Schco3_231789
Cons_CM-specific	orbh_7532	0	0	0	4	4	4	4	0	0	4	4	1	-		Armosto1_271365	Auramp1_504633			Mk_00047300			Schco3_2616565
Cons_CM-specific	orbh_7744	0	0	4	0	4	4	4	0	0	4	4	1	-		Armosto1_261482	Auramp1_534512				PleosPC15_2_1088928		Schco3_2667336
Cons_CM-specific	orbh_4702	0	1	4	4	1	1	4	1	4	8	4	0.5	-	Agabi_varbisH97_2_117871	Armosto1_250292	Auramp1_475127	Copci_AmutBmut1_493517		Mk_00671100	PleosPC15_2_176320	Ptegra1_334376	Schco3_2635496											46
Cons_CM-specific	orbh_5516	0	0	1	4	4	4	1	1	4	7	4	0.571429	-	Agabi_varbisH97_2_209029	Armosto1_249972	Auramp1_163255	Copci_AmutBmut1_496027		Mk_00398100	PleosPC15_2_1079934		Schco3_2322551	IPR018713::Domain of unknown function DUF2236::3										189	NCU05384_Neucr
Cons_CM-specific	orbh_5894	0	1	4	4	4	1	0	1	4	7	4	0.571429	-	Agabi_varbisH97_2_190039		Auramp1_500997	Copci_AmutBmut1_377371		Mk_00807400	PleosPC15_2_1101558	Ptegra1_579425	Schco3_2486984											80
Cons_CM-specific	orbh_6590	0	1	4	4	0	0	0	4	4	5	4	0.8	-	Agabi_varbisH97_2_118344			Copci_AmutBmut1_22170		Mk_01102600	PleosPC15_2_1089663	Ptegra1_557297												7
Cons_CM-specific	orbh_6937	0	0	0	4	1	4	0	4	4	5	4	0.8	-	Agabi_varbisH97_2_194026		Auramp1_476891	Copci_AmutBmut1_442025		Mk_00534500			Schco3_2703529											93	AN7378_Aspnid	Uncharacterized ORF
Cons_CM-specific	orbh_7016	0	0	4	4	4	1	0	0	4	5	4	0.8	-			Auramp1_562837	Copci_AmutBmut1_446133		Mk_00539500	PleosPC15_2_1059391		Schco3_236140											67
Cons_CM-specific	orbh_6499	0	4	1	4	0	1	4	0	4	6	4	0.666667	-		Armosto1_265583		Copci_AmutBmut1_476168		Mk_00179700	PleosPC15_2_1030474	Ptegra1_656795	Schco3_2612010	IPR021765::Mycotoxin biosynthesis protein UstYa-like::6										72
Cons_CM-specific	orbh_1222	1	2	4	2	1	2	4	4	2	9	7	0.875	-	Agabi_varbisH97_2_190566	Armosto1_257906	Auramp1_500855	Copci_AmutBmut1_6654	Cryne_JEC21_1_3126	Mk_01193400	PleosPC15_2_172505	Ptegra1_32719	Schco3_2606067											79
Cons_CM-specific	orbh_152	1	4	2	4	2	1	2	4	2	9	7	0.875	-	Agabi_varbisH97_2_120172	Armosto1_251422	Auramp1_568777	Copci_AmutBmut1_498275	Cryne_JEC21_1_5664	Mk_00437100	PleosPC15_2_1069887	Ptegra1_501699	Schco3_1216429	IPR012677::Nucleotide-binding alpha-beta plait domain superfamily::9	IPR035979::R-binding domain superfamily::9	IPR000504::R recognition motif domain::9								3
Cons_CM-specific	orbh_1773	1	2	4	2	2	1	2	4	4	9	7	0.875	-	Agabi_varbisH97_2_195173	Armosto1_271921	Auramp1_549305	Copci_AmutBmut1_23471	Cryne_JEC21_1_2203	Mk_01129900	PleosPC15_2_62237	Ptegra1_548745	Schco3_2615250	IPR029048::Heat shock protein 70kD; C-termil domain superfamily::9	IPR029047::Heat shock protein 70kD; peptide-binding domain superfamily::9	IPR042050::Endoplasmic reticulum chaperone BIP; nucleotide-binding domain::9	IPR018181::Heat shock protein 70; conserved site::9	IPR013126::Heat shock protein 70 family::9	IPR043129::ATPase; nucleotide binding domain::9					419	YJL034W_KAR2_Sacce1 bip1_pombe bipA_Aspnig AN2062_bipA_Aspnid	Uncharacterized ORF Putative ER-resident chaperone of the HSP70 family unfolded-protein response (UPR) target gene transcript levels increase during the UPR		ER heat shock protein BiP	ATPase involved in protein import into the ER; also acts as a chaperone to mediate protein folding in the ER and may play a role in ER export of soluble proteins; regulates the unfolded protein response via interaction with Ire1p
Cons_CM-specific	orbh_2252	1	1	2	4	2	2	4	2	4	9	7	0.875	X	Agabi_varbisH97_2_207943	Armosto1_258906	Auramp1_630975	Copci_AmutBmut1_175000	Cryne_JEC21_1_1390	Mk_01065000	PleosPC15_2_1100597	Ptegra1_562736	Schco3_2636577	IPR016151::D mismatch repair protein MutS; N-termil::9	IPR007695::D mismatch repair protein MutS-like; N-termil::9	IPR036187::D mismatch repair protein MutS; core domain superfamily::9	IPR017261::D mismatch repair protein MutS/MSH::9	IPR000432::D mismatch repair protein MutS; C-termil::9	IPR007696::D mismatch repair protein MutS; core::9	IPR036678::MutS; connector domain superfamily::9	IPR007860::D mismatch repair protein MutS; connector domain::9	IPR027417::P-loop containing nucleoside triphosphate hydrolase::9	IPR007861::D mismatch repair protein MutS; clamp::7	428	YDR097C_MSH6_Sacce1 msh6_pombe msh6_Neucr			MutS protein homolog	Protein required for mismatch repair in mitosis and meiosis; forms a complex with Msh2p to repair both single-base & insertion-deletion mispairs; also involved in interstrand cross-link repair; potentially phosphorylated by Cdc28p
Cons_CM-specific	orbh_2472	1	2	4	2	1	2	4	4	2	9	7	0.875	-	Agabi_varbisH97_2_217672	Armosto1_254774	Auramp1_277585	Copci_AmutBmut1_434690	Cryne_JEC21_1_3388	Mk_01032300	PleosPC15_2_1047285	Ptegra1_645688	Schco3_2639582	IPR027267::AH/BAR domain superfamily::9	IPR001849::Pleckstrin homology domain::8	IPR011993::PH-like domain superfamily::8	IPR043453::Slm1; PH domain::8							345	YIL105C_SLM1_Sacce1 NCU03886_Neucr AN4171_Aspnid	Uncharacterized ORF Orthologs have role in TOR sigling; actin cytoskeleton organization; actin filament bundle assembly; eisosome assembly; endosomal transport and establishment or maintence of actin cytoskeleton polarity; <a href="#GOsection"more</a			Phosphoinositide PI4;5P(2) binding protein; forms a complex with Slm2p; acts downstream of Mss4p in a pathway regulating actin cytoskeleton organization in response to stress; phosphorylated by the TORC2 complex; protein abundance increases in response to D replication stress; SLM1 has a paralog; SLM2; that arose from the whole genome duplication
Cons_CM-specific	orbh_352	1	2	4	2	1	4	2	4	2	9	7	0.875	-	Agabi_varbisH97_2_138958	Armosto1_270580	Auramp1_482880	Copci_AmutBmut1_473813	Cryne_JEC21_1_1847	Mk_00522000	PleosPC15_2_35575	Ptegra1_610894	Schco3_2643776	IPR017926::Glutamine amidotransferase::9	IPR029062::Class I glutamine amidotransferase-like::9									282	AN0200_Aspnid NCU06311_Neucr YLR126C_YLR126C_Sacce1	Uncharacterized ORF			Putative glutamine amidotransferase; has Aft1p-binding motif in the promoter; may be involved in copper and iron homeostasis; YLR126C is not an essential protein; relocalizes from nucleus to cytoplasmic foci upon D replication stress
Cons_CM-specific	orbh_3841	0	2	4	2	1	2	4	2	4	8	7	0.875	-	Agabi_varbisH97_2_184545	Armosto1_261826	Auramp1_110649	Copci_AmutBmut1_354939		Mk_00098300	PleosPC15_2_1076073	Ptegra1_613522	Schco3_2730626	IPR000210::BTB/POZ domain::1										91
Cons_CM-specific	orbh_3950	0	2	2	2	1	4	4	2	4	8	7	0.875	-	Agabi_varbisH97_2_189718	Armosto1_268632	Auramp1_566386	Copci_AmutBmut1_429742		Mk_00832200	PleosPC15_2_1062660	Ptegra1_610105	Schco3_2609831	IPR008972::Cupredoxin::8										77
Cons_CM-specific	orbh_4032	0	2	4	4	2	1	4	2	2	8	7	0.875	-	Agabi_varbisH97_2_191527	Armosto1_253246	Auramp1_491843	Copci_AmutBmut1_366639		Mk_00687600	PleosPC15_2_1046591	Ptegra1_587941	Schco3_2673009	IPR012816::DAR::8	IPR037238::YbiA-like superfamily::8									49
Cons_CM-specific	orbh_4063	0	2	2	4	2	4	2	1	4	8	7	0.875	-	Agabi_varbisH97_2_192103	Armosto1_262151	Auramp1_480876	Copci_AmutBmut1_439558		Mk_00106800	PleosPC15_2_1103496	Ptegra1_560901	Schco3_1224680											38
Cons_CM-specific	orbh_4165	0	1	4	4	2	2	4	2	2	8	7	0.875	-	Agabi_varbisH97_2_194604	Armosto1_263292	Auramp1_407551	Copci_AmutBmut1_90959		Mk_00434000	PleosPC15_2_1068771	Ptegra1_531938	Schco3_2637254	IPR002018::Carboxylesterase; type B::8	IPR029058::Alpha/Beta hydrolase fold::8	IPR019826::Carboxylesterase type B; active site::5								147	AN6389_Aspnid	Uncharacterized ORF
Cons_CM-specific	orbh_4444	0	1	4	2	2	2	4	2	4	8	7	0.875	-	Agabi_varbisH97_2_214326	Armosto1_268581	Auramp1_426930	Copci_AmutBmut1_494762		Mk_00831300	PleosPC15_2_1036297	Ptegra1_524116	Schco3_2628008	IPR011013::Galactose mutarotase-like domain superfamily::8	IPR011071::Polysaccharide lyase family 8-like; C-termil::8	IPR003159::Polysaccharide lyase family 8; central domain::8	IPR012970::Polysaccharide lyase 8; N-termil alpha-helical::8	IPR008929::Chondroitin AC/algite lyase::8	IPR014718::Glycoside hydrolase-type carbohydrate-binding::8	IPR038970::Polysaccharide lyase 8::8	IPR004103::Polysaccharide lyase family 8; C-termil::8			109
Cons_CM-specific	orbh_4520	0	2	2	4	2	1	4	4	2	8	7	0.875	-	Agabi_varbisH97_2_224184	Armosto1_270945	Auramp1_414589	Copci_AmutBmut1_367102		Mk_00898900	PleosPC15_2_1090145	Ptegra1_569946	Schco3_2532542	IPR008978::HSP20-like chaperone::8	IPR002068::Alpha crystallin/Hsp20 domain::8	IPR031107::Small heat shock protein HSP20::7	IPR040612::ArsA; HSP20-like domain::3							123	AN5781_Aspnid	Uncharacterized ORF Putative 30 kilodalton heat shock protein transcript levels increase during the unfolded-protein response (UPR) palA-dependent expression independent of pH
Cons_CM-specific	orbh_4635	0	1	4	4	2	2	2	2	4	8	7	0.875	-	Agabi_varbisH97_2_70431	Armosto1_250691	Auramp1_563732	Copci_AmutBmut1_412752		Mk_00656300	PleosPC15_2_1104824	Ptegra1_562365	Schco3_2670548	IPR009044::ssD-binding transcriptiol regulator::8	IPR003173::Transcriptiol coactivator p15 (PC4)::8									126
Cons_CM-specific	orbh_4714	0	1	4	2	2	2	4	2	4	8	7	0.875	-	Agabi_varbisH97_2_192746	Armosto1_250568	Auramp1_476039	Copci_AmutBmut1_446337		Mk_00686600	PleosPC15_2_1104330	Ptegra1_590594	Schco3_2634355											2
Cons_CM-specific	orbh_4737	0	4	1	2	2	2	4	4	2	8	7	0.875	-	Agabi_varbisH97_2_179892	Armosto1_252198	Auramp1_541206	Copci_AmutBmut1_545459		Mk_00503400	PleosPC15_2_1017219	Ptegra1_368307	Schco3_2045557	IPR036910::High mobility group box domain superfamily::8	IPR009071::High mobility group box domain::8									64
Cons_CM-specific	orbh_4745	0	2	2	2	2	4	1	4	4	8	7	0.875	-	Agabi_varbisH97_2_191384	Armosto1_253118	Auramp1_240688	Copci_AmutBmut1_452078		Mk_00891000	PleosPC15_2_1066597	Ptegra1_654516	Schco3_2629906											75
Cons_CM-specific	orbh_4972	0	2	4	4	2	4	2	1	2	8	7	0.875	-	Agabi_varbisH97_2_221752	Armosto1_250585	Auramp1_393347	Copci_AmutBmut1_446391		Mk_00688400	PleosPC15_2_173736	Ptegra1_529232	Schco3_2632487	IPR026768::Protein FAM72::8										97
Cons_CM-specific	orbh_4985	0	2	2	4	1	2	4	2	4	8	7	0.875	-	Agabi_varbisH97_2_178097	Armosto1_268976	Auramp1_471954	Copci_AmutBmut1_355826		Mk_01049300	PleosPC15_2_1093620	Ptegra1_265892	Schco3_2630420	IPR031728::Beta-glucuronidase; C-termil::1	IPR017853::Glycoside hydrolase superfamily::1									7
Cons_CM-specific	orbh_4987	0	2	4	2	2	1	4	2	4	8	7	0.875	-	Agabi_varbisH97_2_180674	Armosto1_254592	Auramp1_473953	Copci_AmutBmut1_449757		Mk_01140500	PleosPC15_2_1079220	Ptegra1_514767	Schco3_2632699	IPR023393::START-like domain superfamily::8	IPR019587::Polyketide cyclase/dehydrase::5	IPR005031::Coenzyme Q-binding protein COQ10; START domain::2								124
Cons_CM-specific	orbh_5102	0	2	4	4	1	2	2	2	4	8	7	0.875	-	Agabi_varbisH97_2_145182	Armosto1_254843	Auramp1_402746	Copci_AmutBmut1_372928		Mk_00155400	PleosPC15_2_163060	Ptegra1_605813	Schco3_2671946	IPR036396::Cytochrome P450 superfamily::1	IPR001128::Cytochrome P450::1									14
Cons_CM-specific	orbh_5165	0	2	2	4	4	1	2	4	2	8	7	0.875	-	Agabi_varbisH97_2_179551	Armosto1_254859	Auramp1_510258	Copci_AmutBmut1_464965		Mk_01378100	PleosPC15_2_1023114	Ptegra1_574471	Schco3_2635863	IPR038753::NF-kappa-B inhibitor-like protein 1::2										62
Cons_CM-specific	orbh_5715	0	0	2	4	4	4	2	2	2	7	7	1	-	Agabi_varbisH97_2_68010	Armosto1_261828	Auramp1_480700	Copci_AmutBmut1_159306		Mk_00098500	PleosPC15_2_1089066		Schco3_2622918	IPR035923::TT1751-like domain superfamily::7	IPR005180::Domain of unknown function DUF302::5									52
Cons_CM-specific	orbh_5789	0	2	4	4	2	2	2	0	4	7	7	1	-		Armosto1_269004	Auramp1_486570	Copci_AmutBmut1_473064		Mk_01283400	PleosPC15_2_1092457	Ptegra1_564733	Schco3_2528960	IPR027795::CASTOR; ACT domain::6	IPR016540::Uncharacterised conserved protein UCP008459::2									107
Cons_CM-specific	orbh_5945	0	0	4	2	2	2	4	2	4	7	7	1	-	Agabi_varbisH97_2_195075	Armosto1_254416	Auramp1_495964	Copci_AmutBmut1_467961		Mk_01147700	PleosPC15_2_162109		Schco3_2671852											58
Cons_CM-specific	orbh_1641	1	1	2	2	2	2	2	4	4	9	7	0.875	-	Agabi_varbisH97_2_193941	Armosto1_271227	Auramp1_401678	Copci_AmutBmut1_382593	Cryne_JEC21_1_4722	Mk_00937300	PleosPC15_2_1045574	Ptegra1_604397	Schco3_2616091	IPR029058::Alpha/Beta hydrolase fold::9	IPR008758::Peptidase S28::9									314	scp_Neucr AN7231_Aspnid	Uncharacterized ORF Orthologs have serine-type endopeptidase activity and role in proteolysis		Sre1 cleavage activating protein; Scap Scp1
Cons_CM-specific	orbh_3055	1	2	4	2	2	1	4	2	2	9	7	0.875	-	Agabi_varbisH97_2_190999	Armosto1_256838	Auramp1_407669	Copci_AmutBmut1_379479	Cryne_JEC21_1_586	Mk_01236000	PleosPC15_2_173235	Ptegra1_588214	Schco3_2058879	IPR009071::High mobility group box domain::9	IPR036910::High mobility group box domain superfamily::9									58
Cons_CM-specific	orbh_533	1	2	2	4	1	4	2	2	2	9	7	0.875	-	Agabi_varbisH97_2_176400	Armosto1_255576	Auramp1_158237	Copci_AmutBmut1_461921	Cryne_JEC21_1_2488	Mk_01023300	PleosPC15_2_153260	Ptegra1_519949	Schco3_2608078	IPR003732::D-aminoacyl-tR deacylase DTD::9	IPR023509::D-aminoacyl-tR deacylase-like superfamily::9									407	YDL219W_DTD1_Sacce1 dtd1_pombe NCU03854_Neucr			D-Tyr-tR deacylase Dtd1 (predicted)	D-Tyr-tR(Tyr) deacylase; functions in protein translation; may affect nonsense suppression via alteration of the protein synthesis machinery; ubiquitous among eukaryotes
Cons_CM-specific	orbh_5061	1	2	2	4	2	2	4	0	2	8	7	1	-		Armosto1_250732	Auramp1_579788	Copci_AmutBmut1_446271	Cryne_JEC21_1_1382	Mk_00675300	PleosPC15_2_1056143	Ptegra1_470480	Schco3_2341986	IPR036420::BRCT domain superfamily::8	IPR001357::BRCT domain::8	IPR022047::Microcephalin-like::3								10
Cons_CM-specific	orbh_3539	0	2	4	2	1	2	2	2	4	8	7	0.875	-	Agabi_varbisH97_2_119001	Armosto1_264736	Auramp1_454196	Copci_AmutBmut1_356223		Mk_01418000	PleosPC15_2_1042936	Ptegra1_473488	Schco3_2618683	IPR028094::Restriction of telomere capping protein 4; C-termil::8	IPR039024::Restriction of telomere capping protein 4::8									9
Cons_CM-specific	orbh_3551	0	2	2	2	2	1	2	4	4	8	7	0.875	-	Agabi_varbisH97_2_119484	Armosto1_263648	Auramp1_439539	Copci_AmutBmut1_356207		Mk_00883900	PleosPC15_2_1071846	Ptegra1_592751	Schco3_2513013	IPR003807::Domain of unknown function DUF202::8										268	AN0682_Aspnid	Uncharacterized ORF
Cons_CM-specific	orbh_3556	0	1	4	2	2	2	4	2	2	8	7	0.875	-	Agabi_varbisH97_2_119841	Armosto1_271890	Auramp1_461778	Copci_AmutBmut1_401108		Mk_01134200	PleosPC15_2_1108303	Ptegra1_517099	Schco3_2638615											77
Cons_CM-specific	orbh_3648	0	1	2	2	2	4	4	2	2	8	7	0.875	-	Agabi_varbisH97_2_139240	Armosto1_269809	Auramp1_500053	Copci_AmutBmut1_480417		Mk_00353900	PleosPC15_2_1095075	Ptegra1_596697	Schco3_2614313	IPR000277::Cys/Met metabolism; pyridoxal phosphate-dependent enzyme::8	IPR015424::Pyridoxal phosphate-dependent transferase::8	IPR015421::Pyridoxal phosphate-dependent transferase; major domain::8	IPR015422::Pyridoxal phosphate-dependent transferase domain 1::8	IPR006235::O-acetylhomoserine/O-acetylserine sulfhydrylase::7						406	NCU01652_Neucr AN8277_cysD_Aspnid met17_pombe cysD_Aspnid YLR303W_MET17_Sacce1	Verified ORF Putative bifunctiol enzyme with a predicted role in methionine metabolism O-acetlylhomoserine (homocysteine synthase)		homocysteine synthase Met17	O-acetyl homoserine-O-acetyl serine sulfhydrylase; required for Methionine and cysteine biosynthesis
Cons_CM-specific	orbh_3706	0	1	2	2	4	2	4	2	2	8	7	0.875	-	Agabi_varbisH97_2_175891	Armosto1_255708	Auramp1_405584	Copci_AmutBmut1_357195		Mk_01274800	PleosPC15_2_1075464	Ptegra1_602905	Schco3_2567887	IPR036047::F-box-like domain superfamily::8										77
Cons_CM-specific	orbh_3730	0	1	2	2	2	2	4	4	2	8	7	0.875	-	Agabi_varbisH97_2_178101	Armosto1_269011	Auramp1_916	Copci_AmutBmut1_441975		Mk_01037500	PleosPC15_2_1097140	Ptegra1_612575	Schco3_2545875	IPR007484::Peptidase M28::8										285	BDBG_05051_blastomyces An18g03780_Aspnig BDCG_00606_blastomyces PMAA_024220_penmarneffei AN10522_Aspnid	Uncharacterized ORF Orthologs have fungal-type vacuole membrane localization	Protein of unknown function
Cons_CM-specific	orbh_4040	0	1	2	2	2	2	4	4	2	8	7	0.875	-	Agabi_varbisH97_2_191626	Armosto1_251054	Auramp1_472726	Copci_AmutBmut1_22949		Mk_01102700	PleosPC15_2_166414	Ptegra1_557299	Schco3_2631085											49
Cons_CM-specific	orbh_4126	0	1	4	2	2	2	2	2	4	8	7	0.875	-	Agabi_varbisH97_2_193750	Armosto1_271093	Auramp1_571169	Copci_AmutBmut1_356143		Mk_01398500	PleosPC15_2_169408	Ptegra1_604207	Schco3_2614728	IPR003958::Transcription factor CBF/NF-Y/archaeal histone domain::8	IPR009072::Histone-fold::8									50
Cons_CM-specific	orbh_4187	0	1	4	4	2	2	2	2	2	8	7	0.875	-	Agabi_varbisH97_2_195104	Armosto1_254581	Auramp1_496119	Copci_AmutBmut1_444698		Mk_01138500	PleosPC15_2_1059166	Ptegra1_650563	Schco3_2553229	IPR000504::R recognition motif domain::7	IPR035979::R-binding domain superfamily::7	IPR012677::Nucleotide-binding alpha-beta plait domain superfamily::6								77
Cons_CM-specific	orbh_4199	0	2	2	2	4	1	4	2	2	8	7	0.875	-	Agabi_varbisH97_2_195409	Armosto1_258237	Auramp1_437228	Copci_AmutBmut1_373008		Mk_01228600	PleosPC15_2_1010550	Ptegra1_558495	Schco3_2608117	IPR017907::Zinc finger; RING-type; conserved site::8	IPR002867::IBR domain::8	IPR044066::TRIAD supradomain::8	IPR013083::Zinc finger; RING/FYVE/PHD-type::8	IPR001841::Zinc finger; RING-type::7	IPR031127::E3 ubiquitin ligase RBR family::6	IPR027370::RING-type zinc-finger; LisH dimerisation motif::3	IPR000571::Zinc finger; CCCH-type::3	IPR035979::R-binding domain superfamily::2	IPR036855::Zinc finger; CCCH-type superfamily::2	66
Cons_CM-specific	orbh_4283	0	1	2	2	2	2	2	4	4	8	7	0.875	-	Agabi_varbisH97_2_200348	Armosto1_267016	Auramp1_516916	Copci_AmutBmut1_499867		Mk_01128900	PleosPC15_2_1091679	Ptegra1_558518	Schco3_2614432											89
Cons_CM-specific	orbh_4351	0	2	4	2	2	1	4	2	2	8	7	0.875	-	Agabi_varbisH97_2_206203	Armosto1_264774	Auramp1_488661	Copci_AmutBmut1_180729		Mk_01079300	PleosPC15_2_1066121	Ptegra1_501357	Schco3_2618677	IPR032675::Leucine-rich repeat domain superfamily::8	IPR001810::F-box domain::5	IPR036047::F-box-like domain superfamily::4								77
Cons_CM-specific	orbh_4361	0	2	4	2	1	2	2	2	4	8	7	0.875	-	Agabi_varbisH97_2_207100	Armosto1_270709	Auramp1_600297	Copci_AmutBmut1_216726		Mk_01396800	PleosPC15_2_1033726	Ptegra1_565681	Schco3_1123209	IPR029058::Alpha/Beta hydrolase fold::8	IPR000073::Alpha/beta hydrolase fold-1::5	IPR022742::Serine aminopeptidase; S33::2								338	NCU06927_Neucr AN3833_Aspnid	Uncharacterized ORF
Cons_CM-specific	orbh_4563	0	1	2	2	2	2	4	2	4	8	7	0.875	-	Agabi_varbisH97_2_58460	Armosto1_253894	Auramp1_579890	Copci_AmutBmut1_547048		Mk_00526900	PleosPC15_2_1098752	Ptegra1_228662	Schco3_2628948	IPR040855::ORC3; winged helix C-termil::8	IPR020795::Origin recognition complex; subunit 3::8									122	AN1435_Aspnid	Uncharacterized ORF Orthologs have D replication origin binding; chromatin binding activity
Cons_CM-specific	orbh_4941	0	2	2	4	2	2	4	2	1	8	7	0.875	-	Agabi_varbisH97_2_122950	Armosto1_270118	Auramp1_571086	Copci_AmutBmut1_50628		Mk_00224900	PleosPC15_2_1114685	Ptegra1_573106	Schco3_1200079											50
Cons_CM-specific	orbh_4975	0	1	4	2	2	2	4	2	2	8	7	0.875	-	Agabi_varbisH97_2_191371	Armosto1_251395	Auramp1_399678	Copci_AmutBmut1_462026		Mk_00361500	PleosPC15_2_1046808	Ptegra1_358805	Schco3_2668122	IPR036691::Endonuclease/exonuclease/phosphatase superfamily::8	IPR005135::Endonuclease/exonuclease/phosphatase::4									175	AN2637_Aspnid	Uncharacterized ORF
Cons_CM-specific	orbh_4978	0	2	4	4	2	2	2	1	2	8	7	0.875	-	Agabi_varbisH97_2_194202	Armosto1_266715	Auramp1_405018	Copci_AmutBmut1_365191		Mk_00438600	PleosPC15_2_1053184	Ptegra1_562691	Schco3_2606181	IPR013970::Replication factor A protein 3::8	IPR012340::Nucleic acid-binding; OB-fold::7									101
Cons_CM-specific	orbh_5110	0	2	2	4	2	1	4	2	2	8	7	0.875	-	Agabi_varbisH97_2_187264	Armosto1_257391	Auramp1_497978	Copci_AmutBmut1_464991		Mk_00632800	PleosPC15_2_1106826	Ptegra1_606823	Schco3_2694943											21
Cons_CM-specific	orbh_5149	0	2	4	4	2	1	2	2	2	8	7	0.875	-	Agabi_varbisH97_2_197456	Armosto1_268573	Auramp1_486870	Copci_AmutBmut1_464224		Mk_00825600	PleosPC15_2_155397	Ptegra1_600571	Schco3_2611109	IPR000182::GT domain::8	IPR016181::Acyl-CoA N-acyltransferase::8	IPR039949::N-alpha-acetyltransferase 40::8								218	NCU06037_Neucr
Cons_CM-specific	orbh_5631	0	2	0	2	2	2	4	2	4	7	7	1	-	Agabi_varbisH97_2_196042	Armosto1_252864	Auramp1_544088	Copci_AmutBmut1_471649		Mk_00610800		Ptegra1_376140	Schco3_2703782											1
Cons_CM-specific	orbh_5817	0	2	4	2	2	4	2	0	2	7	7	1	-		Armosto1_272128	Auramp1_493222	Copci_AmutBmut1_366366		Mk_00891100	PleosPC15_2_52019	Ptegra1_567043	Schco3_2615368	IPR036691::Endonuclease/exonuclease/phosphatase superfamily::7	IPR005135::Endonuclease/exonuclease/phosphatase::2									194	NCU09788_Neucr AN9156_Aspnid	Verified ORF
Cons_CM-specific	orbh_1554	1	2	1	2	2	2	2	2	4	9	7	0.875	-	Agabi_varbisH97_2_193288	Armosto1_265377	Auramp1_464364	Copci_AmutBmut1_428059	Cryne_JEC21_1_2907	Mk_00512100	PleosPC15_2_1023923	Ptegra1_547702	Schco3_2619536	IPR039667::Dolichyldiphosphatase; PAP2 domain::9	IPR039666::Dolichyldiphosphatase 1::9	IPR000326::Phosphatidic acid phosphatase type 2/haloperoxidase::9	IPR036938::Phosphatidic acid phosphatase type 2/haloperoxidase superfamily::9							363	YGR036C_CAX4_Sacce1 AN6610_Aspnid	Uncharacterized ORF Putative phosphatidylglycerol phosphate phosphatase with a predicted role in phospholipid metabolism			Dolichyl pyrophosphate (Dol-P-P) phosphatase; has a lumilly oriented active site in the ER; cleaves the anhydride linkage in Dol-P-P; required for Dol-P-P-linked oligosaccharide intermediate synthesis and protein N-glycosylation
Cons_CM-specific	orbh_170	1	2	4	2	1	2	2	2	2	9	7	0.875	-	Agabi_varbisH97_2_121482	Armosto1_271750	Auramp1_506232	Copci_AmutBmut1_398525	Cryne_JEC21_1_1498	Mk_01349400	PleosPC15_2_1048760	Ptegra1_576597	Schco3_2638741	IPR001163::LSM domain; eukaryotic/archaea-type::9	IPR010920::LSM domain superfamily::9	IPR017132::Sm-like protein Lsm7::8								398	YNL147W_LSM7_Sacce1 NCU01930_Neucr lsm7_pombe AN0767_Aspnid	Uncharacterized ORF Orthologs have R binding; poly(U) R binding activity and role in mR splicing; via spliceosome; maturation of SSU-rR; nuclear-transcribed mR catabolic process		Lsm2-8 complex Lsm7 (predicted)	Lsm (Like Sm) protein; part of heteroheptameric complexes (Lsm2p-7p and either Lsm1p or 8p): cytoplasmic Lsm1p complex involved in mR decay; nuclear Lsm8p complex part of U6 snRNP and possibly involved in processing tR; snoR; and rR; protein abundance increases and forms cytoplasmic foci in response to D replication stress
Cons_CM-specific	orbh_1966	1	1	4	2	2	2	2	2	2	9	7	0.875	-	Agabi_varbisH97_2_198669	Armosto1_252623	Auramp1_502270	Copci_AmutBmut1_523533	Cryne_JEC21_1_5364	Mk_01376100	PleosPC15_2_1087686	Ptegra1_602693	Schco3_1186489	IPR000232::Heat shock factor (HSF)-type; D-binding::9	IPR036390::Winged helix D-binding domain superfamily::9	IPR027718::Transcription factor Skn7::9	IPR027725::Heat shock transcription factor family::9	IPR036388::Winged helix-like D-binding domain superfamily::9	IPR001789::Sigl transduction response regulator; receiver domain::6	IPR011006::CheY-like superfamily::6				30
Cons_CM-specific	orbh_611	1	2	4	2	1	2	2	2	2	9	7	0.875	-	Agabi_varbisH97_2_180435	Armosto1_250770	Auramp1_565948	Copci_AmutBmut1_205801	Cryne_JEC21_1_6227	Mk_00252500	PleosPC15_2_48690	Ptegra1_611305	Schco3_2668731	IPR038763::DHH phosphoesterase superfamily::9	IPR001667::DDH domain::9	IPR004097::DHHA2 domain::9	IPR038222::DHHA2 domain superfamily::9							342	NCU06310_Neucr YHR201C_PPX1_Sacce1 SPAC2F3.11_pombe			exopolyphosphatase; prune Ppx1 (predicted)	Exopolyphosphatase; hydrolyzes inorganic polyphosphate (poly P) into Pi residues; located in the cytosol; plasma membrane; and mitochondrial matrix
Cons_CM-specific	orbh_3617	0	1	2	2	2	2	2	2	4	8	7	0.875	-	Agabi_varbisH97_2_134593	Armosto1_253037	Auramp1_491660	Copci_AmutBmut1_232408		Mk_00371500	PleosPC15_2_1047051	Ptegra1_570939	Schco3_2643028											7
Cons_CM-specific	orbh_3687	0	2	4	2	1	2	2	2	2	8	7	0.875	-	Agabi_varbisH97_2_151779	Armosto1_264660	Auramp1_488803	Copci_AmutBmut1_493447		Mk_00851100	PleosPC15_2_1066043	Ptegra1_528223	Schco3_2618835	IPR006073::GTP binding domain::8	IPR030393::EngB-type guanine nucleotide-binding (G) domain::8	IPR027417::P-loop containing nucleoside triphosphate hydrolase::8								174	YDR336W_YDR336W_Sacce1				Putative protein of unknown function; sumoylated under stress conditions in a genome wide study; YDR336W is not an essential gene
Cons_CM-specific	orbh_3951	0	2	2	4	2	1	2	2	2	8	7	0.875	-	Agabi_varbisH97_2_189720	Armosto1_268627	Auramp1_191259	Copci_AmutBmut1_63169		Mk_00831900	PleosPC15_2_1111438	Ptegra1_521950	Schco3_2609851	IPR001781::Zinc finger; LIM-type::7										88
Cons_CM-specific	orbh_4330	0	2	2	2	1	2	4	2	2	8	7	0.875	-	Agabi_varbisH97_2_203874	Armosto1_250068	Auramp1_390765	Copci_AmutBmut1_358934		Mk_00730400	PleosPC15_2_51257	Ptegra1_418562	Schco3_2633605	IPR032675::Leucine-rich repeat domain superfamily::4	IPR001810::F-box domain::3									58
Cons_CM-specific	orbh_4546	0	2	2	2	2	4	2	1	2	8	7	0.875	-	Agabi_varbisH97_2_227791	Armosto1_261422	Auramp1_481259	Copci_AmutBmut1_470305		Mk_00201600	PleosPC15_2_27674	Ptegra1_569214	Schco3_1185226	IPR008313::Metal-independent alpha-mannosidase::8	IPR008928::Six-hairpin glycosidase superfamily::8	IPR012341::Six-hairpin glycosidase-like superfamily::8								362	AN7307_Aspnid mug157_pombe NCU09737_Neucr	Verified ORF Has domains with predicted catalytic activity		alpha-mannosidase GH125 family Mug157 (predicted)
Cons_CM-specific	orbh_4596	0	1	2	2	2	2	2	4	2	8	7	0.875	-	Agabi_varbisH97_2_64829	Armosto1_258009	Auramp1_418405	Copci_AmutBmut1_473658		Mk_01203500	PleosPC15_2_1069433	Ptegra1_498070	Schco3_2607813											98						Spc33
Cons_CM-specific	orbh_5144	0	2	2	2	2	2	0	4	2	7	7	1	-	Agabi_varbisH97_2_176124		Auramp1_546699	Copci_AmutBmut1_357225		Mk_00814000	PleosPC15_2_1111594	Ptegra1_625561	Schco3_2163971											72
Cons_CM-specific	orbh_5280	0	0	2	4	2	2	2	2	2	7	7	1	-	Agabi_varbisH97_2_176407	Armosto1_255683	Auramp1_510726	Copci_AmutBmut1_442545		Mk_01225600	PleosPC15_2_1091285		Schco3_2743424	IPR015943::WD40/YVTN repeat-like-containing domain superfamily::7	IPR001680::WD40 repeat::6	IPR036322::WD40-repeat-containing domain superfamily::5								75
Cons_CM-specific	orbh_5635	0	2	2	2	2	2	2	0	4	7	7	1	-		Armosto1_253051	Auramp1_400540	Copci_AmutBmut1_378647		Mk_00347000	PleosPC15_2_1107382	Ptegra1_563735	Schco3_2693588	IPR029063::S-adenosyl-L-methionine-dependent methyltransferase::7	IPR041698::Methyltransferase domain 25::7									84
Cons_CM-specific	orbh_5652	0	2	2	4	2	2	2	0	2	7	7	1	-		Armosto1_253885	Auramp1_569973	Copci_AmutBmut1_462907		Mk_00716800	PleosPC15_2_1108297	Ptegra1_575652	Schco3_1331193											41
Cons_CM-specific	orbh_5846	0	2	2	2	2	2	4	0	2	7	7	1	-		Armosto1_268427	Auramp1_476550	Copci_AmutBmut1_196242		Mk_00402700	PleosPC15_2_1095820	Ptegra1_655293	Schco3_2633839	IPR036864::Zn(2)-C6 fungal-type D-binding domain superfamily::7	IPR001138::Zn(2)-C6 fungal-type D-binding domain::7									1
Cons_CM-specific	orbh_123	1	2	2	2	2	2	2	1	2	9	7	0.875	-	Agabi_varbisH97_2_118767	Armosto1_265448	Auramp1_204935	Copci_AmutBmut1_544999	Cryne_JEC21_1_4926	Mk_01094500	PleosPC15_2_1097239	Ptegra1_612336	Schco3_2619638	IPR013860::Nitrogen regulatory protein areA; GATA-like domain::9										40
Cons_CM-specific	orbh_3154	0	2	2	2	2	1	2	2	2	8	7	0.875	-	Agabi_varbisH97_2_182202	Armosto1_269641	Auramp1_405595	Copci_AmutBmut1_356997		Mk_01265600	PleosPC15_2_1036119	Ptegra1_521314	Schco3_2613127	IPR015324::Ribosomal protein Rsm22-like::8										270	NCU00599_Neucr
Cons_CM-specific	orbh_3961	0	2	2	2	1	2	2	2	2	8	7	0.875	-	Agabi_varbisH97_2_189887	Armosto1_268423	Auramp1_453763	Copci_AmutBmut1_414247		Mk_00814600	PleosPC15_2_1111600	Ptegra1_541270	Schco3_2566574	IPR007248::Mpv17/PMP22::8										378	wsc_Neucr	Verified ORF Putative plasma membrane sensor-transducer N- and O- glycosylated and localized in the cell wall and membrane		plasma membrane-associated serine-rich cell wall sensor Wsc1 (predicted)
Cons_CM-specific	orbh_4819	0	2	2	2	2	1	2	2	2	8	7	0.875	-	Agabi_varbisH97_2_135556	Armosto1_261689	Auramp1_581045	Copci_AmutBmut1_339618		Mk_00105800	PleosPC15_2_1103481	Ptegra1_569189	Schco3_2576192											17
Cons_CM-specific	orbh_4827	0	2	4	2	1	1	4	2	2	8	6	0.75	-	Agabi_varbisH97_2_135281	Armosto1_261861	Auramp1_109372	Copci_AmutBmut1_412433		Mk_00078700	PleosPC15_2_1112185	Ptegra1_229973	Schco3_2622724											163
Cons_CM-specific	orbh_3499	0	2	2	2	1	1	4	2	2	8	6	0.75	-	Agabi_varbisH97_2_115910	Armosto1_255562	Auramp1_491207	Copci_AmutBmut1_141512		Mk_00307200	PleosPC15_2_1047807	Ptegra1_24210	Schco3_1189931	IPR019826::Carboxylesterase type B; active site::8	IPR029058::Alpha/Beta hydrolase fold::8	IPR002018::Carboxylesterase; type B::8	IPR019819::Carboxylesterase type B; conserved site::6	IPR002168::Lipase; GDXG; putative histidine active site::2						263	NCU08752_Neucr
Cons_CM-specific	orbh_4271	0	1	4	2	2	2	2	1	2	8	6	0.75	-	Agabi_varbisH97_2_199282	Armosto1_258195	Auramp1_520467	Copci_AmutBmut1_492592		Mk_01196100	PleosPC15_2_1091524	Ptegra1_533331	Schco3_2560484	IPR019183::N-acetyltransferase B complex; non-catalytic subunit::8	IPR011990::Tetratricopeptide-like helical domain superfamily::8	IPR013026::Tetratricopeptide repeat-containing domain::2								209	AN4453_Aspnid	Uncharacterized ORF Orthologs have N-termil protein N-methyltransferase activity and role in mitotic actomyosin contractile ring assembly
Cons_CM-specific	orbh_6169	0	2	2	2	0	0	2	4	2	6	6	1	-	Agabi_varbisH97_2_205752	Armosto1_265226		Copci_AmutBmut1_497730		Mk_00894400	PleosPC15_2_1066015	Ptegra1_599992		IPR001563::Peptidase S10; serine carboxypeptidase::6	IPR018202::Serine carboxypeptidase; serine active site::6	IPR029058::Alpha/Beta hydrolase fold::6								225	NCU06720_Neucr AN2555_Aspnid	Uncharacterized ORF Orthologs have carboxypeptidase activity; serine-type carboxypeptidase activity
Cons_CM-specific	orbh_1275	1	1	4	2	2	1	4	2	4	9	6	0.75	-	Agabi_varbisH97_2_191077	Armosto1_257120	Auramp1_234120	Copci_AmutBmut1_519105	Cryne_JEC21_1_2157	Mk_00309800	PleosPC15_2_1078871	Ptegra1_658103	Schco3_2626638	IPR040662::Transcription factor Tfb2; C-termil domain::9	IPR004598::Transcription factor TFIIH subunit p52/Tfb2::9									421	NCU05523_Neucr AN7015_Aspnid tfb2_pombe YPL122C_TFB2_Sacce1	Uncharacterized ORF Has domains with predicted ATPase activator activity; role in nucleotide-excision repair and transcription factor TFIIH core complex localization		transcription factor TFIIH complex subunit Tfb2	Subunit of TFIIH and nucleotide excision repair factor 3 complexes; involved in transcription initiation; required for nucleotide excision repair; similar to 52 kDa subunit of human TFIIH
Cons_CM-specific	orbh_1729	1	1	4	2	2	1	4	4	2	9	6	0.75	-	Agabi_varbisH97_2_194802	Armosto1_253666	Auramp1_504366	Copci_AmutBmut1_402119	Cryne_JEC21_1_5901	Mk_00995500	PleosPC15_2_1091253	Ptegra1_510829	Schco3_2616310	IPR022673::Hexokise; C-termil::9	IPR022672::Hexokise; N-termil::9	IPR043129::ATPase; nucleotide binding domain::9	IPR019807::Hexokise; binding site::9	IPR001312::Hexokise::9						394	hxk1_pombe YGL253W_HXK2_Sacce1 HXK2_candida emp-1_Neucr hxkA_Aspnid	Verified ORF Putative hexokise with a predicted role in carbohydrate metabolism		hexokise 1	Hexokise isoenzyme 2; catalyzes phosphorylation of glucose in the cytosol; predomint hexokise during growth on glucose; functions in the nucleus to repress expression of HXK1 and GLK1 and to induce expression of its own gene; antiapoptotic; phosphorylation/dephosphorylation at serine-14 by protein kise Snf1p and protein phosphatase Glc7p-Reg1p regulates nucleocytoplasmic shuttling of Hxk2p; HXK2 …
Cons_CM-specific	orbh_1766	1	1	4	4	1	2	2	2	4	9	6	0.75	-	Agabi_varbisH97_2_195122	Armosto1_254271	Auramp1_479355	Copci_AmutBmut1_446631	Cryne_JEC21_1_1596	Mk_01094700	PleosPC15_2_1114184	Ptegra1_613004	Schco3_2621621	IPR005814::Aminotransferase class-III::9	IPR015422::Pyridoxal phosphate-dependent transferase domain 1::9	IPR010164::Ornithine aminotransferase::9	IPR015424::Pyridoxal phosphate-dependent transferase::9	IPR015421::Pyridoxal phosphate-dependent transferase; major domain::9						413	AN1810_otaA_Aspnid otaA_Aspnid YLR438W_CAR2_Sacce1 ota_Neucr car2_pombe	Verified ORF Ornithine transamise; involved in utilization of arginine as a proline source arginine-induced expression and activity subject to carbon-catabolite and nitrogen-metabolite repression regulated by CreA and AreA stress-induced protein		ornithine transamise Car2	L-ornithine transamise (OTAse); catalyzes the second step of arginine degradation; expression is dually-regulated by allophate induction and a specific arginine induction process; not nitrogen catabolite repression sensitive; protein abundance increases in response to D replication stress
Cons_CM-specific	orbh_2535	1	1	2	2	2	1	4	4	4	9	6	0.75	-	Agabi_varbisH97_2_221227	Armosto1_265262	Auramp1_398917	Copci_AmutBmut1_449121	Cryne_JEC21_1_2634	Mk_01085400	PleosPC15_2_1043136	Ptegra1_557007	Schco3_2496829	IPR009091::Regulator of chromosome condensation 1/beta-lactamase-inhibitor protein II::9	IPR000408::Regulator of chromosome condensation; RCC1::9	IPR036047::F-box-like domain superfamily::8	IPR001810::F-box domain::2							160
Cons_CM-specific	orbh_2596	1	1	2	2	1	2	4	4	4	9	6	0.75	-	Agabi_varbisH97_2_224327	Armosto1_270831	Auramp1_502503	Copci_AmutBmut1_518017	Cryne_JEC21_1_5525	Mk_00895800	PleosPC15_2_1066840	Ptegra1_546854	Schco3_2615184	IPR004136::Nitrote monooxygese::9	IPR013785::Aldolase-type TIM barrel::9									345	AN8801_Aspnid npd-2_Neucr	Uncharacterized ORF Orthologs have glyoxysome localization
Cons_CM-specific	orbh_2611	1	2	4	4	1	1	2	4	2	9	6	0.75	-	Agabi_varbisH97_2_225056	Armosto1_253071	Auramp1_547490	Copci_AmutBmut1_462719	Cryne_JEC21_1_984	Mk_00344200	PleosPC15_2_1078760	Ptegra1_602316	Schco3_2668332											385	NCU07738_Neucr AN11058_Aspnid	Uncharacterized ORF Orthologs have fungal biofilm matrix; intracellular localization
Cons_CM-specific	orbh_2665	1	2	4	4	1	2	4	1	2	9	6	0.75	-	Agabi_varbisH97_2_228355	Armosto1_254890	Auramp1_484420	Copci_AmutBmut1_408996	Cryne_JEC21_1_3173	Mk_00183400	PleosPC15_2_1050244	Ptegra1_598145	Schco3_2628525	IPR003660::HAMP domain::9	IPR036890::Histidine kise/HSP90-like ATPase superfamily::9	IPR003661::Sigl transduction histidine kise; dimerisation/phosphoacceptor domain::9	IPR036097::Sigl transduction histidine kise; dimerisation/phosphoacceptor domain superfamily::9	IPR001789::Sigl transduction response regulator; receiver domain::9	IPR003594::Histidine kise/HSP90-like ATPase::9	IPR004358::Sigl transduction histidine kise-related protein; C-termil::9	IPR005467::Histidine kise domain::9	IPR011006::CheY-like superfamily::9	IPR008979::Galactose-binding-like domain superfamily::2	391	NIK1_candida AN4479_nikA_Aspnid os-1_Neucr	Verified ORF Putative histidine-specific protein kise; part of a two-component sigl transduction phosphorelay system involved in response to fungicides mutant has a strong growth defect
Cons_CM-specific	orbh_737	1	1	4	2	1	2	2	4	4	9	6	0.75	-	Agabi_varbisH97_2_183659	Armosto1_267071	Auramp1_475078	Copci_AmutBmut1_437624	Cryne_JEC21_1_5201	Mk_01363200	PleosPC15_2_1103696	Ptegra1_558571	Schco3_2510691	IPR029056::Ribokise-like::9	IPR013749::Pyridoxamine kise/Phosphomethylpyrimidine kise::9	IPR016084::Haem oxygese-like; multi-helical::9	IPR004305::Thiamise-2/PQQC::9	IPR004399::Hydroxymethylpyrimidine kise/phosphomethylpyrimidine kise::9	IPR027574::Thiamise II::2					366	SPBP8B7.18c_pombe AN10762_Aspnid YOL055C_THI20_Sacce1	Verified ORF Has domains with predicted phosphomethylpyrimidine kise activity; thiamise activity and role in thiamine biosynthetic process		phosphomethylpyrimidine kise (predicted)	Trifunctiol enzyme of thiamine biosynthesis; degradation and salvage; has hydroxymethylpyrimidine (HMP) kise; HMP-phosphate (HMP-P) kise and thiamise activities; member of a gene family with THI21 and THI22; HMP and HMP-P kise activity redundant with Thi21p
Cons_CM-specific	orbh_911	1	1	2	1	2	4	4	2	4	9	6	0.75	-	Agabi_varbisH97_2_187099	Armosto1_251737	Auramp1_401054	Copci_AmutBmut1_432854	Cryne_JEC21_1_4077	Mk_00319400	PleosPC15_2_1053049	Ptegra1_529545	Schco3_2642967	IPR004776::Membrane transport protein::9										360	YBR287W_YBR287W_Sacce1 SPAC5D6.04_pombe NCU00589_Neucr AN0930_Aspnid	Uncharacterized ORF Has domains with predicted role in transmembrane transport and integral component of membrane localization		auxin family transmembrane transporter (predicted)	Protein of unknown function; green fluorescent protein (GFP)-fusion protein localizes to the ER; YBR287W is not an essential gene
Cons_CM-specific	orbh_4748	1	2	4	0	2	4	4	1	2	8	6	0.857143	-	Agabi_varbisH97_2_121294	Armosto1_253371	Auramp1_512538	Copci_AmutBmut1_369412	Cryne_JEC21_1_5297		PleosPC15_2_1047181	Ptegra1_565589	Schco3_2598675	IPR013218::Kinetochore-associated protein Dsn1/Mis13::8										82
Cons_CM-specific	orbh_4996	1	1	4	4	2	0	2	4	2	8	6	0.857143	-	Agabi_varbisH97_2_193433	Armosto1_264752	Auramp1_488615	Copci_AmutBmut1_220010	Cryne_JEC21_1_5018	Mk_00858500	PleosPC15_2_1066102	Ptegra1_604009		IPR000953::Chromo/chromo shadow domain::8	IPR023780::Chromo domain::8	IPR016197::Chromo-like domain superfamily::8	IPR008251::Chromo shadow domain::7							116	swi6_pombe			heterochromatin (HP1) family chromodomain protein Swi6
Cons_CM-specific	orbh_5128	1	2	4	0	4	1	2	2	4	8	6	0.857143	-	Agabi_varbisH97_2_194563	Armosto1_256276	Auramp1_574526	Copci_AmutBmut1_450312	Cryne_JEC21_1_3950		PleosPC15_2_1059813	Ptegra1_568618	Schco3_2637091	IPR024645::Mitochondrial export protein Som1::5										70
Cons_CM-specific	orbh_3258	0	1	4	2	2	1	4	4	2	8	6	0.75	-	Agabi_varbisH97_2_211452	Armosto1_262919	Auramp1_397012	Copci_AmutBmut1_353965		Mk_01485000	PleosPC15_2_1054660	Ptegra1_542833	Schco3_2629206	IPR029044::Nucleotide-diphospho-sugar transferases::8	IPR002685::Glycosyl transferase; family 15::8									350	YDR483W_KRE2_Sacce1 MNT2_candida NCU06541_Neucr AN2752_Aspnid	Uncharacterized ORF Orthologs have alpha-1;2-mannosyltransferase activity			Mannosyltransferase; involved in adding the 4th and 5th mannose residues of O-linked glycans
Cons_CM-specific	orbh_3453	0	2	2	4	2	1	4	1	4	8	6	0.75	-	Agabi_varbisH97_2_190957	Armosto1_262045	Auramp1_479830	Copci_AmutBmut1_502116		Mk_00091000	PleosPC15_2_173501	Ptegra1_594282	Schco3_1113856	IPR014811::Argoute; linker 1 domain::8	IPR003165::Piwi domain::8	IPR036085::PAZ domain superfamily::8	IPR032474::Protein argoute; N-termil::8	IPR012337::Ribonuclease H-like superfamily::8	IPR036397::Ribonuclease H superfamily::8	IPR003100::PAZ domain::7	IPR032472::Argoute linker 2 domain::7	IPR032473::Protein argoute; Mid domain::7		210	ago1_pombe			argoute
Cons_CM-specific	orbh_3508	0	2	4	2	1	1	2	4	4	8	6	0.75	-	Agabi_varbisH97_2_116501	Armosto1_253016	Auramp1_491413	Copci_AmutBmut1_224523		Mk_00378700	PleosPC15_2_1025243	Ptegra1_613353	Schco3_2627369	IPR036638::Helix-loop-helix D-binding domain superfamily::8	IPR011598::Myc-type; basic helix-loop-helix (bHLH) domain::7									16
Cons_CM-specific	orbh_3560	0	4	4	1	2	2	4	1	2	8	6	0.75	-	Agabi_varbisH97_2_120641	Armosto1_263268	Auramp1_514861	Copci_AmutBmut1_364950		Mk_01045700	PleosPC15_2_1114577	Ptegra1_568750	Schco3_2637164	IPR013087::Zinc finger C2H2-type::7	IPR017907::Zinc finger; RING-type; conserved site::5	IPR001841::Zinc finger; RING-type::5	IPR013083::Zinc finger; RING/FYVE/PHD-type::5	IPR018957::Zinc finger; C3HC4 RING-type::3	IPR036236::Zinc finger C2H2 superfamily::2					11
Cons_CM-specific	orbh_3564	0	1	2	4	1	2	4	2	4	8	6	0.75	-	Agabi_varbisH97_2_121121	Armosto1_253456	Auramp1_546066	Copci_AmutBmut1_496348		Mk_01356200	PleosPC15_2_1098960	Ptegra1_503194	Schco3_2668517											24
Cons_CM-specific	orbh_3571	0	2	4	4	1	1	4	2	2	8	6	0.75	-	Agabi_varbisH97_2_121841	Armosto1_254305	Auramp1_569136	Copci_AmutBmut1_543308		Mk_01153800	PleosPC15_2_1059069	Ptegra1_594435	Schco3_2515308	IPR039355::Transcription factor GATA::8	IPR013088::Zinc finger; NHR/GATA-type::8	IPR000679::Zinc finger; GATA-type::8	IPR013860::Nitrogen regulatory protein areA; GATA-like domain::7							102
Cons_CM-specific	orbh_3579	0	2	2	4	1	1	4	2	4	8	6	0.75	-	Agabi_varbisH97_2_122355	Armosto1_263039	Auramp1_534902	Copci_AmutBmut1_492516		Mk_00197300	PleosPC15_2_163788	Ptegra1_585205	Schco3_2702236	IPR001356::Homeobox domain::8	IPR009057::Homeobox-like domain superfamily::8									59
Cons_CM-specific	orbh_3588	0	1	4	2	4	1	2	2	4	8	6	0.75	-	Agabi_varbisH97_2_122838	Armosto1_262583	Auramp1_100131	Copci_AmutBmut1_445307		Mk_00517200	PleosPC15_2_1103885	Ptegra1_560169	Schco3_2498322	IPR029319::D ligase; OB-like domain::8	IPR012340::Nucleic acid-binding; OB-fold::8	IPR007527::Zinc finger; SWIM-type::7	IPR012310::D ligase; ATP-dependent; central::7	IPR016059::D ligase; ATP-dependent; conserved site::7						80
Cons_CM-specific	orbh_3631	0	2	2	4	2	1	1	4	4	8	6	0.75	-	Agabi_varbisH97_2_136356	Armosto1_252695	Auramp1_472122	Copci_AmutBmut1_418139		Mk_01073500	PleosPC15_2_28197	Ptegra1_510921	Schco3_2507299	IPR015867::Nitrogen regulatory protein PII/ATP phosphoribosyltransferase; C-termil::8	IPR036069::GTP cyclohydrolase 1 type 2/Nif3 superfamily::8									232	AN11154_Aspnid NCU04913_Neucr	Uncharacterized ORF
Cons_CM-specific	orbh_3640	0	1	4	2	2	1	2	4	4	8	6	0.75	-	Agabi_varbisH97_2_137086	Armosto1_270880	Auramp1_504143	Copci_AmutBmut1_365298		Mk_00915000	PleosPC15_2_1034714	Ptegra1_425947	Schco3_2616132	IPR007905::Emopamil-binding protein::8	IPR033118::EXPERA domain::8									322	NCU03752_Neucr AN9496_Aspnid	Uncharacterized ORF Has domains with predicted cholestenol delta-isomerase activity; role in sterol metabolic process and endoplasmic reticulum; integral component of membrane localization
Cons_CM-specific	orbh_3729	0	1	2	4	4	1	2	2	4	8	6	0.75	-	Agabi_varbisH97_2_177982	Armosto1_261073	Auramp1_120808	Copci_AmutBmut1_443456		Mk_00033500	PleosPC15_2_156607	Ptegra1_603299	Schco3_2619674	IPR001128::Cytochrome P450::8	IPR017972::Cytochrome P450; conserved site::8	IPR002401::Cytochrome P450; E-class; group I::8	IPR036396::Cytochrome P450 superfamily::8							61	AN7131_CYP52H1_Aspnid	Uncharacterized ORF Putative cytochrome P450
Cons_CM-specific	orbh_3778	0	2	4	4	1	2	4	2	1	8	6	0.75	-	Agabi_varbisH97_2_181221	Armosto1_262286	Auramp1_394773	Copci_AmutBmut1_496541		Mk_00120000	PleosPC15_2_167515	Ptegra1_601157	Schco3_2599095											50
Cons_CM-specific	orbh_3861	0	1	4	4	1	2	2	2	4	8	6	0.75	-	Agabi_varbisH97_2_185622	Armosto1_269825	Auramp1_493394	Copci_AmutBmut1_49522		Mk_00245300	PleosPC15_2_167791	Ptegra1_603228	Schco3_2532925	IPR041260::Sld7 C-termil domain::3										99
Cons_CM-specific	orbh_3880	0	1	4	2	2	1	2	4	4	8	6	0.75	-	Agabi_varbisH97_2_186749	Armosto1_257579	Auramp1_520882	Copci_AmutBmut1_463668		Mk_01463900	PleosPC15_2_1066758	Ptegra1_615184	Schco3_73881	IPR020845::AMP-binding; conserved site::8	IPR025110::AMP-binding enzyme; C-termil domain::8	IPR000873::AMP-dependent synthetase/ligase::8	IPR042099::AMP-dependent synthetase-like superfamily::4							124
Cons_CM-specific	orbh_3930	0	1	4	4	2	2	4	1	2	8	6	0.75	-	Agabi_varbisH97_2_189363	Armosto1_269539	Auramp1_486224	Copci_AmutBmut1_494056		Mk_01291600	PleosPC15_2_155700	Ptegra1_570627	Schco3_2610404	IPR009077::Proteasome activator PA28::8	IPR036252::Proteasome activator superfamily::8	IPR036997::Proteasome activator PA28; C-termil domain superfamily::8	IPR003186::Proteasome activator PA28; C-termil domain::8	IPR003185::Proteasome activator PA28; N-termil domain::5	IPR036996::Proteasome activator PA28; N-termil domain superfamily::2					110
Cons_CM-specific	orbh_3940	0	1	4	2	1	2	4	2	4	8	6	0.75	-	Agabi_varbisH97_2_189483	Armosto1_269581	Auramp1_570722	Copci_AmutBmut1_387830		Mk_01259700	PleosPC15_2_1054346	Ptegra1_609879	Schco3_2567539	IPR018523::Isocitrate lyase/phosphorylmutase; conserved site::8	IPR040442::Pyruvate kise-like domain superfamily::8	IPR039556::ICL/PEPM domain::8	IPR006254::Isocitrate lyase::8	IPR015813::Pyruvate/Phosphoenolpyruvate kise-like domain superfamily::8						333	mclA_Aspnid YPR006C_ICL2_Sacce1 NCU02481_Neucr	Verified ORF Methylisocitrate lyase predicted role in the glyoxylate shunt mitochondrial localization sigl predicted			2-methylisocitrate lyase of the mitochondrial matrix; functions in the methylcitrate cycle to catalyze the conversion of 2-methylisocitrate to succite and pyruvate; ICL2 transcription is repressed by glucose and induced by ethanol
Cons_CM-specific	orbh_3966	0	2	4	1	4	1	4	2	2	8	6	0.75	-	Agabi_varbisH97_2_189956	Armosto1_268891	Auramp1_535230	Copci_AmutBmut1_233439		Mk_00801800	PleosPC15_2_1092134	Ptegra1_552438	Schco3_2662585	IPR004813::Oligopeptide transporter; OPT superfamily::8	IPR004648::Tetrapeptide transporter; OPT1/isp4::8									91
Cons_CM-specific	orbh_3981	0	1	4	1	4	2	2	2	4	8	6	0.75	-	Agabi_varbisH97_2_190373	Armosto1_258121	Auramp1_498068	Copci_AmutBmut1_360650		Mk_01213900	PleosPC15_2_1095440	Ptegra1_520249	Schco3_2481697	IPR036691::Endonuclease/exonuclease/phosphatase superfamily::8	IPR004808::AP endonuclease 1::8	IPR005135::Endonuclease/exonuclease/phosphatase::8	IPR020848::AP endonuclease 1; conserved site::2							157
Cons_CM-specific	orbh_3993	0	2	4	4	1	1	2	2	4	8	6	0.75	-	Agabi_varbisH97_2_190649	Armosto1_266738	Auramp1_508209	Copci_AmutBmut1_417650		Mk_01070000	PleosPC15_2_1087934	Ptegra1_497155	Schco3_2607107	IPR000608::Ubiquitin-conjugating enzyme E2::8	IPR016135::Ubiquitin-conjugating enzyme/RWD-like::8	IPR023313::Ubiquitin-conjugating enzyme; active site::4								341	YOR339C_UBC11_Sacce1 NCU08345_Neucr ubc11_pombe			ubiquitin conjugating enzyme E2; Ubc11/UbcP4	Ubiquitin-conjugating enzyme; most similar in sequence to Xenopus ubiquitin-conjugating enzyme E2-C; but not a true functiol homolog of this E2; unlike E2-C; not required for the degradation of mitotic cyclin Clb2
Cons_CM-specific	orbh_4021	0	1	4	4	2	1	2	2	4	8	6	0.75	-	Agabi_varbisH97_2_191328	Armosto1_252960	Auramp1_400336	Copci_AmutBmut1_485224		Mk_00370200	PleosPC15_2_41112	Ptegra1_353362	Schco3_2502848	IPR007219::Transcription factor domain; fungi::8	IPR036864::Zn(2)-C6 fungal-type D-binding domain superfamily::6	IPR001138::Zn(2)-C6 fungal-type D-binding domain::5								84
Cons_CM-specific	orbh_4027	0	1	4	4	1	2	2	4	2	8	6	0.75	-	Agabi_varbisH97_2_191430	Armosto1_253224	Auramp1_429979	Copci_AmutBmut1_229833		Mk_00379400	PleosPC15_2_1113751	Ptegra1_510502	Schco3_2627472	IPR011025::G protein alpha subunit; helical insertion::8	IPR001019::Guanine nucleotide binding protein (G-protein); alpha subunit::8	IPR027417::P-loop containing nucleoside triphosphate hydrolase::8								90
Cons_CM-specific	orbh_4066	0	2	2	2	1	1	4	4	4	8	6	0.75	-	Agabi_varbisH97_2_192336	Armosto1_270901	Auramp1_26403	Copci_AmutBmut1_438642		Mk_01491400	PleosPC15_2_1041927	Ptegra1_558006	Schco3_2510775	IPR003781::CoA-binding::8	IPR036291::D(P)-binding domain superfamily::8									359	AN12050_Aspnid NCU06615_Neucr	Uncharacterized ORF Has domains with predicted cofactor binding activity
Cons_CM-specific	orbh_4160	0	1	4	4	1	2	2	2	4	8	6	0.75	-	Agabi_varbisH97_2_194565	Armosto1_256277	Auramp1_411992	Copci_AmutBmut1_498332		Mk_00601300	PleosPC15_2_1090916	Ptegra1_604953	Schco3_2637094											59
Cons_CM-specific	orbh_4210	0	1	2	4	1	2	4	4	2	8	6	0.75	-	Agabi_varbisH97_2_195620	Armosto1_269735	Auramp1_3931	Copci_AmutBmut1_70251		Mk_01409000	PleosPC15_2_36899	Ptegra1_594326	Schco3_2626705	IPR029058::Alpha/Beta hydrolase fold::8	IPR000073::Alpha/beta hydrolase fold-1::6									60
Cons_CM-specific	orbh_4225	0	1	2	4	4	2	2	1	4	8	6	0.75	-	Agabi_varbisH97_2_196029	Armosto1_254269	Auramp1_188302	Copci_AmutBmut1_170057		Mk_01396700	PleosPC15_2_1064650	Ptegra1_586942	Schco3_2620364	IPR014851::BCS1; N-termil::8	IPR027417::P-loop containing nucleoside triphosphate hydrolase::8	IPR003593::AAA+ ATPase domain::8	IPR003959::ATPase; AAA-type; core::8	IPR003960::ATPase; AAA-type; conserved site::8						71
Cons_CM-specific	orbh_4300	0	4	2	1	2	1	2	4	4	8	6	0.75	-	Agabi_varbisH97_2_201865	Armosto1_253156	Auramp1_232161	Copci_AmutBmut1_11944		Mk_00361300	PleosPC15_2_33997	Ptegra1_563486	Schco3_1153136	IPR036259::MFS transporter superfamily::8	IPR020846::Major facilitator superfamily domain::8	IPR005828::Major facilitator; sugar transporter-like::8	IPR005829::Sugar transporter; conserved site::6	IPR003663::Sugar/inositol transporter::3						93	AN8112_Aspnid	Uncharacterized ORF Predicted ransmembrane transporter predicted secondary metabolism gene cluster member
Cons_CM-specific	orbh_4327	0	1	1	4	2	2	4	2	4	8	6	0.75	-	Agabi_varbisH97_2_203512	Armosto1_261044	Auramp1_394244	Copci_AmutBmut1_242843		Mk_00301000	PleosPC15_2_1017034	Ptegra1_650534	Schco3_2673902											78
Cons_CM-specific	orbh_4340	0	2	2	1	4	4	4	2	1	8	6	0.75	-	Agabi_varbisH97_2_204879	Armosto1_257804	Auramp1_543984	Copci_AmutBmut1_355588		Mk_01185400	PleosPC15_2_1104852	Ptegra1_604110	Schco3_1155753											99
Cons_CM-specific	orbh_4389	0	1	4	1	2	4	4	2	2	8	6	0.75	-	Agabi_varbisH97_2_209647	Armosto1_253904	Auramp1_560288	Copci_AmutBmut1_220943		Mk_01211300	PleosPC15_2_1087579	Ptegra1_603441	Schco3_2661304	IPR029058::Alpha/Beta hydrolase fold::8	IPR000073::Alpha/beta hydrolase fold-1::6									322	NCU03925_Neucr AN3661_Aspnid	Uncharacterized ORF
Cons_CM-specific	orbh_4706	0	2	4	2	1	1	4	4	2	8	6	0.75	-	Agabi_varbisH97_2_192278	Armosto1_250400	Auramp1_474547	Copci_AmutBmut1_494451		Mk_00875200	PleosPC15_2_1093371	Ptegra1_573343	Schco3_2632766	IPR004134::Peptidase C1B; bleomycin hydrolase::7	IPR038765::Papain-like cysteine peptidase superfamily::7	IPR000169::Cysteine peptidase; cysteine active site::7								361	NCU08333_Neucr YNL239W_LAP3_Sacce1				Cysteine aminopeptidase with homocysteine-thiolactose activity; protects cells against homocysteine toxicity; has bleomycin hydrolase activity in vitro; transcription is regulated by galactose via Gal4p; orthologous to human BLMH
Cons_CM-specific	orbh_4718	0	2	4	1	4	2	4	1	2	8	6	0.75	-	Agabi_varbisH97_2_75778	Armosto1_250683	Auramp1_563737	Copci_AmutBmut1_474286		Mk_00650500	PleosPC15_2_1071430	Ptegra1_319951	Schco3_2703911											67
Cons_CM-specific	orbh_4801	0	2	4	4	1	2	4	1	2	8	6	0.75	-	Agabi_varbisH97_2_122844	Armosto1_258394	Auramp1_79591	Copci_AmutBmut1_375678		Mk_01065600	PleosPC15_2_1101454	Ptegra1_581293	Schco3_2697289											2
Cons_CM-specific	orbh_4858	0	2	4	4	1	1	2	2	4	8	6	0.75	-	Agabi_varbisH97_2_119628	Armosto1_264959	Auramp1_489453	Copci_AmutBmut1_434085		Mk_00048800	PleosPC15_2_1077797	Ptegra1_164273	Schco3_2626981	IPR008011::Complex 1 LYR protein::3										103
Cons_CM-specific	orbh_4931	0	2	4	2	1	1	4	2	4	8	6	0.75	-	Agabi_varbisH97_2_114324	Armosto1_269573	Auramp1_485458	Copci_AmutBmut1_268542		Mk_00771000	PleosPC15_2_1088355	Ptegra1_391552	Schco3_2564327	IPR036533::BAG domain superfamily::6	IPR003103::BAG domain::5									2
Cons_CM-specific	orbh_4990	0	1	4	2	2	1	4	2	4	8	6	0.75	-	Agabi_varbisH97_2_117181	Armosto1_261730	Auramp1_479474	Copci_AmutBmut1_537729		Mk_00082900	PleosPC15_2_1082235	Ptegra1_560925	Schco3_2538453	IPR018574::Structure-specific endonuclease subunit Slx4::4										10
Cons_CM-specific	orbh_5038	0	2	2	4	2	1	1	4	4	8	6	0.75	-	Agabi_varbisH97_2_188439	Armosto1_249959	Auramp1_573030	Copci_AmutBmut1_353834		Mk_00865100	PleosPC15_2_1097646	Ptegra1_653259	Schco3_2631639											86
Cons_CM-specific	orbh_5075	0	1	4	1	2	2	4	2	4	8	6	0.75	-	Agabi_varbisH97_2_121282	Armosto1_253879	Auramp1_396841	Copci_AmutBmut1_500297		Mk_00257200	PleosPC15_2_48706	Ptegra1_584293	Schco3_2600398	IPR003034::SAP domain::3	IPR004837::Sodium/calcium exchanger membrane region::1	IPR036361::SAP domain superfamily::1								77
Cons_CM-specific	orbh_5105	0	2	4	4	1	1	4	2	2	8	6	0.75	-	Agabi_varbisH97_2_65482	Armosto1_252992	Auramp1_491072	Copci_AmutBmut1_367512		Mk_00354200	PleosPC15_2_1090474	Ptegra1_654409	Schco3_2627047											67
Cons_CM-specific	orbh_5175	0	2	2	1	2	4	4	4	1	8	6	0.75	-	Agabi_varbisH97_2_134390	Armosto1_252185	Auramp1_474563	Copci_AmutBmut1_501338		Mk_00371200	PleosPC15_2_152846	Ptegra1_564011	Schco3_1202933											22
Cons_CM-specific	orbh_5917	1	2	4	0	2	2	4	0	4	7	6	1	-		Armosto1_266967	Auramp1_498095	Copci_AmutBmut1_500213	Cryne_JEC21_1_762		PleosPC15_2_1030860	Ptegra1_588159	Schco3_2743231	IPR007648::Mitochondrial ATPase inhibitor::3										80
Cons_CM-specific	orbh_5060	0	2	4	0	1	4	2	2	4	7	6	0.857143	-	Agabi_varbisH97_2_207546	Armosto1_264766	Auramp1_458803	Copci_AmutBmut1_445371			PleosPC15_2_1114616	Ptegra1_567528	Schco3_2641189	IPR002347::Short-chain dehydrogese/reductase SDR::7	IPR036291::D(P)-binding domain superfamily::7	IPR020904::Short-chain dehydrogese/reductase; conserved site::4								305	tnr-1_Neucr
Cons_CM-specific	orbh_5387	0	1	4	0	2	2	2	4	4	7	6	0.857143	-	Agabi_varbisH97_2_191880	Armosto1_261940	Auramp1_479192	Copci_AmutBmut1_412193			PleosPC15_2_1038360	Ptegra1_561018	Schco3_2621386											82
Cons_CM-specific	orbh_5439	0	4	0	2	1	2	4	2	4	7	6	0.857143	-	Agabi_varbisH97_2_194899	Armosto1_254052	Auramp1_565896	Copci_AmutBmut1_477317		Mk_00068100		Ptegra1_590769	Schco3_2319632											24
Cons_CM-specific	orbh_5456	0	2	2	4	2	0	4	1	4	7	6	0.857143	-	Agabi_varbisH97_2_195932	Armosto1_254851	Auramp1_607495	Copci_AmutBmut1_541839		Mk_00616300	PleosPC15_2_1090758	Ptegra1_582555		IPR029052::Metallo-dependent phosphatase-like::6	IPR004843::Calcineurin-like phosphoesterase domain; ApaH type::6									221	NCU04532_Neucr
Cons_CM-specific	orbh_5487	0	2	4	0	2	1	4	2	4	7	6	0.857143	-	Agabi_varbisH97_2_203185	Armosto1_261793	Auramp1_105388	Copci_AmutBmut1_155160			PleosPC15_2_1089092	Ptegra1_238180	Schco3_2464042											46
Cons_CM-specific	orbh_5527	0	1	0	4	2	2	4	2	4	7	6	0.857143	-	Agabi_varbisH97_2_211233	Armosto1_253476	Auramp1_575987	Copci_AmutBmut1_467632		Mk_00011800		Ptegra1_589642	Schco3_2605152	IPR011333::SKP1/BTB/POZ domain superfamily::3	IPR000210::BTB/POZ domain::2									57
Cons_CM-specific	orbh_5561	0	0	2	4	1	2	4	4	2	7	6	0.857143	-	Agabi_varbisH97_2_228607	Armosto1_262867	Auramp1_483579	Copci_AmutBmut1_392538		Mk_00183600	PleosPC15_2_1073003		Schco3_2629579											252	NCU07661_Neucr AN5339_Aspnid	Uncharacterized ORF
Cons_CM-specific	orbh_5619	0	0	4	4	2	1	2	2	4	7	6	0.857143	-	Agabi_varbisH97_2_178427	Armosto1_250606	Auramp1_544508	Copci_AmutBmut1_452701		Mk_01426300	PleosPC15_2_1093490		Schco3_2634497	IPR013087::Zinc finger C2H2-type::1										41
Cons_CM-specific	orbh_5623	0	2	0	2	1	2	4	4	4	7	6	0.857143	-	Agabi_varbisH97_2_204931	Armosto1_250970	Auramp1_421118	Copci_AmutBmut1_457790		Mk_01425100		Ptegra1_587676	Schco3_2631368											27
Cons_CM-specific	orbh_5678	0	4	1	2	2	2	4	0	4	7	6	0.857143	-		Armosto1_257905	Auramp1_405068	Copci_AmutBmut1_492692		Mk_01193500	PleosPC15_2_1080534	Ptegra1_536949	Schco3_2682737	IPR009571::Membrane protein SUR7/Rim9-like; fungi::7										126	NCU01357_Neucr
Cons_CM-specific	orbh_5738	0	2	4	2	2	1	4	0	4	7	6	0.857143	-		Armosto1_264308	Auramp1_577445	Copci_AmutBmut1_151514		Mk_00239700	PleosPC15_2_1082766	Ptegra1_613349	Schco3_2660819	IPR032675::Leucine-rich repeat domain superfamily::1										67
Cons_CM-specific	orbh_5902	0	1	4	0	2	2	4	4	2	7	6	0.857143	-	Agabi_varbisH97_2_116196	Armosto1_257694	Auramp1_489813	Copci_AmutBmut1_437196			PleosPC15_2_1090334	Ptegra1_544844	Schco3_2626612											80
Cons_CM-specific	orbh_5909	0	2	1	0	2	2	4	4	4	7	6	0.857143	-	Agabi_varbisH97_2_42628	Armosto1_264229	Auramp1_404813	Copci_AmutBmut1_470790			PleosPC15_2_1090697	Ptegra1_216007	Schco3_2614017	IPR032675::Leucine-rich repeat domain superfamily::7										55
Cons_CM-specific	orbh_5914	0	1	4	2	0	2	4	2	4	7	6	0.857143	-	Agabi_varbisH97_2_228312	Armosto1_255321		Copci_AmutBmut1_498221		Mk_00977400	PleosPC15_2_1024822	Ptegra1_503666	Schco3_2607735	IPR001810::F-box domain::7	IPR032675::Leucine-rich repeat domain superfamily::5	IPR036047::F-box-like domain superfamily::3								63
Cons_CM-specific	orbh_5941	0	2	4	4	2	1	2	0	4	7	6	0.857143	-		Armosto1_266824	Auramp1_498136	Copci_AmutBmut1_495272		Mk_01060000	PleosPC15_2_21640	Ptegra1_561041	Schco3_2607400	IPR012337::Ribonuclease H-like superfamily::7	IPR003165::Piwi domain::7	IPR014811::Argoute; linker 1 domain::7	IPR036085::PAZ domain superfamily::7	IPR036397::Ribonuclease H superfamily::7	IPR003100::PAZ domain::6	IPR032473::Protein argoute; Mid domain::6	IPR032474::Protein argoute; N-termil::5	IPR032472::Argoute linker 2 domain::2		12
Cons_CM-specific	orbh_6024	0	0	0	4	4	2	4	2	2	6	6	1	-	Agabi_varbisH97_2_116000	Armosto1_257386	Auramp1_627671	Copci_AmutBmut1_141215		Mk_00318100			Schco3_2743904											3
Cons_CM-specific	orbh_6172	0	2	0	0	4	2	4	2	4	6	6	1	-	Agabi_varbisH97_2_207467	Armosto1_271255	Auramp1_504625	Copci_AmutBmut1_444168				Ptegra1_505979	Schco3_2616528	IPR018712::Domain of unknown function DUF2235::6	IPR029058::Alpha/Beta hydrolase fold::3									171
Cons_CM-specific	orbh_6245	0	2	4	0	2	0	4	4	2	6	6	1	-	Agabi_varbisH97_2_194253	Armosto1_251417	Auramp1_402132	Copci_AmutBmut1_350887			PleosPC15_2_165348	Ptegra1_65136												28
Cons_CM-specific	orbh_6491	0	2	4	0	2	2	4	0	4	6	6	1	-		Armosto1_257883	Auramp1_548983	Copci_AmutBmut1_456027			PleosPC15_2_1087699	Ptegra1_587605	Schco3_2695106											48
Cons_CM-specific	orbh_6521	0	0	4	4	2	4	2	0	2	6	6	1	-		Armosto1_254818	Auramp1_59521	Copci_AmutBmut1_450491		Mk_00458200	PleosPC15_2_158828		Schco3_2691830											4
Cons_CM-specific	orbh_6546	0	2	2	0	0	4	4	4	2	6	6	1	-	Agabi_varbisH97_2_194043	Armosto1_271298		Copci_AmutBmut1_498312			PleosPC15_2_155017	Ptegra1_502392	Schco3_2665552	IPR036028::SH3-like domain superfamily::5										1
Cons_CM-specific	orbh_1179	1	1	4	2	1	2	4	2	2	9	6	0.75	-	Agabi_varbisH97_2_190340	Armosto1_258151	Auramp1_548485	Copci_AmutBmut1_360491	Cryne_JEC21_1_2558	Mk_01222400	PleosPC15_2_1021616	Ptegra1_496809	Schco3_2661242	IPR023170::Helix-turn-helix; base-excision D repair; C-termil::9	IPR011257::D glycosylase::9	IPR003265::HhH-GPD domain::8	IPR012904::8-oxoguanine D glycosylase; N-termil::8							407	YML060W_OGG1_Sacce1 NCU03040_Neucr AN6682_Aspnid	Uncharacterized ORF Orthologs have oxidized purine nucleobase lesion D N-glycosylase activity and role in D repair; base-excision repair; AP site formation; error-free translesion synthesis; telomere maintence via telomerase			Nuclear and mitochondrial glycosylase/lyase; specifically excises 7;8-dihydro-8-oxoguanine residues located opposite cytosine or thymine residues in D; repairs oxidative damage to mitochondrial D; contributes to UVA resistance
Cons_CM-specific	orbh_1506	1	2	4	4	1	1	2	2	2	9	6	0.75	-	Agabi_varbisH97_2_192763	Armosto1_250877	Auramp1_543994	Copci_AmutBmut1_446282	Cryne_JEC21_1_2862	Mk_00677900	PleosPC15_2_1066914	Ptegra1_557400	Schco3_2631473	IPR003377::Cornichon::9	IPR033466::Cornichon; conserved site::9									391	NCU06922_Neucr YGL054C_ERV14_Sacce1 erv14_pombe AN5195_Aspnid	Uncharacterized ORF Orthologs have cargo receptor activity and role in ascospore formation; axial cellular bud site selection; endoplasmic reticulum to Golgi vesicle-mediated transport		cornichon family protein Erv14 (predicted)	COPII-coated vesicle protein; involved in vesicle formation and incorporation of specific secretory cargo; required for the delivery of bud-site selection protein Axl2p to cell surface; related to Drosophila cornichon; ERV14 has a paralog; ERV15; that arose from the whole genome duplication
Cons_CM-specific	orbh_1518	1	1	2	4	1	2	4	2	2	9	6	0.75	-	Agabi_varbisH97_2_192879	Armosto1_251104	Auramp1_446520	Copci_AmutBmut1_462297	Cryne_JEC21_1_3542	Mk_01184500	PleosPC15_2_1093608	Ptegra1_564988	Schco3_2508697	IPR011547::SLC26A/SulP transporter domain::9	IPR002645::STAS domain::9	IPR001902::SLC26A/SulP transporter::9	IPR036513::STAS domain superfamily::9							405	AN3157_Aspnid SPCC320.05_pombe YPR003C_YPR003C_Sacce1 NCU09642_Neucr	Uncharacterized ORF Has domains with predicted sulfate transmembrane transporter activity; role in sulfate transport and integral component of membrane localization		sulfate transmembrane transporter (predicted)	Putative sulfate permease; physically interacts with Hsp82p; green fluorescent protein (GFP)-fusion protein localizes to the ER; YPR003C is not an essential gene
Cons_CM-specific	orbh_1569	1	2	4	2	1	1	4	2	2	9	6	0.75	-	Agabi_varbisH97_2_193373	Armosto1_265087	Auramp1_546763	Copci_AmutBmut1_354663	Cryne_JEC21_1_2169	Mk_01072500	PleosPC15_2_1113293	Ptegra1_43624	Schco3_2618046	IPR011990::Tetratricopeptide-like helical domain superfamily::9	IPR019734::Tetratricopeptide repeat::9	IPR013026::Tetratricopeptide repeat-containing domain::9	IPR001440::Tetratricopeptide repeat 1::2	IPR037919::UDP-N-acetylglucosamine--peptide N-acetylglucosaminyltransferase 110kDa subunit::2						146
Cons_CM-specific	orbh_186	1	2	4	2	2	1	2	4	1	9	6	0.75	-	Agabi_varbisH97_2_122165	Armosto1_257598	Auramp1_400721	Copci_AmutBmut1_461315	Cryne_JEC21_1_4287	Mk_00038800	PleosPC15_2_1048694	Ptegra1_535222	Schco3_1171804	IPR034646::UbiB domain; ADCK3-like::9	IPR004147::UbiB domain::9	IPR011009::Protein kise-like domain superfamily::8								409	YGL119W_COQ8_Sacce1 stk-25_Neucr AN6572_Aspnid	Uncharacterized ORF Orthologs have ATPase activity; lipid binding; protein kise activity			Protein required for ubiquinone biosynthesis and respiratory growth; exhibits genetic interaction with COQ9; suggesting a common function; similar to prokaryotic proteins involved in early steps of ubiquinone biosynthesis; COQ8 has a paralog; YBR230W-A; that arose from the whole genome duplication
Cons_CM-specific	orbh_2178	1	1	4	2	2	2	2	1	4	9	6	0.75	-	Agabi_varbisH97_2_205329	Armosto1_251073	Auramp1_572632	Copci_AmutBmut1_381351	Cryne_JEC21_1_1868	Mk_01325800	PleosPC15_2_1088797	Ptegra1_610406	Schco3_2511180	IPR012132::Glucose-methanol-choline oxidoreductase::9	IPR000172::Glucose-methanol-choline oxidoreductase; N-termil::9	IPR007867::Glucose-methanol-choline oxidoreductase; C-termil::9	IPR036188::FAD/D(P)-binding domain superfamily::9	IPR027424::Glucose Oxidase; domain 2::8						152	AN4006_Aspnid	Verified ORF Putative glucose oxidase with a predicted role in gluconic acid and glucote metabolism
Cons_CM-specific	orbh_252	1	1	4	2	1	2	2	2	4	9	6	0.75	-	Agabi_varbisH97_2_133983	Armosto1_257946	Auramp1_408911	Copci_AmutBmut1_5559	Cryne_JEC21_1_2538	Mk_01227200	PleosPC15_2_1052108	Ptegra1_650946	Schco3_2605787	IPR036291::D(P)-binding domain superfamily::9	IPR000683::Oxidoreductase; N-termil::9	IPR013944::Oxidoreductase putative; C-termil::9								153	SPAC2E11.17_pombe
Cons_CM-specific	orbh_2626	1	2	2	4	1	1	2	2	4	9	6	0.75	-	Agabi_varbisH97_2_225560	Armosto1_255001	Auramp1_509495	Copci_AmutBmut1_407528	Cryne_JEC21_1_2298	Mk_00237800	PleosPC15_2_1112854	Ptegra1_608058	Schco3_2642318	IPR001680::WD40 repeat::9	IPR017986::WD40-repeat-containing domain::9	IPR037597::Nucleoporin Seh1::9	IPR036322::WD40-repeat-containing domain superfamily::9	IPR037363::Sec13/Seh1 family::9	IPR020472::G-protein beta WD-40 repeat::8					218	YGL100W_SEH1_Sacce1 seh1_pombe	Uncharacterized ORF Putative nuclear pore complex protein with homology to Saccharomyces cerevisiae Seh1p		SEA complex subunit Seh1	Component of two distinct complexes; subunit of the Nup84 nuclear pore sub-complex (NPC) and the Seh1-associated (SEA) complex; the the NUP84 subcomplex contributes to nucleocytoplasmic transport and NPC biogenesis; the SEA complex is a coatamer-related complex that associates dymically with the vacuole; homologous to human SEH1
Cons_CM-specific	orbh_2652	1	2	2	2	2	1	1	4	4	9	6	0.75	-	Agabi_varbisH97_2_227329	Armosto1_258948	Auramp1_492525	Copci_AmutBmut1_498081	Cryne_JEC21_1_5261	Mk_01007000	PleosPC15_2_1044956	Ptegra1_160501	Schco3_1107091	IPR001222::Zinc finger; TFIIS-type::9	IPR012164::D-directed R polymerase subunit/transcription factor S::8	IPR001529::D-directed R polymerase; M/15kDa subunit::8	IPR034014::Pol III subunit C11; C-termil zinc ribbon::7	IPR006288::Transcription factor S::2						389	rpc11_pombe YDR045C_RPC11_Sacce1 NCU00570_Neucr			D-directed R polymerase III complex subunit Rpc11	R polymerase III subunit C11; mediates pol III R cleavage activity and is important for termition of transcription; homologous to TFIIS
Cons_CM-specific	orbh_2726	1	2	4	4	1	1	2	2	2	9	6	0.75	-	Agabi_varbisH97_2_56953	Armosto1_268958	Auramp1_485949	Copci_AmutBmut1_413807	Cryne_JEC21_1_5886	Mk_01254800	PleosPC15_2_1037639	Ptegra1_558959	Schco3_2610174	IPR021036::Ribosomal protein S35; mitochondrial::8										86
Cons_CM-specific	orbh_3177	1	2	4	2	1	1	2	4	2	9	6	0.75	-	Agabi_varbisH97_2_190181	Armosto1_255613	Auramp1_383882	Copci_AmutBmut1_505578	Cryne_JEC21_1_683	Mk_01047300	PleosPC15_2_153272	Ptegra1_15678	Schco3_2608339	IPR016712::Mitochondrial ribosomal protein MRP51; fungi::9										77
Cons_CM-specific	orbh_400	1	2	4	2	1	1	2	2	4	9	6	0.75	-	Agabi_varbisH97_2_147520	Armosto1_269001	Auramp1_566666	Copci_AmutBmut1_357958	Cryne_JEC21_1_3167	Mk_01283700	PleosPC15_2_49695	Ptegra1_581614	Schco3_2610759	IPR036402::Elongation factor Ts; dimerisation domain superfamily::9	IPR014039::Translation elongation factor EFTs/EF1B; dimerisation::9	IPR001816::Translation elongation factor EFTs/EF1B::9	IPR009060::UBA-like superfamily::9	IPR018101::Translation elongation factor Ts; conserved site::2						162	TSF1_ustilago TSF1_cryptococcus
Cons_CM-specific	orbh_3033	0	2	4	2	1	1	2	2	4	8	6	0.75	-	Agabi_varbisH97_2_66005	Armosto1_253281	Auramp1_400640	Copci_AmutBmut1_92378		Mk_00389400	PleosPC15_2_1046937	Ptegra1_469196	Schco3_2627285	IPR013087::Zinc finger C2H2-type::7	IPR036236::Zinc finger C2H2 superfamily::7									23
Cons_CM-specific	orbh_3145	0	2	2	2	1	2	4	4	1	8	6	0.75	-	Agabi_varbisH97_2_61584	Armosto1_268971	Auramp1_566478	Copci_AmutBmut1_472095		Mk_01261900	PleosPC15_2_1063138	Ptegra1_140588	Schco3_2148287	IPR011598::Myc-type; basic helix-loop-helix (bHLH) domain::8	IPR036638::Helix-loop-helix D-binding domain superfamily::8									83
Cons_CM-specific	orbh_3506	0	4	4	2	2	1	1	2	2	8	6	0.75	-	Agabi_varbisH97_2_116236	Armosto1_253181	Auramp1_568097	Copci_AmutBmut1_291832		Mk_00425000	PleosPC15_2_161264	Ptegra1_346853	Schco3_1094803	IPR001683::Phox homology::1	IPR000270::PB1 domain::1									44
Cons_CM-specific	orbh_3528	0	2	2	4	4	2	2	1	1	8	6	0.75	-	Agabi_varbisH97_2_117829	Armosto1_250748	Auramp1_554435	Copci_AmutBmut1_538310		Mk_01375800	PleosPC15_2_1083864	Ptegra1_602173	Schco3_2670087	IPR001841::Zinc finger; RING-type::8	IPR017907::Zinc finger; RING-type; conserved site::7	IPR027370::RING-type zinc-finger; LisH dimerisation motif::6								84
Cons_CM-specific	orbh_3537	0	2	2	2	4	1	2	1	4	8	6	0.75	-	Agabi_varbisH97_2_118790	Armosto1_265143	Auramp1_216312	Copci_AmutBmut1_466933		Mk_01441300	PleosPC15_2_1093872	Ptegra1_610898	Schco3_2535442											68
Cons_CM-specific	orbh_3566	0	2	1	4	2	1	2	4	2	8	6	0.75	-	Agabi_varbisH97_2_121272	Armosto1_253450	Auramp1_484362	Copci_AmutBmut1_473384		Mk_00266200	PleosPC15_2_1073145	Ptegra1_536860	Schco3_2628620	IPR007219::Transcription factor domain; fungi::8	IPR001138::Zn(2)-C6 fungal-type D-binding domain::6	IPR036864::Zn(2)-C6 fungal-type D-binding domain superfamily::6								179	AN2324_Aspnid	Uncharacterized ORF Has domains with predicted D binding; D-binding transcription factor activity; D-binding transcription factor activity; R polymerase II-specific; zinc ion binding activity
Cons_CM-specific	orbh_3569	0	2	2	4	1	2	2	1	4	8	6	0.75	-	Agabi_varbisH97_2_121641	Armosto1_254268	Auramp1_34161	Copci_AmutBmut1_164203		Mk_01165300	PleosPC15_2_1108477	Ptegra1_124540	Schco3_2515368											30
Cons_CM-specific	orbh_3593	0	2	4	1	2	1	2	2	4	8	6	0.75	-	Agabi_varbisH97_2_123224	Armosto1_250220	Auramp1_473844	Copci_AmutBmut1_415744		Mk_00692800	PleosPC15_2_1093255	Ptegra1_562476	Schco3_2632573	IPR032675::Leucine-rich repeat domain superfamily::8										82
Cons_CM-specific	orbh_3692	0	1	4	2	4	1	2	2	2	8	6	0.75	-	Agabi_varbisH97_2_152609	Armosto1_251718	Auramp1_498517	Copci_AmutBmut1_469725		Mk_00411300	PleosPC15_2_1074434	Ptegra1_63700	Schco3_2636410	IPR013212::Mad3/Bub1 homology region 1::8	IPR015661::Mitotic spindle checkpoint protein Bub1/Mad3::7									112	mad3_pombe			mitotic spindle checkpoint protein Mad3
Cons_CM-specific	orbh_3735	0	1	2	4	2	1	4	2	2	8	6	0.75	-	Agabi_varbisH97_2_178209	Armosto1_250465	Auramp1_563246	Copci_AmutBmut1_355621		Mk_00700700	PleosPC15_2_1112692	Ptegra1_507460	Schco3_2638531	IPR008979::Galactose-binding-like domain superfamily::6										44
Cons_CM-specific	orbh_3738	0	1	1	4	2	2	2	2	4	8	6	0.75	-	Agabi_varbisH97_2_178316	Armosto1_264701	Auramp1_398659	Copci_AmutBmut1_471337		Mk_01439200	PleosPC15_2_51409	Ptegra1_560883	Schco3_2495286	IPR002048::EF-hand domain::8	IPR006685::Mechanosensitive ion channel MscS::8	IPR011992::EF-hand domain pair::8	IPR018247::EF-Hand 1; calcium-binding site::8	IPR023408::Mechanosensitive ion channel MscS domain superfamily::8	IPR010920::LSM domain superfamily::8					130
Cons_CM-specific	orbh_3763	0	2	4	2	1	2	2	1	4	8	6	0.75	-	Agabi_varbisH97_2_179954	Armosto1_272086	Auramp1_504935	Copci_AmutBmut1_377427		Mk_00602800	PleosPC15_2_1105749	Ptegra1_600990	Schco3_2512368											70
Cons_CM-specific	orbh_3768	0	1	2	4	2	1	4	2	2	8	6	0.75	-	Agabi_varbisH97_2_180118	Armosto1_256403	Auramp1_538846	Copci_AmutBmut1_90822		Mk_00615300	PleosPC15_2_1109506	Ptegra1_553446	Schco3_2513146	IPR000182::GT domain::7	IPR016181::Acyl-CoA N-acyltransferase::7									10
Cons_CM-specific	orbh_3773	0	1	2	2	1	2	4	4	2	8	6	0.75	-	Agabi_varbisH97_2_180772	Armosto1_265897	Auramp1_493984	Copci_AmutBmut1_372030		Mk_00428100	PleosPC15_2_1089793	Ptegra1_538246	Schco3_2491309	IPR011990::Tetratricopeptide-like helical domain superfamily::4	IPR032675::Leucine-rich repeat domain superfamily::4									74
Cons_CM-specific	orbh_3907	0	1	2	2	2	1	4	2	4	8	6	0.75	-	Agabi_varbisH97_2_188160	Armosto1_269612	Auramp1_550461	Copci_AmutBmut1_354878		Mk_00085700	PleosPC15_2_1049697	Ptegra1_526764	Schco3_2672827	IPR017986::WD40-repeat-containing domain::8	IPR001680::WD40 repeat::8	IPR036047::F-box-like domain superfamily::8	IPR015943::WD40/YVTN repeat-like-containing domain superfamily::8	IPR036322::WD40-repeat-containing domain superfamily::8	IPR019775::WD40 repeat; conserved site::8	IPR001810::F-box domain::7				120
Cons_CM-specific	orbh_3988	0	1	4	2	1	4	2	2	2	8	6	0.75	-	Agabi_varbisH97_2_190568	Armosto1_257903	Auramp1_459545	Copci_AmutBmut1_354355		Mk_01193700	PleosPC15_2_1099178	Ptegra1_520762	Schco3_2742814	IPR007014::FUN14::8										139
Cons_CM-specific	orbh_4192	0	4	4	2	1	1	2	2	2	8	6	0.75	-	Agabi_varbisH97_2_195182	Armosto1_257640	Auramp1_498745	Copci_AmutBmut1_441790		Mk_01423100	PleosPC15_2_22046	Ptegra1_568607	Schco3_2636901	IPR007918::Mitochondrial distribution/morphology family 35/apoptosis::8										293	YKL053C-A_MDM35_Sacce1 AN10622_Aspnid	Uncharacterized ORF Orthologs have role in mitochondrial respiratory chain complex assembly; mitochondrion organization; phospholipid translocation; phospholipid transport and mitochondrial intermembrane space localization			Mitochondrial intermembrane space protein; mutation affects mitochondrial distribution and morphology; contains twin cysteine-x9-cysteine motifs; protein abundance increases in response to D replication stress
Cons_CM-specific	orbh_4206	0	1	4	2	2	1	4	2	2	8	6	0.75	-	Agabi_varbisH97_2_195581	Armosto1_267415	Auramp1_535655	Copci_AmutBmut1_257118		Mk_00173100	PleosPC15_2_53277	Ptegra1_346025	Schco3_2611941	IPR011050::Pectin lyase fold/virulence factor::8	IPR012334::Pectin lyase fold::8	IPR004898::Pectate lyase PlyH/PlyE-like::8								152	plyF_Aspnid NCU08176_Neucr AN6106_plyF_Aspnid	Uncharacterized ORF Putative pectate lyase with a predicted role in pectin degradation
Cons_CM-specific	orbh_4306	0	2	4	2	1	1	4	2	2	8	6	0.75	-	Agabi_varbisH97_2_202439	Armosto1_262112	Auramp1_545522	Copci_AmutBmut1_127844		Mk_00066600	PleosPC15_2_1092786	Ptegra1_415572	Schco3_2599410	IPR028018::Protein of unknown function DUF4646::3										44
Cons_CM-specific	orbh_4324	0	1	4	2	2	2	1	2	4	8	6	0.75	-	Agabi_varbisH97_2_203369	Armosto1_268987	Auramp1_398016	Copci_AmutBmut1_388319		Mk_01282100	PleosPC15_2_25134	Ptegra1_642511	Schco3_1166919	IPR011527::ABC transporter type 1; transmembrane domain::8	IPR027417::P-loop containing nucleoside triphosphate hydrolase::8	IPR003593::AAA+ ATPase domain::8	IPR003439::ABC transporter-like::8	IPR017871::ABC transporter; conserved site::8	IPR036640::ABC transporter type 1; transmembrane domain superfamily::8					229	NCU07276_Neucr AN7676_Aspnid	Uncharacterized ORF Has domains with predicted ATP binding; ATPase activity; ATPase-coupled transmembrane transporter activity; nucleoside-triphosphatase activity; nucleotide binding activity and role in transmembrane transport
Cons_CM-specific	orbh_4326	0	1	2	2	4	4	2	1	2	8	6	0.75	-	Agabi_varbisH97_2_203509	Armosto1_260968	Auramp1_394119	Copci_AmutBmut1_367214		Mk_00027000	PleosPC15_2_1038442	Ptegra1_647862	Schco3_2707232	IPR016024::Armadillo-type fold::1										31
Cons_CM-specific	orbh_4406	0	2	4	2	1	2	2	1	4	8	6	0.75	-	Agabi_varbisH97_2_211045	Armosto1_253328	Auramp1_559757	Copci_AmutBmut1_380677		Mk_00507600	PleosPC15_2_1068435	Ptegra1_594085	Schco3_2518287	IPR001214::SET domain::8										40
Cons_CM-specific	orbh_4410	0	1	1	2	2	2	4	2	4	8	6	0.75	-	Agabi_varbisH97_2_211293	Armosto1_255320	Auramp1_58054	Copci_AmutBmut1_546324		Mk_00970300	PleosPC15_2_1100961	Ptegra1_533478	Schco3_2064528	IPR008914::Phosphatidylethanolamine-binding protein::8	IPR035810::Phosphatidylethanolamine-binding protein; eukaryotic::8	IPR036610::PEBP-like superfamily::8	IPR001858::Phosphatidylethanolamine-binding; conserved site::2							323	AN8404_Aspnid NCU01112_Neucr YLR178C_TFS1_Sacce1	Uncharacterized ORF Orthologs have peptidase inhibitor activity; phospholipid binding activity and role in regulation of Ras protein sigl transduction; regulation of proteolysis			Inhibitor of carboxypeptidase Y (Prc1p); and Ras GAP (Ira2p); phosphatidylethanolamine-binding protein (PEBP) family member and ortholog of hPEBP1/RKIP; a tural metastasis suppressor; targets to vacuolar membranes during statiory phase; acetylated by tB N-termil acetyltransferase; protein abundance increases in response to D replication stress
Cons_CM-specific	orbh_4451	0	2	2	4	2	1	2	1	4	8	6	0.75	-	Agabi_varbisH97_2_215236	Armosto1_268750	Auramp1_407821	Copci_AmutBmut1_354859		Mk_00785400	PleosPC15_2_1074848	Ptegra1_427116	Schco3_2486953	IPR017853::Glycoside hydrolase superfamily::8	IPR001223::Glycoside hydrolase family 18; catalytic domain::8	IPR001579::Glycosyl hydrolases family 18 (GH18) active site::7	IPR003610::Carbohydrate-binding module family 5/12::7	IPR036573::Carbohydrate-binding module superfamily 5/12::7						324	CHT3_candida YLR286C_CTS1_Sacce1 gh18-1_Neucr AN11059_Aspnid	Uncharacterized ORF Putative chitise glycoside hydrolase family 18 (GH18) protein with a predicted role in chitin hydrolysis			Endochitise; required for cell separation after mitosis; transcriptiol activation during the G1 phase of the cell cycle is mediated by transcription factor Ace2p
Cons_CM-specific	orbh_4560	0	4	2	1	2	1	2	2	4	8	6	0.75	-	Agabi_varbisH97_2_53209	Armosto1_267282	Auramp1_403302	Copci_AmutBmut1_409706		Mk_01098700	PleosPC15_2_1105684	Ptegra1_601521	Schco3_2645139	IPR032675::Leucine-rich repeat domain superfamily::5										7
Cons_CM-specific	orbh_4582	0	2	4	2	1	1	2	2	4	8	6	0.75	-	Agabi_varbisH97_2_63301	Armosto1_257814	Auramp1_597217	Copci_AmutBmut1_180813		Mk_01184800	PleosPC15_2_1061244	Ptegra1_556896	Schco3_2606647	IPR032710::NTF2-like domain superfamily::5										152	AN2221_Aspnid	Uncharacterized ORF
Cons_CM-specific	orbh_4602	0	2	4	4	1	1	2	2	2	8	6	0.75	-	Agabi_varbisH97_2_65364	Armosto1_253077	Auramp1_491533	Copci_AmutBmut1_494308		Mk_00344000	PleosPC15_2_1113920	Ptegra1_581111	Schco3_2627547											81
Cons_CM-specific	orbh_4603	0	2	4	4	1	1	2	2	2	8	6	0.75	-	Agabi_varbisH97_2_65585	Armosto1_253006	Auramp1_489603	Copci_AmutBmut1_497645		Mk_00350300	PleosPC15_2_1090490	Ptegra1_563351	Schco3_2626853	IPR024518::Domain of unknown function DUF3421::8	IPR006616::DM9 repeat::8									99
Cons_CM-specific	orbh_4613	0	1	2	2	1	4	2	4	2	8	6	0.75	-	Agabi_varbisH97_2_66758	Armosto1_257547	Auramp1_238796	Copci_AmutBmut1_365932		Mk_00067700	PleosPC15_2_158155	Ptegra1_572514	Schco3_2542276	IPR027417::P-loop containing nucleoside triphosphate hydrolase::8	IPR013632::D recombition and repair protein Rad51-like; C-termil::8	IPR020588::D recombition and repair protein RecA-like; ATP-binding domain::4								107
Cons_CM-specific	orbh_4617	0	2	2	4	1	2	1	2	4	8	6	0.75	-	Agabi_varbisH97_2_67658	Armosto1_266798	Auramp1_409771	Copci_AmutBmut1_464031		Mk_00448600	PleosPC15_2_1040369	Ptegra1_587726	Schco3_2592175	IPR029058::Alpha/Beta hydrolase fold::8	IPR000073::Alpha/beta hydrolase fold-1::7									190
Cons_CM-specific	orbh_4618	0	2	4	4	1	1	2	2	2	8	6	0.75	-	Agabi_varbisH97_2_68000	Armosto1_261510	Auramp1_394202	Copci_AmutBmut1_439634		Mk_00073400	PleosPC15_2_1028171	Ptegra1_653316	Schco3_2623674	IPR011990::Tetratricopeptide-like helical domain superfamily::2	IPR002885::Pentatricopeptide repeat::1									96
Cons_CM-specific	orbh_4640	0	1	4	2	2	2	2	4	1	8	6	0.75	-	Agabi_varbisH97_2_71267	Armosto1_265288	Auramp1_399521	Copci_AmutBmut1_362267		Mk_01100700	PleosPC15_2_1113180	Ptegra1_576052	Schco3_1090199	IPR002867::IBR domain::8	IPR001841::Zinc finger; RING-type::8	IPR013083::Zinc finger; RING/FYVE/PHD-type::8	IPR044066::TRIAD supradomain::8	IPR031127::E3 ubiquitin ligase RBR family::8	IPR017907::Zinc finger; RING-type; conserved site::7	IPR018957::Zinc finger; C3HC4 RING-type::4				2
Cons_CM-specific	orbh_4648	0	1	2	4	2	1	2	2	4	8	6	0.75	-	Agabi_varbisH97_2_72717	Armosto1_270794	Auramp1_568595	Copci_AmutBmut1_360717		Mk_00903600	PleosPC15_2_1044820	Ptegra1_115113	Schco3_2685625	IPR008979::Galactose-binding-like domain superfamily::8	IPR029411::Rhamnogalacturon lyase; domain III::8	IPR013784::Carbohydrate-binding-like fold::8	IPR015364::Rhamnogalacturose B; N-termil::8	IPR016590::Rhamnogalacturose B::8	IPR029413::Rhamnogalacturon lyase; domain II::8	IPR014718::Glycoside hydrolase-type carbohydrate-binding::8	IPR011013::Galactose mutarotase-like domain superfamily::8			143
Cons_CM-specific	orbh_4681	0	2	4	2	1	2	4	1	2	8	6	0.75	-	Agabi_varbisH97_2_78715	Armosto1_262279	Auramp1_545198	Copci_AmutBmut1_358329		Mk_00123500	PleosPC15_2_1112414	Ptegra1_531292	Schco3_2666784	IPR029058::Alpha/Beta hydrolase fold::8	IPR000639::Epoxide hydrolase-like::8	IPR000073::Alpha/beta hydrolase fold-1::8								313	NCU02924_Neucr
Cons_CM-specific	orbh_4752	0	1	4	2	2	2	1	2	4	8	6	0.75	-	Agabi_varbisH97_2_115785	Armosto1_253699	Auramp1_516719	Copci_AmutBmut1_440564		Mk_01358200	PleosPC15_2_1033422	Ptegra1_590169	Schco3_2694468	IPR001932::PPM-type phosphatase domain::8	IPR015655::Protein phosphatase 2C family::8	IPR036457::PPM-type phosphatase domain superfamily::8								14
Cons_CM-specific	orbh_4856	0	2	2	2	1	1	4	4	2	8	6	0.75	-	Agabi_varbisH97_2_188335	Armosto1_264920	Auramp1_501090	Copci_AmutBmut1_375360		Mk_00885000	PleosPC15_2_1070028	Ptegra1_583982	Schco3_2612846	IPR000387::Tyrosine specific protein phosphatases domain::8	IPR029021::Protein-tyrosine phosphatase-like::8	IPR016130::Protein-tyrosine phosphatase; active site::8	IPR000340::Dual specificity phosphatase; catalytic domain::6							87
Cons_CM-specific	orbh_4872	0	2	2	2	1	1	2	4	4	8	6	0.75	-	Agabi_varbisH97_2_193239	Armosto1_265376	Auramp1_485412	Copci_AmutBmut1_250720		Mk_01092600	PleosPC15_2_1077485	Ptegra1_610798	Schco3_2527742	IPR000757::Glycoside hydrolase family 16::8	IPR013320::Concavalin A-like lectin/glucase domain superfamily::8									126
Cons_CM-specific	orbh_4923	0	4	2	4	1	1	2	2	2	8	6	0.75	-	Agabi_varbisH97_2_208266	Armosto1_269003	Auramp1_494592	Copci_AmutBmut1_361816		Mk_01031800	PleosPC15_2_1111031	Ptegra1_562296	Schco3_2640559	IPR004813::Oligopeptide transporter; OPT superfamily::7	IPR018188::Ribonuclease T2; His active site 1::2	IPR033130::Ribonuclease T2; His active site 2::2	IPR036430::Ribonuclease T2-like superfamily::2	IPR033697::Ribonuclease T2; eukaryotic::2	IPR001568::Ribonuclease T2-like::2					216	NCU09874_Neucr
Cons_CM-specific	orbh_4939	0	2	2	4	1	1	2	2	4	8	6	0.75	-	Agabi_varbisH97_2_211641	Armosto1_269884	Auramp1_565784	Copci_AmutBmut1_42956		Mk_01487900	PleosPC15_2_1013978	Ptegra1_574538	Schco3_2504802	IPR041622::SMODS and SLOG-associating 2TM effector domain; fungi::8										66
Cons_CM-specific	orbh_5033	0	2	2	4	1	1	2	2	4	8	6	0.75	-	Agabi_varbisH97_2_194119	Armosto1_254718	Auramp1_498432	Copci_AmutBmut1_14629		Mk_00423500	PleosPC15_2_1034381	Ptegra1_566271	Schco3_2752794	IPR038271::Purine-cytosine permease superfamily::1	IPR001248::Purine-cytosine permease::1	IPR012681::Nucleobase cation symporter-1; NCS1::1								70
Cons_CM-specific	orbh_5402	0	2	0	4	1	2	4	2	2	7	6	0.857143	-	Agabi_varbisH97_2_192642	Armosto1_250689	Auramp1_422633	Copci_AmutBmut1_193231		Mk_00649400		Ptegra1_562369	Schco3_2670536	IPR020843::Polyketide synthase; enoylreductase domain::7	IPR013149::Alcohol dehydrogese; C-termil::7	IPR036291::D(P)-binding domain superfamily::7	IPR011032::GroES-like superfamily::7	IPR013154::Alcohol dehydrogese; N-termil::6	IPR002364::Quinone oxidoreductase/zeta-crystallin; conserved site::6					347	NCU11325_Neucr AN9075_Aspnid	Uncharacterized ORF Has domains with predicted oxidoreductase activity; zinc ion binding activity and role in oxidation-reduction process
Cons_CM-specific	orbh_5446	0	2	2	0	2	1	2	4	4	7	6	0.857143	-	Agabi_varbisH97_2_195468	Armosto1_252673	Auramp1_467425	Copci_AmutBmut1_501903			PleosPC15_2_1094871	Ptegra1_550557	Schco3_2550918	IPR003663::Sugar/inositol transporter::7	IPR005829::Sugar transporter; conserved site::7	IPR020846::Major facilitator superfamily domain::7	IPR036259::MFS transporter superfamily::7	IPR005828::Major facilitator; sugar transporter-like::7						369	AN2466_Aspnid NCU08152_Neucr HGT1_candida	Uncharacterized ORF Has domains with predicted transmembrane transporter activity; role in transmembrane transport and integral component of membrane; membrane localization
Cons_CM-specific	orbh_5558	0	2	2	0	1	2	4	4	2	7	6	0.857143	-	Agabi_varbisH97_2_228399	Armosto1_255579	Auramp1_480218	Copci_AmutBmut1_415039			PleosPC15_2_1103735	Ptegra1_560383	Schco3_2622540	IPR036452::Ribonucleoside hydrolase-like::7	IPR001910::Inosine/uridine-preferring nucleoside hydrolase domain::7	IPR023186::Inosine/uridine-preferring nucleoside hydrolase::7								369	SPAC17G8.02_pombe YDR400W_URH1_Sacce1 NCU02055_Neucr			uridine ribohydrolase Urh2 (predicted)	Uridine nucleosidase (uridine-cytidine N-ribohydrolase); cleaves N-glycosidic bonds in nucleosides; involved in the pyrimidine salvage and nicotimide riboside salvage pathways
Cons_CM-specific	orbh_5565	0	1	4	2	2	2	0	2	4	7	6	0.857143	-	Agabi_varbisH97_2_230152		Auramp1_499656	Copci_AmutBmut1_501707		Mk_01094000	PleosPC15_2_1045604	Ptegra1_565796	Schco3_2614113	IPR029035::DHS-like D/FAD-binding domain superfamily::6	IPR011766::Thiamine pyrophosphate enzyme; C-termil TPP-binding::6	IPR029061::Thiamin diphosphate-binding fold::6	IPR012001::Thiamine pyrophosphate enzyme; N-termil TPP-binding domain::5	IPR012000::Thiamine pyrophosphate enzyme; central domain::2						265	NCU08771_Neucr
Cons_CM-specific	orbh_5592	0	2	4	0	2	1	4	2	2	7	6	0.857143	-	Agabi_varbisH97_2_74862	Armosto1_270185	Auramp1_634162	Copci_AmutBmut1_164498			PleosPC15_2_1114089	Ptegra1_608593	Schco3_1103590	IPR012882::Putative redox protein Fmp46::7	IPR036249::Thioredoxin-like superfamily::7									147	AN8750_Aspnid	Uncharacterized ORF Has domains with predicted oxidoreductase activity; role in oxidation-reduction process and mitochondrion localization
Cons_CM-specific	orbh_5720	0	1	4	0	2	2	4	2	2	7	6	0.857143	-	Agabi_varbisH97_2_191961	Armosto1_262003	Auramp1_113343	Copci_AmutBmut1_496866			PleosPC15_2_1039560	Ptegra1_569434	Schco3_2623454	IPR000571::Zinc finger; CCCH-type::4										69	AN8633_Aspnid	Uncharacterized ORF Protein of unknown function
Cons_CM-specific	orbh_5825	0	0	4	2	2	1	2	2	4	7	6	0.857143	-	Agabi_varbisH97_2_176542	Armosto1_251117	Auramp1_18455	Copci_AmutBmut1_470946		Mk_00246200	PleosPC15_2_1041547		Schco3_2586404											5
Cons_CM-specific	orbh_5892	0	2	4	0	2	1	4	2	2	7	6	0.857143	-	Agabi_varbisH97_2_64770	Armosto1_257853	Auramp1_500458	Copci_AmutBmut1_373270			PleosPC15_2_1087872	Ptegra1_587997	Schco3_2606510	IPR012420::Cbp4::4										93
Cons_CM-specific	orbh_5979	0	0	4	2	1	2	2	4	2	7	6	0.857143	-	Agabi_varbisH97_2_179520	Armosto1_271316	Auramp1_504526	Copci_AmutBmut1_473070		Mk_00686900	PleosPC15_2_1113529		Schco3_2465105											19
Cons_CM-specific	orbh_6026	0	0	0	2	2	2	4	2	4	6	6	1	-	Agabi_varbisH97_2_116256	Armosto1_253295	Auramp1_547480	Copci_AmutBmut1_498913		Mk_01105800			Schco3_2668278											118
Cons_CM-specific	orbh_6146	0	0	2	0	2	2	4	2	4	6	6	1	-	Agabi_varbisH97_2_196051	Armosto1_250156	Auramp1_24537	Copci_AmutBmut1_448876			PleosPC15_2_1089359		Schco3_2633925	IPR015946::K homology domain-like; alpha/beta::6	IPR019953::Organic hydroperoxide resistance protein famiy::6	IPR003718::OsmC/Ohr family::6	IPR036102::OsmC/Ohr superfamily::6							156
Cons_CM-specific	orbh_6292	0	2	2	2	0	0	2	4	4	6	6	1	-	Agabi_varbisH97_2_176650	Armosto1_257901		Copci_AmutBmut1_436970		Mk_01193900	PleosPC15_2_1095345	Ptegra1_588135												60
Cons_CM-specific	orbh_6353	0	0	4	0	2	2	2	2	4	6	6	1	-	Agabi_varbisH97_2_119444	Armosto1_267137	Auramp1_506798	Copci_AmutBmut1_540784			PleosPC15_2_1087986		Schco3_2604689	IPR000089::Biotin/lipoyl attachment::6	IPR011053::Single hybrid motif::6									13
Cons_CM-specific	orbh_1170	1	2	2	4	1	2	2	1	2	9	6	0.75	-	Agabi_varbisH97_2_190269	Armosto1_270840	Auramp1_511394	Copci_AmutBmut1_447285	Cryne_JEC21_1_2422	Mk_00707000	PleosPC15_2_1093434	Ptegra1_330891	Schco3_2098354	IPR011004::Trimeric LpxA-like superfamily::9	IPR027777::Dyctin subunit 6::9									202
Cons_CM-specific	orbh_1190	1	2	4	2	2	2	2	1	1	9	6	0.75	-	Agabi_varbisH97_2_190388	Armosto1_258529	Auramp1_550386	Copci_AmutBmut1_414776	Cryne_JEC21_1_1075	Mk_01037100	PleosPC15_2_1073630	Ptegra1_599625	Schco3_2563237	IPR012677::Nucleotide-binding alpha-beta plait domain superfamily::9	IPR035979::R-binding domain superfamily::9	IPR000504::R recognition motif domain::9								366	NCU07069_Neucr AN4978_Aspnid srp2_pombe	Uncharacterized ORF Orthologs have role in mR export from nucleus and nucleus localization		splicing factor Srp2
Cons_CM-specific	orbh_1296	1	1	4	2	2	2	2	2	1	9	6	0.75	-	Agabi_varbisH97_2_191242	Armosto1_252975	Auramp1_491793	Copci_AmutBmut1_29221	Cryne_JEC21_1_1864	Mk_00607000	PleosPC15_2_1046880	Ptegra1_544854	Schco3_2642912	IPR015943::WD40/YVTN repeat-like-containing domain superfamily::9	IPR037631::mR export factor Gle2/RAE1::9	IPR036322::WD40-repeat-containing domain superfamily::9	IPR001680::WD40 repeat::9	IPR017986::WD40-repeat-containing domain::9	IPR020472::G-protein beta WD-40 repeat::7	IPR024977::Aphase-promoting complex subunit 4; WD40 domain::5				419	NCU04288_Neucr YER107C_GLE2_Sacce1 rae1_pombe AN1379_so_Aspnid	Verified ORF Putative nuclear pore complex protein extragenic suppressor of nimA1 similar to Schizosaccharomyces pombe Rae1 and Saccharomyces cerevisiae Gle2		R export factor; nucleoporin Rae1	R export factor associated with the nuclear pore complex (NPC); associates with NUP116p; required for polyadenylated R export but not for protein import; homologous to S. pombe Rae1p and human RAE1
Cons_CM-specific	orbh_1327	1	2	4	1	2	1	2	2	2	9	6	0.75	-	Agabi_varbisH97_2_191641	Armosto1_261354	Auramp1_396303	Copci_AmutBmut1_458947	Cryne_JEC21_1_820	Mk_00048300	PleosPC15_2_1039986	Ptegra1_560075	Schco3_2630023	IPR002942::R-binding S4 domain::9	IPR001912::Ribosomal protein S4/S9; N-termil::9	IPR022801::Ribosomal protein S4/S9::9	IPR036986::R-binding S4 domain superfamily::6							415	imp3_pombe AN6171_Aspnid YHR148W_IMP3_Sacce1 NCU01008_Neucr	Uncharacterized ORF Orthologs have snoR binding activity; role in rR processing; ribosomal small subunit biogenesis and Mpp10 complex; small-subunit processome localization		U3 snoRNP-associated protein Imp3 (predicted)	Component of the SSU processome; SSU processome is required for pre-18S rR processing; essential protein that interacts with Mpp10p and mediates interactions of Imp4p and Mpp10p with U3 snoR
Cons_CM-specific	orbh_1655	1	2	4	2	1	1	2	2	2	9	6	0.75	-	Agabi_varbisH97_2_194100	Armosto1_255655	Auramp1_433118	Copci_AmutBmut1_118369	Cryne_JEC21_1_920	Mk_01098100	PleosPC15_2_1025436	Ptegra1_529233	Schco3_2636824	IPR019189::Ribosomal protein L27/L41; mitochondrial::8										111
Cons_CM-specific	orbh_1854	1	2	2	4	2	1	2	2	1	9	6	0.75	-	Agabi_varbisH97_2_196004	Armosto1_270152	Auramp1_483138	Copci_AmutBmut1_420508	Cryne_JEC21_1_5623	Mk_01006700	PleosPC15_2_1068930	Ptegra1_537606	Schco3_2505477	IPR003578::Small GTPase Rho::9	IPR001806::Small GTPase::9	IPR027417::P-loop containing nucleoside triphosphate hydrolase::9	IPR005225::Small GTP-binding protein domain::9							192	rho4_pombe rho-4_Neucr	Verified ORF Putative Rho-like GTPase		Rho family GTPase Rho4
Cons_CM-specific	orbh_1892	1	1	4	2	1	2	2	2	2	9	6	0.75	-	Agabi_varbisH97_2_196434	Armosto1_266456	Auramp1_503017	Copci_AmutBmut1_465599	Cryne_JEC21_1_5787	Mk_00631200	PleosPC15_2_1102534	Ptegra1_574718	Schco3_2697775	IPR002678::GTP cyclohydrolase 1 type 2/Nif3::9	IPR036069::GTP cyclohydrolase 1 type 2/Nif3 superfamily::9									407	AN10437_Aspnid YGL221C_NIF3_Sacce1 NCU06108_Neucr SPCC126.12_pombe	Uncharacterized ORF Orthologs have cytoplasm; mitochondrion localization		GTP cyclohydrolase (predicted)	Protein of unknown function; similar to Listeria monocytogenes major sigma factor (rpoD gene product); the authentic; non-tagged protein is detected in highly purified mitochondria in high-throughput studies
Cons_CM-specific	orbh_2308	1	2	2	1	2	2	1	2	4	9	6	0.75	-	Agabi_varbisH97_2_209917	Armosto1_253327	Auramp1_502819	Copci_AmutBmut1_470502	Cryne_JEC21_1_560	Mk_01396900	PleosPC15_2_1093950	Ptegra1_505621	Schco3_2614641	IPR011531::Bicarbote transporter; C-termil::9	IPR003020::Bicarbote transporter; eukaryotic::9									384	SPBC543.05c_pombe YNL275W_BOR1_Sacce1 AN4904_Aspnid NCU01480_Neucr	Uncharacterized ORF Has domains with predicted role in anion transport and integral component of membrane localization		plasma membrane borate efflux transmembrane transporter Bor1 (predicted)	Boron efflux transporter of the plasma membrane; binds HCO3-; I-; Br-; NO3- and Cl-; has similarity to the characterized boron efflux transporter A. thalia BOR1
Cons_CM-specific	orbh_2314	1	2	2	1	2	1	2	2	4	9	6	0.75	-	Agabi_varbisH97_2_210125	Armosto1_271727	Auramp1_197601	Copci_AmutBmut1_489308	Cryne_JEC21_1_4464	Mk_01145400	PleosPC15_2_1098009	Ptegra1_605737	Schco3_2529252	IPR001708::Membrane insertase YidC/ALB3/OXA1/COX18::9										267	oxa102_pombe YER154W_OXA1_Sacce1 AN8229_Aspnid	Uncharacterized ORF Orthologs have membrane insertase activity; mitochondrial ribosome binding activity		mitochondrial inner membrane insertase Oxa102	Mitochondrial inner membrane insertase; mediates the insertion of both mitochondrial- and nuclear-encoded proteins from the matrix into the inner membrane; also has a role in insertion of carrier proteins into the inner membrane; acts as a voltage-gated ion channel; activated by substrate peptides; interacts with mitochondrial ribosomes; conserved from bacteria to animals
Cons_CM-specific	orbh_2377	1	2	2	2	2	1	2	1	4	9	6	0.75	-	Agabi_varbisH97_2_213497	Armosto1_262795	Auramp1_625616	Copci_AmutBmut1_490631	Cryne_JEC21_1_1746	Mk_01278000	PleosPC15_2_1036850	Ptegra1_521527	Schco3_2613614	IPR001494::Importin-beta; N-termil domain::9	IPR016024::Armadillo-type fold::9	IPR011989::Armadillo-like helical::7								353	YGL241W_KAP114_Sacce1 NCU06578_Neucr kap114_pombe			karyopherin/importin beta family nuclear import sigl receptor Kap14	Karyopherin; responsible for nuclear import of specific proteins; cargoes include Spt15p; Sua7p; histones H2A and H2B; and p1p; amino terminus shows similarity to those of other importins; particularly Cse1p; localization is primarily nuclear; function is regulated by sumoylation; protein abundance increases in response to D replication stress
Cons_CM-specific	orbh_2641	1	2	1	2	1	4	2	2	2	9	6	0.75	-	Agabi_varbisH97_2_226601	Armosto1_253766	Auramp1_502641	Copci_AmutBmut1_446036	Cryne_JEC21_1_2917	Mk_00235600	PleosPC15_2_1091212	Ptegra1_544774	Schco3_2597546	IPR004143::Biotinyl protein ligase (BPL) and lipoyl protein ligase (LPL); catalytic domain::9	IPR019197::Biotin-protein ligase; N-termil::9	IPR004408::Biotin--acetyl-CoA-carboxylase ligase::7								355	bpl1_pombe YDL141W_BPL1_Sacce1 NCU05516_Neucr			biotin-protein ligase Bpl1 (predicted)	Biotin:apoprotein ligase; covalently modifies proteins with the addition of biotin; required for acetyl-CoA carboxylase (Acc1p) holoenzyme formation; comparative alysis suggests that a mitochondrially targeted form may result from translation starting at a non-canonical codon upstream of the annotated start codon
Cons_CM-specific	orbh_2764	1	2	2	1	2	1	4	2	2	9	6	0.75	-	Agabi_varbisH97_2_63012	Armosto1_268243	Auramp1_497020	Copci_AmutBmut1_501843	Cryne_JEC21_1_4461	Mk_00765400	PleosPC15_2_24781	Ptegra1_652854	Schco3_2521002	IPR018767::Brl1/Brr6 domain::9	IPR040202::Nucleus export protein Brl1/Brr6::9									99
Cons_CM-specific	orbh_2934	1	2	4	2	1	1	2	2	2	9	6	0.75	-	Agabi_varbisH97_2_73727	Armosto1_254740	Auramp1_432900	Copci_AmutBmut1_446836	Cryne_JEC21_1_4638	Mk_01425500	PleosPC15_2_1035043	Ptegra1_543539	Schco3_2641293	IPR007849::ATPase assembly factor ATP10::9										383	AN1230_Aspnid atp10_pombe NCU02705_Neucr YLR393W_ATP10_Sacce1	Uncharacterized ORF		mitochondrial F1-FO ATPase assembly protein (predicted)	Assembly factor for the F0 sector of mitochondrial F1F0 ATP synthase; mitochondrial inner membrane protein; interacts genetically with ATP6
Cons_CM-specific	orbh_3053	1	4	2	2	2	2	2	1	1	9	6	0.75	-	Agabi_varbisH97_2_120670	Armosto1_256280	Auramp1_615024	Copci_AmutBmut1_498324	Cryne_JEC21_1_4450	Mk_00036500	PleosPC15_2_1079689	Ptegra1_93665	Schco3_2671175											2
Cons_CM-specific	orbh_3195	1	2	2	4	1	2	1	2	2	9	6	0.75	-	Agabi_varbisH97_2_204037	Armosto1_253677	Auramp1_473920	Copci_AmutBmut1_438589	Cryne_JEC21_1_3472	Mk_00689300	PleosPC15_2_1076788	Ptegra1_612453	Schco3_2632665	IPR004556::Methyltransferase HemK-like::9	IPR029063::S-adenosyl-L-methionine-dependent methyltransferase::9	IPR007848::Methyltransferase small domain::4	IPR040758::Release factor glutamine methyltransferase; N-termil domain::3	IPR002052::D methylase; N-6 adenine-specific; conserved site::3	IPR025714::Methyltransferase domain::2					295	AN10829_Aspnid mtq1_pombe YNL063W_MTQ1_Sacce1	Uncharacterized ORF Orthologs have S-adenosylmethionine-dependent methyltransferase activity and role in translatiol readthrough		mitochondrial N(5)-glutamine methyltransferase (predicted)	S-adenosylmethionine-dependent methyltransferase; methylates translatiol release factor Mrf1p; similar to E.coli PrmC; is not an essential gene
Cons_CM-specific	orbh_3333	1	1	2	2	2	2	2	1	4	9	6	0.75	-	Agabi_varbisH97_2_205203	Armosto1_251259	Auramp1_199089	Copci_AmutBmut1_439759	Cryne_JEC21_1_3206	Mk_00416400	PleosPC15_2_1089673	Ptegra1_557752	Schco3_2675577	IPR001623::DJ domain::9	IPR036869::Chaperone J-domain superfamily::9									119
Cons_CM-specific	orbh_3343	1	2	2	1	2	1	2	4	2	9	6	0.75	-	Agabi_varbisH97_2_179248	Armosto1_271050	Auramp1_401653	Copci_AmutBmut1_374749	Cryne_JEC21_1_3597	Mk_00608000	PleosPC15_2_1075339	Ptegra1_517355	Schco3_2616873	IPR036551::Flavin prenyltransferase-like::9	IPR003382::Flavoprotein::9									357	NCU04237_Neucr AN4305_Aspnid	Uncharacterized ORF Has domains with predicted catalytic activity
Cons_CM-specific	orbh_754	1	2	2	2	1	2	1	4	2	9	6	0.75	-	Agabi_varbisH97_2_184188	Armosto1_253155	Auramp1_454589	Copci_AmutBmut1_437221	Cryne_JEC21_1_5609	Mk_00360800	PleosPC15_2_1047498	Ptegra1_590934	Schco3_2689018	IPR013776::Alpha-amylase; thermostable::9	IPR017853::Glycoside hydrolase superfamily::9	IPR006047::Glycosyl hydrolase; family 13; catalytic domain::9	IPR013780::Glycosyl hydrolase; all-beta::9							270	AN3309_amyG_Aspnid gh13-3_Neucr	Uncharacterized ORF Putative alpha-amylase with a predicted role in starch metabolism
Cons_CM-specific	orbh_934	1	1	2	2	2	1	2	2	4	9	6	0.75	-	Agabi_varbisH97_2_187647	Armosto1_253846	Auramp1_396634	Copci_AmutBmut1_403599	Cryne_JEC21_1_1903	Mk_01034600	PleosPC15_2_1073335	Ptegra1_503093	Schco3_2505052	IPR001650::Helicase; C-termil::9	IPR014001::Helicase superfamily 1/2; ATP-binding domain::9	IPR027417::P-loop containing nucleoside triphosphate hydrolase::9	IPR000330::SNF2-related; N-termil domain::9	IPR038718::SNF2-like; N-termil domain superfamily::4						386	AN7538_Aspnid NCU04786_Neucr SPBC582.10c_pombe YOR191W_ULS1_Sacce1	Uncharacterized ORF Has domains with predicted ATP binding; D binding; helicase activity; nucleic acid binding activity		ATP-dependent D helicase Rhp16b (predicted)	Swi2/Snf2-related translocase; SUMO-Targeted Ubiquitin Ligase (STUbL); required for maintence of NHEJ inhibition at telomeres; functions at telomeres to translocate and ubiquitinylate poly-sumoylated Rap1p for proteosomal degradation; plays role in antagonizing silencing during mating-type switching; only known STUbL with a translocase activity; contains RING finger domain; relocalizes from nucle…
Cons_CM-specific	orbh_3760	1	2	2	2	4	1	0	2	2	8	6	0.857143	-	Agabi_varbisH97_2_179798		Auramp1_498492	Copci_AmutBmut1_363821	Cryne_JEC21_1_3217	Mk_00407900	PleosPC15_2_1091882	Ptegra1_602109	Schco3_2671386	IPR001155::DH:flavin oxidoreductase/DH oxidase; N-termil::8	IPR013785::Aldolase-type TIM barrel::8									299	NCU08900_Neucr AN6167_Aspnid	Uncharacterized ORF Has domains with predicted FMN binding; catalytic activity; oxidoreductase activity and role in oxidation-reduction process
Cons_CM-specific	orbh_3155	0	2	2	4	2	1	2	1	2	8	6	0.75	-	Agabi_varbisH97_2_188820	Armosto1_269706	Auramp1_545856	Copci_AmutBmut1_363313		Mk_00183700	PleosPC15_2_1060211	Ptegra1_565630	Schco3_2629384	IPR003100::PAZ domain::8	IPR036085::PAZ domain superfamily::8	IPR032474::Protein argoute; N-termil::8	IPR003165::Piwi domain::8	IPR036397::Ribonuclease H superfamily::8	IPR012337::Ribonuclease H-like superfamily::8	IPR014811::Argoute; linker 1 domain::8	IPR032472::Argoute linker 2 domain::5			72
Cons_CM-specific	orbh_3521	0	2	4	1	2	1	2	2	2	8	6	0.75	-	Agabi_varbisH97_2_117609	Armosto1_250218	Auramp1_23314	Copci_AmutBmut1_411302		Mk_00715400	PleosPC15_2_1104243	Ptegra1_547265	Schco3_2510441	IPR036416::Peptidyl-tR hydrolase superfamily::8	IPR001328::Peptidyl-tR hydrolase::8	IPR018171::Peptidyl-tR hydrolase; conserved site::8								190
Cons_CM-specific	orbh_3543	0	2	2	2	1	2	1	2	4	8	6	0.75	-	Agabi_varbisH97_2_119265	Armosto1_271311	Auramp1_483129	Copci_AmutBmut1_421431		Mk_00518400	PleosPC15_2_1045569	Ptegra1_565591	Schco3_1038712											75
Cons_CM-specific	orbh_3578	0	2	2	1	2	1	2	2	4	8	6	0.75	-	Agabi_varbisH97_2_122303	Armosto1_271303	Auramp1_258514	Copci_AmutBmut1_356204		Mk_00122400	PleosPC15_2_1077289	Ptegra1_504961	Schco3_2605137	IPR014048::Methylated-D-[protein]-cysteine S-methyltransferase; D binding::8	IPR036217::Methylated D-protein cysteine methyltransferase; D binding domain::8	IPR036388::Winged helix-like D-binding domain superfamily::8								312	AN12151_Aspnid atl1_pombe NCU11088_Neucr	Uncharacterized ORF Orthologs have O6-alkylguanine-D binding; damaged D binding activity and role in D dealkylation involved in D repair		alkyltransferase-like protein Atl1
Cons_CM-specific	orbh_3596	0	1	2	2	1	2	2	2	4	8	6	0.75	-	Agabi_varbisH97_2_132587	Armosto1_258736	Auramp1_477697	Copci_AmutBmut1_441821		Mk_00221200	PleosPC15_2_1075581	Ptegra1_574738	Schco3_2644483	IPR011356::Peptidase M17; leucine aminopeptidase/peptidase B::8	IPR000819::Peptidase M17; leucyl aminopeptidase; C-termil::8	IPR043472::Macro domain-like::7	IPR008283::Peptidase M17; leucyl aminopeptidase; N-termil::4	IPR023042::Peptidase M17; leucine aminopeptidase::3						178	SPAC13A11.05_pombe			peptidase family M17 cytoplasmic leucyl aminopeptidase yspII (LAP yspII)
Cons_CM-specific	orbh_3650	0	2	2	1	1	2	2	4	2	8	6	0.75	-	Agabi_varbisH97_2_139357	Armosto1_262411	Auramp1_479990	Copci_AmutBmut1_358323		Mk_01166500	PleosPC15_2_1089194	Ptegra1_243003	Schco3_2622259	IPR036249::Thioredoxin-like superfamily::8	IPR012336::Thioredoxin-like fold::8									367	NCU02547_Neucr
Cons_CM-specific	orbh_3651	0	1	2	2	2	1	2	2	4	8	6	0.75	-	Agabi_varbisH97_2_139429	Armosto1_262343	Auramp1_480214	Copci_AmutBmut1_494276		Mk_00117600	PleosPC15_2_1055720	Ptegra1_589449	Schco3_2622530	IPR033034::DH dehydrogese [ubiquinone] 1 beta subcomplex subunit 9::8	IPR008011::Complex 1 LYR protein::7									359	NCU11258_Neucr AN3467_Aspnid	Uncharacterized ORF
Cons_CM-specific	orbh_3663	0	2	2	1	2	2	2	4	1	8	6	0.75	-	Agabi_varbisH97_2_145185	Armosto1_262408	Auramp1_507518	Copci_AmutBmut1_194035		Mk_00600900	PleosPC15_2_1019974	Ptegra1_605057	Schco3_2049043	IPR032675::Leucine-rich repeat domain superfamily::3										83
Cons_CM-specific	orbh_3710	0	1	4	2	2	1	2	2	2	8	6	0.75	-	Agabi_varbisH97_2_176155	Armosto1_268364	Auramp1_505882	Copci_AmutBmut1_360301		Mk_00795000	PleosPC15_2_155543	Ptegra1_559841	Schco3_2612178	IPR011990::Tetratricopeptide-like helical domain superfamily::1										76
Cons_CM-specific	orbh_3781	0	1	2	2	4	2	1	2	2	8	6	0.75	-	Agabi_varbisH97_2_181422	Armosto1_260973	Auramp1_616231	Copci_AmutBmut1_497512		Mk_00777800	PleosPC15_2_49989	Ptegra1_558708	Schco3_2619033	IPR036770::Ankyrin repeat-containing domain superfamily::6	IPR020683::Ankyrin repeat-containing domain::6	IPR002110::Ankyrin repeat::6								184	NCU08603_Neucr
Cons_CM-specific	orbh_3850	0	1	2	2	1	2	4	2	2	8	6	0.75	-	Agabi_varbisH97_2_184937	Armosto1_251556	Auramp1_544786	Copci_AmutBmut1_458530		Mk_00614400	PleosPC15_2_1065679	Ptegra1_572080	Schco3_2685061	IPR036291::D(P)-binding domain superfamily::8	IPR013968::Polyketide synthase; ketoreductase domain::3									139	AN4726_Aspnid	Uncharacterized ORF Has domains with predicted oxidoreductase activity and role in metabolic process
Cons_CM-specific	orbh_3873	0	1	2	2	1	2	2	2	4	8	6	0.75	-	Agabi_varbisH97_2_186458	Armosto1_270839	Auramp1_629874	Copci_AmutBmut1_467343		Mk_00910500	PleosPC15_2_32134	Ptegra1_573360	Schco3_1212457	IPR011990::Tetratricopeptide-like helical domain superfamily::8	IPR013026::Tetratricopeptide repeat-containing domain::8	IPR001810::F-box domain::8	IPR036047::F-box-like domain superfamily::8	IPR032675::Leucine-rich repeat domain superfamily::7	IPR019734::Tetratricopeptide repeat::5					83
Cons_CM-specific	orbh_3923	0	2	2	2	1	1	2	4	2	8	6	0.75	-	Agabi_varbisH97_2_189220	Armosto1_264154	Auramp1_163531	Copci_AmutBmut1_465602		Mk_00438700	PleosPC15_2_1034457	Ptegra1_646911	Schco3_1190456	IPR018376::Enoyl-CoA hydratase/isomerase; conserved site::8	IPR029045::ClpP/crotose-like domain superfamily::8	IPR001753::Enoyl-CoA hydratase/isomerase::8	IPR014748::Enoyl-CoA hydratase; C-termil::2							341	NCU06960_Neucr AN10764_Aspnid	Uncharacterized ORF Orthologs have role in N-triacetylfusarinine C biosynthetic process; cellular response to hydrogen peroxide; cellular response to iron ion starvation; ergosterol biosynthetic process; pathogenesis and peroxisome localization
Cons_CM-specific	orbh_3935	0	2	2	2	1	1	2	2	4	8	6	0.75	-	Agabi_varbisH97_2_189413	Armosto1_269026	Auramp1_556057	Copci_AmutBmut1_538710		Mk_01296400	PleosPC15_2_1111664	Ptegra1_605858	Schco3_2529046	IPR000270::PB1 domain::8										72
Cons_CM-specific	orbh_3942	0	2	2	2	1	2	1	4	2	8	6	0.75	-	Agabi_varbisH97_2_189490	Armosto1_268970	Auramp1_485917	Copci_AmutBmut1_484746		Mk_01261800	PleosPC15_2_1092494	Ptegra1_609897	Schco3_2610138											103
Cons_CM-specific	orbh_3976	0	2	2	1	1	2	2	2	4	8	6	0.75	-	Agabi_varbisH97_2_190271	Armosto1_261750	Auramp1_569735	Copci_AmutBmut1_410203		Mk_01209800	PleosPC15_2_1031274	Ptegra1_520596	Schco3_1119300	IPR015943::WD40/YVTN repeat-like-containing domain superfamily::7	IPR001680::WD40 repeat::6	IPR036322::WD40-repeat-containing domain superfamily::6	IPR042453::WD repeat-containing protein 53::5							100
Cons_CM-specific	orbh_3978	0	2	4	2	1	1	2	2	2	8	6	0.75	-	Agabi_varbisH97_2_190318	Armosto1_269589	Auramp1_50557	Copci_AmutBmut1_327746		Mk_01054000	PleosPC15_2_1110559	Ptegra1_655120	Schco3_2682531	IPR013169::mR splicing factor Cwf18-like::8										227	cwf18_pombe			complexed with Cdc5 protein Cwf18
Cons_CM-specific	orbh_3980	0	2	4	1	1	2	2	2	2	8	6	0.75	-	Agabi_varbisH97_2_190322	Armosto1_258231	Auramp1_423358	Copci_AmutBmut1_360506		Mk_01051800	PleosPC15_2_1033864	Ptegra1_565035	Schco3_2644511	IPR033468::Metaxin; glutathione S-transferase domain::8	IPR036282::Glutathione S-transferase; C-termil domain superfamily::6									95
Cons_CM-specific	orbh_4020	0	2	2	4	1	1	2	2	2	8	6	0.75	-	Agabi_varbisH97_2_191253	Armosto1_253072	Auramp1_491539	Copci_AmutBmut1_538995		Mk_00371100	PleosPC15_2_1090303	Ptegra1_602327	Schco3_2627563	IPR013026::Tetratricopeptide repeat-containing domain::8	IPR011990::Tetratricopeptide-like helical domain superfamily::8	IPR019734::Tetratricopeptide repeat::6								122
Cons_CM-specific	orbh_4034	0	2	4	2	1	1	2	2	2	8	6	0.75	-	Agabi_varbisH97_2_191574	Armosto1_253341	Auramp1_492193	Copci_AmutBmut1_276202		Mk_00031500	PleosPC15_2_1047621	Ptegra1_571475	Schco3_2642599	IPR002893::Zinc finger; MYND-type::8										100
Cons_CM-specific	orbh_4037	0	1	4	2	1	2	2	2	2	8	6	0.75	-	Agabi_varbisH97_2_191596	Armosto1_261469	Auramp1_565407	Copci_AmutBmut1_447892		Mk_00051900	PleosPC15_2_1088888	Ptegra1_594255	Schco3_2276425											71
Cons_CM-specific	orbh_4048	0	2	4	2	1	2	2	1	2	8	6	0.75	-	Agabi_varbisH97_2_191779	Armosto1_261888	Auramp1_395225	Copci_AmutBmut1_355416		Mk_00094400	PleosPC15_2_1092880	Ptegra1_560634	Schco3_2622710											75
Cons_CM-specific	orbh_4096	0	2	2	4	1	1	2	2	2	8	6	0.75	-	Agabi_varbisH97_2_192899	Armosto1_251012	Auramp1_392676	Copci_AmutBmut1_494836		Mk_00420100	PleosPC15_2_1041962	Ptegra1_587622	Schco3_2702754	IPR019261::Domain of unknown function DUF2263::8	IPR012664::Conserved hypothetical protein CHP02452::8	IPR043472::Macro domain-like::8								94
Cons_CM-specific	orbh_4123	0	1	1	4	2	2	2	2	2	8	6	0.75	-	Agabi_varbisH97_2_193700	Armosto1_270980	Auramp1_547672	Copci_AmutBmut1_486268		Mk_00916600	PleosPC15_2_1090098	Ptegra1_530587	Schco3_2616871	IPR032805::Wax synthase domain::8										101
Cons_CM-specific	orbh_4127	0	2	2	2	1	1	4	2	2	8	6	0.75	-	Agabi_varbisH97_2_193755	Armosto1_271100	Auramp1_502759	Copci_AmutBmut1_356261		Mk_00346700	PleosPC15_2_176677	Ptegra1_348348	Schco3_2614871											81
Cons_CM-specific	orbh_4172	0	1	2	2	1	2	4	2	2	8	6	0.75	-	Agabi_varbisH97_2_194845	Armosto1_254076	Auramp1_187528	Copci_AmutBmut1_62000		Mk_00219800	PleosPC15_2_1051794	Ptegra1_565400	Schco3_2646148	IPR002539::MaoC-like dehydratase domain::8	IPR029069::HotDog domain superfamily::8									314	NCU09138_Neucr AN2577_Aspnid	Uncharacterized ORF Orthologs have glyoxysome localization
Cons_CM-specific	orbh_4178	0	2	2	2	1	1	2	2	4	8	6	0.75	-	Agabi_varbisH97_2_194883	Armosto1_254005	Auramp1_572701	Copci_AmutBmut1_496991		Mk_01369800	PleosPC15_2_164825	Ptegra1_202588	Schco3_2482848											72
Cons_CM-specific	orbh_4194	0	2	4	1	1	2	2	2	2	8	6	0.75	-	Agabi_varbisH97_2_195265	Armosto1_252674	Auramp1_511114	Copci_AmutBmut1_500546		Mk_01067700	PleosPC15_2_1098109	Ptegra1_606872	Schco3_2602944											2
Cons_CM-specific	orbh_4231	0	2	2	1	1	2	2	2	4	8	6	0.75	-	Agabi_varbisH97_2_196143	Armosto1_256012	Auramp1_575908	Copci_AmutBmut1_440599		Mk_00543500	PleosPC15_2_1098129	Ptegra1_584571	Schco3_2641623	IPR005103::Glycoside hydrolase; family 61::8										58
Cons_CM-specific	orbh_4254	0	2	2	2	1	2	4	2	1	8	6	0.75	-	Agabi_varbisH97_2_197250	Armosto1_268148	Auramp1_461489	Copci_AmutBmut1_472280		Mk_00823900	PleosPC15_2_173069	Ptegra1_549347	Schco3_2488254	IPR038887::Dehydrodolichyl diphosphate synthase complex subunit Nus1::7	IPR036424::Decaprenyl diphosphate synthase-like superfamily::7									67
Cons_CM-specific	orbh_4334	0	2	2	2	1	2	2	1	4	8	6	0.75	-	Agabi_varbisH97_2_204264	Armosto1_251033	Auramp1_388142	Copci_AmutBmut1_356544		Mk_00663500	PleosPC15_2_1056428	Ptegra1_562985	Schco3_2445763	IPR002553::Clathrin/coatomer adaptor; adaptin-like; N-termil::1	IPR011989::Armadillo-like helical::1	IPR016024::Armadillo-type fold::1								96
Cons_CM-specific	orbh_4431	0	1	2	2	2	2	4	2	1	8	6	0.75	-	Agabi_varbisH97_2_212517	Armosto1_255668	Auramp1_395349	Copci_AmutBmut1_499916		Mk_00711200	PleosPC15_2_1096427	Ptegra1_550145	Schco3_2622448	IPR036291::D(P)-binding domain superfamily::8	IPR016040::D(P)-binding domain::4									184
Cons_CM-specific	orbh_4562	0	1	2	2	1	2	2	2	4	8	6	0.75	-	Agabi_varbisH97_2_55815	Armosto1_250694	Auramp1_448201	Copci_AmutBmut1_361729		Mk_00649500	PleosPC15_2_16649	Ptegra1_562360	Schco3_2634489	IPR034751::Yippee domain::8	IPR004910::Yippee/Mis18/Cereblon::7	IPR039058::Yippee family::6								48	SPAPJ691.02_pombe			yippee-like protein
Cons_CM-specific	orbh_4662	0	2	1	2	2	2	2	4	1	8	6	0.75	-	Agabi_varbisH97_2_74961	Armosto1_263267	Auramp1_551077	Copci_AmutBmut1_391153		Mk_00590100	PleosPC15_2_1050844	Ptegra1_503870	Schco3_2671203	IPR029063::S-adenosyl-L-methionine-dependent methyltransferase::8	IPR024160::Bin3-type S-adenosyl-L-methionine binding domain::8	IPR039772::R methyltransferase Bin3-like::8	IPR010675::R methyltransferase bin3; C-termil::8	IPR025714::Methyltransferase domain::2	IPR013216::Methyltransferase type 11::2					116
Cons_CM-specific	orbh_4779	0	1	2	2	2	1	4	2	2	8	6	0.75	-	Agabi_varbisH97_2_188287	Armosto1_257656	Auramp1_449242	Copci_AmutBmut1_130255		Mk_00941600	PleosPC15_2_30924	Ptegra1_613337	Schco3_2644281	IPR036291::D(P)-binding domain superfamily::8	IPR002347::Short-chain dehydrogese/reductase SDR::8									216	AN2715_Aspnid	Uncharacterized ORF Has domains with predicted oxidoreductase activity and role in metabolic process
Cons_CM-specific	orbh_5021	0	1	2	4	2	1	2	2	2	8	6	0.75	-	Agabi_varbisH97_2_195203	Armosto1_268267	Auramp1_548326	Copci_AmutBmut1_265056		Mk_00766600	PleosPC15_2_1111266	Ptegra1_600358	Schco3_2645324											218	NCU09193_Neucr
Cons_CM-specific	orbh_5055	0	1	1	4	2	2	2	2	2	8	6	0.75	-	Agabi_varbisH97_2_194290	Armosto1_251696	Auramp1_57735	Copci_AmutBmut1_441335		Mk_00440500	PleosPC15_2_1095722	Ptegra1_566028	Schco3_1175615	IPR013083::Zinc finger; RING/FYVE/PHD-type::1	IPR011011::Zinc finger; FYVE/PHD-type::1									84
Cons_CM-specific	orbh_5135	0	2	2	1	1	2	2	2	4	8	6	0.75	-	Agabi_varbisH97_2_196238	Armosto1_251512	Auramp1_480985	Copci_AmutBmut1_544957		Mk_01258400	PleosPC15_2_1098865	Ptegra1_565572	Schco3_2623205											3
Cons_CM-specific	orbh_5142	0	1	4	2	2	1	2	2	2	8	6	0.75	-	Agabi_varbisH97_2_190114	Armosto1_264564	Auramp1_556353	Copci_AmutBmut1_428039		Mk_01251900	PleosPC15_2_1111157	Ptegra1_158203	Schco3_2496732											61
Cons_CM-specific	orbh_5317	0	2	2	0	1	2	2	4	2	7	6	0.857143	-	Agabi_varbisH97_2_182943	Armosto1_255569	Auramp1_572794	Copci_AmutBmut1_461904			PleosPC15_2_1110388	Ptegra1_8219	Schco3_2482860											39
Cons_CM-specific	orbh_5447	0	1	0	2	2	2	2	4	2	7	6	0.857143	-	Agabi_varbisH97_2_195472	Armosto1_252381	Auramp1_505252	Copci_AmutBmut1_428365		Mk_00117400		Ptegra1_608193	Schco3_2692011											198	NCU00537_Neucr AN1451_Aspnid	Uncharacterized ORF
Cons_CM-specific	orbh_5511	0	0	4	2	2	2	1	2	2	7	6	0.857143	-	Agabi_varbisH97_2_208635	Armosto1_263317	Auramp1_141107	Copci_AmutBmut1_204903		Mk_00583700	PleosPC15_2_1013638		Schco3_2638632											88
Cons_CM-specific	orbh_5593	0	1	2	0	4	2	2	2	2	7	6	0.857143	-	Agabi_varbisH97_2_75156	Armosto1_259625	Auramp1_590348	Copci_AmutBmut1_504216			PleosPC15_2_1078988	Ptegra1_504010	Schco3_2632233	IPR036525::Tubulin/FtsZ; GTPase domain superfamily::7	IPR019605::Misato Segment II tubulin-like domain::6	IPR029209::DML1/Misato; tubulin domain::5	IPR013838::Beta tubulin; autoregulation binding site::5							209	dml1_Aspnig			mitochondrial inheritance GTPase; tubulin-like (predicted)
Cons_CM-specific	orbh_5670	0	2	2	2	1	2	4	0	2	7	6	0.857143	-		Armosto1_257312	Auramp1_547342	Copci_AmutBmut1_503550		Mk_00317800	PleosPC15_2_1090466	Ptegra1_552383	Schco3_2626459	IPR013256::Chromatin SPT2::6										90
Cons_CM-specific	orbh_5768	0	1	4	2	2	2	2	0	2	7	6	0.857143	-		Armosto1_267272	Auramp1_396909	Copci_AmutBmut1_439078		Mk_00319900	PleosPC15_2_1061641	Ptegra1_610811	Schco3_2640522	IPR039960::MDM10-complementing protein 1::7	IPR034804::Fumarate reductase/succite dehydrogese; transmembrane subunit::7	IPR012472::Domain of unknown function DUF1691::3								119
Cons_CM-specific	orbh_5810	0	2	2	0	1	2	4	2	2	7	6	0.857143	-	Agabi_varbisH97_2_179431	Armosto1_271230	Auramp1_573180	Copci_AmutBmut1_374632			PleosPC15_2_1106608	Ptegra1_126890	Schco3_2553826											24
Cons_CM-specific	orbh_5827	0	2	2	4	1	2	2	0	2	7	6	0.857143	-		Armosto1_250563	Auramp1_22128	Copci_AmutBmut1_412708		Mk_00685300	PleosPC15_2_1041207	Ptegra1_571914	Schco3_2549345	IPR029146::CST complex subunit Ten1; animal and plant type::2										63
Cons_CM-specific	orbh_5911	0	2	2	0	2	1	2	2	4	7	6	0.857143	-	Agabi_varbisH97_2_69774	Armosto1_250792	Auramp1_473445	Copci_AmutBmut1_485298			PleosPC15_2_158123	Ptegra1_654271	Schco3_2508078											85
Cons_CM-specific	orbh_5940	0	0	2	2	1	2	4	2	2	7	6	0.857143	-	Agabi_varbisH97_2_179291	Armosto1_271174	Auramp1_167509	Copci_AmutBmut1_94143		Mk_00932900	PleosPC15_2_1106839		Schco3_2506521	IPR000571::Zinc finger; CCCH-type::7	IPR036855::Zinc finger; CCCH-type superfamily::7									13
Cons_CM-specific	orbh_66251	0	1	2	2	2	2	4	0	2	7	6	0.857143	-		Armosto1_268407	Auramp1_487754	Copci_AmutBmut1_357221		Mk_00795900	PleosPC15_2_1008820	Ptegra1_559955	Schco3_2488479	IPR011701::Major facilitator superfamily::7	IPR020846::Major facilitator superfamily domain::7	IPR036259::MFS transporter superfamily::7								118
Cons_CM-specific	orbh_66492	0	0	2	2	2	2	2	1	4	7	6	0.857143	-	Agabi_varbisH97_2_190539	Armosto1_257928	Auramp1_514295	Copci_AmutBmut1_374102		Mk_01222900	PleosPC15_2_1110467		Schco3_2605913	IPR016143::Citrate synthase-like; small alpha subdomain::7	IPR002020::Citrate synthase::7	IPR036969::Citrate synthase superfamily::7	IPR019810::Citrate synthase active site::7	IPR016142::Citrate synthase-like; large alpha subdomain::7	IPR010109::Citrate synthase; eukaryotic-type::4					295	tca-2_Neucr
Cons_CM-specific	orbh_6191	0	2	2	2	0	0	2	2	4	6	6	1	-	Agabi_varbisH97_2_223732	Armosto1_251699		Copci_AmutBmut1_472999		Mk_00440900	PleosPC15_2_1088162	Ptegra1_582164												95
Cons_CM-specific	orbh_1598	1	1	2	2	2	2	2	2	1	9	6	0.75	-	Agabi_varbisH97_2_193639	Armosto1_271199	Auramp1_504638	Copci_AmutBmut1_443347	Cryne_JEC21_1_3449	Mk_00312100	PleosPC15_2_1044577	Ptegra1_505631	Schco3_2533883	IPR006939::SNF5/SMARCB1/INI1::9										339	YLR321C_SFH1_Sacce1 NCU07893_Neucr sfh1_pombe			RSC complex subunit Sfh1	Component of the RSC chromatin remodeling complex; essential gene required for cell cycle progression and maintence of proper ploidy; phosphorylated in the G1 phase of the cell cycle; Snf5p paralog
Cons_CM-specific	orbh_1927	1	2	2	2	2	1	1	2	2	9	6	0.75	-	Agabi_varbisH97_2_197624	Armosto1_268870	Auramp1_397681	Copci_AmutBmut1_450917	Cryne_JEC21_1_6298	Mk_00777900	PleosPC15_2_1111423	Ptegra1_559745	Schco3_2609938	IPR005570::R polymerase; Rpb8::9	IPR012340::Nucleic acid-binding; OB-fold::9									411	rpb8_pombe YOR224C_RPB8_Sacce1 NCU08030_Neucr AN0192_Aspnid	Uncharacterized ORF Putative R polymerase subunit 8 <IS. cerevisiae</I ortholog Rpb8p has D-directed R polymerase activity expression reduced after exposure to farnesol		D-directed R polymerase I; II and III subunit Rpb8	R polymerase subunit ABC14.5; common to R polymerases I; II; and III
Cons_CM-specific	orbh_2562	1	2	2	2	1	1	2	2	2	9	6	0.75	-	Agabi_varbisH97_2_222582	Armosto1_258964	Auramp1_573008	Copci_AmutBmut1_464929	Cryne_JEC21_1_945	Mk_00870400	PleosPC15_2_1113648	Ptegra1_24249	Schco3_2642137	IPR001370::BIR repeat::9										9
Cons_CM-specific	orbh_2807	1	2	2	2	1	2	2	1	2	9	6	0.75	-	Agabi_varbisH97_2_64665	Armosto1_258042	Auramp1_49629	Copci_AmutBmut1_451793	Cryne_JEC21_1_127	Mk_01204500	PleosPC15_2_1105395	Ptegra1_533287	Schco3_1086349	IPR000504::R recognition motif domain::9	IPR012677::Nucleotide-binding alpha-beta plait domain superfamily::9	IPR035979::R-binding domain superfamily::9								348	SPBC428.12c_pombe NCU06739_Neucr AN6256_Aspnid	Uncharacterized ORF Has domains with predicted nucleic acid binding; nucleotide binding activity		peptidyl-prolyl cis-trans isomerase E (predicted)
Cons_CM-specific	orbh_3153	1	1	2	2	2	1	2	2	2	9	6	0.75	-	Agabi_varbisH97_2_114318	Armosto1_269564	Auramp1_42546	Copci_AmutBmut1_357231	Cryne_JEC21_1_699	Mk_00772600	PleosPC15_2_1111282	Ptegra1_647629	Schco3_2140343	IPR027417::P-loop containing nucleoside triphosphate hydrolase::9	IPR041664::Orc1-like; AAA ATPase domain::8	IPR000719::Protein kise domain::8	IPR003018::GAF domain::8	IPR011009::Protein kise-like domain superfamily::8	IPR029016::GAF-like domain superfamily::8	IPR003661::Sigl transduction histidine kise; dimerisation/phosphoacceptor domain::7	IPR005467::Histidine kise domain::7	IPR001789::Sigl transduction response regulator; receiver domain::7	IPR003594::Histidine kise/HSP90-like ATPase::7	274	NCU01823_Neucr
Cons_CM-specific	orbh_3270	1	1	2	2	2	2	1	2	2	9	6	0.75	-	Agabi_varbisH97_2_151998	Armosto1_271090	Auramp1_401556	Copci_AmutBmut1_367023	Cryne_JEC21_1_5161	Mk_00903000	PleosPC15_2_1046018	Ptegra1_507902	Schco3_2616059	IPR033469::CYTH-like domain superfamily::9	IPR004206::mR triphosphatase Cet1-like::9	IPR037009::mR triphosphatase Cet1-like superfamily::9	IPR040343::R 5'-triphosphatase Cet1/Ctl1::9							226	pct1_pombe CET1_cryptococcus			R 5prime-triphosphatase	R 5-triphosphatase involved in mR 5 capping; subunit of the mR capping enzyme; which is a heterotetramer composed of a Cet1p homodimer and two molecules of the guanylyltransferase Ceg1p; Cet1p also has a role in regulation of R pol II pausing at promoter-proximal sites; interaction between Cet1p and Ceg1p is required for Ceg1p nuclear import; mammalian enzyme is a single bifunctiol polypeptide; C…
Cons_CM-specific	orbh_331	1	2	2	2	1	2	2	2	1	9	6	0.75	-	Agabi_varbisH97_2_137425	Armosto1_271020	Auramp1_493828	Copci_AmutBmut1_466778	Cryne_JEC21_1_1428	Mk_00913900	PleosPC15_2_51893	Ptegra1_507817	Schco3_2615964	IPR013783::Immunoglobulin-like fold::9	IPR008962::PapD-like superfamily::9	IPR000535::Major sperm protein (MSP) domain::9	IPR016763::Vesicle-associated membrane-protein-associated protein::9							73
Cons_CM-specific	orbh_959	1	1	2	2	2	1	2	2	2	9	6	0.75	-	Agabi_varbisH97_2_188186	Armosto1_258013	Auramp1_515098	Copci_AmutBmut1_503638	Cryne_JEC21_1_2002	Mk_00425300	PleosPC15_2_1094745	Ptegra1_574141	Schco3_2555606	IPR035985::Ubiquitin-activating enzyme::9	IPR030667::NEDD8-activating enzyme E1 regulatory subunit APP-BP1::9	IPR000594::THIF-type D/FAD binding fold::9								412	NCU08040_Neucr YPL003W_ULA1_Sacce1 AN2441_ulaA_Aspnid uba5_pombe	Uncharacterized ORF Putative E1 NeddH/Nedd8-activating enzyme		NEDD8 activating enzyme E1-type Uba5 (predicted)	Protein that activates Rub1p (NEDD8) before neddylation; acts together with Uba3p; may play a role in protein degradation
Cons_CM-specific	orbh_3487	0	2	2	2	1	2	2	2	1	8	6	0.75	-	Agabi_varbisH97_2_115148	Armosto1_257993	Auramp1_539915	Copci_AmutBmut1_354269		Mk_01201500	PleosPC15_2_1099254	Ptegra1_520585	Schco3_2562968	IPR032675::Leucine-rich repeat domain superfamily::8										12
Cons_CM-specific	orbh_3523	0	2	2	2	1	1	2	2	2	8	6	0.75	-	Agabi_varbisH97_2_117711	Armosto1_250533	Auramp1_589973	Copci_AmutBmut1_38547		Mk_00701800	PleosPC15_2_1104365	Ptegra1_567208	Schco3_2634301	IPR036908::RlpA-like domain superfamily::8	IPR007112::Expansin/pollen allergen; DPBB domain::6									122
Cons_CM-specific	orbh_3574	0	2	2	2	2	1	2	2	1	8	6	0.75	-	Agabi_varbisH97_2_121965	Armosto1_270574	Auramp1_400139	Copci_AmutBmut1_107170		Mk_00760200	PleosPC15_2_50666	Ptegra1_604448	Schco3_2688940	IPR011856::tR endonuclease-like domain superfamily::8	IPR036167::tR intron endonuclease; catalytic domain-like superfamily::8	IPR018593::tR-splicing endonuclease subunit Sen15::8								119	sen15_pombe			tR-splicing endonuclease subunit Sen15 (predicted)
Cons_CM-specific	orbh_3664	0	2	2	2	1	1	2	2	2	8	6	0.75	-	Agabi_varbisH97_2_145957	Armosto1_257331	Auramp1_183122	Copci_AmutBmut1_492774		Mk_00507400	PleosPC15_2_1094733	Ptegra1_569644	Schco3_2641559											277	AN12094_Aspnid NCU00253_Neucr	Uncharacterized ORF
Cons_CM-specific	orbh_3745	0	2	2	2	1	1	2	2	2	8	6	0.75	-	Agabi_varbisH97_2_178864	Armosto1_265167	Auramp1_567525	Copci_AmutBmut1_423744		Mk_01077000	PleosPC15_2_30777	Ptegra1_580446	Schco3_1284934	IPR000719::Protein kise domain::8	IPR008271::Serine/threonine-protein kise; active site::8	IPR011009::Protein kise-like domain superfamily::8	IPR017441::Protein kise; ATP binding site::8	IPR002219::Protein kise C-like; phorbol ester/diacylglycerol-binding domain::7	IPR036872::CH domain superfamily::7	IPR001715::Calponin homology domain::6	IPR003096::Smooth muscle protein/calponin::4	IPR001245::Serine-threonine/tyrosine-protein kise; catalytic domain::2		76
Cons_CM-specific	orbh_3922	0	2	2	2	1	1	2	2	2	8	6	0.75	-	Agabi_varbisH97_2_189216	Armosto1_264928	Auramp1_404906	Copci_AmutBmut1_465607		Mk_00058500	PleosPC15_2_1111916	Ptegra1_591175	Schco3_2614287	IPR013174::Dolichol-phosphate mannosyltransferase subunit 3::8										320	AN6992_Aspnid NCU05544_Neucr	Uncharacterized ORF Orthologs have dolichyl-phosphate beta-D-mannosyltransferase activity and role in dolichol-linked oligosaccharide biosynthetic process; fungal-type cell wall biogenesis; protein N-linked glycosylation; protein O-linked glycosylation
Cons_CM-specific	orbh_4119	0	2	2	2	1	1	2	2	2	8	6	0.75	-	Agabi_varbisH97_2_193654	Armosto1_271091	Auramp1_583318	Copci_AmutBmut1_464279		Mk_00244700	PleosPC15_2_160474	Ptegra1_592031	Schco3_2616008											85
Cons_CM-specific	orbh_4188	0	2	2	2	1	1	2	2	2	8	6	0.75	-	Agabi_varbisH97_2_195120	Armosto1_254267	Auramp1_495603	Copci_AmutBmut1_129266		Mk_01165000	PleosPC15_2_1090636	Ptegra1_570507	Schco3_2639468											72
Cons_CM-specific	orbh_4339	0	1	2	1	2	2	2	2	2	8	6	0.75	-	Agabi_varbisH97_2_204867	Armosto1_250871	Auramp1_473121	Copci_AmutBmut1_469299		Mk_00677400	PleosPC15_2_1104295	Ptegra1_648182	Schco3_2631483	IPR036770::Ankyrin repeat-containing domain superfamily::4	IPR036361::SAP domain superfamily::1									286	NCU04042_Neucr
Cons_CM-specific	orbh_4547	0	1	2	2	2	2	2	1	2	8	6	0.75	-	Agabi_varbisH97_2_228041	Armosto1_252449	Auramp1_573020	Copci_AmutBmut1_379296		Mk_00353500	PleosPC15_2_1049000	Ptegra1_525392	Schco3_2642185	IPR002123::Phospholipid/glycerol acyltransferase::8										58
Cons_CM-specific	orbh_4567	0	2	2	1	1	2	2	2	2	8	6	0.75	-	Agabi_varbisH97_2_60661	Armosto1_268402	Auramp1_505974	Copci_AmutBmut1_472621		Mk_00799300	PleosPC15_2_1036992	Ptegra1_588937	Schco3_2612094	IPR005024::Snf7 family::8										390	AN1365_vps20_Aspnid NCU10430_Neucr vps20_pombe	Uncharacterized ORF Putative ESCRT III complex with a predicted role in intralumel vesicle formation and late endosome to vacuole transport required for trafficking from the membrane to the vacuoles essential for pH sigling		ESCRT III complex subunit Vps20
Cons_CM-specific	orbh_4751	0	2	2	1	2	2	2	1	2	8	6	0.75	-	Agabi_varbisH97_2_120055	Armosto1_253490	Auramp1_484209	Copci_AmutBmut1_77839		Mk_00265500	PleosPC15_2_1098722	Ptegra1_606113	Schco3_2628798											75
Cons_CM-specific	orbh_5012	0	1	2	2	2	2	2	1	2	8	6	0.75	-	Agabi_varbisH97_2_148367	Armosto1_255554	Auramp1_508696	Copci_AmutBmut1_112842		Mk_00620500	PleosPC15_2_1087650	Ptegra1_557505	Schco3_2039709	IPR001452::SH3 domain::8	IPR036028::SH3-like domain superfamily::8	IPR035521::Fus1; SH3 domain::4								24
Cons_CM-specific	orbh_5201	0	2	0	2	2	1	2	2	2	7	6	0.857143	-	Agabi_varbisH97_2_115272	Armosto1_266807	Auramp1_52879	Copci_AmutBmut1_485892		Mk_01059800		Ptegra1_652599	Schco3_2710127											1
Cons_CM-specific	orbh_5437	0	2	2	2	2	1	0	2	2	7	6	0.857143	-	Agabi_varbisH97_2_194822		Auramp1_484695	Copci_AmutBmut1_354806		Mk_01330100	PleosPC15_2_42887	Ptegra1_572431	Schco3_2628139	IPR031463::MICOS complex subunit Mic12::2										76
Cons_CM-specific	orbh_5962	0	2	2	0	2	2	1	2	2	7	6	0.857143	-	Agabi_varbisH97_2_121801	Armosto1_271867	Auramp1_569218	Copci_AmutBmut1_372371			PleosPC15_2_1090596	Ptegra1_603205	Schco3_2639355	IPR007648::Mitochondrial ATPase inhibitor::7										85
Cons_Shared	orbh_1521	4	2	2	4	4	4	4	2	4	9	8	1	-	Agabi_varbisH97_2_192887	Armosto1_258125	Auramp1_3133	Copci_AmutBmut1_374148	Cryne_JEC21_1_4442	Mk_01410600	PleosPC15_2_1056786	Ptegra1_599730	Schco3_2630802	IPR023395::Mitochondrial carrier domain superfamily::9	IPR018108::Mitochondrial substrate/solute carrier::9	IPR002067::Mitochondrial carrier protein::9								410	YJR095W_SFC1_Sacce1 AN7287_acuL_Aspnid NCU08561_Neucr	Verified ORF Mitochondrial succite/fumarate antiporter involved in utilization of acetate and other carbon sources			Mitochondrial succite-fumarate transporter; transports succite into and fumarate out of the mitochondrion; required for ethanol and acetate utilization
Cons_Shared	orbh_1623	4	2	2	4	4	4	4	2	2	9	8	1	-	Agabi_varbisH97_2_193793	Armosto1_270785	Auramp1_493401	Copci_AmutBmut1_495730	Cryne_JEC21_1_5714	Mk_00893300	PleosPC15_2_1067024	Ptegra1_548625	Schco3_2615529	IPR006254::Isocitrate lyase::9	IPR040442::Pyruvate kise-like domain superfamily::9	IPR039556::ICL/PEPM domain::9	IPR015813::Pyruvate/Phosphoenolpyruvate kise-like domain superfamily::9	IPR018523::Isocitrate lyase/phosphorylmutase; conserved site::9						413	acuD_Aspnid icl2_pombe ICL1_fusarium YER065C_ICL1_Sacce1 AN5634_acuD_Aspnid	Verified ORF Isocitrate lyase; required for utilization of acetate and fatty acids as carbon sources transcriptiol induction in response to acetate is mediated by FacB transcriptiol induction in response to long-chain fatty acids mediated by FarA			Isocitrate lyase; catalyzes the formation of succite and glyoxylate from isocitrate; a key reaction of the glyoxylate cycle; expression of ICL1 is induced by growth on ethanol and repressed by growth on glucose
Cons_Shared	orbh_1872	4	2	4	2	2	2	4	4	4	9	8	1	-	Agabi_varbisH97_2_196116	Armosto1_255914	Auramp1_508346	Copci_AmutBmut1_500663	Cryne_JEC21_1_5089	Mk_00806400	PleosPC15_2_1090768	Ptegra1_573171	Schco3_2606953	IPR016163::Aldehyde dehydrogese; C-termil::9	IPR015590::Aldehyde dehydrogese domain::9	IPR029510::Aldehyde dehydrogese; glutamic acid active site::9	IPR016160::Aldehyde dehydrogese; cysteine active site::9	IPR016162::Aldehyde dehydrogese; N-termil::9	IPR016161::Aldehyde/histidinol dehydrogese::9					407	YER073W_ALD5_Sacce1 NCU03415_Neucr SPAC9E9.09c_pombe AN0554_aldA_Aspnid aldA_Aspnid YOR374W_ALD4_Sacce1	Verified ORF Aldehyde dehydrogese possible roles in beta-alanine; acetate; acetaldehyde and ethanol metabolism; methylglyoxal bypass; penicillin biosynthesis medione stress-decreased carbon starvation autophagy-induced hypoxia upregulated		aldehyde dehydrogese (predicted)	Mitochondrial aldehyde dehydrogese; required for growth on ethanol and conversion of acetaldehyde to acetate; phosphorylated; activity is K+ dependent; utilizes DP+ or D+ equally as coenzymes; expression is glucose repressed; can substitute for cytosolic DP-dependent aldehyde dehydrogese when directed to the cytosol
Cons_Shared	orbh_3368	4	2	4	4	2	2	4	4	2	9	8	1	-	Agabi_varbisH97_2_116105	Armosto1_257614	Auramp1_455032	Copci_AmutBmut1_497099	Cryne_JEC21_1_56	Mk_00333500	PleosPC15_2_1067387	Ptegra1_652541	Schco3_2625961	IPR036969::Citrate synthase superfamily::9	IPR002020::Citrate synthase::9	IPR016142::Citrate synthase-like; large alpha subdomain::9	IPR010109::Citrate synthase; eukaryotic-type::9	IPR016143::Citrate synthase-like; small alpha subdomain::9	IPR019810::Citrate synthase active site::9					383	citA_Aspnid cit1_pombe YNR001C_CIT1_Sacce1 AN8275_citA_Aspnid	Verified ORF Mitochondrial citrate synthase with a predicted role in the TCA cycle		citrate synthase Cit1	Citrate synthase; catalyzes the condensation of acetyl coenzyme A and oxaloacetate to form citrate; the rate-limiting enzyme of the TCA cycle; nuclear encoded mitochondrial protein; CIT1 has a paralog; CIT2; that arose from the whole genome duplication
Cons_Shared	orbh_1950	4	2	4	2	2	4	2	2	4	9	8	1	-	Agabi_varbisH97_2_198149	Armosto1_268380	Auramp1_549882	Copci_AmutBmut1_360292	Cryne_JEC21_1_5397	Mk_00794400	PleosPC15_2_1054058	Ptegra1_588947	Schco3_2612130	IPR016102::Succinyl-CoA synthetase-like::9	IPR036291::D(P)-binding domain superfamily::9	IPR033847::ATP-citrate lyase/succinyl-CoA ligase; conserved site::9	IPR005810::Succinyl-CoA ligase; alpha subunit::9	IPR005811::ATP-citrate lyase/succinyl-CoA ligase::9	IPR017440::ATP-citrate lyase/succinyl-CoA ligase; active site::9	IPR003781::CoA-binding::9				418	SPAC16E8.17c_pombe AN2295_Aspnid YOR142W_LSC1_Sacce1	Uncharacterized ORF Putative succite-CoA ligase (GDP-forming) with a predicted role in the TCA cycle		succite-CoA ligase alpha subunit (predicted)	Alpha subunit of succinyl-CoA ligase; succinyl-CoA ligase is a mitochondrial enzyme of the TCA cycle that catalyzes the nucleotide-dependent conversion of succinyl-CoA to succite; phosphorylated
Cons_Shared	orbh_2959	4	2	2	2	2	2	2	4	2	9	8	1	-	Agabi_varbisH97_2_76573	Armosto1_266305	Auramp1_465508	Copci_AmutBmut1_147126	Cryne_JEC21_1_665	Mk_00762400	PleosPC15_2_175749	Ptegra1_650808	Schco3_2604210	IPR007248::Mpv17/PMP22::9										373	SYM1_candida SYM1_fusarium YLR251W_SYM1_Sacce1 SYM1_ustilago		Ortholog(s) have role in ethanol metabolic process and mitochondrial inner membrane localization		Protein required for ethanol metabolism; induced by heat shock and localized to the inner mitochondrial membrane; homologous to mammalian peroxisomal membrane protein Mpv17
Cons_Shared	orbh_1003	4	1	4	4	4	4	4	4	4	9	7	0.875	-	Agabi_varbisH97_2_188880	Armosto1_250099	Auramp1_563694	Copci_AmutBmut1_530292	Cryne_JEC21_1_5752	Mk_00708400	PleosPC15_2_1089338	Ptegra1_528250	Schco3_2631920	IPR006252::Malate synthase A::9	IPR001465::Malate synthase::9	IPR011076::Malate synthase-like superfamily::9	IPR019830::Malate synthase; conserved site::8							45
Cons_Shared	orbh_1647	4	1	4	4	2	4	4	4	4	9	7	0.875	-	Agabi_varbisH97_2_194019	Armosto1_264110	Auramp1_538565	Copci_AmutBmut1_375404	Cryne_JEC21_1_941	Mk_01074600	PleosPC15_2_1089311	Ptegra1_534913	Schco3_2617636	IPR020846::Major facilitator superfamily domain::9	IPR036259::MFS transporter superfamily::9	IPR005828::Major facilitator; sugar transporter-like::5	IPR011701::Major facilitator superfamily::4							398	NCU07607_Neucr YKL217W_JEN1_Sacce1 AN6703_jenB_Aspnid	Verified ORF Short-chain carboxylic acid transporter involved in uptake of lactate; succite; pyruvate and malate			Monocarboxylate/proton symporter of the plasma membrane; transport activity is dependent on the pH gradient across the membrane; mediates high-affinity uptake of carbon sources lactate; pyuvate; and acetate; and also of the micronutrient selenite; whose structure mimics that of monocarboxylates; expression and localization are tightly regulated; with transcription repression; mR degradation; and …
Cons_Shared	orbh_3553	4	4	4	0	4	4	4	4	2	8	7	1	-	Agabi_varbisH97_2_119642	Armosto1_270561	Auramp1_67133	Copci_AmutBmut1_534888	Cryne_JEC21_1_1817		PleosPC15_2_160128	Ptegra1_556632	Schco3_1091573	IPR030185::Malic acid transport protein::8	IPR004695::Transporter protein SLAC1/Mae1/ Ssu1/TehA::8	IPR038665::Voltage-dependent anion channel superfamily::7								99	mae1_pombe			plasma membrane malate/succite:proton symporter Mae1
Cons_Shared	orbh_1630	4	1	4	4	2	2	4	4	4	9	7	0.875	-	Agabi_varbisH97_2_193820	Armosto1_270718	Auramp1_489776	Copci_AmutBmut1_422402	Cryne_JEC21_1_901	Mk_00891400	PleosPC15_2_160448	Ptegra1_649465	Schco3_2626643	IPR012000::Thiamine pyrophosphate enzyme; central domain::9	IPR012001::Thiamine pyrophosphate enzyme; N-termil TPP-binding domain::9	IPR029061::Thiamin diphosphate-binding fold::9	IPR029035::DHS-like D/FAD-binding domain superfamily::9	IPR011766::Thiamine pyrophosphate enzyme; C-termil TPP-binding::9	IPR012110::Thiamine pyrophosphate (TPP)-dependent enzyme::8					389	pdcA_Aspnid AN4888_pdcA_Aspnid ilv-5_Neucr YLR044C_PDC1_Sacce1 PDC11_candida SPAC13A11.06_pombe	Verified ORF Putative pyruvate decarboxylase with a predicted role in pyruvate metabolism or penicillin biosynthesis intracellular protein abundance decreased by medione stress		pyruvate decarboxylase (predicted)	Major of three pyruvate decarboxylase isozymes; key enzyme in alcoholic fermentation; decarboxylates pyruvate to acetaldehyde; involved in amino acid catabolism; subject to glucose-; ethanol-; and autoregulation; activated by phosphorylation in response to glucose levels; N-termilly propionylated in vivo
Cons_Shared	orbh_1786	4	2	4	2	1	4	4	4	4	9	7	0.875	-	Agabi_varbisH97_2_195275	Armosto1_255913	Auramp1_520048	Copci_AmutBmut1_441597	Cryne_JEC21_1_5010	Mk_01250600	PleosPC15_2_1090739	Ptegra1_569613	Schco3_2640999	IPR000791::Acetate transporter GPR1/FUN34/SatP family::9										404	YCR010C_ADY2_Sacce1 NCU06043_Neucr AN5226_acpA_Aspnid acpA_Aspnid mug86_pombe	Verified ORF Acetate permease; involved in acetate uptake has similarity to GPR1/FUN34/YaaH family members transcript induced by ethanol		plasma membrane acetate transmembrane transporter (predicted)	Acetate transporter required for normal sporulation; phosphorylated in mitochondria; ADY2 has a paralog; ATO2; that arose from the whole genome duplication
Cons_Shared	orbh_1696	4	2	4	2	2	1	4	2	4	9	7	0.875	-	Agabi_varbisH97_2_194501	Armosto1_256208	Auramp1_507604	Copci_AmutBmut1_442593	Cryne_JEC21_1_886	Mk_00035500	PleosPC15_2_1058547	Ptegra1_573756	Schco3_2636059	IPR005811::ATP-citrate lyase/succinyl-CoA ligase::9	IPR016102::Succinyl-CoA synthetase-like::9	IPR032263::ATP-citrate synthase; citrate-binding domain::9	IPR016143::Citrate synthase-like; small alpha subdomain::9	IPR036969::Citrate synthase superfamily::9	IPR002020::Citrate synthase::9	IPR036291::D(P)-binding domain superfamily::9	IPR033847::ATP-citrate lyase/succinyl-CoA ligase; conserved site::8	IPR017440::ATP-citrate lyase/succinyl-CoA ligase; active site::8	IPR003781::CoA-binding::8	375	SPBC1703.07_pombe AN2436_aclB_Aspnid	Verified ORF Putative ATP citrate synthase with a predicted role in TCA intermediate metabolism transcript downregulated upon shift from glucose to ethanol and after exposure to farnesol		ATP citrate synthase subunit 1 (predicted)
Cons_Shared	orbh_14	4	2	4	2	1	2	2	2	2	9	7	0.875	-	Agabi_varbisH97_2_113903	Armosto1_268994	Auramp1_487148	Copci_AmutBmut1_357888	Cryne_JEC21_1_3135	Mk_01285800	PleosPC15_2_1063060	Ptegra1_564653	Schco3_2490525	IPR018108::Mitochondrial substrate/solute carrier::9	IPR023395::Mitochondrial carrier domain superfamily::9									409	YKL120W_OAC1_Sacce1 NCU07884_Neucr AN0066_Aspnid oac1_pombe	Uncharacterized ORF Orthologs have isopropylmalate transmembrane transporter activity; malote(1-) transmembrane transporter activity; oxaloacetate transmembrane transporter activity; sulfate transmembrane transporter activity		mitochondrial carrier; ocaloacetate family anion (predicted)	Mitochondrial inner membrane transporter; transports oxaloacetate; sulfate; thiosulfate; and isopropylmalate; member of the mitochondrial carrier family
Cons_Shared	orbh_1721	2	1	2	2	2	4	4	4	2	9	7	0.875	-	Agabi_varbisH97_2_194754	Armosto1_256788	Auramp1_396858	Copci_AmutBmut1_500719	Cryne_JEC21_1_753	Mk_00958400	PleosPC15_2_1091136	Ptegra1_497118	Schco3_2628260	IPR042099::AMP-dependent synthetase-like superfamily::9	IPR000873::AMP-dependent synthetase/ligase::9	IPR011904::Acetate-CoA ligase::9	IPR025110::AMP-binding enzyme; C-termil domain::9	IPR020845::AMP-binding; conserved site::9	IPR032387::Acetyl-coenzyme A synthetase; N-termil domain::8					427	SPCC191.02c_pombe AN5626_facA_Aspnid YLR153C_ACS2_Sacce1 facA_Aspnid	Verified ORF Acetyl-CoA synthase; required for utilization of acetate as a carbon source transcriptiol induction by acetate is mediated by FacB carbon catabolite repression is mediated by CreA		acetyl-CoA ligase (predicted)	Acetyl-coA synthetase isoform; along with Acs1p; acetyl-coA synthetase isoform is the nuclear source of acetyl-coA for histone acetylation; mutants affect global transcription; required for growth on glucose; expressed under aerobic conditions
Cons_Shared	orbh_1670	2	1	4	2	2	2	2	2	2	9	7	0.875	-	Agabi_varbisH97_2_194245	Armosto1_251481	Auramp1_71383	Copci_AmutBmut1_369183	Cryne_JEC21_1_2369	Mk_00429300	PleosPC15_2_1053292	Ptegra1_567336	Schco3_2606733	IPR006255::Dihydrolipoamide succinyltransferase::9	IPR003016::2-oxo acid dehydrogese; lipoyl-binding site::9	IPR023213::Chloramphenicol acetyltransferase-like domain superfamily::9	IPR011053::Single hybrid motif::9	IPR000089::Biotin/lipoyl attachment::9	IPR001078::2-oxoacid dehydrogese acyltransferase; catalytic domain::9					421	AN3466_kgdB_Aspnid NCU02438_Neucr kgd2_pombe YDR148C_KGD2_Sacce1	Uncharacterized ORF Putative dihydrolipoamide S-succinyl transferase with a predicted role in the TCA cycle		dihydrolipoamide S-succinyltransferase; e2 component of oxoglutarate dehydrogese complex Kdg2 (predicted)	Dihydrolipoyl transsuccinylase; component of the mitochondrial alpha-ketoglutarate dehydrogese complex; which catalyzes the oxidative decarboxylation of alpha-ketoglutarate to succinyl-CoA in the TCA cycle; phosphorylated
Cons_Shared	orbh_1669	4	1	4	4	4	1	4	4	4	9	6	0.75	-	Agabi_varbisH97_2_194243	Armosto1_251471	Auramp1_494188	Copci_AmutBmut1_273609	Cryne_JEC21_1_2140	Mk_00428400	PleosPC15_2_1035364	Ptegra1_648507	Schco3_1161064	IPR012302::Malic enzyme; D-binding::9	IPR012301::Malic enzyme; N-termil domain::9	IPR001891::Malic oxidoreductase::9	IPR015884::Malic enzyme; conserved site::9	IPR037062::Malic enzyme; N-termil domain superfamily::9	IPR036291::D(P)-binding domain superfamily::9					346	NCU03651_Neucr
Cons_Shared	orbh_2536	4	1	4	2	1	4	4	2	4	9	6	0.75	-	Agabi_varbisH97_2_221237	Armosto1_250757	Auramp1_27203	Copci_AmutBmut1_493553	Cryne_JEC21_1_6393	Mk_00665700	PleosPC15_2_1089535	Ptegra1_501989	Schco3_2625339	IPR008210::Phosphoenolpyruvate carboxykise; N-termil::9	IPR001272::Phosphoenolpyruvate carboxykise; ATP-utilising::9	IPR015994::Phosphoenolpyruvate carboxykise (ATP); conserved site::8	IPR013035::Phosphoenolpyruvate carboxykise; C-termil::8							411	YKR097W_PCK1_Sacce1 acuF_Aspnid AN1918_acuF_Aspnid	Verified ORF Putative phosphoenolpyruvate carboxykise with a predicted role in gluconeogenesis and glycolysis transcriptiolly induced by acetate and after exposure to farnesol			Phosphoenolpyruvate carboxykise; key enzyme in gluconeogenesis; catalyzes early reaction in carbohydrate biosynthesis; glucose represses transcription and accelerates mR degradation; regulated by Mcm1p and Cat8p; located in the cytosol
Cons_Shared	orbh_293	4	1	2	1	2	2	2	4	2	9	6	0.75	-	Agabi_varbisH97_2_135516	Armosto1_261818	Auramp1_479627	Copci_AmutBmut1_474027	Cryne_JEC21_1_1011	Mk_00088100	PleosPC15_2_1064180	Ptegra1_647997	Schco3_2254325	IPR024084::Isopropylmalate dehydrogese-like domain::9	IPR004434::Isocitrate dehydrogese D-dependent::9									408	tca-6_Neucr idh1_pombe YNL037C_IDH1_Sacce1 AN5790_Aspnid	Uncharacterized ORF Putative isocitrate dehydrogese (D+) with a predicted role in the TCA cycle		isocitrate dehydrogese (D+) subunit 1 Idh1	Subunit of mitochondrial D(+)-dependent isocitrate dehydrogese; complex catalyzes the oxidation of isocitrate to alpha-ketoglutarate in the TCA cycle
Cons_Shared	orbh_1215	2	2	2	1	2	1	2	2	2	9	6	0.75	-	Agabi_varbisH97_2_190526	Armosto1_257936	Auramp1_411700	Copci_AmutBmut1_400441	Cryne_JEC21_1_6362	Mk_01191700	PleosPC15_2_1091387	Ptegra1_652546	Schco3_2605941	IPR003952::Fumarate reductase/succite dehydrogese; FAD-binding site::9	IPR015939::Fumarate reductase/succite dehydrogese flavoprotein-like; C-termil::9	IPR027477::Succite dehydrogese/fumarate reductase flavoprotein; catalytic domain superfamily::9	IPR014006::Succite dehydrogese/fumarate reductase; flavoprotein subunit::9	IPR036188::FAD/D(P)-binding domain superfamily::9	IPR003953::FAD-dependent oxidoreductase 2; FAD binding domain::9	IPR011281::Succite dehydrogese; flavoprotein subunit::9	IPR037099::Fumarate reductase/succite dehydrogese flavoprotein-like; C-termil domain superfamily::9			420	AN2916_Aspnid tca-12_Neucr sdh1_pombe YKL148C_SDH1_Sacce1	Uncharacterized ORF Putative succite dehydrogese with a predicted role in the TCA cycle		succite dehydrogese Sdh1 (predicted)	Flavoprotein subunit of succite dehydrogese; couples the oxidation of succite to the transfer of electrons to ubiquinone as part of the TCA cycle and the mitochondrial respiratory chain; FAD binding to Sdh1p is required for the assembly of the succite dehydrogese subunits; SDH1 has a paralog; YJL045W; that arose from the whole genome duplication
Cons_Shared	orbh_1132	4	1	4	2	2	4	1	2	4	9	6	0.75	-	Agabi_varbisH97_2_190001	Armosto1_268760	Auramp1_505543	Copci_AmutBmut1_454395	Cryne_JEC21_1_706	Mk_00782900	PleosPC15_2_1095962	Ptegra1_521843	Schco3_2612608	IPR005811::ATP-citrate lyase/succinyl-CoA ligase::9	IPR013650::ATP-grasp fold; succinyl-CoA synthetase-type::9	IPR017866::Succinyl-CoA synthetase; beta subunit; conserved site::9	IPR016102::Succinyl-CoA synthetase-like::9	IPR005809::Succite--CoA synthetase; beta subunit::9	IPR013815::ATP-grasp fold; subdomain 1::9	IPR011761::ATP-grasp fold::8				425	YGR244C_LSC2_Sacce1 SPCC1620.08_pombe AN7000_Aspnid	Uncharacterized ORF Putative succite-CoA ligase (ADP-forming) with a predicted role in the TCA cycle		succite-CoA ligase beta subunit Lsc2 (predicted)	Beta subunit of succinyl-CoA ligase; succinyl-CoA ligase is a mitochondrial enzyme of the TCA cycle that catalyzes the nucleotide-dependent conversion of succinyl-CoA to succite
Cons_Shared	orbh_1428	4	1	4	2	2	1	2	4	2	9	6	0.75	-	Agabi_varbisH97_2_192140	Armosto1_261072	Auramp1_482524	Copci_AmutBmut1_409635	Cryne_JEC21_1_5543	Mk_01431400	PleosPC15_2_1088858	Ptegra1_653343	Schco3_2645782	IPR010097::Malate dehydrogese; type 1::9	IPR001557::L-lactate/malate dehydrogese::9	IPR015955::Lactate dehydrogese/glycoside hydrolase; family 4; C-termil::9	IPR001236::Lactate/malate dehydrogese; N-termil::9	IPR022383::Lactate/malate dehydrogese; C-termil::9	IPR036291::D(P)-binding domain superfamily::9	IPR001252::Malate dehydrogese; active site::8				415	tca-15_Neucr MDH1_pombe YKL085W_MDH1_Sacce1 AN6717_mdhA_Aspnid	Verified ORF Putative mitochondrial malate dehydrogese with a predicted role in the TCA cycle intracellular protein abundance decreased by medione stress			Mitochondrial malate dehydrogese; catalyzes interconversion of malate and oxaloacetate; involved in the tricarboxylic acid (TCA) cycle; phosphorylated
Cons_Shared	orbh_1584	2	1	2	2	2	4	2	1	2	9	6	0.75	-	Agabi_varbisH97_2_193525	Armosto1_271102	Auramp1_502742	Copci_AmutBmut1_545855	Cryne_JEC21_1_2442	Mk_00889300	PleosPC15_2_1077982	Ptegra1_523979	Schco3_2614888	IPR042179::Multifunctiol 2-oxoglutarate metabolism enzyme; C-termil domain superfamily::9	IPR011603::2-oxoglutarate dehydrogese E1 component::9	IPR031717::Multifunctiol 2-oxoglutarate metabolism enzyme; C-termil::9	IPR005475::Transketolase-like; pyrimidine-binding domain::9	IPR029061::Thiamin diphosphate-binding fold::9	IPR032106::2-oxoglutarate dehydrogese E1 component; N-termil domain::9	IPR001017::Dehydrogese; E1 component::9				419	tca-7_Neucr YIL125W_KGD1_Sacce1 AN5571_kgdA_Aspnid kgd1_pombe	Uncharacterized ORF Putative oxoglutarate dehydrogese (lipoamide) with a predicted role in the TCA cycle		2-oxoglutarate dehydrogese (lipoamide) (e1 component of oxoglutarate dehydrogese complex) (predicted)	Subunit of the mitochondrial alpha-ketoglutarate dehydrogese complex; catalyzes a key step in the tricarboxylic acid (TCA) cycle; the oxidative decarboxylation of alpha-ketoglutarate to form succinyl-CoA
Cons_Shared	orbh_3390	4	1	4	1	2	4	4	1	4	9	5	0.625	-	Agabi_varbisH97_2_212365	Armosto1_265372	Auramp1_21428	Copci_AmutBmut1_543155	Cryne_JEC21_1_2192	Mk_00320200	PleosPC15_2_41319	Ptegra1_514287	Schco3_2631970	IPR023865::Aliphatic acid kise; short-chain; conserved site::7	IPR004372::Acetate/propiote kise::7	IPR043129::ATPase; nucleotide binding domain::7	IPR000890::Aliphatic acid kise; short-chain::7	IPR024338::Stretch-activated cation channel Mid1/Calcium influx-promoting protein Ehs1::3						286	CNBN1520_cryptococcus AN4914_Aspnid CNN01560_cryptococcus AN4914_ack_Aspnid	Uncharacterized ORF Putative acetate kise with a predicted role in acetate; acetaldehyde; and ethanol (two-carbon) metabolism
Cons_Shared	orbh_2757	4	1	4	1	1	1	4	4	4	9	4	0.5	-	Agabi_varbisH97_2_62584	Armosto1_258671	Auramp1_561482	Copci_AmutBmut1_380777	Cryne_JEC21_1_6257	Mk_01275600	PleosPC15_2_1073916	Ptegra1_540974	Schco3_2484732	IPR001891::Malic oxidoreductase::9	IPR012302::Malic enzyme; D-binding::9	IPR036291::D(P)-binding domain superfamily::9	IPR012301::Malic enzyme; N-termil domain::9	IPR037062::Malic enzyme; N-termil domain superfamily::9	IPR015884::Malic enzyme; conserved site::8					330	YKL029C_MAE1_Sacce1 NCU02906_Neucr mae2_pombe			malic enzyme; malate dehydrogese (oxaloacetate decarboxylating); Mae2	Mitochondrial malic enzyme; catalyzes the oxidative decarboxylation of malate to pyruvate; which is a key intermediate in sugar metabolism and a precursor for synthesis of several amino acids
Cons_Shared	orbh_1081	4	2	4	2	2	4	4	4	4	9	8	1	-	Agabi_varbisH97_2_189667	Armosto1_268560	Auramp1_486846	Copci_AmutBmut1_494778	Cryne_JEC21_1_1873	Mk_00821400	PleosPC15_2_1088517	Ptegra1_559552	Schco3_2611066	IPR000796::Aspartate/other aminotransferase::9	IPR004839::Aminotransferase; class I/classII::9	IPR015422::Pyridoxal phosphate-dependent transferase domain 1::9	IPR015421::Pyridoxal phosphate-dependent transferase; major domain::9	IPR015424::Pyridoxal phosphate-dependent transferase::9	IPR004838::Aminotransferases; class-I; pyridoxal-phosphate-binding site::8					386	SPBC725.01_pombe NCU08411_Neucr AN1993_Aspnid	Uncharacterized ORF Putative aspartate transamise with a predicted role in alanine; aspartate; and aromatic amino acid metabolism		mitochondrial aspartate aminotransferase Maa1 (predicted)
Cons_Shared	orbh_1169	4	2	4	4	2	2	2	4	4	9	8	1	-	Agabi_varbisH97_2_190260	Armosto1_269591	Auramp1_548434	Copci_AmutBmut1_485698	Cryne_JEC21_1_389	Mk_01052900	PleosPC15_2_1052256	Ptegra1_565045	Schco3_2605455	IPR022628::S-adenosylmethionine synthetase; N-termil::9	IPR022629::S-adenosylmethionine synthetase; central domain::9	IPR022630::S-adenosylmethionine synthetase; C-termil::9	IPR002133::S-adenosylmethionine synthetase::9	IPR022631::S-adenosylmethionine synthetase; conserved site::9	IPR022636::S-adenosylmethionine synthetase superfamily::9					419	YLR180W_SAM1_Sacce1 sam1_pombe AN1222_sasA_Aspnid	Verified ORF Putative S-adenosylmethionine synthetase predicted role in methionine metabolism expression reduced after exposure to farnesol strongly expressed during vegetative growth; downregulated during development in asexual or sexual cultures		S-adenosylmethionine synthetase	S-adenosylmethionine synthetase; catalyzes transfer of the adenosyl group of ATP to the sulfur atom of methionine; SAM1 has a paralog; SAM2; that arose from the whole genome duplication
Cons_Shared	orbh_2820	4	2	4	4	2	2	4	2	2	9	8	1	-	Agabi_varbisH97_2_65664	Armosto1_257557	Auramp1_582694	Copci_AmutBmut1_449476	Cryne_JEC21_1_4962	Mk_00328100	PleosPC15_2_1090361	Ptegra1_651061	Schco3_1189573	IPR016207::Ketol-acid reductoisomerase; fungi::9	IPR000506::Ketol-acid reductoisomerase; C-termil::9	IPR008927::6-phosphoglucote dehydrogese-like; C-termil domain superfamily::9	IPR013328::6-phosphoglucote dehydrogese; domain 2::9	IPR013116::Ketol-acid reductoisomerase; N-termil::9	IPR013023::Ketol-acid reductoisomerase::9	IPR036291::D(P)-binding domain superfamily::9				417	YLR355C_ILV5_Sacce1 AN2526_Aspnid ilv5_pombe	Uncharacterized ORF Putative ketol-acid reductoisomerase with a predicted role in Coenzyme A and pantothete biosynthesis or amino acid metabolism		acetohydroxyacid reductoisomerase (predicted)	Acetohydroxyacid reductoisomerase and mtD binding protein; involved in branched-chain amino acid biosynthesis and maintence of wild-type mitochondrial D; found in mitochondrial nucleoids
Cons_Shared	orbh_130	2	2	2	2	2	2	2	4	4	9	8	1	-	Agabi_varbisH97_2_118981	Armosto1_264761	Auramp1_546888	Copci_AmutBmut1_503012	Cryne_JEC21_1_3616	Mk_00107100	PleosPC15_2_1113222	Ptegra1_566572	Schco3_2494852	IPR014729::Rossmann-like alpha/beta/alpha sandwich fold::9	IPR001518::Argininosuccite synthase::9	IPR018223::Argininosuccite synthase; conserved site::9	IPR024074::Argininosuccite synthetase; catalytic/multimerisation domain body::9	IPR023434::Argininosuccite synthase; type 1 subfamily::9						419	arg12_pombe arg-1_Neucr YOL058W_ARG1_Sacce1 AN1883_Aspnid	Verified ORF Putative argininosuccite synthase with a predicted role in arginine metabolism intracellular protein abundance decreased by medione stress		argininosuccite synthase Arg12	Arginosuccite synthetase; catalyzes the formation of L-argininosuccite from citrulline and L-aspartate in the arginine biosynthesis pathway; potential Cdc28p substrate
Cons_Shared	orbh_1507	2	2	4	2	2	2	4	2	2	9	8	1	-	Agabi_varbisH97_2_192773	Armosto1_250867	Auramp1_421131	Copci_AmutBmut1_412843	Cryne_JEC21_1_1895	Mk_00679700	PleosPC15_2_61627	Ptegra1_557384	Schco3_2631390	IPR011761::ATP-grasp fold::9	IPR016185::Pre-ATP-grasp domain superfamily::9	IPR005479::Carbamoyl-phosphate synthetase large subunit-like; ATP-binding domain::9	IPR011607::Methylglyoxal synthase-like domain::9	IPR036914::Methylglyoxal synthase-like domain superfamily::9	IPR013815::ATP-grasp fold; subdomain 1::9	IPR005483::Carbamoyl-phosphate synthase large subunit; CPSase domain::9	IPR006275::Carbamoyl-phosphate synthase; large subunit::9	IPR036897::Carbamoyl-phosphate synthetase; large subunit oligomerisation domain superfamily::9	IPR005480::Carbamoyl-phosphate synthetase; large subunit oligomerisation domain::9	407	AN5999_Aspnid YJR109C_CPA2_Sacce1 arg-3_Neucr arg4_pombe	Verified ORF Carbamoyl-phosphate synthase; large subunit predicted role in arginine or pyrimidine metabolism protein induced by farnesol		arginine specific carbamoyl-phosphate synthase Arg4	Large subunit of carbamoyl phosphate synthetase; carbamoyl phosphate synthetase catalyzes a step in the synthesis of citrulline; an arginine precursor
Cons_Shared	orbh_1446	4	4	2	2	1	2	4	2	4	9	7	0.875	-	Agabi_varbisH97_2_192415	Armosto1_250494	Auramp1_474026	Copci_AmutBmut1_439153	Cryne_JEC21_1_6391	Mk_00696900	PleosPC15_2_1093336	Ptegra1_603643	Schco3_2632420	IPR002650::Sulphate adenylyltransferase::9	IPR015947::PUA-like superfamily::9	IPR024951::Sulphate adenylyltransferase catalytic domain::9	IPR002891::Adenylyl-sulfate kise::9	IPR025980::ATP-sulfurylase PUA-like domain::9	IPR014729::Rossmann-like alpha/beta/alpha sandwich fold::9	IPR027417::P-loop containing nucleoside triphosphate hydrolase::9	IPR027535::Sulfate adenylyltransferase::8			408	sua1_pombe MET3_ustilago YJR010W_MET3_Sacce1 met3_Aspnid MET3_Neucr AN4769_sC_Aspnid MET3_candida MET3_fusarium	Verified ORF ATP sulfurylase involved in sulfate assimilation mutants are resistant to selete		cystathionine gamma-synthase Met3	ATP sulfurylase; catalyzes the primary step of intracellular sulfate activation; essential for assimilatory reduction of sulfate to sulfide; involved in methionine metabolism; human homolog PAPSS2 complements yeast null mutant
Cons_Shared	orbh_497	4	2	1	2	2	2	4	4	4	9	7	0.875	-	Agabi_varbisH97_2_152938	Armosto1_265314	Auramp1_548645	Copci_AmutBmut1_476105	Cryne_JEC21_1_3919	Mk_00588400	PleosPC15_2_1059879	Ptegra1_566419	Schco3_1159065	IPR002528::Multi antimicrobial extrusion protein::9										408	YDR338C_YDR338C_Sacce1 SPAC323.07c_pombe AN0581_Aspnid NCU07720_Neucr	Uncharacterized ORF Orthologs have role in S-adenosylmethionine biosynthetic process		MatE family transmembrane transporter (predicted)	Putative protein of unknown function; member of the multi-drug and toxin extrusion (MATE) family of the multidrug/oligosaccharidyl-lipid/polysaccharide (MOP) exporter superfamily
Cons_Shared	orbh_4899	4	2	4	2	2	2	4	0	4	8	7	1	-		Armosto1_268440	Auramp1_546366	Copci_AmutBmut1_493868	Cryne_JEC21_1_3280	Mk_00796500	PleosPC15_2_38643	Ptegra1_521695	Schco3_2528761	IPR006855::Vertebrate-like GS Gcn5-related N-acetyltransferase (GT) domain::8	IPR016181::Acyl-CoA N-acyltransferase::4									393	arg-14_Neucr arg2_Aspnid arg6_pombe ARG2_candida ARG2_cryptococcus arg2_Aspnig AN5867_Aspnid	Uncharacterized ORF Orthologs have acetyl-CoA:L-glutamate N-acetyltransferase activity; role in ornithine biosynthetic process and mitochondrial matrix; mitochondrial membrane localization		acetylglutamate synthase Arg6	Acetylglutamate synthase (glutamate N-acetyltransferase); mitochondrial enzyme that catalyzes the first step in the biosynthesis of the arginine precursor ornithine; forms a complex with Arg5;6p
Cons_Shared	orbh_1595	4	1	2	2	2	2	4	2	4	9	7	0.875	-	Agabi_varbisH97_2_193606	Armosto1_270591	Auramp1_440159	Copci_AmutBmut1_365378	Cryne_JEC21_1_3570	Mk_01462500	PleosPC15_2_40761	Ptegra1_604709	Schco3_2614458	IPR016210::D-dependent glutamate dehydrogese; eukaryotes::9	IPR036291::D(P)-binding domain superfamily::9	IPR006096::Glutamate/phenylalanine/leucine/valine dehydrogese; C-termil::9	IPR028971::D-glutamate dehydrogese::8							415	gdh2_pombe YDL215C_GDH2_Sacce1 AN7451_Aspnid	Verified ORF Putative D-glutamate dehydrogese with a predicted role in glutamate and glutamine metabolism		D-dependent glutamate dehydrogese Gdh2	D(+)-dependent glutamate dehydrogese; degrades glutamate to ammonia and alpha-ketoglutarate; expression sensitive to nitrogen catabolite repression and intracellular ammonia levels; genetically interacts with GDH3 by suppressing stress-induced apoptosis
Cons_Shared	orbh_1223	4	2	2	2	2	1	2	4	2	9	7	0.875	-	Agabi_varbisH97_2_190575	Armosto1_257895	Auramp1_500816	Copci_AmutBmut1_354157	Cryne_JEC21_1_3279	Mk_01194200	PleosPC15_2_1099171	Ptegra1_557253	Schco3_2606130	IPR024083::Fumarase/histidase; N-termil::9	IPR008948::L-Aspartase-like::9	IPR009049::Argininosuccite lyase::9	IPR020557::Fumarate lyase; conserved site::9	IPR029419::Argininosuccite lyase; C-termil::9	IPR000362::Fumarate lyase family::9	IPR022761::Fumarate lyase; N-termil::9				420	AN2914_Aspnid argx_pombe arg-10_Neucr YHR018C_ARG4_Sacce1	Verified ORF Putative argininosuccite lyase with a predicted role in arginine metabolism			Argininosuccite lyase; catalyzes the fil step in the arginine biosynthesis pathway
Cons_Shared	orbh_345	4	1	2	2	2	2	2	2	4	9	7	0.875	-	Agabi_varbisH97_2_138566	Armosto1_253895	Auramp1_541611	Copci_AmutBmut1_365839	Cryne_JEC21_1_5338	Mk_00496700	PleosPC15_2_1032546	Ptegra1_658733	Schco3_2643927	IPR015424::Pyridoxal phosphate-dependent transferase::9	IPR004839::Aminotransferase; class I/classII::9	IPR015422::Pyridoxal phosphate-dependent transferase domain 1::9	IPR015421::Pyridoxal phosphate-dependent transferase; major domain::9							421	YLR089C_ALT1_Sacce1 ala_Neucr SPBC582.08_pombe AN1923_Aspnid	Verified ORF Putative alanine transamise with a predicted role in alanine and aspartate metabolism intracellular; medione stress-induced protein		alanine aminotransferase (predicted)	Alanine transamise (glutamic pyruvic transamise); involved in alanine biosynthesis and catabolism; TOR1-independent role in determining chronological lifespan; expression is induced in the presence of alanine; repression is mediated by Nrg1p; ALT1 has a paralog; ALT2; that arose from the whole genome duplication; Alt2p is catalytically ictive
Cons_Shared	orbh_1146	4	2	2	2	2	2	2	1	2	9	7	0.875	-	Agabi_varbisH97_2_190047	Armosto1_268815	Auramp1_501075	Copci_AmutBmut1_443220	Cryne_JEC21_1_2137	Mk_00779500	PleosPC15_2_1092197	Ptegra1_559372	Schco3_2612826	IPR043132::Branched-chain-amino-acid aminotransferase-like; C-termil::9	IPR043131::Branched-chain-amino-acid aminotransferase-like; N-termil::9	IPR033939::Branched-chain aminotransferase::9	IPR001544::Aminotransferase class IV::9	IPR005786::Branched-chain amino acid aminotransferase II::9	IPR018300::Aminotransferase; class IV; conserved site::9	IPR036038::Aminotransferase-like; PLP-dependent enzymes::9				422	ilv-6_Neucr YJR148W_BAT2_Sacce1				Cytosolic branched-chain amino acid (BCAA) aminotransferase; preferentially involved in BCAA catabolism; homolog of murine ECA39; highly expressed during statiory phase and repressed during logarithmic phase; BAT2 has a paralog; BAT1; that arose from the whole genome duplication
Cons_Shared	orbh_2281	4	1	4	4	1	4	4	4	4	9	6	0.75	-	Agabi_varbisH97_2_209095	Armosto1_249837	Auramp1_390731	Copci_AmutBmut1_240518	Cryne_JEC21_1_2209	Mk_00346500	PleosPC15_2_1090897	Ptegra1_582414	Schco3_2631994	IPR015424::Pyridoxal phosphate-dependent transferase::9	IPR000277::Cys/Met metabolism; pyridoxal phosphate-dependent enzyme::9	IPR015421::Pyridoxal phosphate-dependent transferase; major domain::9	IPR015422::Pyridoxal phosphate-dependent transferase domain 1::8							418	AN1446_mecB_Aspnid YAL012W_CYS3_Sacce1 cys-16_Neucr	Verified ORF Cystathionine gamma-lyase; an enzyme involved in methionine; S-adenosylmethionine; and cysteine biosynthesis			Cystathionine gamma-lyase; catalyzes one of the two reactions involved in the transsulfuration pathway that yields cysteine from homocysteine with the intermediary formation of cystathionine; protein abundance increases in response to D replication stress
Cons_Shared	orbh_1606	4	1	4	2	2	1	4	4	4	9	6	0.75	-	Agabi_varbisH97_2_193693	Armosto1_271155	Auramp1_568624	Copci_AmutBmut1_454480	Cryne_JEC21_1_5894	Mk_00900700	PleosPC15_2_1066801	Ptegra1_565700	Schco3_1092260	IPR000581::Dihydroxy-acid/6-phosphoglucote dehydratase::9	IPR042096::Dihydroxy-acid dehydratase; C-termil::9	IPR037237::IlvD/EDD; N-termil domain::9	IPR004404::Dihydroxy-acid dehydratase::8	IPR020558::Dihydroxy-acid/6-phosphoglucote dehydratase; conserved site::8						411	YJR016C_ILV3_Sacce1 AN6346_Aspnid SPAC17G8.06c_pombe NCU04579_Neucr	Verified ORF Putative dihydroxy-acid dehydratase with a predicted role in valine; leucine; and isoleucine metabolism intracellular; medione stress-induced protein		dihydroxy-acid dehydratase (predicted)	Dihydroxyacid dehydratase; catalyzes third step in the common pathway leading to biosynthesis of branched-chain amino acids
Cons_Shared	orbh_2105	4	1	4	4	2	1	2	4	4	9	6	0.75	-	Agabi_varbisH97_2_202979	Armosto1_261572	Auramp1_481311	Copci_AmutBmut1_365455	Cryne_JEC21_1_2598	Mk_00075000	PleosPC15_2_1092848	Ptegra1_511023	Schco3_2623613	IPR011701::Major facilitator superfamily::9	IPR036259::MFS transporter superfamily::9	IPR020846::Major facilitator superfamily domain::9								335	AN1766_Aspnid YMR088C_VBA1_Sacce1 NCU05862_Neucr fnx1_pombe	Uncharacterized ORF Orthologs have L-asparagine transmembrane transporter activity; L-isoleucine transmembrane transporter activity; L-lysine transmembrane transporter activity		vacuolar amino acid transmembrane transporter Fnx1	Permease of basic amino acids in the vacuolar membrane
Cons_Shared	orbh_246	4	1	2	4	2	1	4	4	4	9	6	0.75	-	Agabi_varbisH97_2_133539	Armosto1_263331	Auramp1_409306	Copci_AmutBmut1_432344	Cryne_JEC21_1_4663	Mk_00678100	PleosPC15_2_1053486	Ptegra1_552712	Schco3_2608316	IPR002872::Proline dehydrogese domain::9	IPR015659::Proline oxidase family::9	IPR029041::FAD-linked oxidoreductase-like::9								340	AN9277_Aspnid SPCC70.03c_pombe NCU02936_Neucr	Uncharacterized ORF Has domains with predicted proline dehydrogese activity and role in glutamate biosynthetic process; oxidation-reduction process; proline catabolic process		proline dehydrogese Put1 (predicted)
Cons_Shared	orbh_2702	4	1	2	4	1	4	2	4	4	9	6	0.75	-	Agabi_varbisH97_2_230018	Armosto1_261030	Auramp1_482535	Copci_AmutBmut1_243330	Cryne_JEC21_1_1268	Mk_00026700	PleosPC15_2_1088869	Ptegra1_550581	Schco3_2645753	IPR002161::Pyridoxal 5'-phosphate synthase subunit PdxT/SNO::9	IPR029062::Class I glutamine amidotransferase-like::9	IPR021196::PdxT/SNO family; conserved site::9								400	pdx-2_Neucr YMR095C_SNO1_Sacce1 SPAC222.08c_pombe AN6141_Aspnid	Uncharacterized ORF Orthologs have glutamise activity and role in denovo pyridoxal 5-phosphate biosynthetic process; negative regulation of apoptotic process; pyridoxine biosynthetic process; vitamin B6 biosynthetic process		glutamine aminotransferase subunit Sno1 (predicted)	Protein of unconfirmed function; involved in pyridoxine metabolism; expression is induced during statiory phase; forms a putative glutamine amidotransferase complex with Snz1p; with Sno1p serving as the glutamise
Cons_Shared	orbh_3636	4	0	4	1	2	2	2	4	4	8	6	0.857143	-	Agabi_varbisH97_2_136712	Armosto1_265300	Auramp1_489039	Copci_AmutBmut1_184206	Cryne_JEC21_1_1722	Mk_01405900	PleosPC15_2_1043019		Schco3_2618964	IPR015421::Pyridoxal phosphate-dependent transferase; major domain::8	IPR015422::Pyridoxal phosphate-dependent transferase domain 1::8	IPR005814::Aminotransferase class-III::8	IPR015424::Pyridoxal phosphate-dependent transferase::8							303	AN6930_Aspnid NCU08011_Neucr SPBC1773.03c_pombe	Uncharacterized ORF Has domains with predicted catalytic activity; pyridoxal phosphate binding; transamise activity		aminotransferase class-III; possible transamise; unknown specificity
Cons_Shared	orbh_1633	4	2	4	1	2	1	2	2	4	9	6	0.75	-	Agabi_varbisH97_2_193833	Armosto1_270827	Auramp1_406401	Copci_AmutBmut1_362606	Cryne_JEC21_1_1769	Mk_00895400	PleosPC15_2_1094120	Ptegra1_649460	Schco3_2615224	IPR013785::Aldolase-type TIM barrel::9	IPR006218::DAHP synthetase I/KDSA::9	IPR006219::DHAP synthase; class 1::9								168
Cons_Shared	orbh_1840	4	1	2	1	2	2	2	4	2	9	6	0.75	-	Agabi_varbisH97_2_195821	Armosto1_262055	Auramp1_545375	Copci_AmutBmut1_487184	Cryne_JEC21_1_414	Mk_00107700	PleosPC15_2_50455	Ptegra1_597487	Schco3_2623266	IPR004429::Isopropylmalate dehydrogese::9	IPR024084::Isopropylmalate dehydrogese-like domain::9	IPR019818::Isocitrate/isopropylmalate dehydrogese; conserved site::8								400	AN0912_Aspnid YCL018W_LEU2_Sacce1 leu1_pombe	Uncharacterized ORF Putative Beta-isopropylmalate dehydrogese with a predicted role in valine; leucine; and isoleucine metabolism		3-isopropylmalate dehydrogese Leu1	Beta-isopropylmalate dehydrogese (IMDH); catalyzes the third step in the leucine biosynthesis pathway; can additiolly catalyze the conversion of &#946;-ethylmalate into &#945;-ketovalerate
Cons_Shared	orbh_2327	2	2	4	1	2	1	4	2	4	9	6	0.75	-	Agabi_varbisH97_2_210736	Armosto1_252583	Auramp1_509701	Copci_AmutBmut1_543926	Cryne_JEC21_1_2467	Mk_00515300	PleosPC15_2_1079458	Ptegra1_602293	Schco3_2557283	IPR013708::Shikimate dehydrogese substrate binding; N-termil::9	IPR001381::3-dehydroquite dehydratase type I::9	IPR041121::SDH; C-termil::9	IPR031322::Shikimate kise/gluconokise::9	IPR036291::D(P)-binding domain superfamily::9	IPR006264::3-phosphoshikimate 1-carboxyvinyltransferase::9	IPR023193::3-phosphoshikimate 1-carboxyvinyltransferase; conserved site::9	IPR013785::Aldolase-type TIM barrel::9	IPR008289::Pentafunctiol AroM protein::9	IPR000623::Shikimate kise/Threonine synthase-like 1::9	420	BDBG_02999_blastomyces CNBB3730_cryptococcus UMAG_03607_ustilago aroM-2_penmarneffei AN1132_qutR_Aspnid YDR127W_ARO1_Sacce1 aro1_pombe aro-1_Neucr qutR_Aspnid ARO1_candida CNB01990_cryptococcus	Verified ORF Negative regulator of qut gene expression mutants constitutively express enzymes of the quinic acid utilization pathway	Protein of unknown function	pentafunctiol aromatic polypeptide Aro1 (predicted). The AROM polypeptide catalyzes 5 consecutive enzymatic reactions in prechorismate polyaromatic amino acid biosynthesis.	Phenylpyruvate decarboxylase; catalyzes decarboxylation of phenylpyruvate to phenylacetaldehyde; which is the first specific step in the Ehrlich pathway; involved in protein N-termil Met and Ala catabolism
Cons_Shared	orbh_2331	2	2	4	1	2	1	2	2	4	9	6	0.75	-	Agabi_varbisH97_2_210833	Armosto1_255689	Auramp1_508585	Copci_AmutBmut1_499911	Cryne_JEC21_1_256	Mk_01386000	PleosPC15_2_42813	Ptegra1_557487	Schco3_2608404	IPR012846::Acetolactate synthase; large subunit; biosynthetic::9	IPR029061::Thiamin diphosphate-binding fold::9	IPR011766::Thiamine pyrophosphate enzyme; C-termil TPP-binding::9	IPR012001::Thiamine pyrophosphate enzyme; N-termil TPP-binding domain::9	IPR029035::DHS-like D/FAD-binding domain superfamily::9	IPR012000::Thiamine pyrophosphate enzyme; central domain::9	IPR039368::Acetolactate synthase large subunit; TPP binding domain::9	IPR000399::TPP-binding enzyme; conserved site::8			422	ilv1_pombe AN4956_Aspnid YMR108W_ILV2_Sacce1 NCU07982_Neucr	Verified ORF Large subunit of acetolactate synthase involved in branched-chain amino acid biosynthesis under hypoxic conditions		acetolactate synthase catalytic subunit	Acetolactate synthase; catalyses the first common step in isoleucine and valine biosynthesis and is the target of several classes of inhibitors; localizes to the mitochondria; expression of the gene is under general amino acid control
Cons_Shared	orbh_2565	2	2	2	1	1	2	2	4	4	9	6	0.75	-	Agabi_varbisH97_2_222671	Armosto1_265320	Auramp1_503786	Copci_AmutBmut1_362224	Cryne_JEC21_1_1728	Mk_00280100	PleosPC15_2_51354	Ptegra1_592458	Schco3_2665190	IPR000965::GPR domain::9	IPR012134::Glutamate-5-semialdehyde dehydrogese::9	IPR016163::Aldehyde dehydrogese; C-termil::9	IPR016162::Aldehyde dehydrogese; N-termil::9	IPR016161::Aldehyde/histidinol dehydrogese::9	IPR015590::Aldehyde dehydrogese domain::9	IPR020593::Gamma-glutamyl phosphate reductase GPR; conserved site::4				419	pro-3_Neucr YOR323C_PRO2_Sacce1 pro1_pombe AN5799_Aspnid	Uncharacterized ORF Putative gamma-glutamyl phosphate reductase with a predicted role in proline metabolism		gamma-glutamyl phosphate reductase Pro1	Gamma-glutamyl phosphate reductase; catalyzes the second step in proline biosynthesis
Cons_Shared	orbh_1192	4	1	4	4	1	1	4	4	4	9	5	0.625	-	Agabi_varbisH97_2_190399	Armosto1_255585	Auramp1_508801	Copci_AmutBmut1_494086	Cryne_JEC21_1_5242	Mk_01035200	PleosPC15_2_1087775	Ptegra1_557584	Schco3_2608151	IPR020855::Ureohydrolase; manganese-binding site::9	IPR006035::Ureohydrolase::9	IPR014033::Argise::9	IPR023696::Ureohydrolase domain superfamily::9							403	aru1_pombe YPL111W_CAR1_Sacce1 AN2901_agaA_Aspnid aga-1_Neucr agaA_Aspnid	Verified ORF Argise; catalyzes hydrolysis of arginine to urea and ornithine in the arginine catabolic pathway induced by arginine and repressed by ammonium		argise Aru1	Argise; catabolizes arginine to ornithine and urea; expression responds to both induction by arginine and nitrogen catabolite repression; disruption decreases production of carcinogen ethyl carbamate during wine fermentation and also enhances freeze tolerance
Cons_Shared	orbh_292	4	1	4	2	1	1	4	4	4	9	5	0.625	-	Agabi_varbisH97_2_135514	Armosto1_261822	Auramp1_479611	Copci_AmutBmut1_493001	Cryne_JEC21_1_420	Mk_00088500	PleosPC15_2_1089099	Ptegra1_523198	Schco3_2621941	IPR008146::Glutamine synthetase; catalytic domain::9	IPR008147::Glutamine synthetase; beta-Grasp domain::9	IPR014746::Glutamine synthetase/guanido kise; catalytic domain::9	IPR036651::Glutamine synthetase; N-termil domain superfamily::9	IPR027303::Glutamine synthetase; glycine-rich site::9	IPR027302::Glutamine synthetase; N-termil conserved site::9					395	gln1_pombe YPR035W_GLN1_Sacce1 GLN1_cryptococcus gl_Aspnid	Verified ORF Putative glutamate-ammonia ligase with a predicted role in glutamate and glutamine metabolism intracellular transcript upregulated by nitrate limitation protein abundance decreased by medione stress and induced by farnesol		glutamate-ammonia ligase Gln1	Glutamine synthetase (GS); synthesizes glutamine from glutamate and ammonia; with Glt1p; forms the secondary pathway for glutamate biosynthesis from ammonia; expression regulated by nitrogen source and by amino acid limitation; forms filaments of back-to-back stacks of cylindrical homo-decamers at low pH; leading to enzymatic ictivation and storage during states of advanced cellular starvation; r…
Cons_Shared	orbh_2272	4	2	2	2	1	1	2	2	2	9	6	0.75	-	Agabi_varbisH97_2_208605	Armosto1_257657	Auramp1_571860	Copci_AmutBmut1_450322	Cryne_JEC21_1_6234	Mk_00584000	PleosPC15_2_1044117	Ptegra1_619355	Schco3_1215796	IPR036393::Acetylglutamate kise-like superfamily::9	IPR001048::Aspartate/glutamate/uridylate kise::9	IPR018042::Aspartate kise; conserved site::8	IPR001341::Aspartate kise::8	IPR002912::ACT domain::7	IPR027795::CASTOR; ACT domain::7
Cons_Shared	orbh_3435	4	1	4	4	1	1	2	4	4	9	5	0.625	-	Agabi_varbisH97_2_191181	Armosto1_257548	Auramp1_399921	Copci_AmutBmut1_368032	Cryne_JEC21_1_3236	Mk_00338300	PleosPC15_2_1067671	Ptegra1_544550	Schco3_2626187	IPR002220::DapA-like::9	IPR013785::Aldolase-type TIM barrel::9									199
Cons_Shared	orbh_5765	4	2	2	4	2	2	2	0	0	7	6	1	-		Armosto1_267134	Auramp1_506506		Cryne_JEC21_1_5850	Mk_01235300	PleosPC15_2_1033287	Ptegra1_568270	Schco3_2604379	IPR011008::Dimeric alpha-beta barrel::7	IPR008000::Rhamnose/fucose mutarotase::7
Cons_Shared	orbh_2439	2	1	2	4	4	4	2	4	2	9	7	0.875	-	Agabi_varbisH97_2_216153	Armosto1_255541	Auramp1_157697	Copci_AmutBmut1_451372	Cryne_JEC21_1_5239	Mk_01033400	PleosPC15_2_1091437	Ptegra1_599604	Schco3_2608196	IPR000210::BTB/POZ domain::2										97
Cons_Shared	orbh_3394	4	4	4	4	2	4	4	4	4	9	8	1	-	Agabi_varbisH97_2_195354	Armosto1_269750	Auramp1_395883	Copci_AmutBmut1_472224	Cryne_JEC21_1_1706	Mk_00523500	PleosPC15_2_1090819	Ptegra1_557267	Schco3_2620726	IPR018028::Catalase; mono-functiol; haem-containing::9	IPR020835::Catalase superfamily::9	IPR011614::Catalase core domain::9	IPR024708::Catalase active site::9	IPR037060::Catalase core domain superfamily::9	IPR010582::Catalase immune-responsive domain::9	IPR002226::Catalase haem-binding site::9	IPR024711::Catalase; mono-functiol; haem-containing; clades 1 and 3::7			374	AN5918_catC_Aspnid cat-4_Neucr YDR256C_CTA1_Sacce1 CAT1_candida cta1_pombe	Verified ORF Putative catalase with a predicted role in gluconic acid and glucote metabolism			Catalase A; breaks down hydrogen peroxide in the peroxisomal matrix formed by acyl-CoA oxidase (Pox1p) during fatty acid beta-oxidation
Cons_Shared	orbh_1734	4	2	4	2	4	4	2	4	4	9	8	1	-	Agabi_varbisH97_2_194839	Armosto1_253526	Auramp1_484728	Copci_AmutBmut1_62205	Cryne_JEC21_1_1749	Mk_01006800	PleosPC15_2_1098969	Ptegra1_563125	Schco3_2628120	IPR008927::6-phosphoglucote dehydrogese-like; C-termil domain superfamily::9	IPR014027::UDP-glucose/GDP-mannose dehydrogese; C-termil::9	IPR036220::UDP-glucose/GDP-mannose dehydrogese; C-termil domain superfamily::9	IPR028356::UDP-glucose 6-dehydrogese; eukaryotic type::9	IPR017476::UDP-glucose/GDP-mannose dehydrogese::9	IPR001732::UDP-glucose/GDP-mannose dehydrogese; N-termil::9	IPR014026::UDP-glucose/GDP-mannose dehydrogese; dimerisation::9	IPR036291::D(P)-binding domain superfamily::9			325	AN9172_Aspnid NCU04936_Neucr	Uncharacterized ORF Has domains with predicted D binding; oxidoreductase activity; acting on the CH-OH group of donors; D or DP as acceptor activity and role in oxidation-reduction process
Cons_Shared	orbh_1373	4	1	4	2	4	4	2	4	4	9	7	0.875	-	Agabi_varbisH97_2_191898	Armosto1_261456	Auramp1_481995	Copci_AmutBmut1_371291	Cryne_JEC21_1_5447	Mk_00055000	PleosPC15_2_1112199	Ptegra1_569333	Schco3_2540875	IPR036291::D(P)-binding domain superfamily::9	IPR016040::D(P)-binding domain::9									333	YBR019C_GAL10_Sacce1 SPBPB2B2.11_pombe NCU00403_Neucr			nucleotide-sugar 4;6-dehydratase (predicted)	UDP-glucose-4-epimerase; catalyzes the interconversion of UDP-galactose and UDP-D-glucose in galactose metabolism; also catalyzes the conversion of alpha-D-glucose or alpha-D-galactose to their beta-anomers
Cons_Shared	orbh_1516	4	2	4	4	1	2	4	4	4	9	7	0.875	-	Agabi_varbisH97_2_192853	Armosto1_251164	Auramp1_532772	Copci_AmutBmut1_442723	Cryne_JEC21_1_2734	Mk_01448700	PleosPC15_2_1089691	Ptegra1_581691	Schco3_2630637	IPR023210::DP-dependent oxidoreductase domain::9	IPR020471::Aldo/keto reductase::9	IPR036812::DP-dependent oxidoreductase domain superfamily::9	IPR018170::Aldo/keto reductase; conserved site::8							216	AN7193_larA_Aspnid	Verified ORF Putative DPH-dependent glycerol dehydrogese with a predicted role in carbohydrate metabolism transcript upregulated by growth in glycerol; by growth on xylose and after exposure to farnesol
Cons_Shared	orbh_1667	4	1	2	4	4	4	4	4	2	9	7	0.875	-	Agabi_varbisH97_2_194241	Armosto1_251464	Auramp1_390943	Copci_AmutBmut1_369180	Cryne_JEC21_1_915	Mk_00428300	PleosPC15_2_1035368	Ptegra1_543693	Schco3_2644333	IPR013149::Alcohol dehydrogese; C-termil::9	IPR011032::GroES-like superfamily::9	IPR013154::Alcohol dehydrogese; N-termil::9	IPR036291::D(P)-binding domain superfamily::9	IPR020843::Polyketide synthase; enoylreductase domain::8	IPR002328::Alcohol dehydrogese; zinc-type; conserved site::8					302	NCU07022_Neucr AN0774_Aspnid	Uncharacterized ORF Has domains with predicted oxidoreductase activity; transferase activity; transferring acyl groups other than amino-acyl groups; zinc ion binding activity and role in oxidation-reduction process
Cons_Shared	orbh_2362	4	2	4	4	1	2	4	4	4	9	7	0.875	-	Agabi_varbisH97_2_212695	Armosto1_250245	Auramp1_392777	Copci_AmutBmut1_494484	Cryne_JEC21_1_4635	Mk_00644900	PleosPC15_2_1056050	Ptegra1_498165	Schco3_2507376	IPR008928::Six-hairpin glycosidase superfamily::9	IPR004888::Glycoside hydrolase family 63::9	IPR031335::Glycosyl hydrolase family 63; C-termil::7	IPR012341::Six-hairpin glycosidase-like superfamily::4							372	NCU01768_Neucr AN6286_Aspnid YMR196W_YMR196W_Sacce1 Candida_C3_03410C_A	Uncharacterized ORF Has domains with predicted mannosyl-oligosaccharide glucosidase activity and role in oligosaccharide metabolic process	Putative glycoside hydrolase; statiory phase enriched protein; Hog1p-downregulated; shows colony morphology-related gene regulation by Ssn6p		Putative protein of unknown function; green fluorescent protein (GFP)-fusion protein localizes to the cytoplasm; YMR196W is not an essential gene
Cons_Shared	orbh_1985	2	2	4	4	1	4	4	4	4	9	7	0.875	-	Agabi_varbisH97_2_199426	Armosto1_258004	Auramp1_510984	Copci_AmutBmut1_436876	Cryne_JEC21_1_53	Mk_01202600	PleosPC15_2_1110500	Ptegra1_647102	Schco3_2607718	IPR028343::Fructose-1;6-bisphosphatase::9	IPR000146::Fructose-1;6-bisphosphatase class 1::9	IPR033391::Fructose-1-6-bisphosphatase class I; N-termil::9	IPR044015::Fructose-1-6-bisphosphatase class 1; C-termil::9	IPR020548::Fructose-1;6-bisphosphatase; active site::9						417	fbp-1_Neucr YLR377C_FBP1_Sacce1 fbp1_pombe AN5604_acuG_Aspnid	Verified ORF Putative fructose-bisphosphatase with a predicted role in gluconeogenesis and glycolysis intracellular protein abundance decreased by medione stress expression upregulated after exposure to farnesol		fructose-1;6-bisphosphatase Fbp1	Fructose-1;6-bisphosphatase; key regulatory enzyme in the gluconeogenesis pathway; required for glucose metabolism; undergoes either proteasome-mediated or autophagy-mediated degradation depending on growth conditions; glucose starvation results in redistribution to the periplasm; interacts with Vid30p
Cons_Shared	orbh_3335	4	1	4	4	4	4	4	1	4	9	6	0.75	-	Agabi_varbisH97_2_206909	Armosto1_270922	Auramp1_406314	Copci_AmutBmut1_466786	Cryne_JEC21_1_3302	Mk_00193500	PleosPC15_2_157820	Ptegra1_612635	Schco3_2664270	IPR005197::Glycoside hydrolase family 71::9										130	AN7349_mutA_Aspnid	Verified ORF Protein with alpha-1;3-glucase (mutase) activity; involved in carbohydrate catabolism highly expressed during sexual development; specifically expressed in Hulle cells
Cons_Shared	orbh_1267	4	2	4	4	4	1	4	1	4	9	6	0.75	-	Agabi_varbisH97_2_190944	Armosto1_267394	Auramp1_516722	Copci_AmutBmut1_499280	Cryne_JEC21_1_5910	Mk_01363600	PleosPC15_2_1061735	Ptegra1_520877	Schco3_2604109	IPR017853::Glycoside hydrolase superfamily::9	IPR000322::Glycoside hydrolase family 31::9	IPR013780::Glycosyl hydrolase; all-beta::9	IPR025887::Glycoside hydrolase family 31; N-termil domain::9	IPR031727::Galactose mutarotase; N-termil barrel::9	IPR011013::Galactose mutarotase-like domain superfamily::9	IPR030459::Glycosyl hydrolases family 31; conserved site::4	IPR030458::Glycosyl hydrolases family 31; active site::2			347	GAM1_candida AN7345_agdC_Aspnid agdC_Aspnid gh31-3_Neucr	Verified ORF Protein with glucosidase activity; involved in degradation of glucans predicted role in maltose metabolism
Cons_Shared	orbh_3614	4	2	4	0	4	1	4	4	4	8	6	0.857143	-	Agabi_varbisH97_2_134077	Armosto1_266768	Auramp1_462474	Copci_AmutBmut1_495249	Cryne_JEC21_1_115		PleosPC15_2_1061367	Ptegra1_551987	Schco3_2607034	IPR006047::Glycosyl hydrolase; family 13; catalytic domain::8	IPR013780::Glycosyl hydrolase; all-beta::8	IPR013777::Alpha-amylase-like::8	IPR015340::Alpha-amylase; domain of unknown function DUF1966; C-termil::8	IPR017853::Glycoside hydrolase superfamily::8						281	AN2018_amyA_Aspnid mde5_pombe gh13-2_Neucr	Uncharacterized ORF Putative alpha-amylase with a predicted role in starch metabolism		alpha-amylase homolog Mde5
Cons_Shared	orbh_3219	4	2	2	4	4	1	1	4	4	9	6	0.75	-	Agabi_varbisH97_2_227554	Armosto1_254733	Auramp1_506281	Copci_AmutBmut1_430412	Cryne_JEC21_1_1889	Mk_01154300	PleosPC15_2_1068067	Ptegra1_550772	Schco3_78927	IPR017853::Glycoside hydrolase superfamily::9	IPR031728::Beta-glucuronidase; C-termil::9	IPR013780::Glycosyl hydrolase; all-beta::2								14
Cons_Shared	orbh_2990	4	2	4	1	2	1	2	4	4	9	6	0.75	-	Agabi_varbisH97_2_201037	Armosto1_249995	Auramp1_476610	Copci_AmutBmut1_508093	Cryne_JEC21_1_6395	Mk_00488000	PleosPC15_2_1112538	Ptegra1_603380	Schco3_2633791	IPR029068::Glyoxalase/Bleomycin resistance protein/Dihydroxybiphenyl dioxygese::9	IPR004361::Glyoxalase I::9	IPR018146::Glyoxalase I; conserved site::9	IPR037523::Vicil oxygen chelate (VOC) domain::9	IPR004360::Glyoxalase/fosfomycin resistance/dioxygese domain::9						396	YML004C_GLO1_Sacce1 NCU04815_Neucr glo1_pombe			glyoxalase I	Monomeric glyoxalase I; catalyzes the detoxification of methylglyoxal (a by-product of glycolysis) via condensation with glutathione to produce S-D-lactoylglutathione; expression regulated by methylglyoxal levels and osmotic stress
Cons_Shared	orbh_1558	4	1	2	4	1	2	4	2	4	9	6	0.75	-	Agabi_varbisH97_2_193304	Armosto1_265159	Auramp1_428361	Copci_AmutBmut1_136894	Cryne_JEC21_1_4659	Mk_00410500	PleosPC15_2_51369	Ptegra1_552575	Schco3_2496688	IPR000683::Oxidoreductase; N-termil::9	IPR036291::D(P)-binding domain superfamily::9									364	NCU01704_Neucr AN5123_Aspnid dhd1_pombe	Uncharacterized ORF Has domains with predicted oxidoreductase activity		D-xylose 1-dehydrogese (DP+) (predicted)
Cons_Shared	orbh_1713	4	1	4	4	1	1	2	4	4	9	5	0.625	-	Agabi_varbisH97_2_194643	Armosto1_266790	Auramp1_615094	Copci_AmutBmut1_499160	Cryne_JEC21_1_2667	Mk_01190100	PleosPC15_2_1064869	Ptegra1_533957	Schco3_2512665	IPR001672::Phosphoglucose isomerase (PGI)::9	IPR023096::Phosphoglucose isomerase; C-termil::9	IPR035476::Phosphoglucose isomerase; SIS domain 1::9	IPR018189::Phosphoglucose isomerase; conserved site::9	IPR035482::Phosphoglucose isomerase; SIS domain 2::9						430	YBR196C_PGI1_Sacce1 pgi1_pombe PGI1_candida AN6037_swoM_Aspnid	Verified ORF Putative glucose-6-phosphate isomerase with a predicted role in gluconeogenesis and glycolysis mutant defective in hyphal polarity and conidiation		glucose-6-phosphate isomerase (predicted)	Glycolytic enzyme phosphoglucose isomerase; catalyzes the interconversion of glucose-6-phosphate and fructose-6-phosphate; required for cell cycle progression and completion of the gluconeogenic events of sporulation
Cons_Shared	orbh_5023	4	1	4	1	1	4	4	0	4	8	4	0.571429	-		Armosto1_265371	Auramp1_551095	Copci_AmutBmut1_451069	Cryne_JEC21_1_4488	Mk_00320100	PleosPC15_2_1090331	Ptegra1_592380	Schco3_2637167	IPR029061::Thiamin diphosphate-binding fold::8	IPR005593::Xylulose 5-phosphate/Fructose 6-phosphate phosphoketolase::8	IPR009014::Transketolase C-termil/Pyruvate-ferredoxin oxidoreductase domain II::8	IPR019789::Xylulose 5-phosphate/Fructose 6-phosphate phosphoketolase; thiamine diphosphate binding site::8	IPR018969::Xylulose 5-phosphate/Fructose 6-phosphate phosphoketolase; C-termil::8	IPR018970::Xylulose 5-phosphate/Fructose 6-phosphate phosphoketolase; N-termil::8	IPR019790::Xylulose 5-phosphate/Fructose 6-phosphate phosphoketolase; conserved site::8				287	AN4913_phk_Aspnid SPBC24C6.09c_pombe NCU05151_Neucr	Uncharacterized ORF Putative histidine-containing phosphotransfer protein		phosphoketolase family protein (predicted)
Cons_Shared	orbh_2208	4	2	4	4	2	2	4	2	2	9	8	1	-	Agabi_varbisH97_2_206172	Armosto1_264960	Auramp1_503615	Copci_AmutBmut1_405214	Cryne_JEC21_1_1100	Mk_01028300	PleosPC15_2_61816	Ptegra1_528746	Schco3_2598145	IPR010401::Glycogen debranching enzyme::9	IPR008928::Six-hairpin glycosidase superfamily::9	IPR032792::Glycogen debranching enzyme; glucanotransferase domain::9	IPR032788::Glycogen debranching enzyme; central domain::9	IPR029436::Eukaryotic glycogen debranching enzyme; N-termil domain::9	IPR032790::Glycogen debranching enzyme; C-termil::9	IPR017853::Glycoside hydrolase superfamily::9				410	YPR184W_GDB1_Sacce1 AN10060_Aspnid NCU00743_Neucr	Uncharacterized ORF Putative alpha-amylase glycogen debranching enzyme			Glycogen debranching enzyme; contains glucanotranferase and alpha-1;6-amyloglucosidase activities; required for glycogen degradation; phosphorylated in mitochondria; activity is inhibited by Igd1p; protein abundance increases in response to D replication stress
Cons_Shared	orbh_550	2	2	4	4	2	4	4	2	4	9	8	1	-	Agabi_varbisH97_2_176882	Armosto1_267274	Auramp1_506586	Copci_AmutBmut1_455149	Cryne_JEC21_1_5475	Mk_01365600	PleosPC15_2_1110806	Ptegra1_87613	Schco3_2485540	IPR038175::CBM21 domain superfamily::9	IPR005036::CBM21 (carbohydrate binding type-21) domain::9									27
Cons_Shared	orbh_2355	4	1	4	4	2	2	4	2	4	9	7	0.875	-	Agabi_varbisH97_2_212415	Armosto1_269941	Auramp1_396621	Copci_AmutBmut1_457685	Cryne_JEC21_1_865	Mk_01008600	PleosPC15_2_1114673	Ptegra1_536624	Schco3_2629739	IPR008631::Glycogen synthase::9										411	AN8010_Aspnid YFR015C_GSY1_Sacce1	Uncharacterized ORF Putative glycogen (starch) synthase with a predicted role in glycogen biosynthesis			Glycogen synthase; expression induced by glucose limitation; nitrogen starvation; environmental stress; and entry into statiory phase; GSY1 has a paralog; GSY2; that arose from the whole genome duplication; relocalizes from nucleus to cytoplasmic foci upon D replication stress
Cons_Shared	orbh_646	2	2	4	1	1	2	4	2	4	9	6	0.75	-	Agabi_varbisH97_2_182070	Armosto1_269075	Auramp1_566514	Copci_AmutBmut1_461263	Cryne_JEC21_1_5705	Mk_01287300	PleosPC15_2_49652	Ptegra1_579182	Schco3_2565065	IPR029044::Nucleotide-diphospho-sugar transferases::9	IPR002495::Glycosyl transferase; family 8::9									102
Cons_Shared	orbh_1455	4	1	2	4	4	1	2	2	4	9	6	0.75	-	Agabi_varbisH97_2_192455	Armosto1_271188	Auramp1_473315	Copci_AmutBmut1_473268	Cryne_JEC21_1_4448	Mk_00938900	PleosPC15_2_29106	Ptegra1_587563	Schco3_2631634	IPR012341::Six-hairpin glycosidase-like superfamily::9	IPR008928::Six-hairpin glycosidase superfamily::9	IPR000165::Glucoamylase::9	IPR011613::GH15-like domain::9	IPR013784::Carbohydrate-binding-like fold::8	IPR002044::Carbohydrate binding module family 20::8	IPR008291::Glucoamylase; starch-binding::8	IPR013783::Immunoglobulin-like fold::8			323	AN7402_glaB_Aspnid meu17_pombe YIL099W_SGA1_Sacce1 GLAA_Aspnig	Uncharacterized ORF Putative glucoamylase with a predicted role in starch metabolism		glucan-alpha-1;4-glucosidase	Intracellular sporulation-specific glucoamylase; involved in glycogen degradation; induced during starvation of a/a diploids late in sporulation; but dispensable for sporulation
Cons_Shared	orbh_2282	4	1	4	2	1	1	4	4	4	9	5	0.625	-	Agabi_varbisH97_2_209178	Armosto1_270188	Auramp1_506419	Copci_AmutBmut1_495987	Cryne_JEC21_1_5055	Mk_01292200	PleosPC15_2_1058949	Ptegra1_513620	Schco3_2068434	IPR000811::Glycosyl transferase; family 35::9	IPR035090::Phosphorylase pyridoxal-phosphate attachment site::9	IPR011833::Glycogen/starch/alpha-glucan phosphorylase::9								381	AN1015_Aspnid NCU07027_Neucr YPR160W_GPH1_Sacce1	Putative phosphorylase with a predicted role in glycogen degradation			Glycogen phosphorylase required for the mobilization of glycogen; non-essential; regulated by cyclic AMP-mediated phosphorylation; expression is regulated by stress-response elements and by the HOG MAP kise pathway
Cons_Shared	orbh_4422	4	1	4	0	1	2	4	2	4	8	5	0.714286	-	Agabi_varbisH97_2_211997	Armosto1_262215	Auramp1_450489	Copci_AmutBmut1_365699	Cryne_JEC21_1_364		PleosPC15_2_1112299	Ptegra1_560895	Schco3_2623174	IPR006047::Glycosyl hydrolase; family 13; catalytic domain::8	IPR013783::Immunoglobulin-like fold::8	IPR017853::Glycoside hydrolase superfamily::8	IPR037439::1;4-alpha-glucan-branching enzyme::8	IPR013780::Glycosyl hydrolase; all-beta::8	IPR006048::Alpha-amylase/branching enzyme; C-termil all beta::8	IPR014756::Immunoglobulin E-set::7	IPR004193::Glycoside hydrolase; family 13; N-termil::7			410	GLC3_cryptococcus AN2314_Aspnid NCU05429_Neucr be1_Aspnid YEL011W_GLC3_Sacce1	Uncharacterized ORF Putative 1;4-alpha-glucan branching enzyme with a predicted role in starch metabolism			Glycogen branching enzyme; involved in glycogen accumulation; green fluorescent protein (GFP)-fusion protein localizes to the cytoplasm in a punctate pattern; relocalizes from nucleus to cytoplasmic foci upon D replication stress
Cons_Shared	orbh_3238	4	4	4	2	2	2	4	4	4	9	8	1	-	Agabi_varbisH97_2_175584	Armosto1_258799	Auramp1_564145	Copci_AmutBmut1_544130	Cryne_JEC21_1_4330	Mk_00861300	PleosPC15_2_1096303	Ptegra1_593933	Schco3_2520592	IPR005036::CBM21 (carbohydrate binding type-21) domain::9	IPR038175::CBM21 domain superfamily::8									29
Cons_Shared	orbh_1253	4	2	4	2	4	4	4	2	4	9	8	1	-	Agabi_varbisH97_2_190782	Armosto1_257865	Auramp1_570542	Copci_AmutBmut1_540817	Cryne_JEC21_1_5637	Mk_01180200	PleosPC15_2_1060842	Ptegra1_557197	Schco3_2606323	IPR001296::Glycosyl transferase; family 1::9										302	AN5021_Aspnid; ccg-9_Neucr	Uncharacterized ORF Orthologs have role in conidium formation; regulation of growth rate
Cons_Shared	orbh_271	4	2	2	2	2	4	2	2	2	9	8	1	-	Agabi_varbisH97_2_134738	Armosto1_253163	Auramp1_547574	Copci_AmutBmut1_437212	Cryne_JEC21_1_2548	Mk_01007200	PleosPC15_2_1113902	Ptegra1_197595	Schco3_2642810	IPR001661::Glycoside hydrolase; family 37::9	IPR011120::Neutral trehalase Ca2+ binding::9	IPR008928::Six-hairpin glycosidase superfamily::9	IPR018232::Glycoside hydrolase; family 37; conserved site::8							421	AN5635_treB_Aspnid treB_Aspnid ntp1_pombe YDR001C_NTH1_Sacce1	Verified ORF Putative alpha; alpha-trehalase with a predicted role in trehalose hydrolysis		alpha;alpha-trehalase Ntp1	Neutral trehalase; degrades trehalose; required for thermotolerance and may mediate resistance to other cellular stresses; may be phosphorylated by Cdc28p; inhibited by Dcs1p; NTH1 has a paralog; NTH2; that arose from the whole genome duplication
Cons_Shared	orbh_2221	4	1	4	4	2	2	2	2	4	9	7	0.875	-	Agabi_varbisH97_2_206816	Armosto1_260519	Auramp1_548844	Copci_AmutBmut1_376383	Cryne_JEC21_1_5258	Mk_00610900	PleosPC15_2_1094192	Ptegra1_523875	Schco3_2614269	IPR001661::Glycoside hydrolase; family 37::9	IPR008928::Six-hairpin glycosidase superfamily::9	IPR018232::Glycoside hydrolase; family 37; conserved site::5								231	tre-1_Neucr
Cons_Shared	orbh_155	4	1	4	2	1	1	2	2	4	9	5	0.625	-	Agabi_varbisH97_2_120329	Armosto1_251430	Auramp1_537035	Copci_AmutBmut1_473004	Cryne_JEC21_1_2530	Mk_00417000	PleosPC15_2_1091820	Ptegra1_514146	Schco3_2641195	IPR006379::HAD-superfamily hydrolase; subfamily IIB::9	IPR001830::Glycosyl transferase; family 20::9	IPR003337::Trehalose-phosphatase::9	IPR036412::HAD-like superfamily::9	IPR023214::HAD superfamily::9						412	AN3441_orlA_Aspnid NCU05041_Neucr tpp1_pombe YDR074W_TPS2_Sacce1	Verified ORF Trehalose 6-phosphate phosphatase; predicted subunit of the trehalose-6-phosphate synthase/phosphatase complex involved in chitin synthesis at elevated temperatures		trehalose-6-phosphate phosphatase Tpp1	Phosphatase subunit of the trehalose-6-P synthase/phosphatase complex; involved in synthesis of the storage carbohydrate trehalose; expression is induced by stress conditions and repressed by the Ras-cAMP pathway; protein abundance increases in response to D replication stress
Cons_Shared	orbh_852	4	1	2	4	2	1	4	4	2	9	6	0.75	-	Agabi_varbisH97_2_185889	Armosto1_265323	Auramp1_571515	Copci_AmutBmut1_418721	Cryne_JEC21_1_3823	Mk_00013600	PleosPC15_2_1097392	Ptegra1_547487	Schco3_2617483	IPR018483::Carbohydrate kise; FGGY; conserved site::9	IPR018484::Carbohydrate kise; FGGY; N-termil::9	IPR043129::ATPase; nucleotide binding domain::9	IPR018485::Carbohydrate kise; FGGY; C-termil::9	IPR000577::Carbohydrate kise; FGGY::7	IPR005999::Glycerol kise::7					414	NCU06005_Neucr YHL032C_GUT1_Sacce1 AN3916_Aspnid	Uncharacterized ORF Putative glycerol kise with a predicted role in glycerol metabolism			Glycerol kise; converts glycerol to glycerol-3-phosphate; glucose repression of expression is mediated by Adr1p and Ino2p-Ino4p; derepression of expression on non-fermentable carbon sources is mediated by Opi1p and Rsf1p
Cons_Shared	orbh_2615	2	2	4	1	1	1	4	4	4	9	5	0.625	-	Agabi_varbisH97_2_225147	Armosto1_251858	Auramp1_495120	Copci_AmutBmut1_364672	Cryne_JEC21_1_2493	Mk_00429400	PleosPC15_2_1088122	Ptegra1_562642	Schco3_2641114	IPR005913::dTDP-4-dehydrorhamnose reductase family::9	IPR036291::D(P)-binding domain superfamily::9	IPR029903::RmlD-like substrate binding domain::9								318	NCU01177_Neucr; aspgd says AN8032 is an ortholog.	Putative C-3 sterol dehydrogese; expression upregulated after exposure to farnesol
Cons_Shared	orbh_1338	4	2	2	2	1	1	2	2	2	9	6	0.75	-	Agabi_varbisH97_2_191701	Armosto1_262163	Auramp1_481396	Copci_AmutBmut1_441034	Cryne_JEC21_1_3928	Mk_01435500	PleosPC15_2_1038313	Ptegra1_560263	Schco3_2623734	IPR024084::Isopropylmalate dehydrogese-like domain::9	IPR019818::Isocitrate/isopropylmalate dehydrogese; conserved site::9
Cons_Shared	orbh_2920	4	1	2	4	4	4	2	4	2	9	7	0.875	-	Agabi_varbisH97_2_72311	Armosto1_264117	Auramp1_418854	Copci_AmutBmut1_410146	Cryne_JEC21_1_2105	Mk_00904400	PleosPC15_2_1066452	Ptegra1_648844	Schco3_2520682	IPR001752::Kinesin motor domain::9	IPR019821::Kinesin motor domain; conserved site::9	IPR027417::P-loop containing nucleoside triphosphate hydrolase::9	IPR036961::Kinesin motor domain superfamily::8	IPR027640::Kinesin-like protein::2						260	AN8286_kipA_Aspnid	Verified ORF Kinesin; CENP-E family microtubule plus-end-directed motor activity required for wild-type hyphal morphology; microtubule arrangement at hyphal tip; localization of Spitzenkorper; TeaA and TeaR; polarity of germ tube emergence
Cons_Shared	orbh_1945	4	1	2	1	2	4	2	2	2	9	6	0.75	-	Agabi_varbisH97_2_198050	Armosto1_268443	Auramp1_407988	Copci_AmutBmut1_493867	Cryne_JEC21_1_2219	Mk_00822200	PleosPC15_2_1092386	Ptegra1_647761	Schco3_2612334	IPR036378::FAS1 domain superfamily::9	IPR000782::FAS1 domain::9	IPR018108::Mitochondrial substrate/solute carrier::3	IPR023395::Mitochondrial carrier domain superfamily::3							163
Cons_Shared	orbh_3223	4	1	4	4	1	4	4	4	4	9	6	0.75	-	Agabi_varbisH97_2_191032	Armosto1_253512	Auramp1_510935	Copci_AmutBmut1_361505	Cryne_JEC21_1_5720	Mk_01380100	PleosPC15_2_1097844	Ptegra1_571223	Schco3_2607675	IPR035992::Ricin B-like lectins::8	IPR000772::Ricin B; lectin domain::8									37
Cons_Shared	orbh_3131	4	1	4	4	4	1	2	4	1	9	5	0.625	-	Agabi_varbisH97_2_114104	Armosto1_268475	Auramp1_487445	Copci_AmutBmut1_359866	Cryne_JEC21_1_751	Mk_00817900	PleosPC15_2_1088534	Ptegra1_653070	Schco3_2611654	IPR038955::Protein PriA::7										47
Cons_Shared	orbh_5903	4	2	1	0	4	4	0	4	4	7	5	0.833333	-	Agabi_varbisH97_2_191092		Auramp1_570748	Copci_AmutBmut1_437522	Cryne_JEC21_1_1314		PleosPC15_2_1035796	Ptegra1_553737	Schco3_231154	IPR000772::Ricin B; lectin domain::7	IPR035992::Ricin B-like lectins::7									29
Cons_Shared	orbh_2637	4	2	4	4	4	4	4	4	4	9	8	1	-	Agabi_varbisH97_2_226405	Armosto1_256524	Auramp1_427319	Copci_AmutBmut1_543210	Cryne_JEC21_1_158	Mk_00220600	PleosPC15_2_1060380	Ptegra1_296466	Schco3_2675281	IPR008397::Algite lyase domain::9	IPR008929::Chondroitin AC/algite lyase::9									104
Cons_Shared	orbh_2921	4	2	2	2	4	2	4	4	4	9	8	1	-	Agabi_varbisH97_2_72409	Armosto1_260512	Auramp1_500026	Copci_AmutBmut1_376392	Cryne_JEC21_1_3215	Mk_01081100	PleosPC15_2_1044316	Ptegra1_506684	Schco3_2568507	IPR001330::PFTB repeat::9	IPR008930::Terpenoid cyclases/protein prenyltransferase alpha-alpha toroid::9									330	cwg2_pombe AN5760_Aspnid	Uncharacterized ORF Orthologs have CAAX-protein geranylgeranyltransferase activity; role in protein geranylgeranylation and CAAX-protein geranylgeranyltransferase complex localization		geranylgeranyltransferase I beta subunit Cwg2
Cons_Shared	orbh_2132	4	1	4	2	4	4	4	4	4	9	7	0.875	-	Agabi_varbisH97_2_203819	Armosto1_250440	Auramp1_393300	Copci_AmutBmut1_359180	Cryne_JEC21_1_2240	Mk_00654100	PleosPC15_2_28823	Ptegra1_505492	Schco3_2507941	IPR013616::Chitin synthase N-termil::9	IPR004834::Fungal chitin synthase::9	IPR004835::Chitin synthase::9	IPR029044::Nucleotide-diphospho-sugar transferases::7							128	CHS3_ustilago				Chitin synthase III; catalyzes the transfer of N-acetylglucosamine (Glcc) to chitin; required for synthesis of the majority of cell wall chitin; the chitin ring during bud emergence; and spore wall chitosan; contains overlapping di-leucine and di-acidic sigls that mediate; respectively; intracellular trafficking by AP-1 and trafficking to plasma membrane by exomer complex; requires AP-3 complex f…
Cons_Shared	orbh_3439	4	4	2	4	1	4	4	4	4	9	7	0.875	-	Agabi_varbisH97_2_189310	Armosto1_250056	Auramp1_393182	Copci_AmutBmut1_463000	Cryne_JEC21_1_4512	Mk_00713200	PleosPC15_2_1041466	Ptegra1_562489	Schco3_2585503	IPR024655::Uncharacterised protein family; glycosyl hydrolase catalytic domain::9	IPR017853::Glycoside hydrolase superfamily::9									184	AN3925_Aspnid asl1_pombe	Uncharacterized ORF Has domains with predicted catalytic activity and role in carbohydrate metabolic process		cell wall protein Asl1; predicted O-glucosyl hydrolase
Cons_Shared	orbh_1909	4	4	4	4	1	2	4	2	4	9	7	0.875	-	Agabi_varbisH97_2_196962	Armosto1_268995	Auramp1_487086	Copci_AmutBmut1_414471	Cryne_JEC21_1_4493	Mk_01278800	PleosPC15_2_1088664	Ptegra1_510566	Schco3_73246	IPR001547::Glycoside hydrolase; family 5::9	IPR017853::Glycoside hydrolase superfamily::9									253	XOG1_candida exgA_Aspnig AN4052_exgC_Aspnid YLR300W_EXG1_Sacce1 exg1_pombe	Uncharacterized ORF Putative glucan 1;3-beta-glucosidase with a predicted role in glucan metabolism		cell wall glucan 1;6-beta-glucosidase Exg1	Major exo-1;3-beta-glucase of the cell wall; involved in cell wall beta-glucan assembly; exists as three differentially glycosylated isoenzymes; EXG1 has a paralog; SPR1; that arose from the whole genome duplication
Cons_Shared	orbh_2995	4	1	4	4	2	2	4	4	4	9	7	0.875	-	Agabi_varbisH97_2_136031	Armosto1_250294	Auramp1_393271	Copci_AmutBmut1_413423	Cryne_JEC21_1_621	Mk_00670900	PleosPC15_2_1089518	Ptegra1_562951	Schco3_2751242	IPR006616::DM9 repeat::9	IPR024518::Domain of unknown function DUF3421::9	IPR036573::Carbohydrate-binding module superfamily 5/12::8								110
Cons_Shared	orbh_1345	4	2	2	2	4	1	4	2	4	9	7	0.875	-	Agabi_varbisH97_2_191760	Armosto1_261976	Auramp1_565009	Copci_AmutBmut1_389921	Cryne_JEC21_1_2106	Mk_00112000	PleosPC15_2_1055491	Ptegra1_523323	Schco3_63515	IPR000490::Glycoside hydrolase family 17::9	IPR017853::Glycoside hydrolase superfamily::9									66	YMR305C_SCW10_Sacce1 bgl2_pombe MP65_candida		Cell surface mannoprotein; cell-wall glucan metabolism; adhesion; adhesin motif; O-glycosylation; induced by heat; germ tube formation; wall regeneration; mycelial antigen; diagnostic marker; flucozole-repressed; Spider biofilm induced	glucan beta-glucosidase Bgl2 (predicted). Glucases possibly play a role in cell expansion during growth; in cell-cell fusion during mating; and in spore release during sporulation. This enzyme may be involved in beta-glucan degradation and also function biosynthetically as a transglycosylase.	Cell wall protein with similarity to glucases; may play a role in conjugation during mating based on mutant phenotype and its regulation by Ste12p; SWC10 has a paralog; SCW4; that arose from the whole genome duplication
Cons_Shared	orbh_2700	2	2	4	2	2	1	4	4	4	9	7	0.875	-	Agabi_varbisH97_2_229877	Armosto1_252535	Auramp1_509439	Copci_AmutBmut1_371191	Cryne_JEC21_1_5027	Mk_00503100	PleosPC15_2_1068271	Ptegra1_550159	Schco3_2642193	IPR039143::Glucosamine 6-phosphate N-acetyltransferase::9	IPR016181::Acyl-CoA N-acyltransferase::9	IPR000182::GT domain::9								415	AN8706_gA_Aspnid NCU01902_Neucr YFL017C_G1_Sacce1 g1_pombe	Uncharacterized ORF Putative glucosamine-phosphate N-acetyltransferase with a predicted role in chitin biosynthesis		glucosamine-phosphate N-acetyltransferase (predicted)	Glucosamine-6-phosphate acetyltransferase; evolutiorily conserved; required for multiple cell cycle events including passage through START; D synthesis; and mitosis; involved in UDP-N-acetylglucosamine synthesis; forms Glcc6P from AcCoA
Cons_Shared	orbh_2998	4	2	4	4	1	2	4	2	4	9	7	0.875	-	Agabi_varbisH97_2_198736	Armosto1_250390	Auramp1_390210	Copci_AmutBmut1_358231	Cryne_JEC21_1_1590	Mk_01023900	PleosPC15_2_1091306	Ptegra1_496186	Schco3_2563487	IPR007271::Nucleotide-sugar transporter::9										362	NCU09792_Neucr gms1_pombe AN10676_Aspnid	Uncharacterized ORF Orthologs have UDP-galactose transmembrane transporter activity; role in UDP-galactose transmembrane import into Golgi lumen; UDP-galactose transmembrane transport and integral component of Golgi membrane localization		Golgi UDP-galactose transmembrane transporter Gms1. Essential for the transport of UDP-galactose into the lumen of Golgi apparatus.
[truncated: 6,905 more rows]

## Sheet: b) Shared
Table S2b: Conserved Shared 1:1 orthologue groups. For the detailed description of columns see "Columns" worksheet.
GOenrichment	GO terms	Group	orbh	Cryne_JEC21_1	Ptegra1	PleosPC15_2	Mk	Auramp1	Schco3	Armosto1	Agabi_varbisH97_2	Copci_AmutBmut1	Sum	wCD	wC_rD	meiotic	Agabi_varbisH97_21	Armosto11	Auramp11	Copci_AmutBmut11	Cryne_JEC21_11	Mk1	PleosPC15_21	Ptegra11	Schco31	IPR1	IPR2	IPR3	IPR4	IPR5	IPR6	IPR7	IPR8	IPR9	IPR10	has.RBH.inxspecies	Orthologs	Aspnid	Candida	S.pombe	S.cerevisiae	known genes
[truncated: 913 more rows]

## Sheet: c) CM-specific
Table S2c: Conserved CM-specific 1:1 orthologue groups. For the detailed description of columns see "Columns" worksheet.
[truncated: 869 more rows]

## Sheet: d) cell-wall
Table S2d: Cell-wall realated orthologue groups. For the detailed description of columns see "Columns" worksheet.
[truncated: 106 more rows]

[truncated: 4 more sheets: e) defense, f) glycogen, g) TF, Sheet1]
