# Supplementary material for: Gene age shapes the transcriptional landscape of sexual morphogenesis in mushroom-forming fungi (Agaricomycetes)
Source: eLife. 2022 Feb 14;11:e71348. doi: 10.7554/eLife.71348 (PMC8893723; doi:10.7554/eLife.71348)
Supplement: Supplementary file 4. [file elife-71348-supp4.xlsx]

## Sheet: S3a
Table S3a: Species, which were used for the species tree estimation and phylostratigraphy
species_ID	Species	# of proteins	Transcriptome	Pleurotinae clade	Phylum	Class	Order	Family	JGI projectname	publication
Agabi_varbisH97_2	Leucoagaricus gongylophorus	10438	X		Agaricomycotina	Agaricomycetes	Agaricales	Agaricaceae	Agaricus bisporus	Morin E et al., 2012
Leugo1_1	Leucoagaricus gongylophorus	5420			Agaricomycotina	Agaricomycetes	Agaricales	Agaricaceae	Leucoagaricus gongylophorus Ac12	Rouxel T et al., 2011
Amamu1	Amanita muscaria	18153			Agaricomycotina	Agaricomycetes	Agaricales	Amanitaceae	Amanita muscaria Koide v1.0	Kohler A et al., 2015
Amath1	Amanita thiersii	10354			Agaricomycotina	Agaricomycetes	Agaricales	Amanitaceae	Amanita thiersii Skay4041 v1.0	Hess J et al., 2014
Hebcy2	Hebeloma cylindrosporum	15382			Agaricomycotina	Agaricomycetes	Agaricales	Cortinariaceae	Hebeloma cylindrosporum h7 v2.0	Kohler A et al., 2015
Fishe1	Fistulina hepatica	11244			Agaricomycotina	Agaricomycetes	Agaricales	Fistulinaceae	Fistulina hepatica v1.0	Vicente VA et al., N/D
Lacam2	Laccaria amethystina	17553			Agaricomycotina	Agaricomycetes	Agaricales	Hydnangiaceae	Laccaria amethystina LaAM-08-1 v2.0	Kohler A et al., 2015
Lacbi2	Laccaria bicolor	23132			Agaricomycotina	Agaricomycetes	Agaricales	Hydnangiaceae	Laccaria bicolor v2.0	Martin F et al., 2008
Denbi1	Dendrothele bispora	33645			Agaricomycotina	Agaricomycetes	Agaricales	Lachnellaceae	Dendrothele bispora CBS 962.96 v1.0	Casado López S et al., 2019
Monpe1_1	Moniliophthora perniciosa	13560			Agaricomycotina	Agaricomycetes	Agaricales	Marasmiaceae	Moniliophthora perniciosa FA553	Mondego JM et al., 2008
Mk	Mycena kentingensis	15046	X		Agaricomycotina	Agaricomycetes	Agaricales	Mycenaceae	requested from authors	Ke et al., 2020
Crula1	Crucibulum laeve	14218			Agaricomycotina	Agaricomycetes	Agaricales	Nidulariaceae	Crucibulum laeve CBS 166.37 v1.0	Janbon G et al., 2014
Lentinedodes1	Lentinula edodes	12538			Agaricomycotina	Agaricomycetes	Agaricales	Omphalotaceae	Lentinula edodes W1-26 v1.0	Chen L et al., 2016
Ompol1	Omphalotus olearius	8171			Agaricomycotina	Agaricomycetes	Agaricales	Omphalotaceae	Omphalotus olearius	Chang Y et al., 2021
Armcep1	Armillaria cepistipes	23460			Agaricomycotina	Agaricomycetes	Agaricales	Physalacriaceae	Armillaria cepistipes B5	Sipos G et al., 2017
Armga1	Armillaria gallica	25704			Agaricomycotina	Agaricomycetes	Agaricales	Physalacriaceae	Armillaria gallica 21-2 v1.0	Sipos G et al., 2017
Armosto1	Armillaria ostoyae	22705	X		Agaricomycotina	Agaricomycetes	Agaricales	Physalacriaceae	Armillaria ostoyae C18/9	Sipos G et al., 2017
Cylto1	Cylindrobasidium torrendii	13940			Agaricomycotina	Agaricomycetes	Agaricales	Physalacriaceae	Cylindrobasidium torrendii FP15055 v1.0	Floudas D et al., 2015
Pleery1	Pleurotus eryngii	15960		X	Agaricomycotina	Agaricomycetes	Agaricales	Pleurotaceae	Pleurotus eryngii ATCC 90797 v1.0	Haridas S et al., 2020
PleosPC15_2	Pleurotus ostreatus	12330	X	X	Agaricomycotina	Agaricomycetes	Agaricales	Pleurotaceae	Pleurotus ostreatus PC15 v2.0	Riley R et al., 2014
Plucer1	Pluteus cervinus	19818			Agaricomycotina	Agaricomycetes	Agaricales	Pluteaceae	Pluteus cervinus NL-1719 v1.0	Varga T et al., 2019
Volvo1	Volvariella volvacea	11084			Agaricomycotina	Agaricomycetes	Agaricales	Pluteaceae	Volvariella volvacea V23	Bao D et al., 2013
Copci_AmutBmut1	Coprinopsis cinerea	14245	X		Agaricomycotina	Agaricomycetes	Agaricales	Psathyrellaceae	Coprinopsis cinerea AmutBmut pab1-1 v1.0	Muraguchi H et al., 2015
Copmar1	Coprinopsis marcescibilis	14632			Agaricomycotina	Agaricomycetes	Agaricales	Psathyrellaceae	Coprinopsis marcescibilis CBS121175 v1.0	de Bekker C et al., 2017
Copmic2	Coprinellus micaceus	23559			Agaricomycotina	Agaricomycetes	Agaricales	Psathyrellaceae	Coprinellus micaceus FP101781 v2.0	Varga T et al., 2019
Aphpse1	Aphanobasidium pseudotsugae	11120		X	Agaricomycotina	Agaricomycetes	Agaricales	Pterulaceae	Aphanobasidium pseudotsugae OMC1630 v1.0	permitted by Otto Miettinen
Ptegra1	Pterula gracilis	12873	X	X	Agaricomycotina	Agaricomycetes	Agaricales	Pterulaceae	Pterula gracilis CBS309.79 v1.0	Nazareno ES et al., 2018
Radcon1	Radulomyces confluens	15506		X	Agaricomycotina	Agaricomycetes	Agaricales	Pterulaceae	Radulomyces confluens OMC1631 v1.0	Coleine C et al., 2017
Auramp1	Schizophyllum commune	15576	X		Agaricomycotina	Agaricomycetes	Agaricales	Schizophyllaceae	Auriculariopsis ampla	Gostinčar C et al., 2014
Schco3	Schizophyllum commune	16319	X		Agaricomycotina	Agaricomycetes	Agaricales	Schizophyllaceae	Schizophyllum commune H4-8 v3.0	Ohm RA et al., 2010
Galma1	Galerina marginata	21461			Agaricomycotina	Agaricomycetes	Agaricales	Strophariaceae	Galerina marginata v1.0	Malar C M et al., 2021
Psicub1_1	Psilocybe cubensis	13361			Agaricomycotina	Agaricomycetes	Agaricales	Strophariaceae	Psilocybe cubensis v1.0	Varga T et al., 2019
Cligib1	Clitocybe gibba	19049			Agaricomycotina	Agaricomycetes	Agaricales	Tricholomataceae	Clitocybe gibba IJFM A808 v1.0	Ohm RA et al., 2012
Lepnud1	Lepista nuda	14880			Agaricomycotina	Agaricomycetes	Agaricales	Tricholomataceae	Lepista nuda CBS 247.69 v1.0	Haridas S et al., 2020
Fibsp1	Fibulorhizoctonia sp.	32946			Agaricomycotina	Agaricomycetes	Atheliales	Atheliaceae	Fibulorhizoctonia sp. CBS 109695 v1.0	Hage H et al., 2021
Pilcr1	Piloderma croceum	21583			Agaricomycotina	Agaricomycetes	Atheliales	Atheliaceae	Piloderma croceum F 1598 v1.0	Haridas S et al., 2020
Plicr1	Plicaturopsis crispa	13626			Agaricomycotina	Agaricomycetes	Atheliales	Atheliaceae	Plicaturopsis crispa v1.0	Kohler A et al., 2015
Aurde3_1	Auricularia subglabra	25459			Agaricomycotina	Agaricomycetes	Auriculariales	Auriculariaceae	Auricularia subglabra v2.0	Gostinčar C et al., 2014
Exigl1	Exidia glandulosa	26765			Agaricomycotina	Agaricomycetes	Auriculariales	Exidiaceae	Exidia glandulosa v1.0	Nagy LG et al., 2016
Conol1	Coniophora olivacea	14928			Agaricomycotina	Agaricomycetes	Boletales	Coniophoraceae	Coniophora olivacea MUCL 20566 v1.0	Varga T et al., 2019
Conpu1	Coniophora puteana	13761			Agaricomycotina	Agaricomycetes	Boletales	Coniophoraceae	Coniophora puteana v1.0	Stajich JE et al., 2010
Melbro1	Melanogaster broomeianus	14167			Agaricomycotina	Agaricomycetes	Boletales	Melanogastraceae	Melanogaster broomeianus MBLB.BST v1.0	Miyauchi S et al., 2020
Hydpi2	Hydnomerulius pinastri	13270			Agaricomycotina	Agaricomycetes	Boletales	Paxillaceae	Hydnomerulius pinastri v2.0	Kohler A et al., 2015
Paxin1	Paxillus involutus	17968			Agaricomycotina	Agaricomycetes	Boletales	Paxillaceae	Paxillus involutus ATCC 200175 v1.0	Haridas S et al., 2020
Paxru2	Paxillus adelphus	18999			Agaricomycotina	Agaricomycetes	Boletales	Paxillaceae	Paxillus adelphus Ve08.2h10 v2.0	Kohler A et al., 2015
Pismi1	Pisolithus microcarpus	21064			Agaricomycotina	Agaricomycetes	Boletales	Pisolithaceae	Pisolithus microcarpus 441 v1.0	Kohler A et al., 2015
Rhives1	Rhizopogon vesiculosus	14218			Agaricomycotina	Agaricomycetes	Boletales	Rhizopogonaceae	Rhizopogon vesiculosus Smith	Lastovetsky OA et al., 2016
Rhivi1	Rhizopogon vinicolor	14469			Agaricomycotina	Agaricomycetes	Boletales	Rhizopogonaceae	Rhizopogon vinicolor AM-OR11-026 v1.0	Wang D et al., 2013
Sclci1	Scleroderma citrinum	21012			Agaricomycotina	Agaricomycetes	Boletales	Sclerodermataceae	Scleroderma citrinum Foug A v1.0	Kohler A et al., 2015
Serla_varsha1	Serpula himantioides	14495			Agaricomycotina	Agaricomycetes	Boletales	Serpulaceae	Serpula himantioides (S.lacrymans var shastensis) MUCL38935 v1.0	Balasundaram SV et al., 2018
SerlaS7_3_2	Serpula lacrymans	13805			Agaricomycotina	Agaricomycetes	Boletales	Serpulaceae	Serpula lacrymans S7.3 v2.0	Balasundaram SV et al., 2018
Suibr2	Suillus brevipes	21458			Agaricomycotina	Agaricomycetes	Boletales	Suillaceae	Suillus brevipes Sb2 v2.0	Lofgren LA et al., 2021
Suilu4	Suillus luteus	16588			Agaricomycotina	Agaricomycetes	Boletales	Suillaceae	Suillus luteus UH-Slu-Lm8-n1 v3.0	Kohler A et al., 2015
Botbo1	Botryobasidium botryosum	16526			Agaricomycotina	Agaricomycetes	Cantharellales	Botryobasidiaceae	Botryobasidium botryosum v1.0	Riley R et al., 2014
Rhiso1	Rhizoctonia solani	15157			Agaricomycotina	Agaricomycetes	Cantharellales	Ceratobasidiaceae	Rhizoctonia solani AG-1 IB	Wibberg D et al., 2013
Tulca1	Tulasnella calospora	19659			Agaricomycotina	Agaricomycetes	Cantharellales	Tulasnellaceae	Tulasnella calospora AL13/4D v1.0	Kohler A et al., 2015
Punst1	Punctularia strigosozonata	11538			Agaricomycotina	Agaricomycetes	Corticiales	Punctulariaceae	Punctularia strigosozonata v1.0	Cuomo CA et al., 2017
Sphst1	Sphaerobolus stellatus	35274			Agaricomycotina	Agaricomycetes	Geastrales	Sphaerobolaceae	Sphaerobolus stellatus v1.0	Kohler A et al., 2015
Glotr1_1	Gloeophyllum trabeum	11846			Agaricomycotina	Agaricomycetes	Gloeophyllales	Gloeophyllaceae	Gloeophyllum trabeum v1.0	DiGuistini S et al., 2011
Neole1	Neolentinus lepideus	13164			Agaricomycotina	Agaricomycetes	Gloeophyllales	Gloeophyllaceae	Neolentinus lepideus v1.0	Wilken SE et al., 2021
Ramac1	Ramaria rubella	19287			Agaricomycotina	Agaricomycetes	Gomphales	Gomphaceae	Ramaria rubella (R. acris) UT-36052-T v1.0	Miyauchi S et al., 2020
Fomme1	Fomitiporia mediterranea	11333			Agaricomycotina	Agaricomycetes	Hymenochaetales	Hymenochaetaceae	Fomitiporia mediterranea v1.0	Coleine C et al., 2020
Ricmel1	Rickenella mellea	17139			Agaricomycotina	Agaricomycetes	Hymenochaetales	Repetobasidiaceae	Rickenella mellea v1.0 (SZMC22713)	Korotkin HB et al., 2018
Schpa1	Schizopora paradoxa	17098			Agaricomycotina	Agaricomycetes	Hymenochaetales	Schizoporaceae	Schizopora paradoxa KUC8140 v1.0	Min B et al., 2015
Jaaar1	Jaapia argillacea	16419			Agaricomycotina	Agaricomycetes	Jaapiales	Jaapiaceae	Jaapia argillacea v1.0	Oliveira JVC et al., 2014
Trapub1	Trametes pubescens	14451			Agaricomycotina	Agaricomycetes	Polyporales	Coriolaceae	Trametes pubescens FBCC735	Granchi Z et al., 2017
Trave1	Trametes versicolor	14296			Agaricomycotina	Agaricomycetes	Polyporales	Coriolaceae	Trametes versicolor v1.0	Floudas D et al., 2012
PosplRSB12_1	Postia placenta	12541			Agaricomycotina	Agaricomycetes	Polyporales	Dacryobolaceae	Postia placenta MAD-698-R-SB12 v1.0	Gaskell J et al., 2017
Daequ1	Daedalea quercina	12199			Agaricomycotina	Agaricomycetes	Polyporales	Fomitopsidaceae	Daedalea quercina v1.0	Nagy LG et al., 2016
Fompi3	Fomitopsis pinicola	13885			Agaricomycotina	Agaricomycetes	Polyporales	Fomitopsidaceae	Fomitopsis pinicola FP-58527 SS1 v3.0	Coleine C et al., 2020
Gansp1	Ganoderma sp.	12910			Agaricomycotina	Agaricomycetes	Polyporales	Ganodermataceae	Ganoderma sp. 10597 SS1 v1.0	Chen L et al., 2013
Fibra1	Fibroporia radiculosa	9262			Agaricomycotina	Agaricomycetes	Polyporales	Incertae sedis	Fibroporia radiculosa TFFH 294	Tang JD et al., 2012
Obbri1	Obba rivulosa	13206			Agaricomycotina	Agaricomycetes	Polyporales	Incertae sedis	Obba rivulosa 3A-2 v1.0	Cornman RS et al., 2009
Laesu1	Laetiporus sulphureus	13774			Agaricomycotina	Agaricomycetes	Polyporales	Laetiporaceae	Laetiporus sulphureus var. sulphureus v1.0	Hage H et al., 2021
Wolco1	Wolfiporia cocos	12746			Agaricomycotina	Agaricomycetes	Polyporales	Laetiporaceae	Wolfiporia cocos MD-104 SS10 v1.0	Floudas D et al., 2012
Phlbr1	Phlebia brevispora	16170			Agaricomycotina	Agaricomycetes	Polyporales	Meruliaceae	Phlebia brevispora HHB-7030 SS6 v1.0	Binder M et al., 2013
Phlcen1	Phlebia centrifuga	13785			Agaricomycotina	Agaricomycetes	Polyporales	Meruliaceae	Phlebia centrifuga FBCC195	Mäkelä MR et al., 2018
Phaca1	Phanerochaete carnosa	13937			Agaricomycotina	Agaricomycetes	Polyporales	Phanerochaetaceae	Phanerochaete carnosa HHB-10118-Sp v1.0	Suzuki H et al., 2012
Phchr2	Phanerochaete chrysosporium	13602			Agaricomycotina	Agaricomycetes	Polyporales	Phanerochaetaceae	Phanerochaete chrysosporium RP-78 v2.2	Ohm RA et al., 2014
Dicsq1	Dichomitus squalens	12290			Agaricomycotina	Agaricomycetes	Polyporales	Polyporaceae	Dichomitus squalens LYAD-421 SS1 v1.0	Morales-Cruz A et al., 2015
Polar1	Polyporus arcularius	17525			Agaricomycotina	Agaricomycetes	Polyporales	Polyporaceae	Polyporus arcularius v1.0	Varga T et al., 2019
Polbr1	Polyporus brumalis	18244			Agaricomycotina	Agaricomycetes	Polyporales	Polyporaceae	Polyporus brumalis BRFM 1820 v1.0	Miyauchi S et al., 2020
Pycci1	Pycnoporus cinnabarinus	10442			Agaricomycotina	Agaricomycetes	Polyporales	Polyporaceae	Pycnoporus cinnabarinus BRFM 137	Wang G et al., 2016
Hetan2	Heterobasidion annosum	13405			Agaricomycotina	Agaricomycetes	Russulales	Bondarzewiaceae	Heterobasidion annosum v2.0	Coleine C et al., 2020
Stehi1	Stereum hirsutum	14072			Agaricomycotina	Agaricomycetes	Russulales	Stereaceae	Stereum hirsutum FP-91666 SS1 v1.0	Floudas D et al., 2012
Pirin1	Piriformospora indica	11767			Agaricomycotina	Agaricomycetes	Sebacinales	Sebacinaceae	Piriformospora indica DSM 11827 from MPI	Haitjema CH et al., 2017
Sebve1	Sebacina vermifera	15312			Agaricomycotina	Agaricomycetes	Sebacinales	Sebacinaceae	Sebacina vermifera MAFF 305830 v1.0	Amselem J et al., 2011
Sisni1	Sistotremastrum niveocremeum	13080			Agaricomycotina	Agaricomycetes	Trechisporales	Trechisporaceae	Sistotremastrum niveocremeum HHB9708 ss-1 1.0	Nagy LG et al., 2016
Sissu1	Sistotremastrum suecicum	13657			Agaricomycotina	Agaricomycetes	Trechisporales	Trechisporaceae	Sistotremastrum suecicum v1.0	Miyauchi S et al., 2020
Calco1	Calocera cornea	13177			Agaricomycotina	Dacrymycetes	Dacrymycetales	Dacrymycetaceae	Calocera cornea v1.0	Nagy LG et al., 2016
Calvi1	Calocera viscosa	12378			Agaricomycotina	Dacrymycetes	Dacrymycetales	Dacrymycetaceae	Calocera viscosa v1.0	Nagy LG et al., 2016
Dacsp1	Dacryopinax primogenitus	10242			Agaricomycotina	Dacrymycetes	Dacrymycetales	Dacrymycetaceae	Dacryopinax primogenitus DJM 731 SSP1 v1.0	Floudas D et al., 2012
Cryne_JEC21_1	Cryptococcus neoformans	6475	X		Agaricomycotina	Tremellomycetes	Tremellales	Incertae sedis	Cryptococcus neoformans var neoformans JEC21	Haridas S et al., 2020
Kocim1	Kockovaella imperatae	7393			Agaricomycotina	Tremellomycetes	Tremellales	Incertae sedis	Kockovaella imperatae NRRL Y-17943 v1.0	Mondo SJ et al., 2017
Trias2479	Trichosporon asahii	8300			Agaricomycotina	Tremellomycetes	Tremellales	Incertae sedis	Trichosporon asahii var. asahii CBS 2479	Haridas S et al., 2020
Triol1	Trichosporon oleaginosus	8322			Agaricomycotina	Tremellomycetes	Tremellales	Incertae sedis	Trichosporon oleaginosus IBC0246 v1.0	Miyauchi S et al., 2020
Treen1	Naematella encephela	7964			Agaricomycotina	Tremellomycetes	Tremellales	Tremellaceae	Naematella encephela UCDFST 68-887.2 v1.0	Hage H et al., 2021
Walic1	Wallemia ichthyophaga	4863			Agaricomycotina	Wallemiomycetes	Wallemiales	Wallemiaceae	Wallemia ichthyophaga EXF-994	Zajc J et al., 2013
Walse1	Wallemia mellicola	5284			Agaricomycotina	Wallemiomycetes	Wallemiales	Wallemiaceae	Wallemia mellicola v1.0	Padamsee M et al., 2012
Aspnid1	Aspergillus nidulans	10680			Pezizomycotina	Eurotiomycetes	Eurotiales	Aspergillaceae	Aspergillus nidulans	Arnaud MB et al., 2012
Fusgr1	Fusarium graminearum	13322			Pezizomycotina	Sordariomycetes	Hypocreales	Nectriaceae	Fusarium graminearum v1.0	DeIulio GA et al., 2018
Neucr2	Neurospora crassa	10785			Pezizomycotina	Sordariomycetes	Sordariales	Sordariaceae	Neurospora crassa OR74A v2.0	Gómez-Cortecero A et al., 2015
Rhomi1	Cystobasidium minutum	7814			Pucciniomycotina	Cystobasidiomycetes	Cystobasidiales	Cystobasidiaceae	Cystobasidium minutum MCA 4210 v1.0	Zhang S et al., 2016
Pucgr2	Puccinia graminis	15979			Pucciniomycotina	Pucciniomycetes	Pucciniales	Pucciniaceae	Puccinia graminis f. sp. tritici v2.0	Li F et al., 2019
Sacce1	Saccharomyces cerevisiae	6575			Saccharomycotina	Saccharomycetes	Saccharomycetales	Saccharomycetaceae	Saccharomyces cerevisiae S288C	Brown SD et al., 2013
Schpo1	Schizosaccharomyces pombe	5134			Taphrinomycotina	Schizosaccharomycetes	Schizosaccharomycetales	Schizosaccharomycetaceae	Schizosaccharomyces pombe	Wood V et al., 2002
Tilan2	Tilletiaria anomala	6810			Ustilaginomycotina	Exobasidiomycetes	Georgefischeriales	Tilletiariaceae	Tilletiaria anomala UBC 951 v1.0	Toome M et al., 2014
Tescy1	Testicularia cyperi	7069			Ustilaginomycotina	Ustilaginomycetes	Ustilaginales	Cintractiellaceae	Testicularia cyperi MCA 3645 v1.0	Murat C et al., 2018
Ustma2_2	Ustilago maydis	6785			Ustilaginomycotina	Ustilaginomycetes	Ustilaginales	Ustilaginaceae	Ustilago maydis 521 v2.0	Kämper J et al., 2006

## Sheet: S3b
Table S3b: Species which were used for transcriptomic analysis
species	short name	number of stages (each stage consist 2-3 replicates)	GFF	Assembly	available at
Agaricus bisporus	Abisporus_varbisporusH97	17	Abisporus_varbisporusH97.v2.FilteredModels3.gff	Abisporus_varbisporusH97.v2_AssembledScaffolds.fasta	JGI
Armillaria ostoyae	Armosto1	10	Armosto1_GeneCatalog_20170112.gff3	Armosto1_AssemblyScaffolds.fasta	JGI
Auriculariopsis ampla	Auramp1	5	Auramp1_GeneCatalog_20160719.gff3	Auramp1_AssemblyScaffolds.fasta	JGI
Coprinopsis cinerea	Copci_AmutBmut1	9	Copci_AmutBmut1_FrozenGeneCatalog_20160912_deflines.gff3	Copci_AmutBmut1_AssemblyScaffolds.fasta	JGI
Cryptococcus neoformans	Cryne_JEC21_1	5	Cryne_JEC21_1.filtered_proteins.ExternalModels.gff3	Cryne_JEC21_1_AssemblyScaffolds.fasta	JGI
Mycena kentingensis	Mk	5	Mk.gff	Mk.assembly.fa	required from authors
Pleurotus ostreatus	PleosPC15_2	11	PleosPC15_2_FilteredModels1_deflines.gff3	PleosPC15_2_Assembly_scaffolds.fasta	JGI
Pterula gracilis	Ptegra1	4	Ptegra1_GeneCatalog_20151205.gff3	Ptegra1_AssemblyScaffolds.fasta	JGI
Schizophillum commune	Schco3	4	Schco3_FilteredModels1_deflines.gff3	Schco3_AssemblyScaffolds.fasta	JGI

## Sheet: S3c
Table S3c: Stages and tissue types which were sampled for RNA-seq.
species	abbreviation of stages	stages	tissue	comment	Reference
Schizophillum commune	SC.VM	vegetative mycelium			Krizsán, K., Almási, É., Merényi, Z., Sahu, N., Virágh, M., Kószó, T., ... & Barry, K. (2019). Transcriptomic atlas of mushroom development reveals conserved genes behind complex multicellularity in fungi. Proceedings of the National Academy of Sciences, 116(15), 7409-7418.
	SC.P	Primordia
	SC.YFB	young fruiting body
	SC.FB	fruiting body
Pterula gracilis	Pg.VM	vegetative mycelium			This study
	Pg.P	Primordia
	Pg.YFB	young fruiting body
	Pg.FB	fruiting body
Pleurotus ostreatus	Po.VM	vegetative mycelium			This study
	Po.P1	Primordia 1		Primordia 2 stages was excluded
	Po.P3.H	Primordia 3	cap (cap trama+lamellae+cuticle)
	Po.P3.S	Primordia 3	stipe
	Po.YFB.H	young fruiting body	cap (cap trama+lamellae+cuticle)
	Po.YFB.S	young fruiting body	stipe
	Po.FB.C	fruiting body	cap trama
	Po.FB.D	fruiting body	dedifferentiated cap trama tissue	excluded from the Developmental Gene detection
	Po.FB.L	fruiting body	lamellae
	Po.FB.S	fruiting body	stipe
	Po.FB.V	fruiting body	cap cuticle
Cryptococcus neoformans	Cn.6h	first, 6h stage (~vegetative mycelium)			Liu, L., He, G. J., Chen, L., Zheng, J., Chen, Y., Shen, L., ... & Wang, L. (2018). Genetic basis for coordination of meiosis and sexual structure maturation in Cryptococcus neoformans. Elife, 7, e38683.
	Cn.12h	12 h stage
	Cn.24h	24 h stage
	Cn.48h	48 h stage
	Cn.72h	72 h stage
Coprinopsis cinerea	CC.VM	vegetative mycelium			Krizsán, K., Almási, É., Merényi, Z., Sahu, N., Virágh, M., Kószó, T., ... & Barry, K. (2019). Transcriptomic atlas of mushroom development reveals conserved genes behind complex multicellularity in fungi. Proceedings of the National Academy of Sciences, 116(15), 7409-7418.
	CC.H	Hyphal knot
	CC.P1	Primordia 1
	CC.P2	Primordia 2
	CC.YFB.C	young fruiting body	cap
	CC.YFB.L	young fruiting body	lamellae
	CC.YFB.S	young fruiting body	stipe
	CC.FB.C	fruiting body	cap+lamellae
	CC.FB.S	fruiting body	stipe
Auriculariopsis ampla	AUA.VM	vegetative mycelium			Almasi, E., Sahu, N., Krizsan, K., Balint, B., Kovacs, G. M., Kiss, B., ... & Chovatia, M. (2019). The genome of Auriculariopsis ampla sheds light on fruiting body development and wood-decay of bark-inhabiting fungi. BioRxiv, 550103.
	AUA.P1	Primordia 1
	AUA.P2	Primordia 2
	AUA.YFB	young fruiting body
	AUA.FB	fruiting body
Armillaria ostoyae	ARO.VM	vegetative mycelium			Sipos, G., Prasanna, A. N., Walter, M. C., O’Connor, E., Bálint, B., Krizsán, K., ... & Riley, R. (2017). Genome expansion and lineage-specific genetic innovations in the forest pathogenic fungi Armillaria. Nature ecology & evolution, 1(12), 1931-1941.
	ARO.RMA	rhizomorphs		excluded from the Developmental Gene detection
	ARO.P1	Primordia 1
	ARO.P2.C	Primordia 2	cap(+lamellae)
	ARO.P2.S	Primordia 2	stipe
	ARO.YFB.C	young fruiting body	cap(+lamellae)
	ARO.YFB.S	young fruiting body	stipe
	ARO.FB.C	fruiting body	cap
	ARO.FB.L	fruiting body	lamellae
	ARO.FB.S	fruiting body	stipe
Agaricus bisporus	Ab.VM	vegetative mycelium			Gehrmann, T., Pelkmans, J. F., Ohm, R. A., Vos, A. M., Sonnenberg, A. S., Baars, J. J., ... & Abeel, T. (2018). Nucleus-specific expression in the multinuclear mushroom-forming fungus Agaricus bisporus reveals different nuclear regulatory programs. Proceedings of the National Academy of Sciences, 115(17), 4429-4434.
	Ab.P1	Primordia 1		named initials in the original article
	Ab.P2.Sc	Primordia 2		named pileal/stipeal in the original article
	Ab.P2.Ss	Primordia 2		named pileal/stipeal in the original article
	Ab.YFB.C	young fruiting body	cap	named differentiated in the original article
	Ab.YFB.L	young fruiting body	lamellae	named differentiated in the original article
	Ab.YFB.Sc	young fruiting body	stipe central	named differentiated in the original article
	Ab.YFB.Ss	young fruiting body	stipe shell	named differentiated in the original article
	Ab.YFB.Sv	young fruiting body	stipe outer layer	named differentiated in the original article
	Ab.YFB.V	young fruiting body	veil	named differentiated in the original article
	Ab.FB.C	fruiting body	cap	named young fruiting body in the original article
	Ab.FB.L	fruiting body	lamellae	named young fruiting body in the original article
	Ab.FB.Sc	fruiting body	stipe central	named young fruiting body in the original article
	Ab.FB.Ss	fruiting body	stipe shell	named young fruiting body in the original article
	Ab.FB.Sv	fruiting body	stipe outer layer	named young fruiting body in the original article
	Ab.FB.V	fruiting body	veil	named young fruiting body in the original article
	Ab.FB.A	fruiting body	annulus	named young fruiting body in the original article
Mycena kentingensis	Mk.VM	vegetative mycelium			Ke, H. M., Lee, H. H., Lin, C. Y. I., Liu, Y. C., Lu, M. R., Hsieh, J. W. A., ... & Tsai, I. J. (2020). Mycena genomes resolve the evolution of fungal bioluminescence. Proceedings of the National Academy of Sciences, 117(49), 31267-31277.
	Mk.P	Primordia
	Mk.YFB	young fruiting body
	Mk.FBS	fruiting body	stipe
	Mk.FBC	fruiting body	cap
